# Supplementary material
Source: PubMed Central journal article supplement (PMC5148652)

# Surface exposure of novel sites

Modeled with Phyre<sup>2</sup>

# Hsp26 dimethyl R89

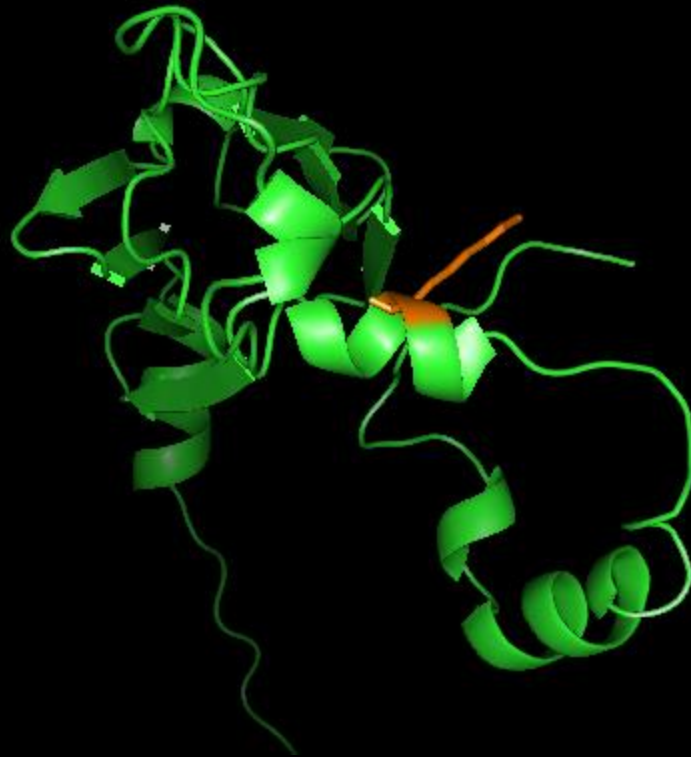

# Pdb1 monomethyl R55

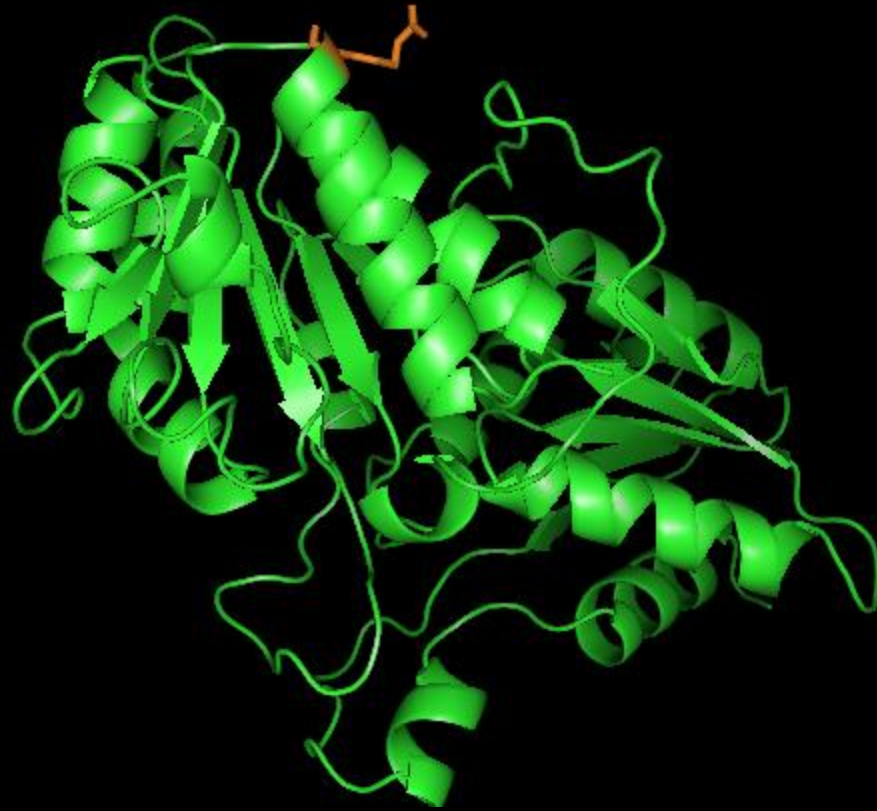

# Pst2 monomethyl K144

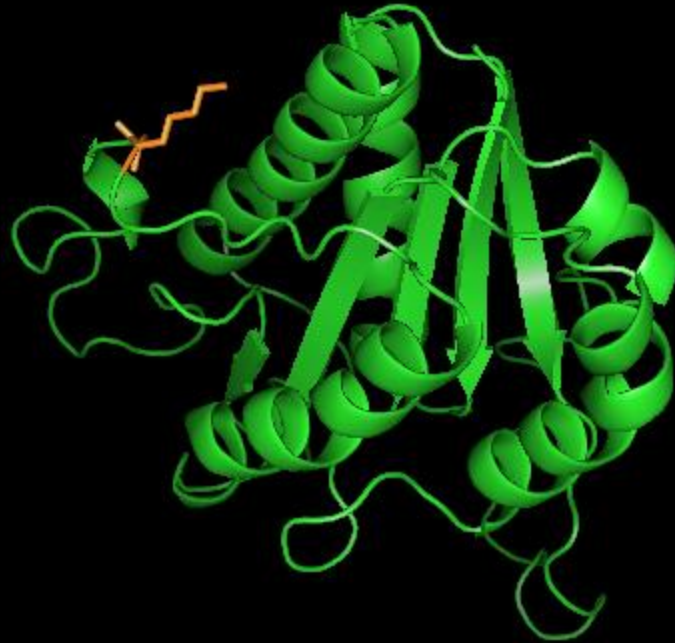

# Ecm10 monomethyl K558

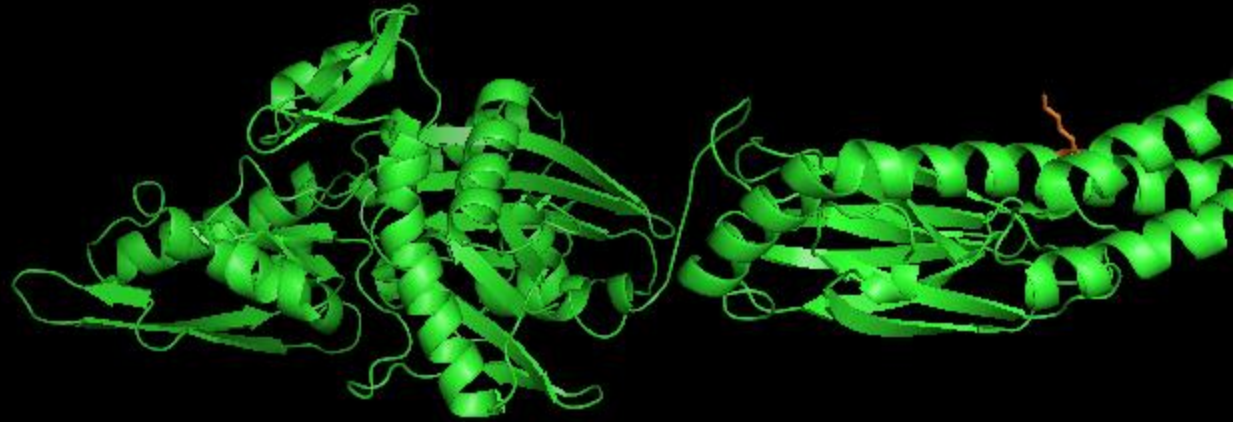

# Ald5 trimethyl K308

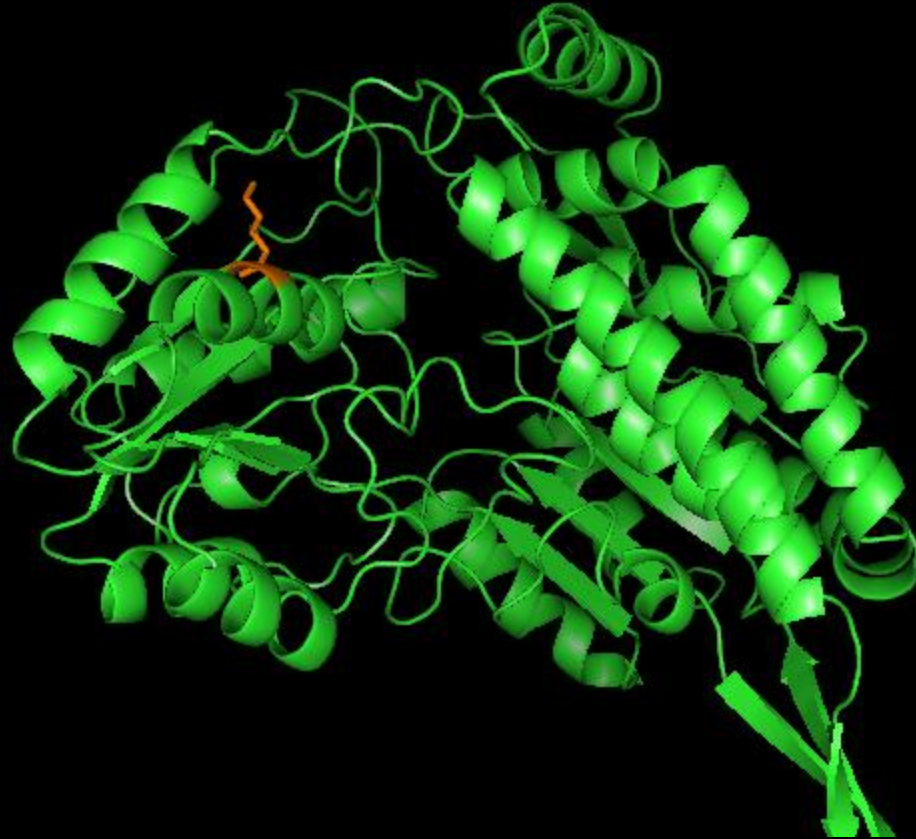

# Ssa4 monomethyl K422

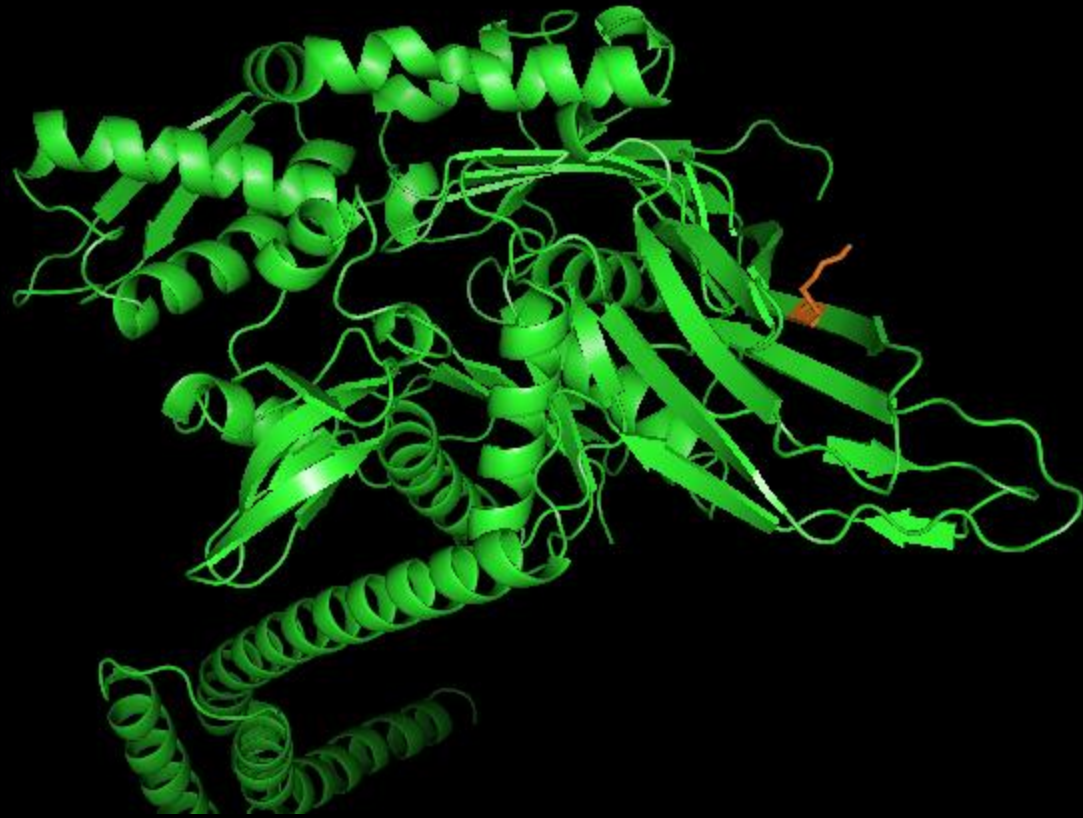

# Ssa2 monomethyl K421

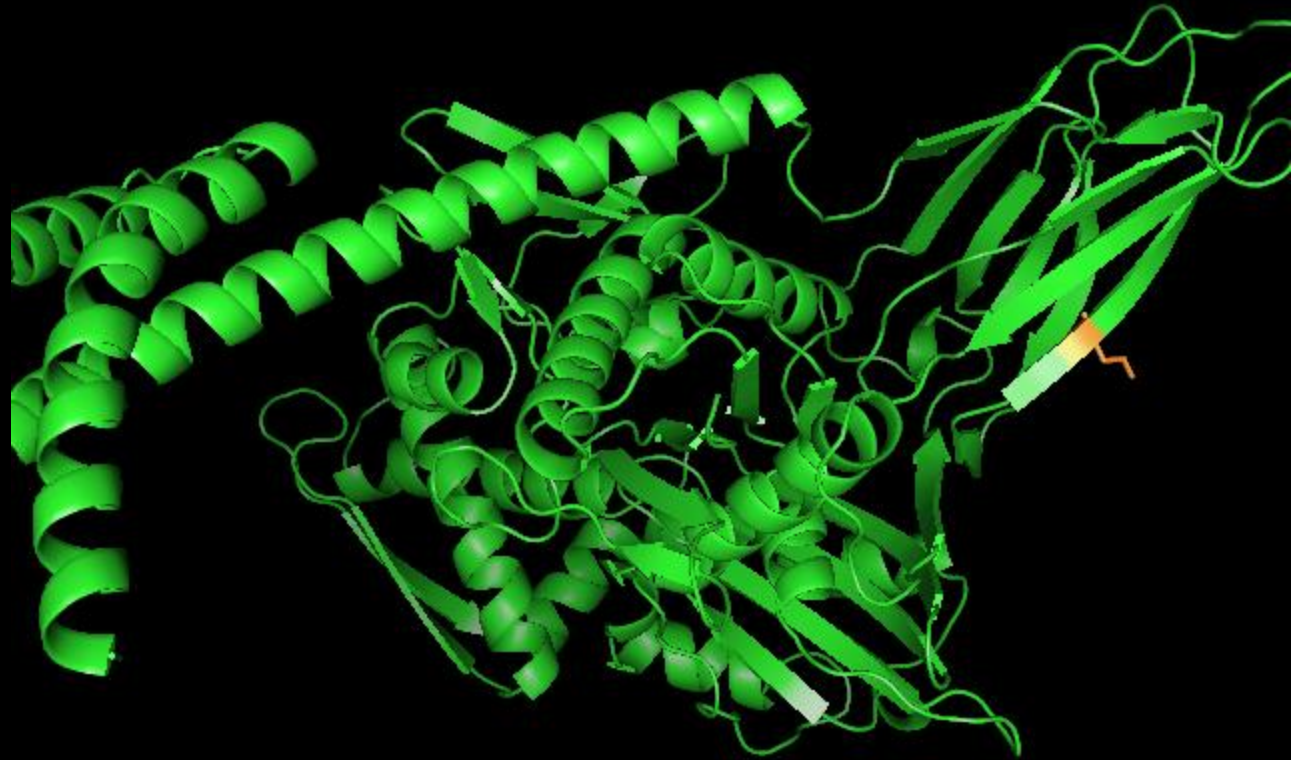



# Mnp1 dimethyl K56

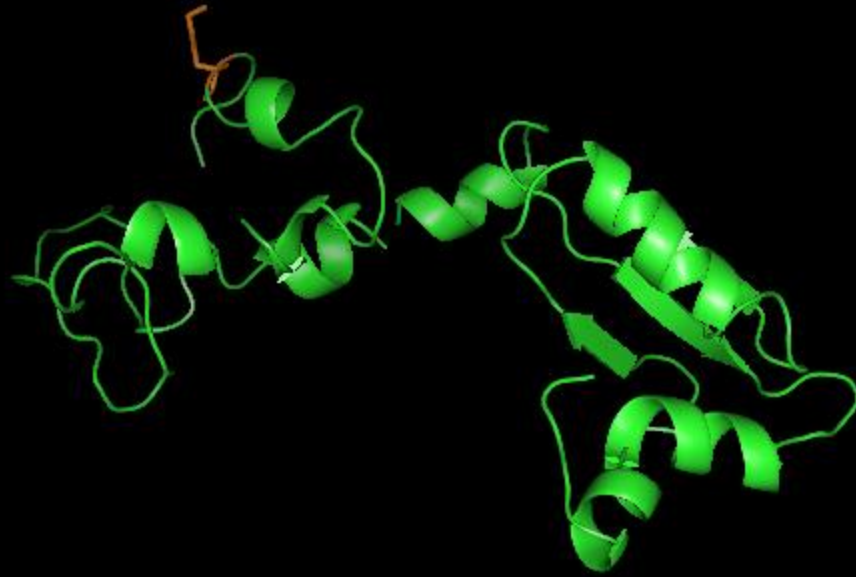

# Rps2 monomethyl K49

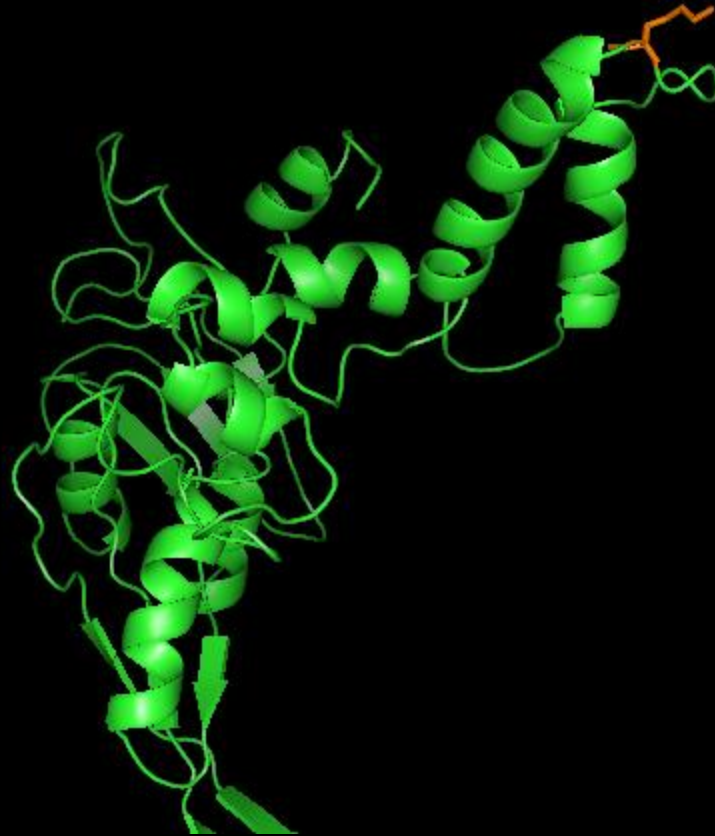

# Hsp60 trimethyl 490

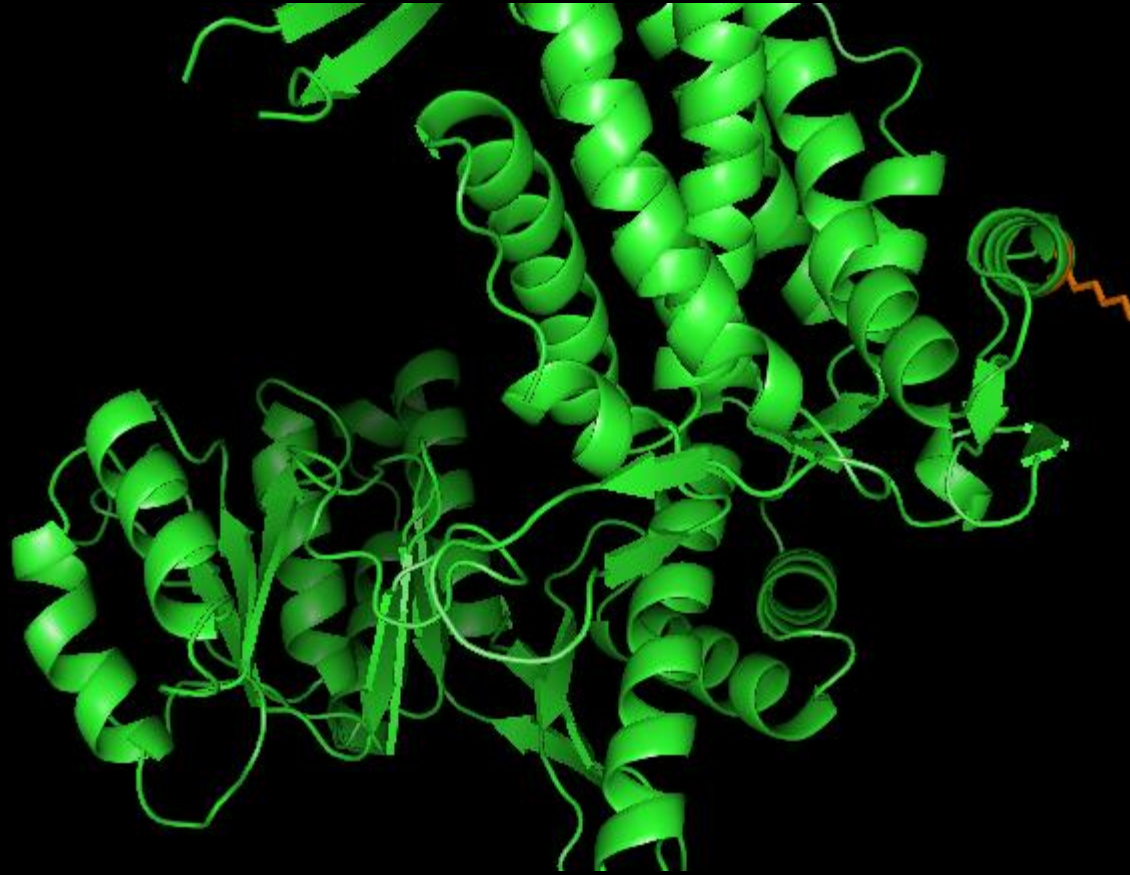

# Aco1 dimethyl K360

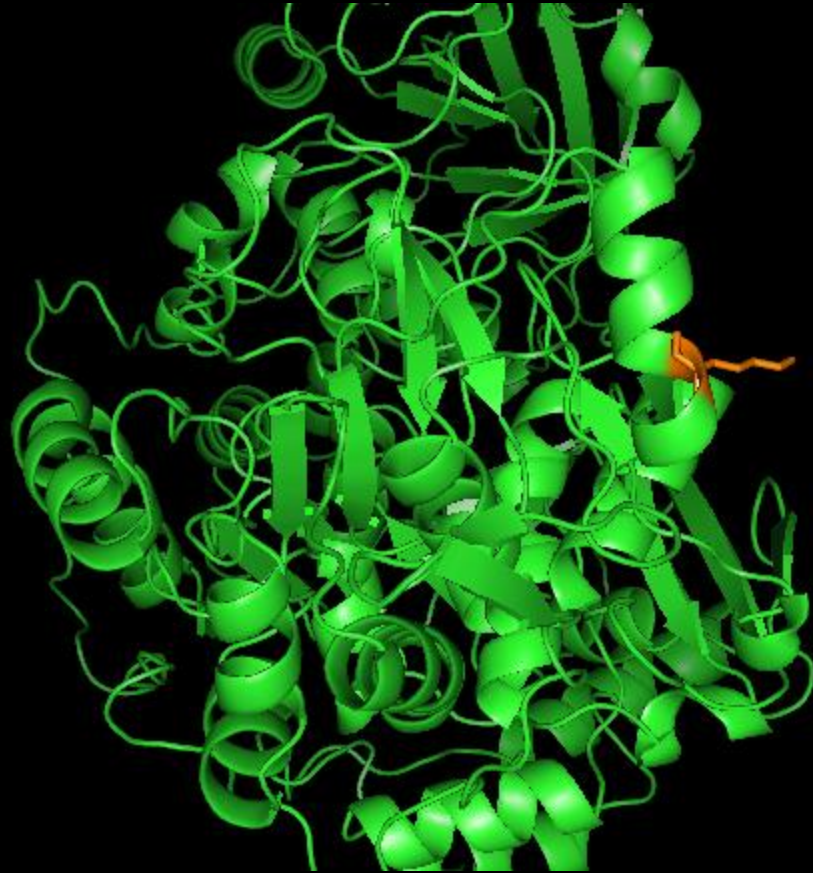

# Mrpl4 monomethyl R204

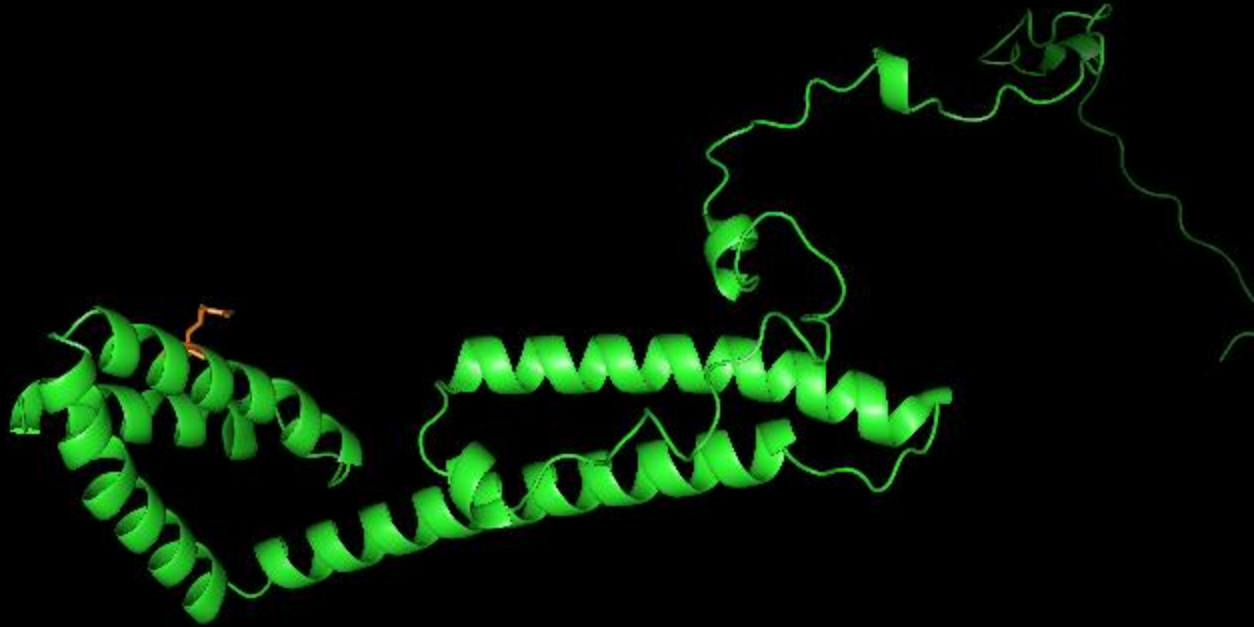

# Lat1 monomethyl R260

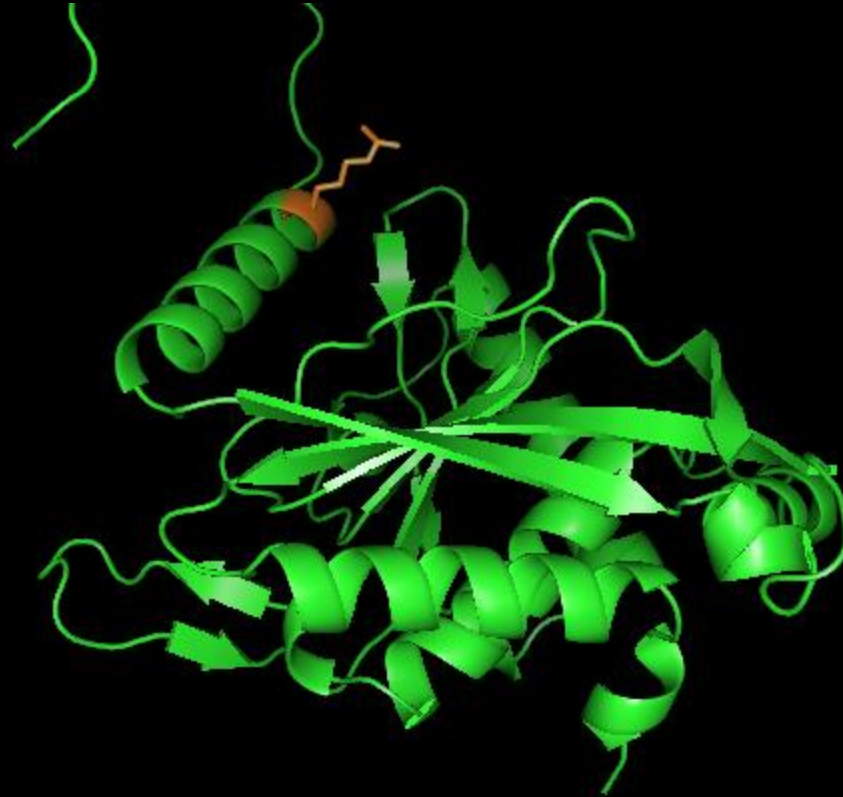

# Lat1 dimethyl K340

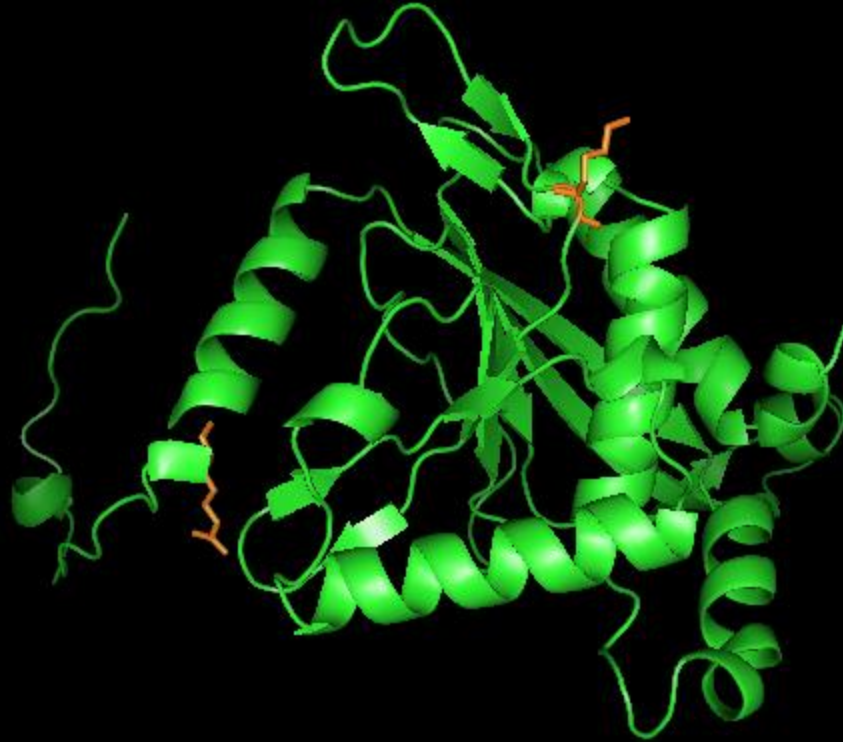



# Ald4 trimethyl K345

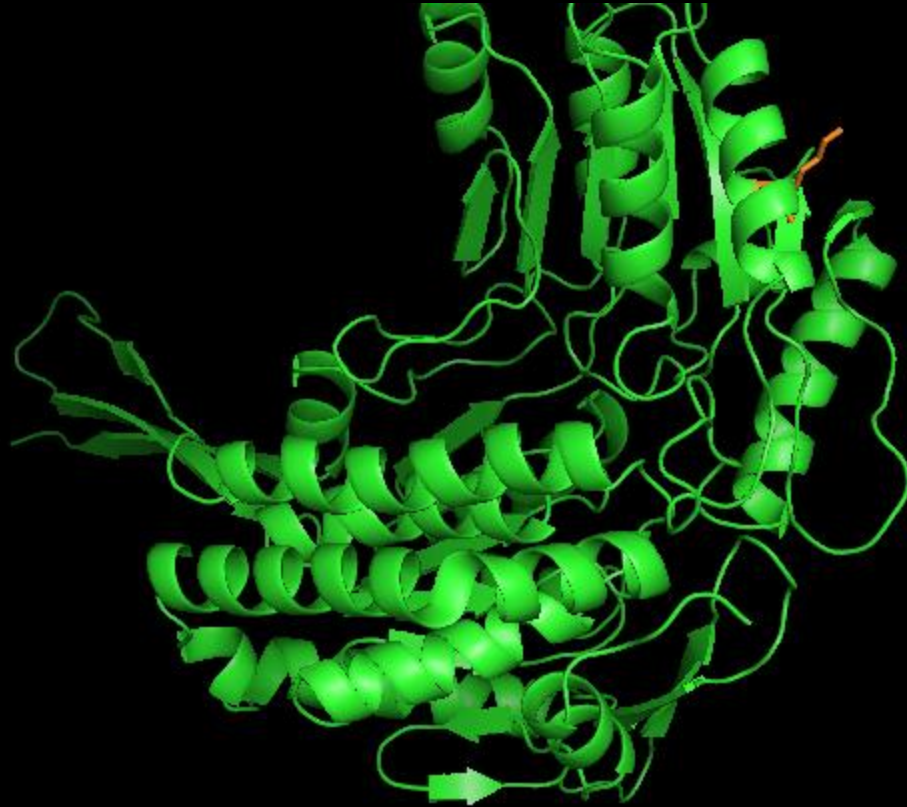



# Mrpl40 monomethyl K186

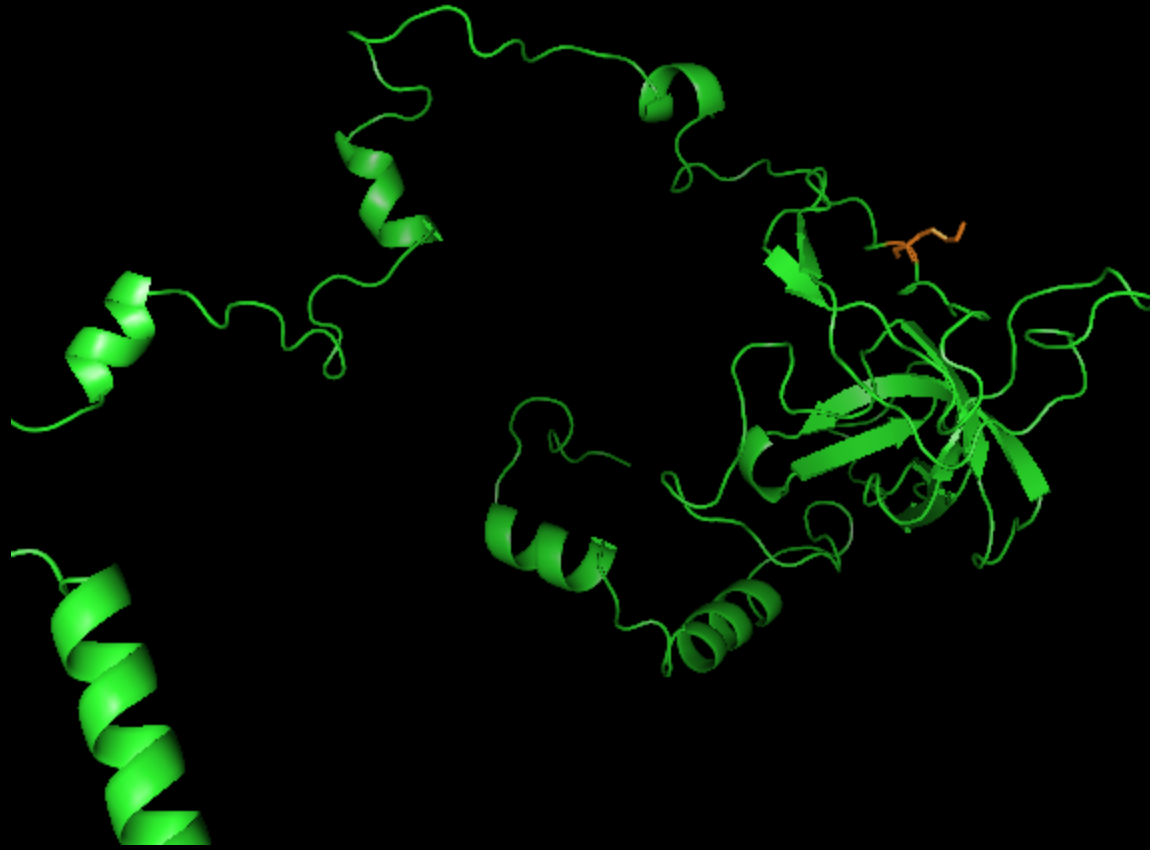

Supplement: NIHMS820798-supplement-Supplementary_Figure_4.pdf [file NIHMS820798-supplement-Supplementary_Figure_4.pdf]
