# Supplementary material
Source: PubMed Central journal article supplement (PMC5148652)
Supplement: NIHMS820798-supplement-Supplementary_Figure_1.pdf [file NIHMS820798-supplement-Supplementary_Figure_1.pdf]

# Cytoplasmic Ribosomal Fraction

MS1 Chromatograms and  
MS2 Fragmentation Patterns

# RPL23B

R.RRDGVFLYFEDNAGVIANPdi**KGEM**di**KGSAITGPVGK**.E [86, 119] (missed 3)

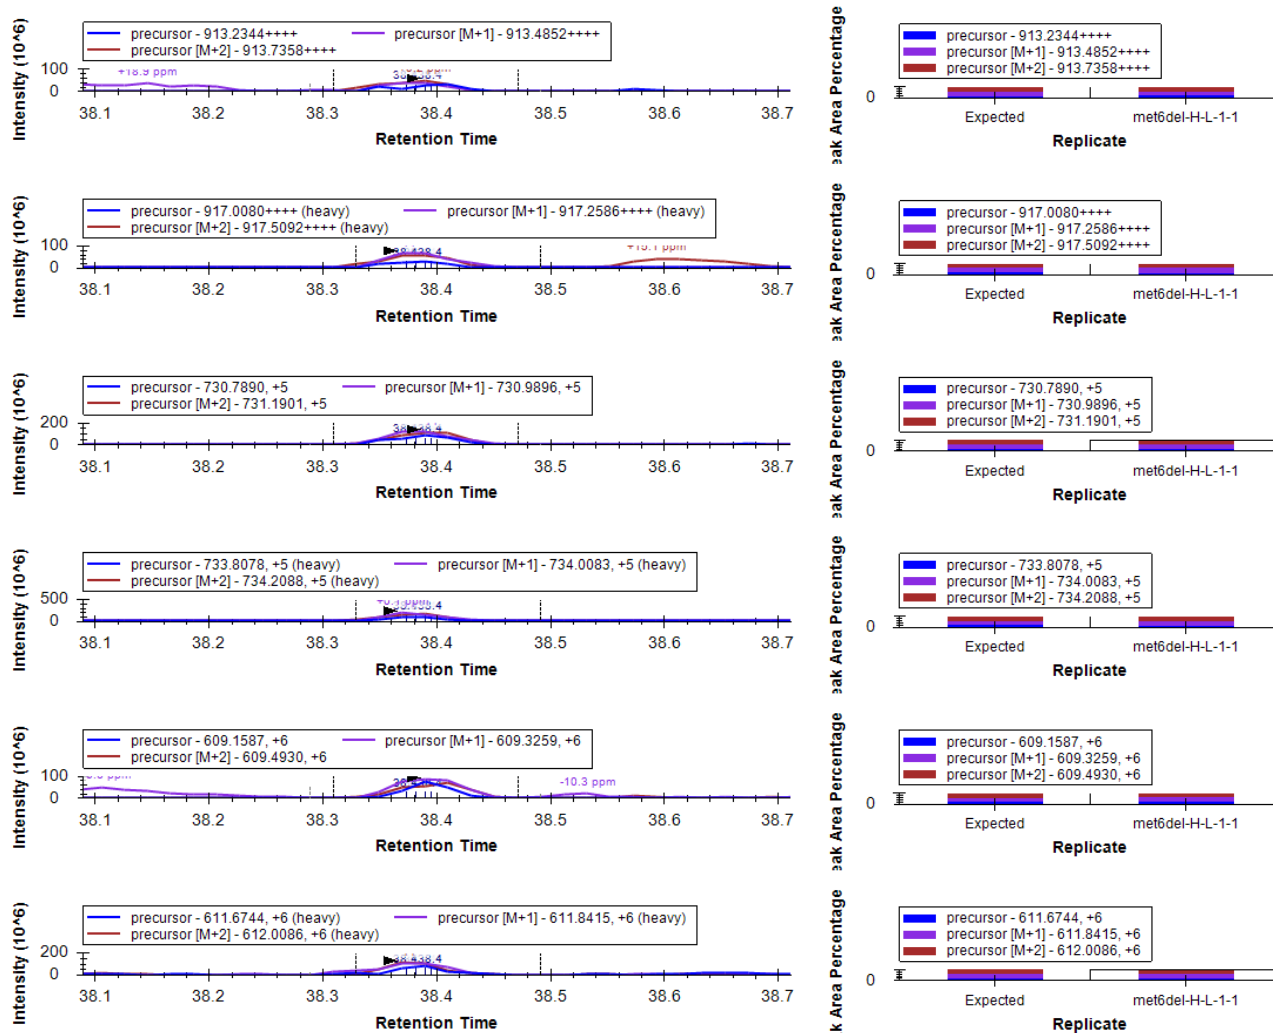

Replicate 1

# RPL23B

R.RRDGVFLYFEDNAGVIANPdi**KGEM**di**KGSAITGPV**GK.E [86, 119] (missed 3)

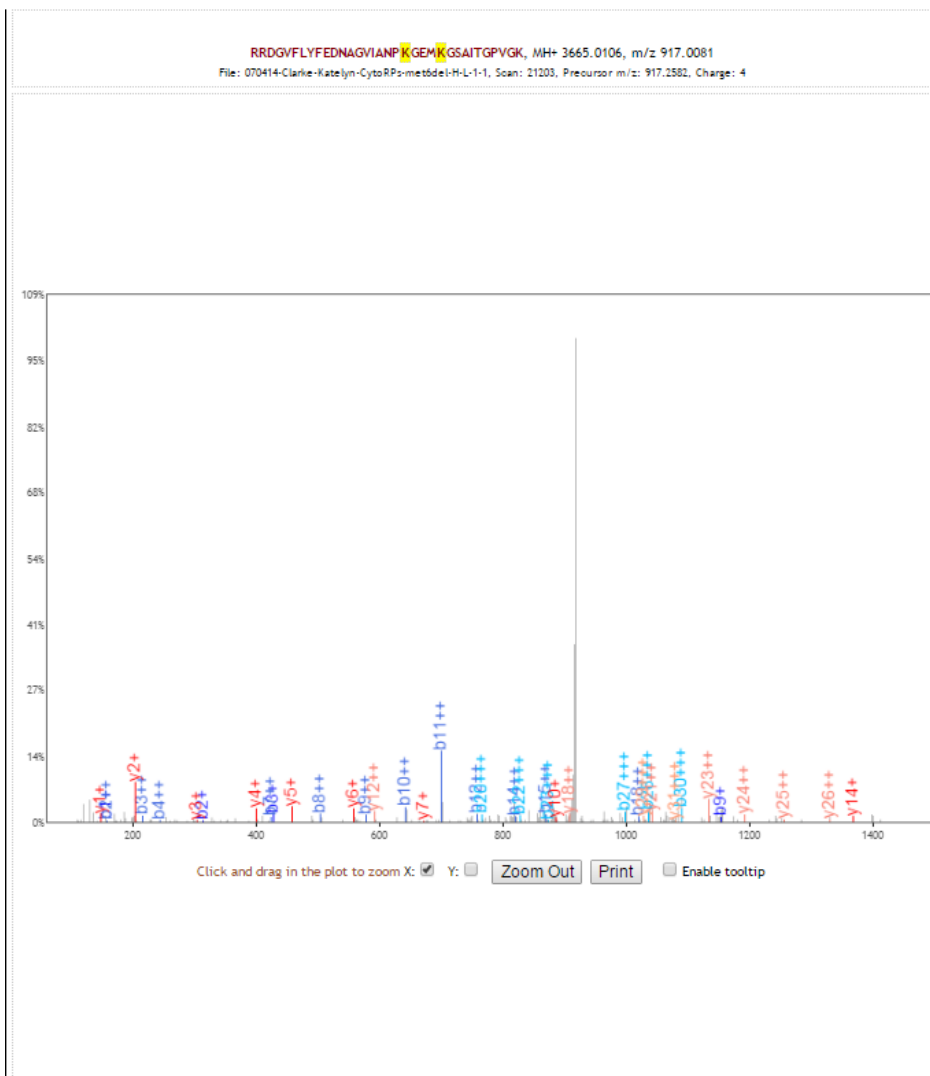

| b-        | b2+       | b3+       | #  | Seq | #  | y+        | y2+       | y3+       |
|-----------|-----------|-----------|----|-----|----|-----------|-----------|-----------|
| 157.1084  | 79.0578   | 53.0410   | 1  | R   | 34 |           |           |           |
| 313.2095  | 157.1084  | 105.0747  | 2  | R   | 33 | 3508.9095 | 1754.9584 | 1170.3080 |
| 428.2364  | 214.6219  | 143.4170  | 3  | D   | 32 | 3352.8084 | 1676.9078 | 1118.2743 |
| 485.2579  | 243.1326  | 162.4242  | 4  | G   | 31 | 3237.7814 | 1619.3944 | 1079.9320 |
| 584.3263  | 292.6668  | 195.4470  | 5  | V   | 30 | 3180.7600 | 1590.8836 | 1060.9248 |
| 731.3947  | 366.2010  | 244.4698  | 6  | F   | 29 | 3081.6916 | 1541.3494 | 1027.9020 |
| 844.4788  | 422.7430  | 282.1644  | 7  | L   | 28 | 2934.6232 | 1467.8152 | 978.8792  |
| 1007.5421 | 504.2747  | 336.5189  | 8  | Y   | 27 | 2821.5391 | 1411.2732 | 941.1845  |
| 1154.6105 | 577.8089  | 385.5417  | 9  | F   | 26 | 2658.4758 | 1329.7415 | 886.8301  |
| 1283.6531 | 642.3302  | 428.5559  | 10 | E   | 25 | 2511.4073 | 1256.2073 | 837.8073  |
| 1398.6801 | 699.8437  | 466.8982  | 11 | D   | 24 | 2382.3648 | 1191.6860 | 794.7931  |
| 1512.7230 | 756.8651  | 504.9125  | 12 | N   | 23 | 2267.3378 | 1134.1725 | 756.4508  |
| 1583.7601 | 792.3837  | 528.5916  | 13 | A   | 22 | 2153.2949 | 1077.1511 | 718.4365  |
| 1640.7816 | 820.8944  | 547.5987  | 14 | G   | 21 | 2082.2578 | 1041.6325 | 694.7574  |
| 1739.8500 | 870.4286  | 580.6215  | 15 | V   | 20 | 2025.2363 | 1013.1218 | 675.7503  |
| 1852.9341 | 926.9707  | 618.3162  | 16 | I   | 19 | 1926.1679 | 963.5876  | 642.7275  |
| 1923.9712 | 962.4892  | 641.9952  | 17 | A   | 18 | 1813.0838 | 907.0456  | 605.0328  |
| 2038.0141 | 1019.5107 | 680.0096  | 18 | N   | 17 | 1742.0467 | 871.5270  | 581.3538  |
| 2135.0669 | 1068.0371 | 712.3605  | 19 | P   | 16 | 1628.0038 | 814.5055  | 543.3394  |
| 2297.2310 | 1149.1192 | 766.4152  | 20 | K   | 15 | 1530.9510 | 765.9792  | 510.9885  |
| 2354.2525 | 1177.6299 | 785.4223  | 21 | G   | 14 | 1368.7869 | 684.8971  | 456.9338  |
| 2483.2951 | 1242.1512 | 828.4365  | 22 | E   | 13 | 1311.7654 | 656.3863  | 437.9267  |
| 2617.3545 | 1309.1809 | 873.1230  | 23 | M   | 12 | 1182.7228 | 591.8650  | 394.9125  |
| 2779.5186 | 1390.2630 | 927.1777  | 24 | K   | 11 | 1048.6634 | 524.8353  | 350.2260  |
| 2836.5401 | 1418.7737 | 946.1849  | 25 | G   | 10 | 886.4993  | 443.7533  | 296.1713  |
| 2923.5721 | 1462.2897 | 975.1956  | 26 | S   | 9  | 829.4758  | 415.2425  | 277.1641  |
| 2994.6092 | 1497.8083 | 998.8746  | 27 | A   | 8  | 742.4458  | 371.7265  | 248.1534  |
| 3107.6933 | 1554.3503 | 1036.5693 | 28 | I   | 7  | 671.4087  | 336.2080  | 224.4744  |
| 3208.7410 | 1604.8741 | 1070.2518 | 29 | T   | 6  | 558.3246  | 279.6659  | 186.7797  |
| 3265.7624 | 1633.3849 | 1089.2590 | 30 | G   | 5  | 457.2769  | 229.1421  | 153.0972  |
| 3362.8152 | 1681.9112 | 1121.6099 | 31 | P   | 4  | 400.2554  | 200.6314  | 134.0900  |
| 3461.8836 | 1731.4454 | 1154.6327 | 32 | V   | 3  | 303.2027  | 152.1050  | 101.7391  |
| 3518.9051 | 1759.9562 | 1173.6399 | 33 | G   | 2  | 204.1343  | 102.5708  | 68.7163   |
|           |           |           | 34 | K   | 1  | 147.1128  | 74.0600   | 49.7091   |

[Ctrl] to move table

Static Modifications:  
C: 57.02146  
M: 3.0189

Variable Modifications:  
K: 34.0692

Replicate 1



# RPL23B

R.RRDGVFLYFEDNAGVIANPdi**KGEM**di**KGSAITGPV**GK.E [86, 119] (missed 3)

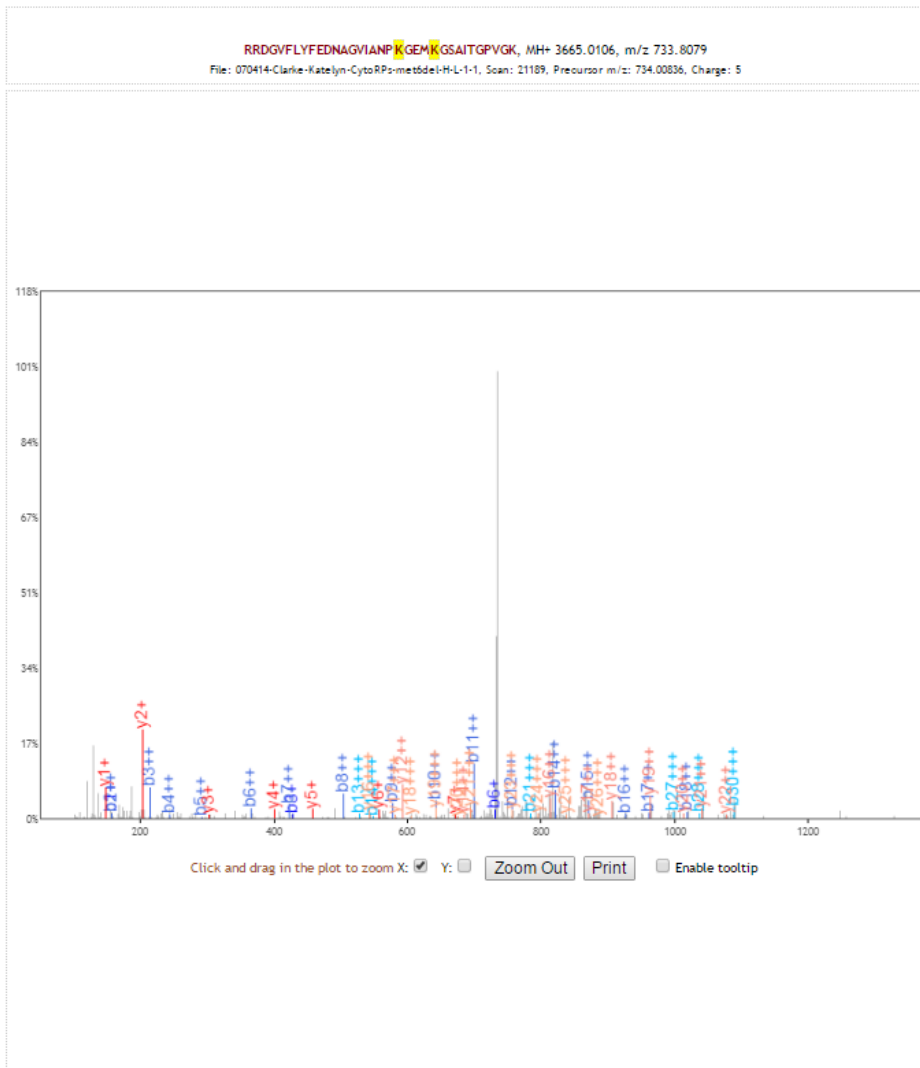

| b-              | b2-              | b3-              | #  | Seq #       | y-              | y2-              | y3-             |
|-----------------|------------------|------------------|----|-------------|-----------------|------------------|-----------------|
| <b>157.1084</b> | 79.0578          | 53.0410          | 1  | R 34        |                 |                  |                 |
| 313.2095        | <b>157.1084</b>  | 105.0747         | 2  | R 33        | 3508.9095       | 1754.9584        | 1170.3080       |
| <b>428.2364</b> | <b>214.6219</b>  | 143.4170         | 3  | D 32        | 3352.8084       | 1676.9078        | 1118.2743       |
| 485.2579        | <b>243.1326</b>  | 162.4242         | 4  | G 31        | 3237.7814       | 1619.3944        | 1079.9320       |
| 584.3263        | <b>292.6668</b>  | 195.4470         | 5  | V 30        | 3180.7600       | 1590.8836        | 1060.9248       |
| <b>731.3947</b> | <b>366.2010</b>  | 244.4698         | 6  | F 29        | 3081.6916       | 1541.3494        | 1027.9020       |
| 844.4788        | <b>422.7430</b>  | 282.1644         | 7  | L 28        | 2934.6232       | 1467.8152        | 978.8792        |
| 1007.5421       | <b>504.2747</b>  | 336.5189         | 8  | Y 27        | 2821.5391       | 1411.2732        | 941.1845        |
| 1154.6105       | <b>577.8089</b>  | 385.5417         | 9  | F 26        | 2658.4758       | 1329.7415        | <b>886.8301</b> |
| 1283.6531       | <b>642.3302</b>  | 428.5559         | 10 | E 25        | 2511.4073       | 1256.2073        | <b>837.8073</b> |
| 1396.6801       | <b>699.8437</b>  | 466.8982         | 11 | D 24        | 2382.3648       | 1191.6860        | <b>794.7931</b> |
| 1512.7230       | <b>756.8651</b>  | 504.9125         | 12 | N 23        | 2267.3378       | 1134.1725        | <b>756.4508</b> |
| 1583.7601       | 792.3837         | <b>528.5916</b>  | 13 | A 22        | 2153.2949       | <b>1077.1511</b> | 718.4365        |
| 1640.7816       | <b>820.8944</b>  | <b>547.5987</b>  | 14 | G 21        | 2082.2578       | <b>1041.6325</b> | <b>694.7574</b> |
| 1739.8500       | <b>870.4286</b>  | 580.6215         | 15 | V 20        | 2025.2363       | <b>1013.1218</b> | <b>675.7503</b> |
| 1852.9341       | <b>926.9707</b>  | 618.3162         | 16 | I 19        | 1926.1679       | <b>963.5876</b>  | <b>642.7275</b> |
| 1923.9712       | <b>962.4892</b>  | 641.9952         | 17 | A 18        | 1813.0838       | <b>907.0456</b>  | <b>605.0328</b> |
| 2038.0141       | <b>1019.5107</b> | 680.0096         | 18 | N 17        | 1742.0467       | <b>871.5270</b>  | <b>581.3538</b> |
| 2135.0669       | 1068.0371        | 712.3605         | 19 | P 16        | 1628.0038       | <b>814.5055</b>  | <b>543.3394</b> |
| 2297.2310       | 1149.1192        | 766.4152         | 20 | <b>K</b> 15 | 1530.9510       | 765.9792         | 510.9885        |
| 2354.2525       | 1177.6299        | <b>785.4223</b>  | 21 | G 14        | 1368.7869       | <b>684.8971</b>  | 456.9338        |
| 2483.2951       | 1242.1512        | 828.4365         | 22 | E 13        | 1311.7654       | 656.3863         | 437.9267        |
| 2617.3545       | 1309.1809        | 873.1230         | 23 | M 12        | 1182.7228       | <b>591.8650</b>  | 394.9125        |
| 2779.5186       | 1390.2630        | 927.1777         | 24 | <b>K</b> 11 | 1048.6634       | 524.8353         | 350.2260        |
| 2836.5401       | 1418.7737        | 946.1849         | 25 | G 10        | 886.4993        | 443.7533         | 296.1713        |
| 2923.5721       | 1462.2897        | 975.1956         | 26 | S 9         | 829.4778        | 415.2425         | 277.1641        |
| 2994.6092       | 1497.8083        | <b>998.8746</b>  | 27 | A 8         | 742.4458        | 371.7265         | 248.1534        |
| 3107.6933       | 1554.3503        | <b>1036.5693</b> | 28 | I 7         | <b>671.4087</b> | 336.2080         | 224.4744        |
| 3208.7410       | 1604.8741        | 1070.2518        | 29 | T 6         | <b>558.3246</b> | 279.6659         | 186.7797        |
| 3265.7624       | 1633.3849        | <b>1089.2590</b> | 30 | G 5         | <b>457.2769</b> | 229.1421         | 153.0972        |
| 3362.8152       | 1681.9112        | 1121.6099        | 31 | P 4         | <b>400.2554</b> | 200.6314         | 134.0900        |
| 3461.8836       | 1731.4454        | 1154.6327        | 32 | V 3         | <b>303.2027</b> | 152.1050         | 101.7391        |
| 3518.9051       | 1759.9562        | 1173.6399        | 33 | G 2         | <b>204.1343</b> | 102.5708         | 68.7163         |
|                 |                  |                  | 34 | <b>K</b> 1  | <b>147.1128</b> | 74.0600          | 49.7091         |

[Click](#) to move table  
 Static Modifications:  
 C: 57.02146  
 M: 3.0189  
 Variable Modifications:  
 K: 34.0692

# RPL23B

R.RRDGVFLYFEDNAGVIANPdi**KGEM**di**KGSAITGPV**GK.E [86, 119] (missed 3)

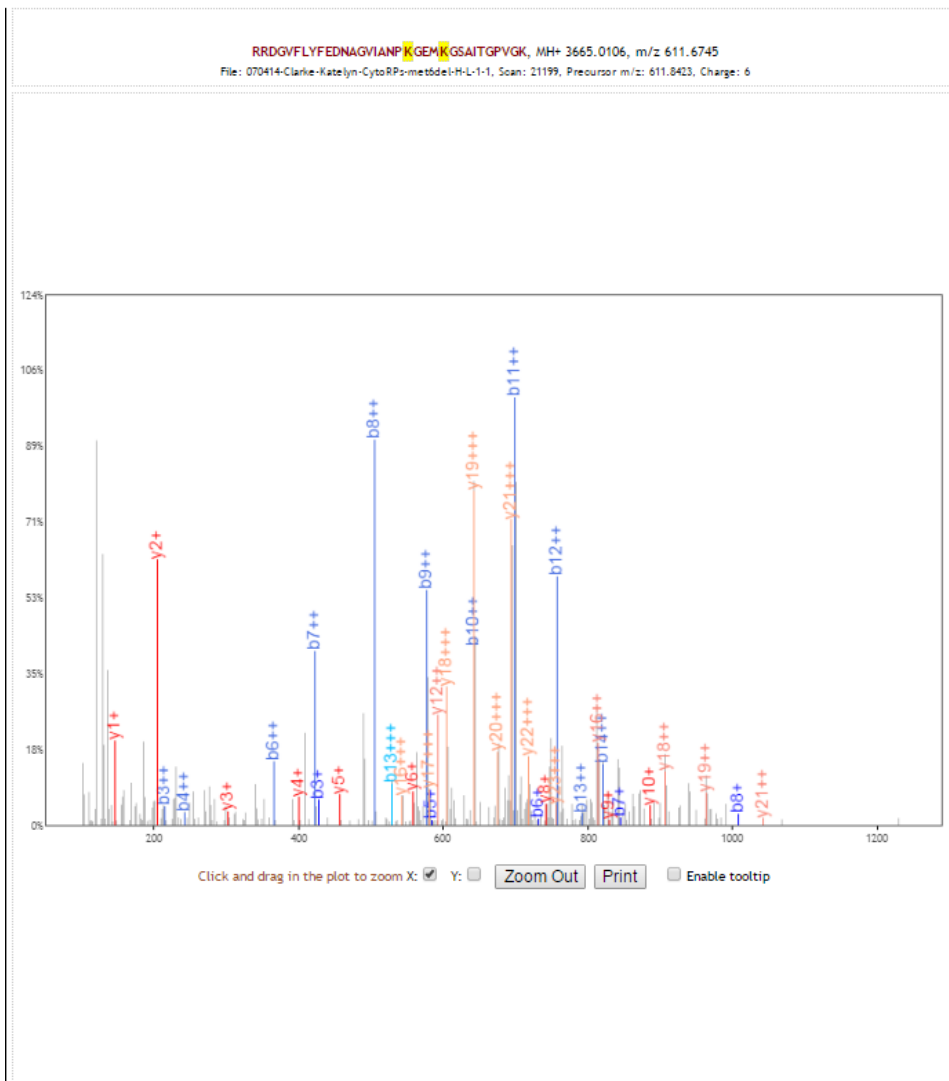

| b+               | b2+             | b3+             | #  | Seq #       | y+              | y2+              | y3+             |
|------------------|-----------------|-----------------|----|-------------|-----------------|------------------|-----------------|
| 157.1084         | 79.0578         | 53.0410         | 1  | R 34        |                 |                  |                 |
| 313.2095         | 157.1084        | 105.0747        | 2  | R 33        | 3508.9095       | 1754.9584        | 1170.3080       |
| <b>428.2364</b>  | <b>214.6219</b> | 143.4170        | 3  | D 32        | 3352.8084       | 1676.9078        | 1118.2743       |
| 485.2579         | 243.1326        | 162.4242        | 4  | G 31        | 3237.7814       | 1619.3944        | 1079.9320       |
| <b>584.3263</b>  | 292.6668        | 195.4470        | 5  | V 30        | 3180.7600       | 1590.8836        | 1060.9248       |
| <b>731.3947</b>  | <b>366.2010</b> | 244.4698        | 6  | F 29        | 3081.6916       | 1541.3494        | 1027.9020       |
| <b>844.4788</b>  | <b>422.7430</b> | 282.1644        | 7  | L 28        | 2934.6232       | 1467.8152        | 978.8792        |
| <b>1007.5421</b> | <b>504.2747</b> | 336.5189        | 8  | Y 27        | 2821.5391       | 1411.2732        | 941.1845        |
| 1154.6105        | <b>577.8089</b> | 385.5417        | 9  | F 26        | 2658.4758       | 1329.7415        | 886.8301        |
| 1283.6531        | <b>642.3302</b> | 428.5559        | 10 | E 25        | 2511.4073       | 1256.2073        | 837.8073        |
| 1398.6801        | <b>699.8437</b> | 466.8982        | 11 | D 24        | 2382.3648       | 1191.6860        | 794.7931        |
| 1512.7230        | <b>756.8651</b> | 504.9125        | 12 | N 23        | 2267.3378       | 1134.1725        | <b>756.4508</b> |
| 1583.7601        | <b>792.3837</b> | <b>528.5916</b> | 13 | A 22        | 2153.2949       | 1077.1511        | <b>718.4365</b> |
| 1640.7816        | <b>820.8944</b> | 547.5987        | 14 | G 21        | 2082.2578       | <b>1041.6325</b> | <b>694.7574</b> |
| 1739.8500        | 870.4286        | 580.6215        | 15 | V 20        | 2025.2363       | 1013.1218        | <b>675.7503</b> |
| 1852.9341        | 926.9707        | 618.3162        | 16 | I 19        | 1926.1679       | <b>963.5876</b>  | <b>642.7275</b> |
| 1923.9712        | 962.4892        | 641.9952        | 17 | A 18        | 1813.0838       | <b>907.0456</b>  | <b>605.0328</b> |
| 2038.0141        | 1019.5107       | 680.0096        | 18 | N 17        | 1742.0467       | 871.5270         | <b>581.3538</b> |
| 2135.0669        | 1068.0371       | 712.3605        | 19 | P 16        | 1628.0038       | <b>814.5055</b>  | <b>543.3394</b> |
| 2297.2310        | 1149.1192       | 766.4152        | 20 | <b>K</b> 15 | 1530.9510       | 765.9792         | 510.9885        |
| 2354.2525        | 1177.6299       | 785.4223        | 21 | G 14        | 1368.7869       | 684.8971         | 456.9338        |
| 2483.2951        | 1242.1512       | 828.4365        | 22 | E 13        | 1311.7654       | 656.3863         | 437.9267        |
| 2617.3545        | 1309.1809       | 873.1230        | 23 | <b>M</b> 12 | 1182.7228       | <b>591.8650</b>  | 394.9125        |
| 2779.5186        | 1390.2630       | 927.1777        | 24 | <b>K</b> 11 | 1048.6634       | 524.8353         | 350.2260        |
| 2836.5401        | 1418.7737       | 946.1849        | 25 | G 10        | <b>886.4993</b> | 443.7533         | 296.1713        |
| 2923.5721        | 1462.2897       | 975.1956        | 26 | S 9         | <b>829.4778</b> | 415.2425         | 277.1641        |
| 2994.6092        | 1497.8083       | 998.8746        | 27 | <b>A</b> 8  | <b>742.4458</b> | 371.7265         | 248.1534        |
| 3107.6933        | 1554.3503       | 1036.5693       | 28 | I 7         | 671.4087        | 336.2080         | 224.4744        |
| 3208.7410        | 1604.8741       | 1070.2518       | 29 | T 6         | <b>558.3246</b> | 279.6659         | 186.7797        |
| 3265.7624        | 1633.3849       | 1089.2590       | 30 | G 5         | <b>457.2769</b> | 229.1421         | 153.0972        |
| 3362.8152        | 1681.9112       | 1121.6099       | 31 | P 4         | <b>400.2554</b> | 200.6314         | 134.0900        |
| 3461.8836        | 1731.4454       | 1154.6327       | 32 | V 3         | <b>303.2027</b> | 152.1050         | 101.7391        |
| 3518.9051        | 1759.9562       | 1173.6399       | 33 | G 2         | <b>204.1343</b> | 102.5708         | 68.7163         |
|                  |                 |                 | 34 | <b>K</b> 1  | <b>147.1128</b> | 74.0600          | 49.7091         |

[\[Click\]](#) to move table

Static Modifications:  
 C: 57.02146  
 M: 3.0189

Variable Modifications:  
 K: 34.0692

# RPL23B

R.DGVFLYFEDNAGVIANPdi**KGEM**di**KGSAITGPV**GK.E [88, 119]  
(missed 2)

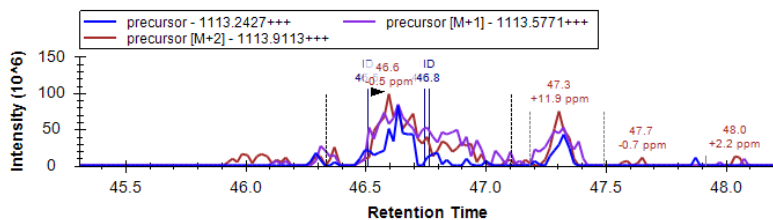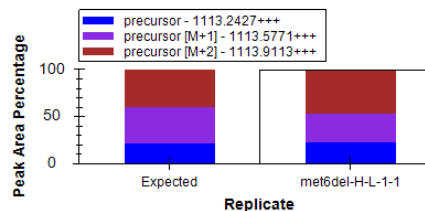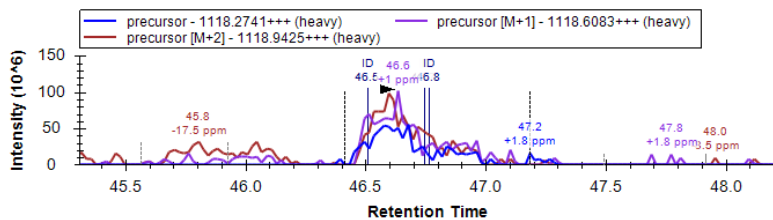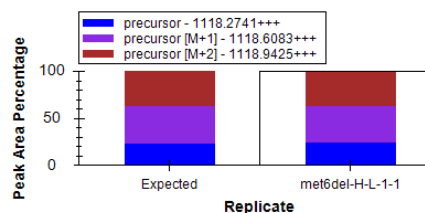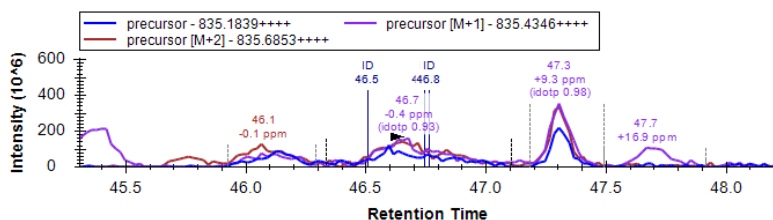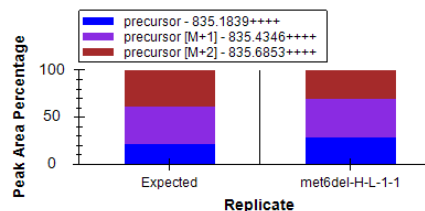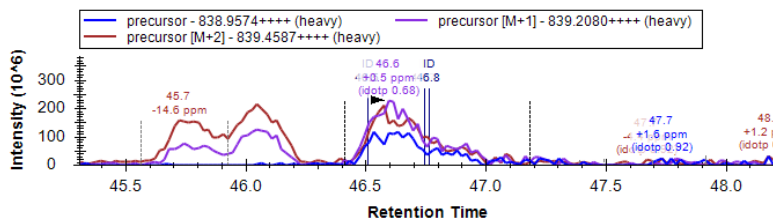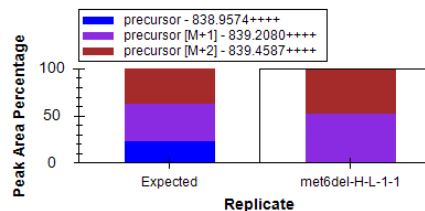

Replicate 1

# RPL23B

R.DGVFLYFEDNAGVIANPdi**K**GEMdi**K**GSAITGPVGK.E [88, 119]

(missed 2)

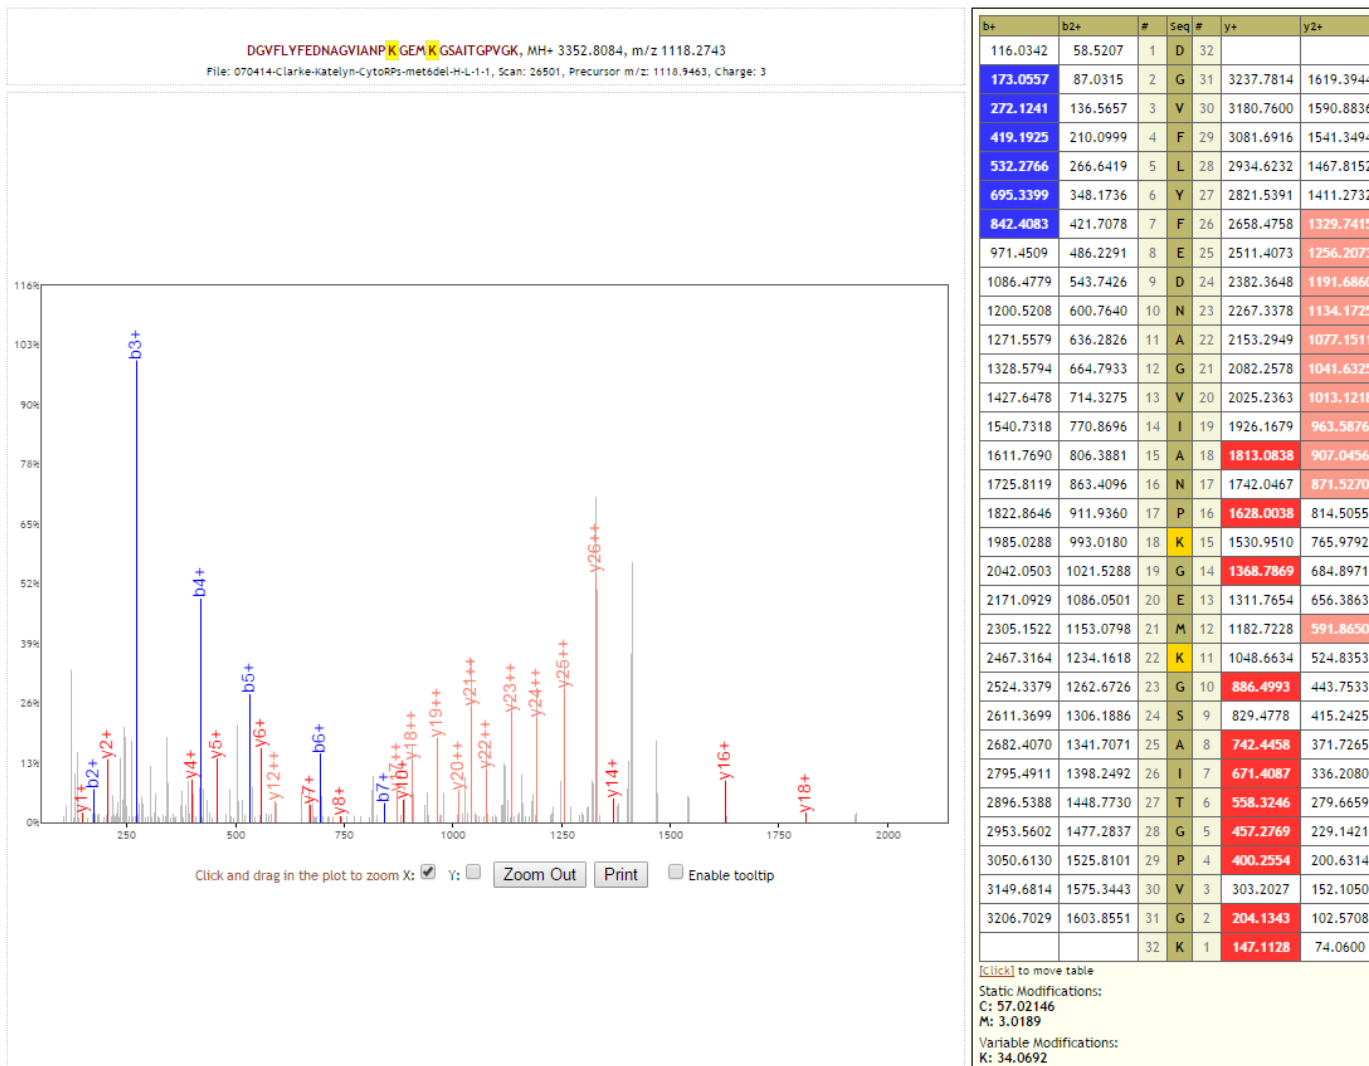

Replicate 1





# RPL23B

R.DGVFLYFEDNAGVIANPdi**K**GEMdi**K**GSAITGPVGK.E [88, 119]

(missed 2)

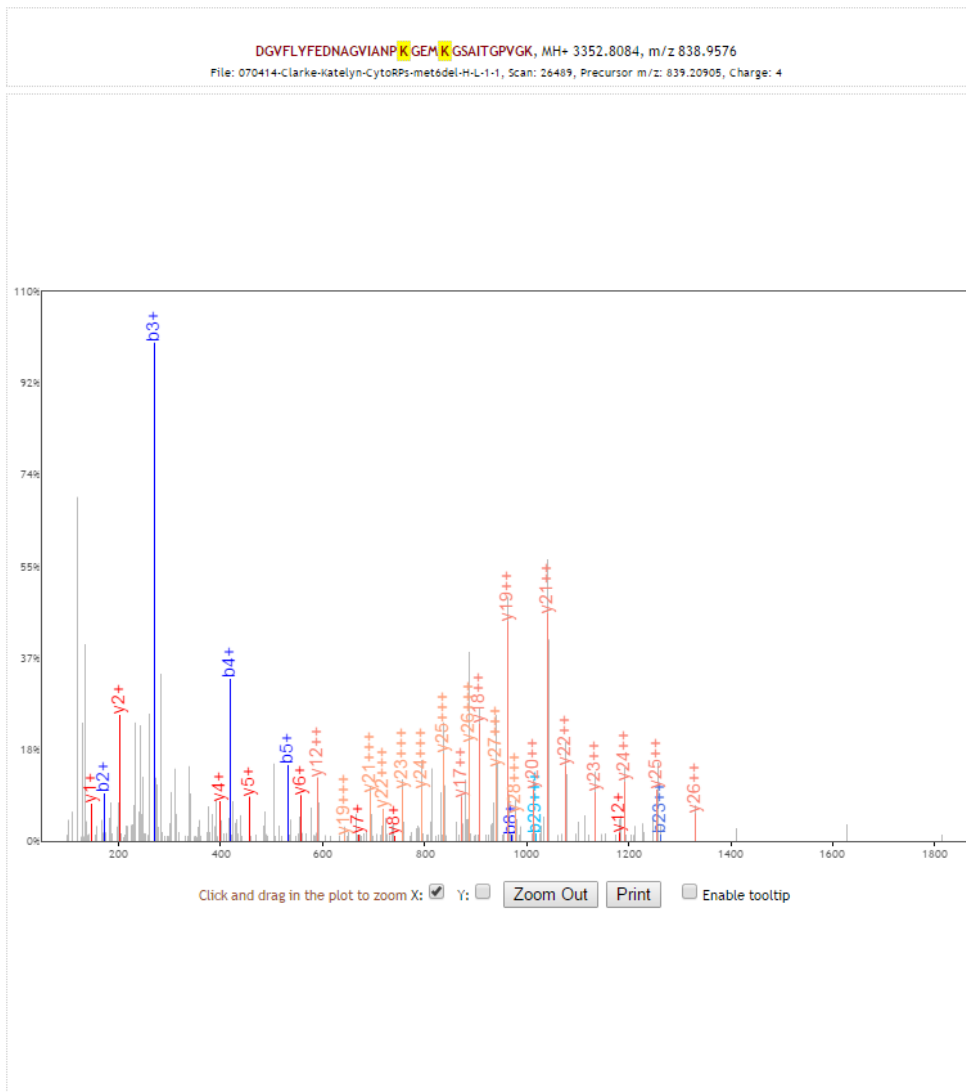

| b+        | b2+       | b3+       | #  | Seq # | y+        | y2+       | y3+       |
|-----------|-----------|-----------|----|-------|-----------|-----------|-----------|
| 116.0342  | 58.5207   | 39.3496   | 1  | D 32  |           |           |           |
| 173.0557  | 87.0315   | 58.3567   | 2  | G 31  | 3237.7814 | 1619.3944 | 1079.9320 |
| 272.1241  | 136.5657  | 91.3795   | 3  | V 30  | 3180.7600 | 1590.8836 | 1060.9248 |
| 419.1925  | 210.0999  | 140.4024  | 4  | F 29  | 3081.6916 | 1541.3494 | 1027.9020 |
| 532.2766  | 266.6419  | 178.0970  | 5  | L 28  | 2934.6232 | 1467.8152 | 978.8792  |
| 695.3399  | 348.1736  | 232.4515  | 6  | Y 27  | 2821.5391 | 1411.2732 | 941.1845  |
| 842.4083  | 421.7078  | 281.4743  | 7  | F 26  | 2658.4758 | 1329.7415 | 886.8301  |
| 971.4509  | 486.2291  | 324.4885  | 8  | E 25  | 2511.4073 | 1256.2073 | 837.8073  |
| 1086.4779 | 543.7426  | 362.8308  | 9  | D 24  | 2382.3648 | 1191.6860 | 794.7931  |
| 1200.5208 | 600.7640  | 400.8451  | 10 | N 23  | 2267.3378 | 1134.1725 | 756.4508  |
| 1271.5579 | 636.2826  | 424.5241  | 11 | A 22  | 2153.2949 | 1077.1511 | 718.4365  |
| 1328.5794 | 664.7933  | 443.5313  | 12 | G 21  | 2082.2578 | 1041.6325 | 694.7574  |
| 1427.6478 | 714.3275  | 476.5541  | 13 | V 20  | 2025.2363 | 1013.1218 | 675.7503  |
| 1540.7318 | 770.8696  | 514.2488  | 14 | I 19  | 1926.1679 | 963.5876  | 642.7275  |
| 1611.7690 | 806.3881  | 537.9278  | 15 | A 18  | 1813.0838 | 907.0456  | 605.0328  |
| 1725.8119 | 863.4096  | 575.9421  | 16 | N 17  | 1742.0467 | 871.5270  | 581.3538  |
| 1822.8646 | 911.9360  | 608.2931  | 17 | P 16  | 1628.0038 | 814.5055  | 543.3394  |
| 1985.0288 | 993.0180  | 662.3478  | 18 | K 15  | 1530.9510 | 765.9792  | 510.9885  |
| 2042.0503 | 1021.5288 | 681.3549  | 19 | G 14  | 1368.7869 | 684.8971  | 456.9338  |
| 2171.0929 | 1086.0501 | 724.3691  | 20 | E 13  | 1311.7654 | 656.3863  | 437.9267  |
| 2305.1522 | 1153.0798 | 769.0556  | 21 | M 12  | 1182.7228 | 591.8650  | 394.9125  |
| 2467.3164 | 1234.1618 | 823.1103  | 22 | K 11  | 1048.6634 | 524.8353  | 350.2260  |
| 2524.3379 | 1262.6726 | 842.1175  | 23 | G 10  | 886.4993  | 443.7533  | 296.1713  |
| 2611.3699 | 1306.1886 | 871.1282  | 24 | S 9   | 829.4778  | 415.2425  | 277.1641  |
| 2682.4070 | 1341.7071 | 894.8072  | 25 | A 8   | 742.4458  | 371.7265  | 248.1534  |
| 2795.4911 | 1398.2492 | 932.5019  | 26 | I 7   | 671.4087  | 336.2080  | 224.4744  |
| 2896.5388 | 1448.7730 | 966.1844  | 27 | T 6   | 558.3246  | 279.6659  | 186.7797  |
| 2953.5602 | 1477.2837 | 985.1916  | 28 | G 5   | 457.2769  | 229.1421  | 153.0972  |
| 3050.6130 | 1525.8101 | 1017.5425 | 29 | P 4   | 400.2554  | 200.6314  | 134.0900  |
| 3149.6814 | 1575.3443 | 1050.5653 | 30 | V 3   | 303.2027  | 152.1050  | 101.7391  |
| 3206.7029 | 1603.8551 | 1069.5725 | 31 | G 2   | 204.1343  | 102.5708  | 68.7163   |
|           |           |           | 32 | K 1   | 147.1128  | 74.0600   | 49.7091   |

[click] to move table  
 Static Modifications:  
 C: 57.02146  
 M: 3.0189  
 Variable Modifications:  
 K: 34.0692

# RPL23B

## R.DGVFLYFEDNAGVIANPdi**KGEM**di**KGSAITGPVGK**.E [88, 119] (missed 2)

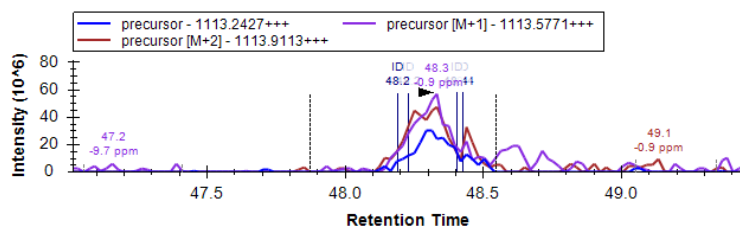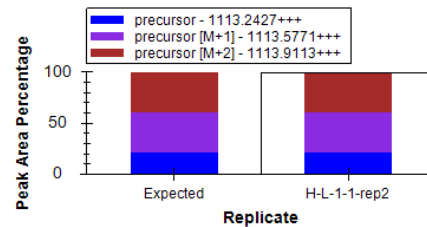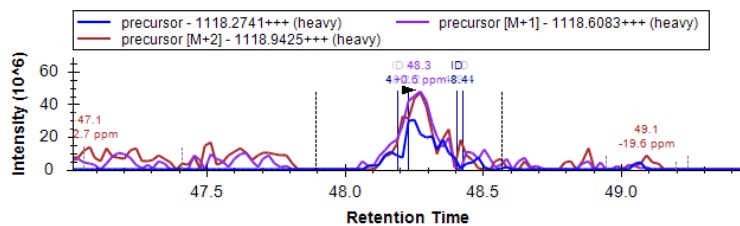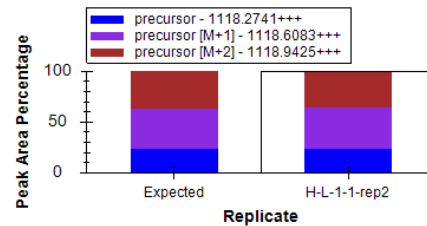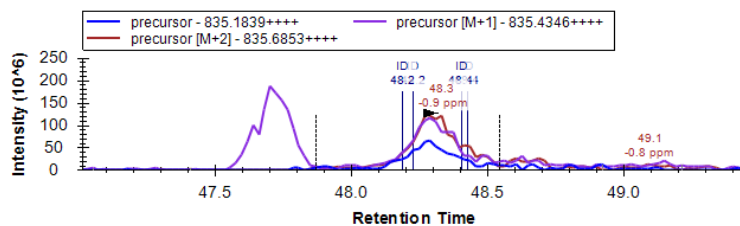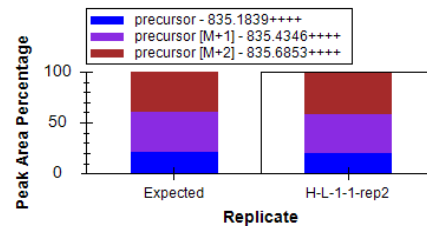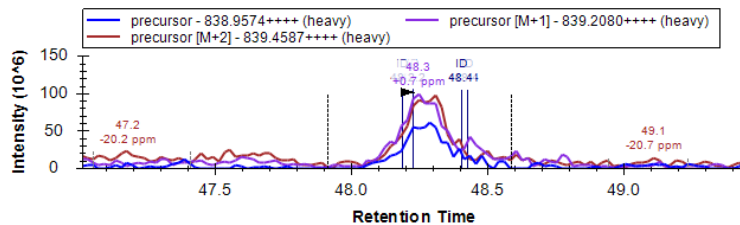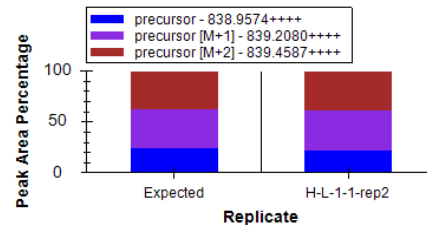

Replicate 2

# RPL23B

R.DGVFLYFEDNAGVIANPdi**K**GEMdi**K**GSAITGPVGK.E [88, 119]  
(missed 2)

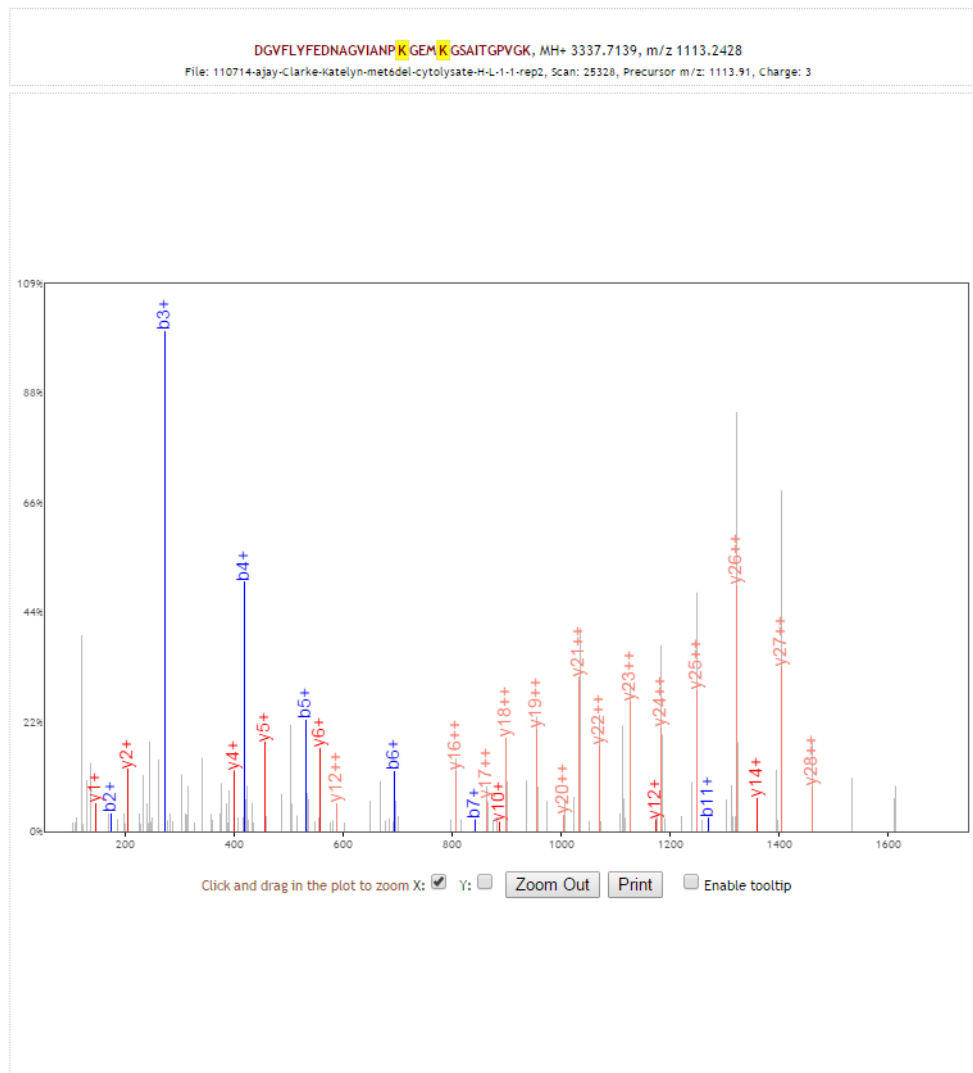

| b+        | b2+       | #  | Seq # | y+        | y2+       |
|-----------|-----------|----|-------|-----------|-----------|
| 116.0342  | 58.5207   | 1  | D 32  |           |           |
| 173.0557  | 87.0315   | 2  | G 31  | 3222.6869 | 1611.8471 |
| 272.1241  | 136.5657  | 3  | V 30  | 3165.6655 | 1583.3364 |
| 419.1925  | 210.0999  | 4  | F 29  | 3066.5971 | 1533.8022 |
| 532.2766  | 266.6419  | 5  | L 28  | 2919.5287 | 1460.2680 |
| 695.3399  | 348.1736  | 6  | Y 27  | 2806.4446 | 1403.7259 |
| 842.4083  | 421.7078  | 7  | F 26  | 2643.3813 | 1322.1943 |
| 971.4509  | 486.2291  | 8  | E 25  | 2496.3128 | 1248.6601 |
| 1086.4779 | 543.7426  | 9  | D 24  | 2367.2703 | 1184.1388 |
| 1200.5208 | 600.7640  | 10 | N 23  | 2252.2433 | 1126.6253 |
| 1271.5579 | 636.2826  | 11 | A 22  | 2138.2004 | 1069.6038 |
| 1328.5794 | 664.7933  | 12 | G 21  | 2067.1633 | 1034.0853 |
| 1427.6478 | 714.3275  | 13 | V 20  | 2010.1418 | 1005.5743 |
| 1540.7318 | 770.8696  | 14 | I 19  | 1911.0734 | 956.0403  |
| 1611.7690 | 806.3881  | 15 | A 18  | 1797.9893 | 899.4983  |
| 1725.8119 | 863.4096  | 16 | N 17  | 1726.9522 | 863.9797  |
| 1822.8646 | 911.9360  | 17 | P 16  | 1612.9093 | 806.9583  |
| 1978.9910 | 989.9991  | 18 | K 15  | 1515.8565 | 758.4319  |
| 2036.0125 | 1018.5099 | 19 | G 14  | 1359.7302 | 680.3687  |
| 2165.0551 | 1083.0312 | 20 | E 13  | 1302.7087 | 651.8580  |
| 2296.0955 | 1148.5514 | 21 | M 12  | 1173.6661 | 587.3367  |
| 2452.2219 | 1226.6146 | 22 | K 11  | 1042.6256 | 521.8164  |
| 2509.2434 | 1255.1253 | 23 | G 10  | 886.4993  | 443.7533  |
| 2596.2754 | 1298.6413 | 24 | S 9   | 829.4778  | 415.2425  |
| 2667.3125 | 1334.1599 | 25 | A 8   | 742.4458  | 371.7265  |
| 2780.3966 | 1390.7019 | 26 | I 7   | 671.4087  | 336.2080  |
| 2881.4443 | 1441.2258 | 27 | T 6   | 558.3246  | 279.6659  |
| 2938.4657 | 1469.7365 | 28 | G 5   | 457.2769  | 229.1421  |
| 3035.5185 | 1518.2629 | 29 | P 4   | 400.2554  | 200.6314  |
| 3134.5869 | 1567.7971 | 30 | V 3   | 303.2027  | 152.1050  |
| 3191.6084 | 1596.3078 | 31 | G 2   | 204.1343  | 102.5708  |
|           |           | 32 | K 1   | 147.1128  | 74.0600   |

[\[Click\]](#) to move table  
Static Modifications:  
C: 57.02146  
Variable Modifications:  
K: 28.0314

# RPL23B

R.DGVFLYFEDNAGVIANPdi**K**GEMdi**K**GSAITGPVGK.E [88, 119]  
(missed 2)

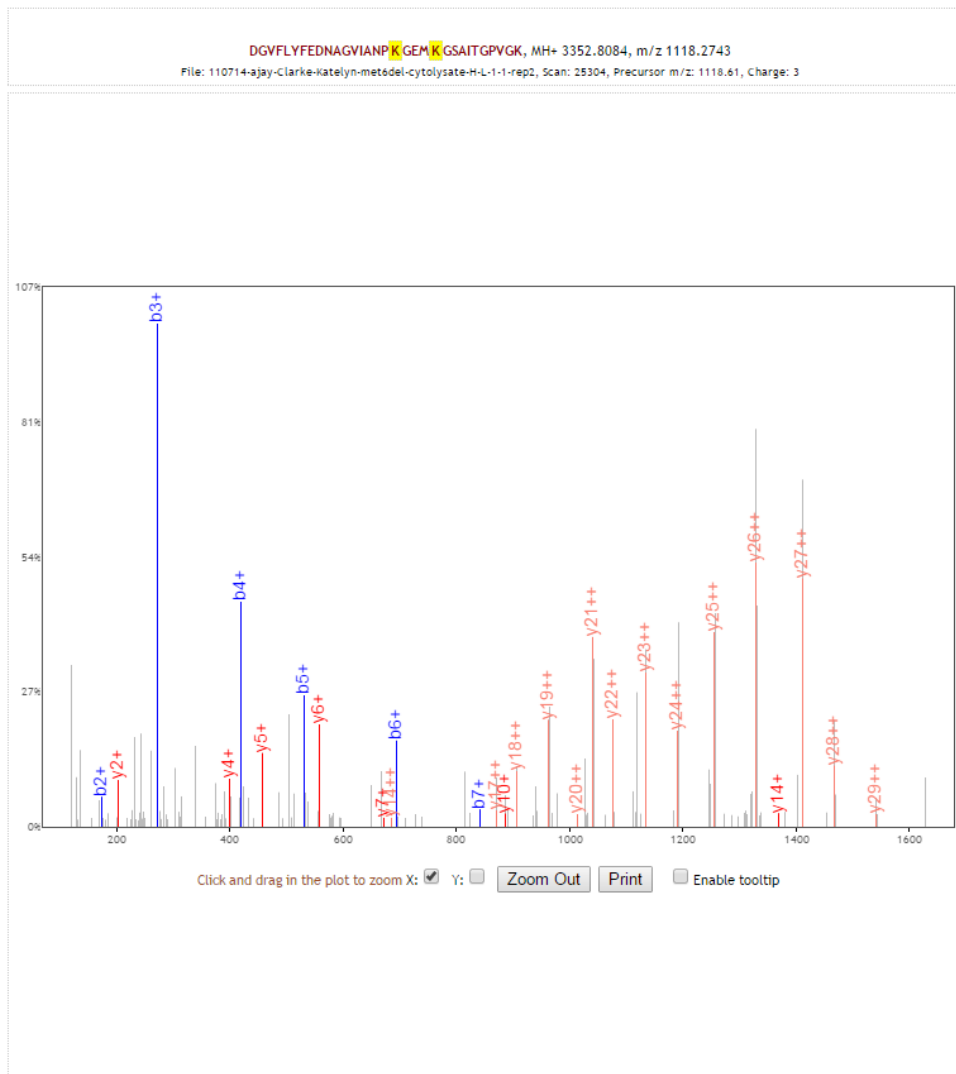

| b+        | b2+       | #  | Seq | #  | y+        | y2+       |
|-----------|-----------|----|-----|----|-----------|-----------|
| 116.0342  | 58.5207   | 1  | D   | 32 |           |           |
| 173.0557  | 87.0315   | 2  | G   | 31 | 3237.7814 | 1619.3944 |
| 272.1241  | 136.5657  | 3  | V   | 30 | 3180.7600 | 1590.8836 |
| 419.1925  | 210.0999  | 4  | F   | 29 | 3081.6916 | 1541.3494 |
| 532.2766  | 266.6419  | 5  | L   | 28 | 2934.6232 | 1467.8152 |
| 695.3399  | 348.1736  | 6  | Y   | 27 | 2821.5391 | 1411.2732 |
| 842.4083  | 421.7078  | 7  | F   | 26 | 2658.4758 | 1329.7415 |
| 971.4509  | 486.2291  | 8  | E   | 25 | 2511.4073 | 1256.2073 |
| 1086.4779 | 543.7426  | 9  | D   | 24 | 2382.3648 | 1191.6860 |
| 1200.5208 | 600.7640  | 10 | N   | 23 | 2267.3378 | 1134.1725 |
| 1271.5579 | 636.2826  | 11 | A   | 22 | 2153.2949 | 1077.1511 |
| 1328.5794 | 664.7933  | 12 | G   | 21 | 2082.2578 | 1041.6325 |
| 1427.6478 | 714.3275  | 13 | V   | 20 | 2025.2363 | 1013.1218 |
| 1540.7318 | 770.8696  | 14 | I   | 19 | 1926.1679 | 963.5876  |
| 1611.7690 | 806.3881  | 15 | A   | 18 | 1813.0838 | 907.0456  |
| 1725.8119 | 863.4096  | 16 | N   | 17 | 1742.0467 | 871.5270  |
| 1822.8646 | 911.9360  | 17 | P   | 16 | 1628.0038 | 814.5055  |
| 1985.0288 | 993.0180  | 18 | K   | 15 | 1530.9510 | 765.9792  |
| 2042.0503 | 1021.5288 | 19 | G   | 14 | 1368.7869 | 684.8971  |
| 2171.0929 | 1086.0501 | 20 | E   | 13 | 1311.7654 | 656.3863  |
| 2305.1522 | 1153.0798 | 21 | M   | 12 | 1182.7228 | 591.8650  |
| 2467.3164 | 1234.1618 | 22 | K   | 11 | 1048.6634 | 524.8353  |
| 2524.3379 | 1262.6726 | 23 | G   | 10 | 886.4993  | 443.7533  |
| 2611.3699 | 1306.1886 | 24 | S   | 9  | 829.4778  | 415.2425  |
| 2682.4070 | 1341.7071 | 25 | A   | 8  | 742.4458  | 371.7265  |
| 2795.4911 | 1398.2492 | 26 | I   | 7  | 671.4087  | 336.2080  |
| 2896.5388 | 1448.7730 | 27 | T   | 6  | 558.3246  | 279.6659  |
| 2953.5602 | 1477.2837 | 28 | G   | 5  | 457.2769  | 229.1421  |
| 3050.6130 | 1525.8101 | 29 | P   | 4  | 400.2554  | 200.6314  |
| 3149.6814 | 1575.3443 | 30 | V   | 3  | 303.2027  | 152.1050  |
| 3206.7029 | 1603.8551 | 31 | G   | 2  | 204.1343  | 102.5708  |
|           |           | 32 | K   | 1  | 147.1128  | 74.0600   |

[\[Click\]](#) to move table

Static Modifications:  
C: 57.02146  
M: 3.0189

Variable Modifications:  
K: 34.0692

# RPL23B

R.DGVFLYFEDNAGVIANPdi**K**GEMdi**K**GSAITGPVGK.E [88, 119]

(missed 2)

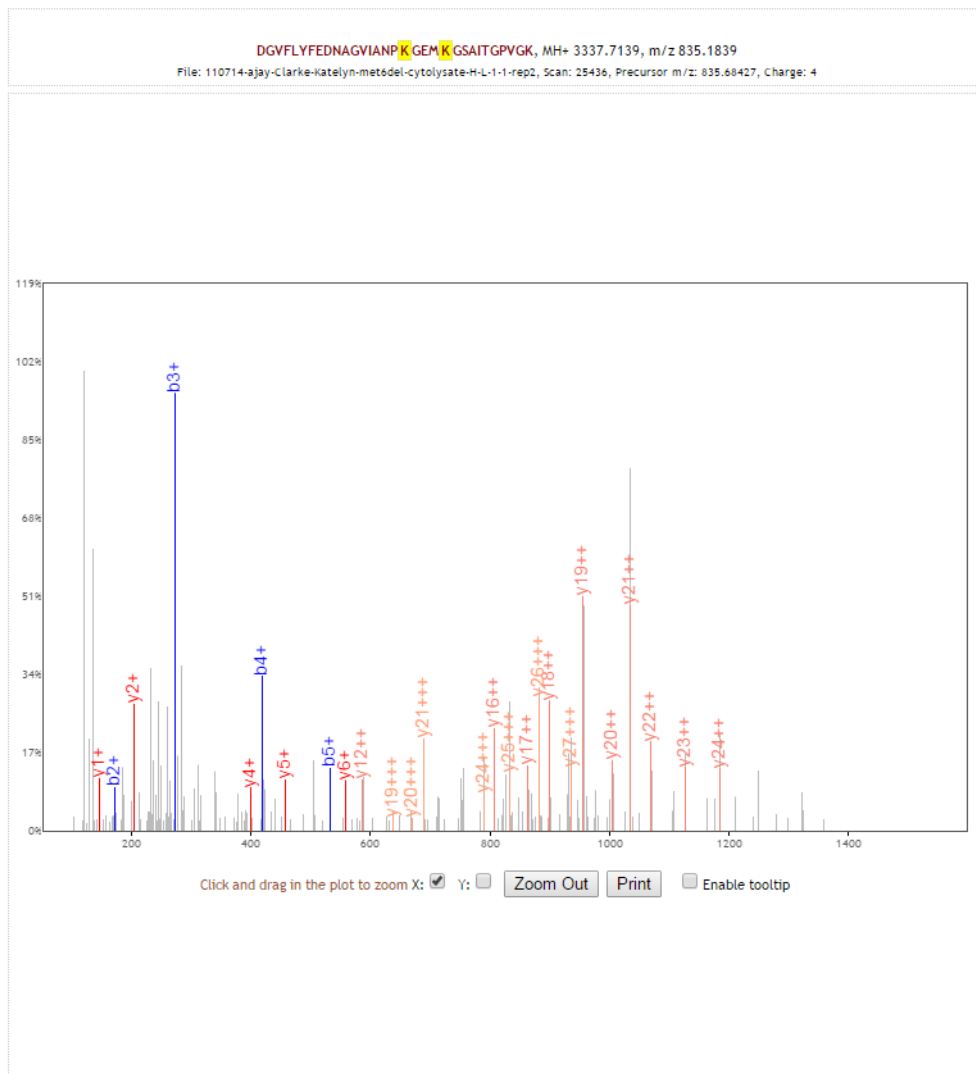

| b+              | b2+       | b3+       | #  | Seq #       | y+              | y2+              | y3+             |
|-----------------|-----------|-----------|----|-------------|-----------------|------------------|-----------------|
| 116.0342        | 58.5207   | 39.3496   | 1  | D 32        |                 |                  |                 |
| <b>173.0557</b> | 87.0315   | 58.3567   | 2  | G 31        | 3222.6869       | 1611.8471        | 1074.9005       |
| <b>272.1241</b> | 136.5657  | 91.3795   | 3  | V 30        | 3165.6655       | 1583.3364        | 1055.8933       |
| <b>419.1925</b> | 210.0999  | 140.4024  | 4  | F 29        | 3066.5971       | 1533.8022        | 1022.8705       |
| <b>532.2766</b> | 266.6419  | 178.0970  | 5  | L 28        | 2919.5287       | 1460.2680        | 973.8477        |
| 695.3399        | 348.1736  | 232.4515  | 6  | Y 27        | 2806.4446       | 1403.7259        | <b>936.1530</b> |
| 842.4083        | 421.7078  | 281.4743  | 7  | F 26        | 2643.3813       | 1322.1943        | <b>881.7986</b> |
| 971.4509        | 486.2291  | 324.4885  | 8  | E 25        | 2496.3128       | 1248.6601        | <b>832.7758</b> |
| 1086.4779       | 543.7426  | 362.8308  | 9  | D 24        | 2367.2703       | <b>1184.1388</b> | <b>789.7616</b> |
| 1200.5208       | 600.7640  | 400.8451  | 10 | N 23        | 2252.2433       | <b>1126.6253</b> | 751.4193        |
| 1271.5579       | 636.2826  | 424.5241  | 11 | A 22        | 2138.2004       | <b>1069.6038</b> | 713.4050        |
| 1328.5794       | 664.7933  | 443.5313  | 12 | G 21        | 2067.1633       | <b>1034.0853</b> | <b>689.7259</b> |
| 1427.6478       | 714.3275  | 476.5541  | 13 | V 20        | 2010.1418       | <b>1005.5745</b> | <b>670.7188</b> |
| 1540.7318       | 770.8696  | 514.2488  | 14 | I 19        | 1911.0734       | <b>956.0403</b>  | <b>637.6960</b> |
| 1611.7690       | 806.3881  | 537.9278  | 15 | A 18        | 1797.9893       | <b>899.4983</b>  | 600.0013        |
| 1725.8119       | 863.4096  | 575.9421  | 16 | N 17        | 1726.9522       | <b>863.9797</b>  | 576.3223        |
| 1822.8646       | 911.9360  | 608.2931  | 17 | P 16        | 1612.9093       | <b>806.9583</b>  | 538.3079        |
| 1978.9910       | 989.9991  | 660.3352  | 18 | <b>K</b> 15 | 1515.8565       | 758.4319         | 505.9570        |
| 2036.0125       | 1018.5099 | 679.3423  | 19 | G 14        | 1359.7302       | 680.3687         | 453.9149        |
| 2165.0551       | 1083.0312 | 722.3565  | 20 | E 13        | 1302.7087       | 651.8580         | 434.9078        |
| 2296.0955       | 1148.5514 | 766.0367  | 21 | M 12        | 1173.6661       | <b>587.3367</b>  | 391.8936        |
| 2452.2219       | 1226.6146 | 818.0788  | 22 | <b>K</b> 11 | 1042.6256       | 521.8164         | 348.2134        |
| 2509.2434       | 1255.1253 | 837.0860  | 23 | G 10        | 886.4993        | 443.7533         | 296.1713        |
| 2596.2754       | 1298.6413 | 866.0967  | 24 | S 9         | 829.4778        | 415.2425         | 277.1641        |
| 2667.3125       | 1334.1599 | 889.7757  | 25 | A 8         | 742.4458        | 371.7265         | 248.1534        |
| 2780.3966       | 1390.7019 | 927.4704  | 26 | I 7         | 671.4087        | 336.2080         | 224.4744        |
| 2881.4443       | 1441.2258 | 961.1529  | 27 | T 6         | <b>558.3246</b> | 279.6659         | 186.7797        |
| 2938.4657       | 1469.7365 | 980.1601  | 28 | G 5         | <b>457.2769</b> | 229.1421         | 153.0972        |
| 3035.5185       | 1518.2629 | 1012.5110 | 29 | P 4         | <b>400.2554</b> | 200.6314         | 134.0900        |
| 3134.5869       | 1567.7971 | 1045.5338 | 30 | V 3         | 303.2027        | 152.1050         | 101.7391        |
| 3191.6084       | 1596.3078 | 1064.5410 | 31 | G 2         | <b>204.1343</b> | 102.5708         | 68.7163         |
|                 |           |           | 32 | <b>K</b> 1  | <b>147.1128</b> | 74.0600          | 49.7091         |

[\[Click\]](#) to move table  
Static Modifications:  
C: 57.02146  
Variable Modifications:  
K: 28.0314

# RPL23B

R.DGVFLYFEDNAGVIANPdi**K**GEMdi**K**GSAITGPVGK.E [88, 119]

(missed 2)

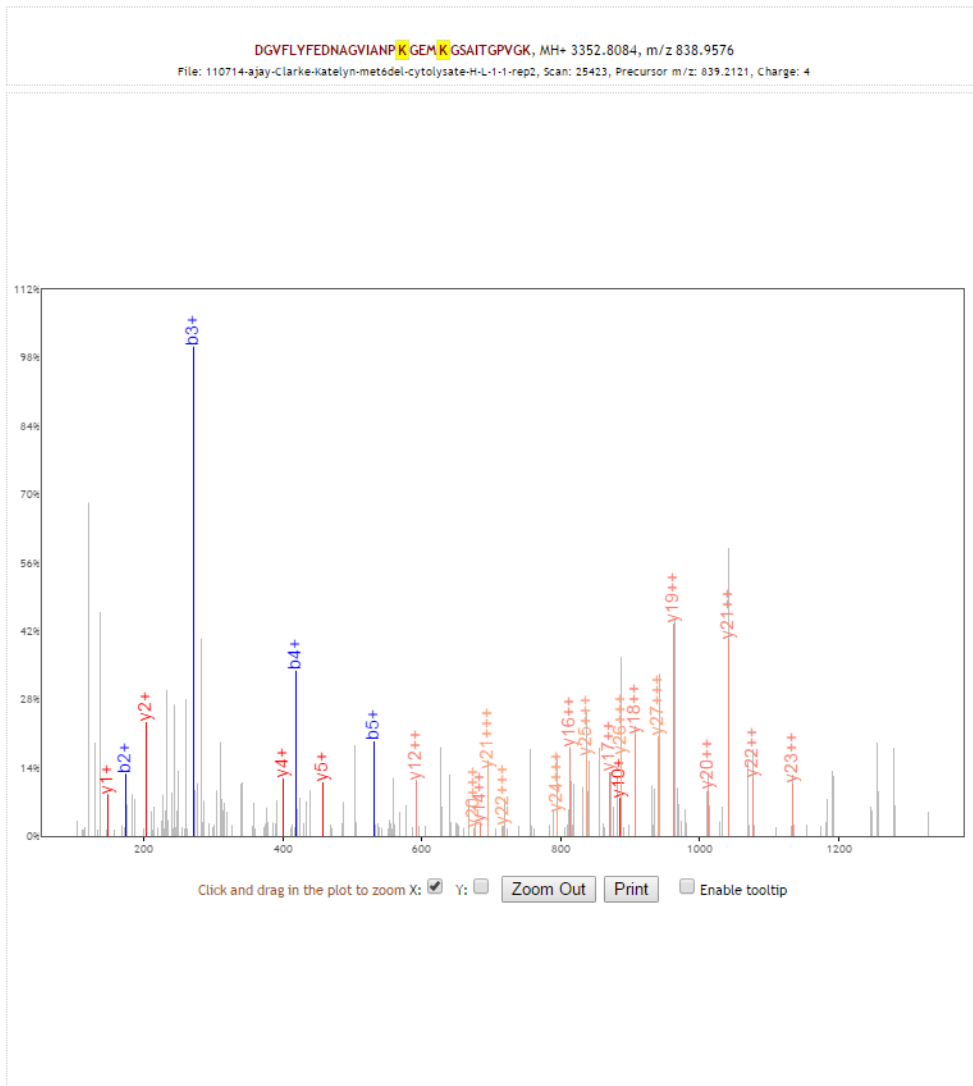

| b+        | b2+       | b3+       | #  | Seq # | y+        | y2+       | y3+       |
|-----------|-----------|-----------|----|-------|-----------|-----------|-----------|
| 116.0342  | 58.5207   | 39.3496   | 1  | D 32  |           |           |           |
| 173.0557  | 87.0315   | 58.3567   | 2  | G 31  | 3237.7814 | 1619.3944 | 1079.9320 |
| 272.1241  | 136.5657  | 91.3795   | 3  | V 30  | 3180.7600 | 1590.8836 | 1060.9248 |
| 419.1925  | 210.0999  | 140.4024  | 4  | F 29  | 3081.6916 | 1541.3494 | 1027.9020 |
| 532.2766  | 266.6419  | 178.0970  | 5  | L 28  | 2934.6232 | 1467.8152 | 978.8792  |
| 695.3399  | 348.1736  | 232.4515  | 6  | Y 27  | 2821.5391 | 1411.2732 | 941.1845  |
| 842.4083  | 421.7078  | 281.4743  | 7  | F 26  | 2658.4758 | 1329.7415 | 886.8301  |
| 971.4509  | 486.2291  | 324.4885  | 8  | E 25  | 2511.4073 | 1256.2073 | 837.8073  |
| 1086.4779 | 543.7426  | 362.8308  | 9  | D 24  | 2382.3648 | 1191.6860 | 794.7931  |
| 1200.5208 | 600.7640  | 400.8451  | 10 | N 23  | 2267.3378 | 1134.1725 | 756.4508  |
| 1271.5579 | 636.2826  | 424.5241  | 11 | A 22  | 2153.2949 | 1077.1511 | 718.4365  |
| 1328.5794 | 664.7933  | 443.5313  | 12 | G 21  | 2082.2578 | 1041.6325 | 694.7574  |
| 1427.6478 | 714.3275  | 476.5541  | 13 | V 20  | 2025.2363 | 1013.1218 | 675.7503  |
| 1540.7318 | 770.8696  | 514.2488  | 14 | I 19  | 1926.1679 | 963.5876  | 642.7275  |
| 1611.7690 | 806.3881  | 537.9278  | 15 | A 18  | 1813.0838 | 907.0456  | 605.0328  |
| 1725.8119 | 863.4096  | 575.9421  | 16 | N 17  | 1742.0467 | 871.5270  | 581.3538  |
| 1822.8646 | 911.9360  | 608.2931  | 17 | P 16  | 1628.0038 | 814.5055  | 543.3394  |
| 1985.0288 | 993.0180  | 662.3478  | 18 | K 15  | 1530.9510 | 765.9792  | 510.9885  |
| 2042.0503 | 1021.5288 | 681.3549  | 19 | G 14  | 1368.7869 | 684.8971  | 456.9338  |
| 2171.0929 | 1086.0501 | 724.3691  | 20 | E 13  | 1311.7654 | 656.3863  | 437.9267  |
| 2305.1522 | 1153.0798 | 769.0556  | 21 | M 12  | 1182.7228 | 591.8650  | 394.9125  |
| 2467.3164 | 1234.1618 | 823.1103  | 22 | K 11  | 1048.6634 | 524.8353  | 350.2260  |
| 2524.3379 | 1262.6726 | 842.1175  | 23 | G 10  | 886.4993  | 443.7533  | 296.1713  |
| 2611.3699 | 1306.1886 | 871.1282  | 24 | S 9   | 829.4778  | 415.2425  | 277.1641  |
| 2682.4070 | 1341.7071 | 894.8072  | 25 | A 8   | 742.4458  | 371.7265  | 248.1534  |
| 2795.4911 | 1398.2492 | 932.5019  | 26 | I 7   | 671.4087  | 336.2080  | 224.4744  |
| 2896.5388 | 1448.7730 | 966.1844  | 27 | T 6   | 558.3246  | 279.6659  | 186.7797  |
| 2953.5602 | 1477.2837 | 985.1916  | 28 | G 5   | 457.2769  | 229.1421  | 153.0972  |
| 3050.6130 | 1525.8101 | 1017.5425 | 29 | P 4   | 400.2554  | 200.6314  | 134.0900  |
| 3149.6814 | 1575.3443 | 1050.5653 | 30 | V 3   | 303.2027  | 152.1050  | 101.7391  |
| 3206.7029 | 1603.8551 | 1069.5725 | 31 | G 2   | 204.1343  | 102.5708  | 68.7163   |
|           |           |           | 32 | K 1   | 147.1128  | 74.0600   | 49.7091   |

[\[Click\]](#) to move table  
 Static Modifications:  
 C: 57.02146  
 M: 3.0189  
 Variable Modifications:  
 K: 34.0692

Replicate 2

# RPL23B

R.DGVFLYFEDNAGVIANPdi**KGEM**di**KGSAITGPV**GK.E [88, 119]

(missed 2)

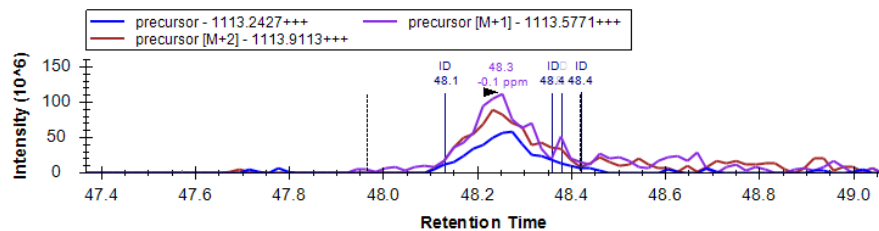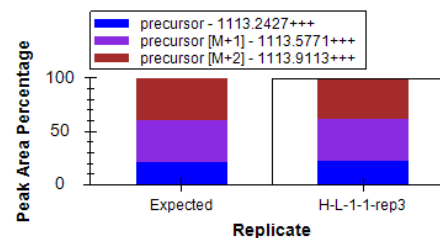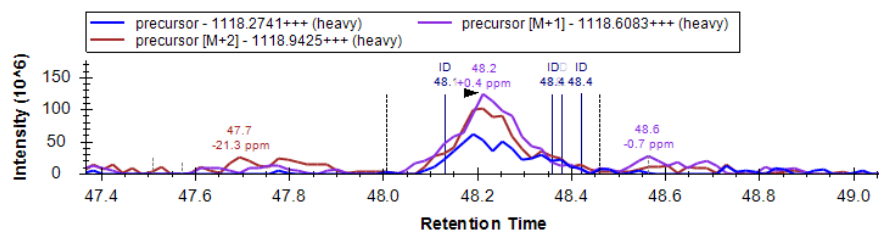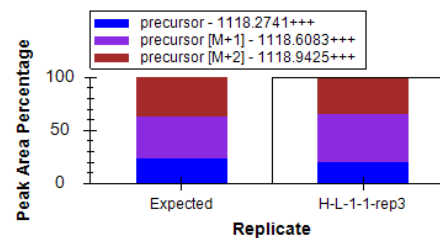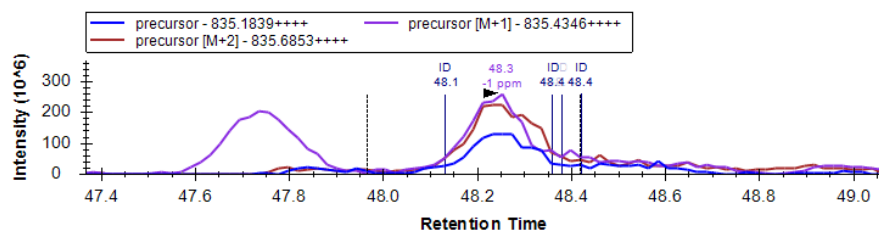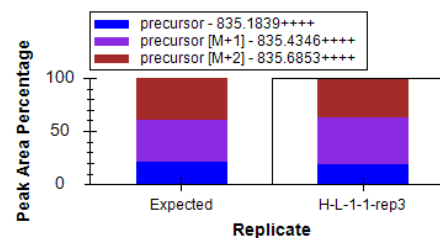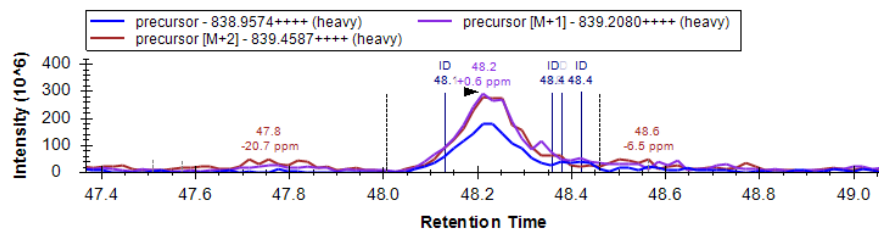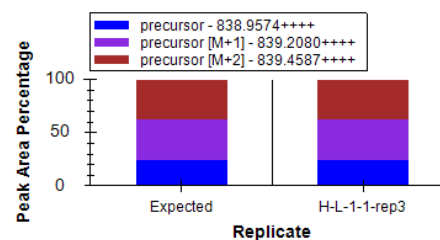

Replicate 3



# RPL23B

R.DGVFLYFEDNAGVIANPdi**K**GEMdi**K**GSAITGPVGK.E [88, 119]  
(missed 2)

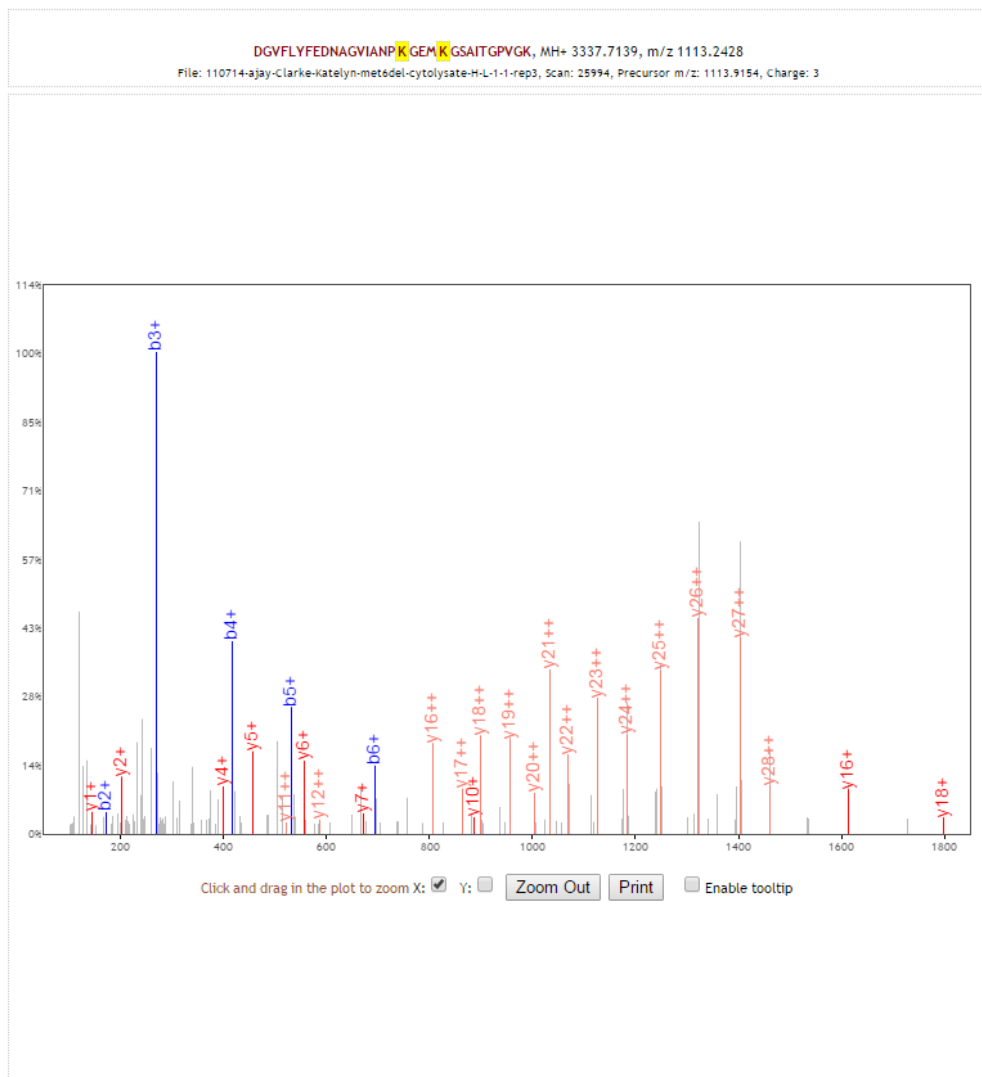

| b+        | b2+       | #  | Seq # | y+        | y2+       |
|-----------|-----------|----|-------|-----------|-----------|
| 116.0342  | 58.5207   | 1  | D 32  |           |           |
| 173.0557  | 87.0315   | 2  | G 31  | 3222.6869 | 1611.8471 |
| 272.1241  | 136.5657  | 3  | V 30  | 3165.6655 | 1583.3364 |
| 419.1925  | 210.0999  | 4  | F 29  | 3066.5971 | 1533.8022 |
| 532.2766  | 266.6419  | 5  | L 28  | 2919.5287 | 1460.2680 |
| 695.3399  | 348.1736  | 6  | Y 27  | 2806.4446 | 1403.7259 |
| 842.4083  | 421.7078  | 7  | F 26  | 2643.3813 | 1322.1943 |
| 971.4509  | 486.2291  | 8  | E 25  | 2496.3128 | 1248.6601 |
| 1086.4779 | 543.7426  | 9  | D 24  | 2367.2703 | 1184.1388 |
| 1200.5208 | 600.7640  | 10 | N 23  | 2252.2433 | 1126.6253 |
| 1271.5579 | 636.2826  | 11 | A 22  | 2138.2004 | 1069.6038 |
| 1328.5794 | 664.7933  | 12 | G 21  | 2067.1633 | 1034.0853 |
| 1427.6478 | 714.3275  | 13 | V 20  | 2010.1418 | 1005.5745 |
| 1540.7318 | 770.8696  | 14 | I 19  | 1911.0734 | 956.0403  |
| 1611.7690 | 806.3881  | 15 | A 18  | 1797.9893 | 899.4983  |
| 1725.8119 | 863.4096  | 16 | N 17  | 1726.9522 | 863.9797  |
| 1822.8646 | 911.9360  | 17 | P 16  | 1612.9093 | 806.9583  |
| 1978.9910 | 989.9991  | 18 | K 15  | 1515.8565 | 758.4319  |
| 2036.0125 | 1018.5099 | 19 | G 14  | 1359.7302 | 680.3687  |
| 2165.0551 | 1083.0312 | 20 | E 13  | 1302.7087 | 651.8580  |
| 2296.0955 | 1148.5514 | 21 | M 12  | 1173.6661 | 587.3367  |
| 2452.2219 | 1226.6146 | 22 | K 11  | 1042.6256 | 521.8164  |
| 2509.2434 | 1255.1253 | 23 | G 10  | 886.4993  | 443.7533  |
| 2596.2754 | 1298.6413 | 24 | S 9   | 829.4778  | 415.2425  |
| 2667.3125 | 1334.1599 | 25 | A 8   | 742.4458  | 371.7265  |
| 2780.3966 | 1390.7019 | 26 | I 7   | 671.4087  | 336.2080  |
| 2881.4443 | 1441.2258 | 27 | T 6   | 558.3246  | 279.6659  |
| 2938.4657 | 1469.7365 | 28 | G 5   | 457.2769  | 229.1421  |
| 3035.5185 | 1518.2629 | 29 | P 4   | 400.2554  | 200.6314  |
| 3134.5869 | 1567.7971 | 30 | V 3   | 303.2027  | 152.1050  |
| 3191.6084 | 1596.3078 | 31 | G 2   | 204.1343  | 102.5708  |
|           |           | 32 | K 1   | 147.1128  | 74.0600   |

[\[Click\]](#) to move table  
Static Modifications:  
C: 57.02146  
Variable Modifications:  
K: 28.0314

# RPL23B

R.DGVFLYFEDNAGVIANPdi**K**GEMdi**K**GSAITGPVGK.E [88, 119]  
(missed 2)

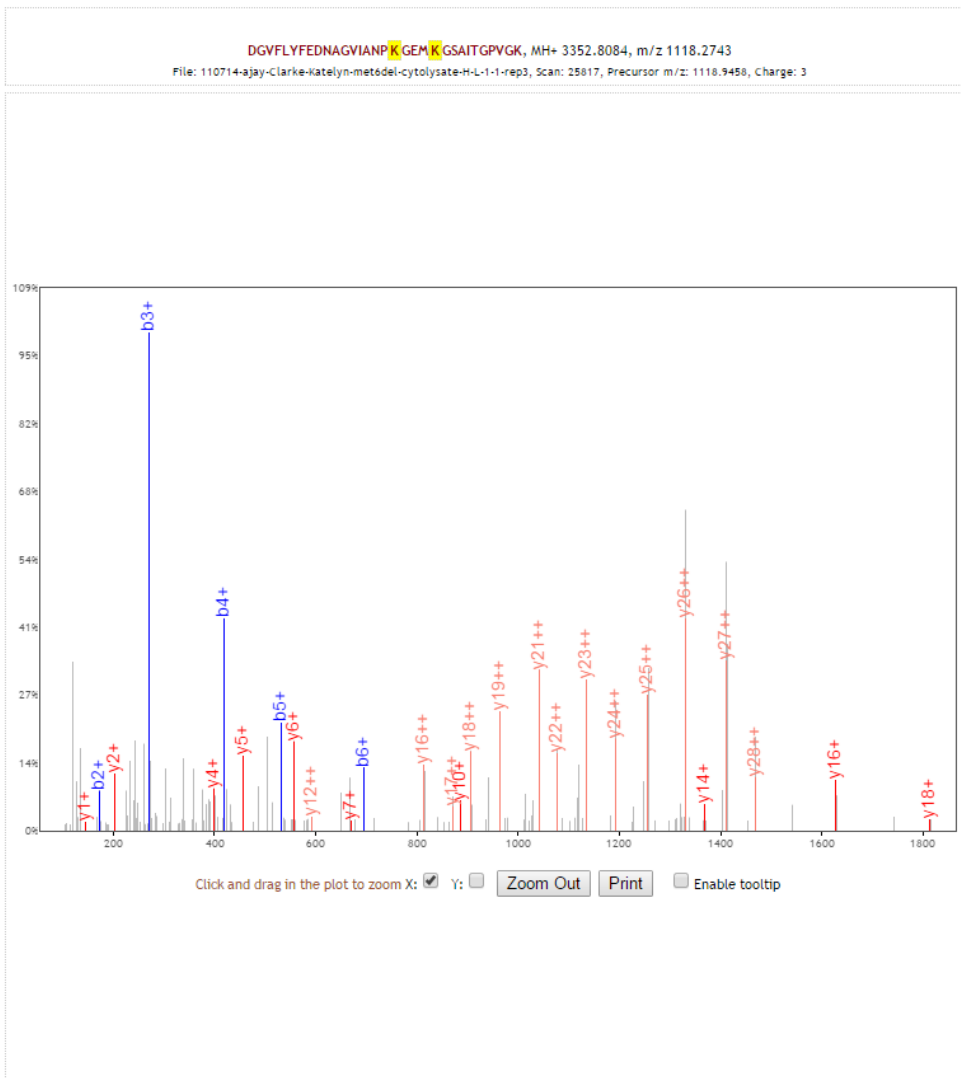

| b+        | b2+       | #  | Seq | #  | y+        | y2+       |
|-----------|-----------|----|-----|----|-----------|-----------|
| 116.0342  | 58.5207   | 1  | D   | 32 |           |           |
| 173.0557  | 87.0315   | 2  | G   | 31 | 3237.7814 | 1619.3944 |
| 272.1241  | 136.5657  | 3  | V   | 30 | 3180.7600 | 1590.8836 |
| 419.1925  | 210.0999  | 4  | F   | 29 | 3081.6916 | 1541.3494 |
| 532.2766  | 266.6419  | 5  | L   | 28 | 2934.6232 | 1467.8152 |
| 695.3399  | 348.1736  | 6  | Y   | 27 | 2821.5391 | 1411.2732 |
| 842.4083  | 421.7078  | 7  | F   | 26 | 2658.4758 | 1329.7415 |
| 971.4509  | 486.2291  | 8  | E   | 25 | 2511.4073 | 1256.2073 |
| 1086.4779 | 543.7426  | 9  | D   | 24 | 2382.3648 | 1191.6860 |
| 1200.5208 | 600.7640  | 10 | N   | 23 | 2267.3378 | 1134.1725 |
| 1271.5579 | 636.2826  | 11 | A   | 22 | 2153.2949 | 1077.1511 |
| 1328.5794 | 664.7933  | 12 | G   | 21 | 2082.2578 | 1041.6325 |
| 1427.6478 | 714.3275  | 13 | V   | 20 | 2025.2363 | 1013.1218 |
| 1540.7318 | 770.8696  | 14 | I   | 19 | 1926.1679 | 963.5876  |
| 1611.7690 | 806.3881  | 15 | A   | 18 | 1813.0838 | 907.0456  |
| 1725.8119 | 863.4096  | 16 | N   | 17 | 1742.0467 | 871.5270  |
| 1822.8646 | 911.9360  | 17 | P   | 16 | 1628.0038 | 814.5055  |
| 1985.0288 | 993.0180  | 18 | K   | 15 | 1530.9510 | 765.9792  |
| 2042.0503 | 1021.5288 | 19 | G   | 14 | 1368.7869 | 684.8971  |
| 2171.0929 | 1086.0501 | 20 | E   | 13 | 1311.7654 | 656.3863  |
| 2305.1522 | 1153.0798 | 21 | M   | 12 | 1182.7228 | 591.8650  |
| 2467.3164 | 1234.1618 | 22 | K   | 11 | 1048.6634 | 524.8353  |
| 2524.3379 | 1262.6726 | 23 | G   | 10 | 886.4993  | 443.7533  |
| 2611.3699 | 1306.1886 | 24 | S   | 9  | 829.4778  | 415.2425  |
| 2682.4070 | 1341.7071 | 25 | A   | 8  | 742.4458  | 371.7265  |
| 2795.4911 | 1398.2492 | 26 | I   | 7  | 671.4087  | 336.2080  |
| 2896.5388 | 1448.7730 | 27 | T   | 6  | 558.3246  | 279.6659  |
| 2953.5602 | 1477.2837 | 28 | G   | 5  | 457.2769  | 229.1421  |
| 3050.6130 | 1525.8101 | 29 | P   | 4  | 400.2554  | 200.6314  |
| 3149.6814 | 1575.3443 | 30 | V   | 3  | 303.2027  | 152.1050  |
| 3206.7029 | 1603.8551 | 31 | G   | 2  | 204.1343  | 102.5708  |
|           |           | 32 | K   | 1  | 147.1128  | 74.0600   |

[\[Click\]](#) to move table  
Static Modifications:  
C: 57.02146  
M: 3.0189  
Variable Modifications:  
K: 34.0692

# RPL23B

R.DGVFLYFEDNAGVIANPdi**K**GEMdi**K**GSAITGPVGK.E [88, 119]  
(missed 2)

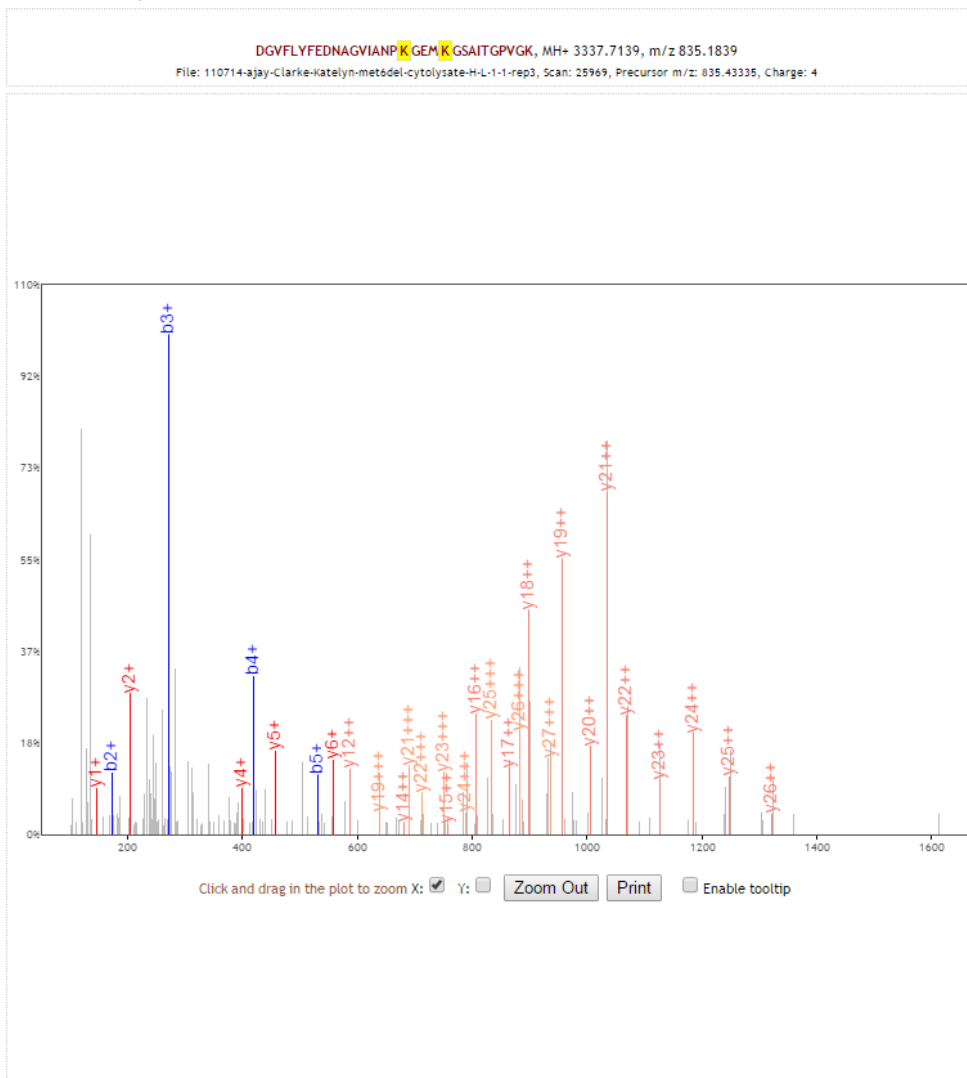

| b+              | b2+       | b3+       | #  | Seq #       | y+              | y2+       | y3+       |
|-----------------|-----------|-----------|----|-------------|-----------------|-----------|-----------|
| 116.0342        | 58.5207   | 39.3496   | 1  | D 32        |                 |           |           |
| <b>173.0557</b> | 87.0315   | 58.3567   | 2  | G 31        | 3222.6869       | 1611.8471 | 1074.9005 |
| <b>272.1241</b> | 136.5657  | 91.3795   | 3  | V 30        | 3165.6655       | 1583.3364 | 1055.8933 |
| <b>419.1925</b> | 210.0999  | 140.4024  | 4  | F 29        | 3066.5971       | 1533.8022 | 1022.8705 |
| <b>532.2766</b> | 266.6419  | 178.0970  | 5  | L 28        | 2919.5287       | 1460.2680 | 973.8477  |
| 695.3399        | 348.1736  | 232.4515  | 6  | Y 27        | 2806.4446       | 1403.7259 | 936.1530  |
| 842.4083        | 421.7078  | 281.4743  | 7  | F 26        | 2643.3813       | 1322.1943 | 881.7986  |
| 971.4509        | 486.2291  | 324.4885  | 8  | E 25        | 2496.3128       | 1248.6601 | 832.7758  |
| 1086.4779       | 543.7426  | 362.8308  | 9  | D 24        | 2367.2703       | 1184.1388 | 789.7616  |
| 1200.5208       | 600.7640  | 400.8451  | 10 | N 23        | 2252.2433       | 1126.6253 | 751.4193  |
| 1271.5579       | 636.2826  | 424.5241  | 11 | A 22        | 2138.2004       | 1069.6038 | 713.4050  |
| 1328.5794       | 664.7933  | 443.5313  | 12 | G 21        | 2067.1633       | 1034.0853 | 689.7259  |
| 1427.6478       | 714.3275  | 476.5541  | 13 | V 20        | 2010.1418       | 1005.5745 | 670.7188  |
| 1540.7318       | 770.8696  | 514.2488  | 14 | I 19        | 1911.0734       | 956.0403  | 637.6960  |
| 1611.7690       | 806.3881  | 537.9278  | 15 | A 18        | 1797.9893       | 899.4983  | 600.0013  |
| 1725.8119       | 863.4096  | 575.9421  | 16 | N 17        | 1726.9522       | 863.9797  | 576.3223  |
| 1822.8646       | 911.9360  | 608.2931  | 17 | P 16        | 1612.9093       | 806.9583  | 538.3079  |
| 1978.9910       | 989.9991  | 660.3352  | 18 | <b>K</b> 15 | 1515.8565       | 758.4319  | 505.9570  |
| 2036.0125       | 1018.5099 | 679.3423  | 19 | G 14        | 1359.7302       | 680.3687  | 453.9149  |
| 2165.0551       | 1083.0312 | 722.3565  | 20 | E 13        | 1302.7087       | 651.8580  | 434.9078  |
| 2296.0955       | 1148.5514 | 766.0367  | 21 | M 12        | 1173.6661       | 587.3367  | 391.8936  |
| 2452.2219       | 1226.6146 | 818.0788  | 22 | <b>K</b> 11 | 1042.6256       | 521.8164  | 348.2134  |
| 2509.2434       | 1255.1253 | 837.0860  | 23 | G 10        | 886.4993        | 443.7533  | 296.1713  |
| 2596.2754       | 1298.6413 | 866.0967  | 24 | S 9         | 829.4778        | 415.2425  | 277.1641  |
| 2667.3125       | 1334.1599 | 889.7757  | 25 | A 8         | 742.4458        | 371.7265  | 248.1534  |
| 2780.3966       | 1390.7019 | 927.4704  | 26 | I 7         | 671.4087        | 336.2080  | 224.4744  |
| 2881.4443       | 1441.2258 | 961.1529  | 27 | T 6         | <b>558.3246</b> | 279.6659  | 186.7797  |
| 2938.4657       | 1469.7365 | 980.1601  | 28 | G 5         | <b>457.2769</b> | 229.1421  | 153.0972  |
| 3035.5185       | 1518.2629 | 1012.5110 | 29 | P 4         | <b>400.2554</b> | 200.6314  | 134.0900  |
| 3134.5869       | 1567.7971 | 1045.5338 | 30 | V 3         | 303.2027        | 152.1050  | 101.7391  |
| 3191.6084       | 1596.3078 | 1064.5410 | 31 | G 2         | <b>204.1343</b> | 102.5708  | 68.7163   |
|                 |           |           | 32 | <b>K</b> 1  | <b>147.1128</b> | 74.0600   | 49.7091   |

[\[click\]](#) to move table  
Static Modifications:  
C: 57.02146  
Variable Modifications:  
K: 28.0314

# RPL23B

R.DGVFLYFEDNAGVIANPdi**K**GEMdi**K**GSAITGPVGK.E [88, 119]  
(missed 2)

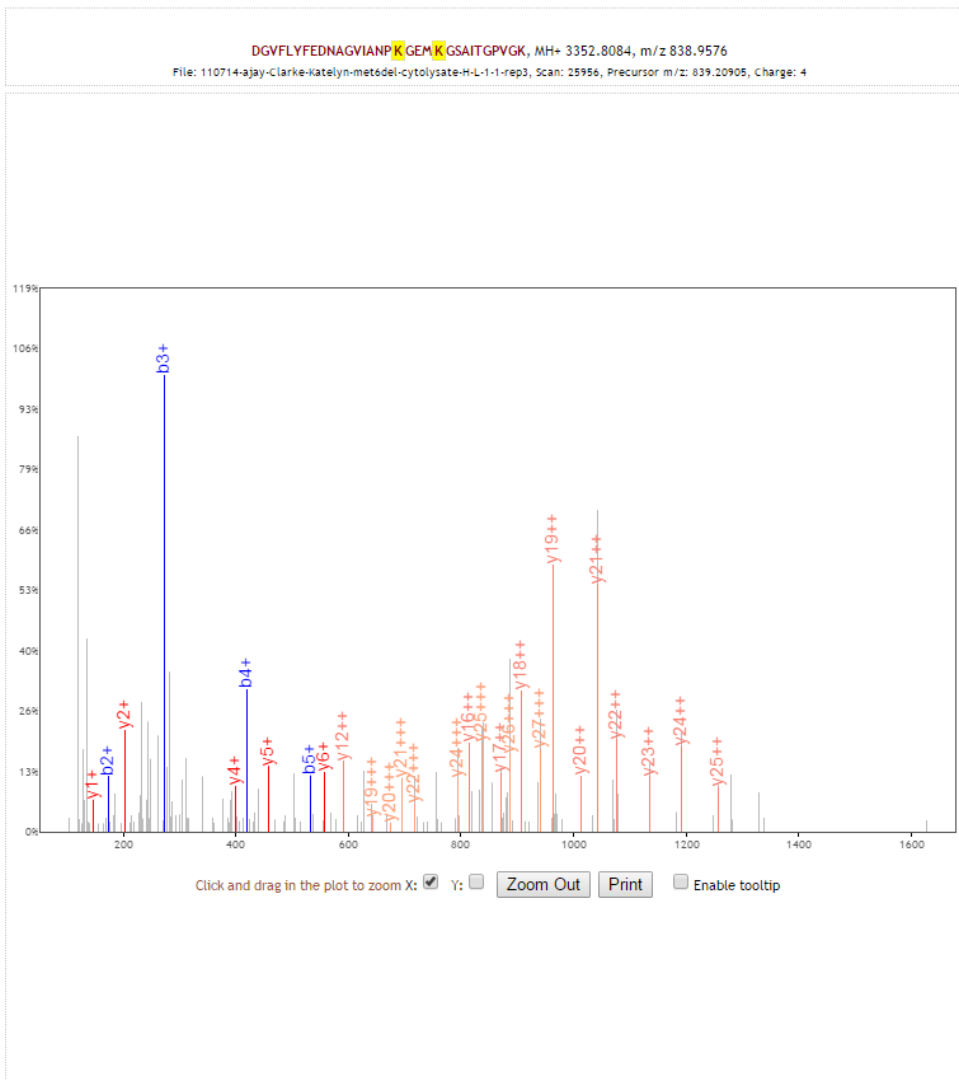

| b+        | b2+       | b3+       | #  | Seq # | y+        | y2+       | y3+       |
|-----------|-----------|-----------|----|-------|-----------|-----------|-----------|
| 116.0342  | 58.5207   | 39.3496   | 1  | D 32  |           |           |           |
| 173.0557  | 87.0315   | 58.3567   | 2  | G 31  | 3237.7814 | 1619.3944 | 1079.9320 |
| 272.1241  | 136.5657  | 91.3795   | 3  | V 30  | 3180.7600 | 1590.8836 | 1060.9248 |
| 419.1925  | 210.0999  | 140.4024  | 4  | F 29  | 3081.6916 | 1541.3494 | 1027.9020 |
| 532.2766  | 266.6419  | 178.0970  | 5  | L 28  | 2934.6232 | 1467.8152 | 978.8792  |
| 695.3399  | 348.1736  | 232.4515  | 6  | Y 27  | 2821.5391 | 1411.2732 | 941.1845  |
| 842.4083  | 421.7078  | 281.4743  | 7  | F 26  | 2658.4758 | 1329.7415 | 886.8301  |
| 971.4509  | 486.2291  | 324.4885  | 8  | E 25  | 2511.4073 | 1256.2073 | 837.8073  |
| 1086.4779 | 543.7426  | 362.8308  | 9  | D 24  | 2382.3648 | 1191.6860 | 794.7931  |
| 1200.5208 | 600.7640  | 400.8451  | 10 | N 23  | 2267.3378 | 1134.1725 | 756.4508  |
| 1271.5579 | 636.2826  | 424.5241  | 11 | A 22  | 2153.2949 | 1077.1511 | 718.4365  |
| 1328.5794 | 664.7933  | 443.5313  | 12 | G 21  | 2082.2578 | 1041.6325 | 694.7574  |
| 1427.6478 | 714.3275  | 476.5541  | 13 | V 20  | 2025.2363 | 1013.1218 | 675.7503  |
| 1540.7318 | 770.8696  | 514.2488  | 14 | I 19  | 1926.1679 | 963.5876  | 642.7275  |
| 1611.7690 | 806.3881  | 537.9278  | 15 | A 18  | 1813.0838 | 907.0456  | 605.0328  |
| 1725.8119 | 863.4096  | 575.9421  | 16 | N 17  | 1742.0467 | 871.5270  | 581.3538  |
| 1822.8646 | 911.9360  | 608.2931  | 17 | P 16  | 1628.0038 | 814.5055  | 543.3394  |
| 1985.0288 | 993.0180  | 662.3478  | 18 | K 15  | 1530.9510 | 765.9792  | 510.9885  |
| 2042.0503 | 1021.5288 | 681.3549  | 19 | G 14  | 1368.7869 | 684.8971  | 456.9338  |
| 2171.0929 | 1086.0501 | 724.3691  | 20 | E 13  | 1311.7654 | 656.3863  | 437.9267  |
| 2305.1522 | 1153.0798 | 769.0556  | 21 | M 12  | 1182.7228 | 591.8650  | 394.9125  |
| 2467.3164 | 1234.1618 | 823.1103  | 22 | K 11  | 1048.6634 | 524.8353  | 350.2260  |
| 2524.3379 | 1262.6726 | 842.1175  | 23 | G 10  | 886.4993  | 443.7533  | 296.1713  |
| 2611.3699 | 1306.1886 | 871.1282  | 24 | S 9   | 829.4778  | 415.2425  | 277.1641  |
| 2682.4070 | 1341.7071 | 894.8072  | 25 | A 8   | 742.4458  | 371.7265  | 248.1534  |
| 2795.4911 | 1398.2492 | 932.5019  | 26 | I 7   | 671.4087  | 336.2080  | 224.4744  |
| 2896.5388 | 1448.7730 | 966.1844  | 27 | T 6   | 558.3246  | 279.6659  | 186.7797  |
| 2953.5602 | 1477.2837 | 985.1916  | 28 | G 5   | 457.2769  | 229.1421  | 153.0972  |
| 3050.6130 | 1525.8101 | 1017.5425 | 29 | P 4   | 400.2554  | 200.6314  | 134.0900  |
| 3149.6814 | 1575.3443 | 1050.5653 | 30 | V 3   | 303.2027  | 152.1050  | 101.7391  |
| 3206.7029 | 1603.8551 | 1069.5725 | 31 | G 2   | 204.1343  | 102.5708  | 68.7163   |
|           |           |           | 32 | K 1   | 147.1128  | 74.0600   | 49.7091   |

[\[click\]](#) to move table  
Static Modifications:  
C: 57.02146  
M: 3.0189  
Variable Modifications:  
K: 34.0692

# RPL23B

## R.DGVFLYFEDNAGVIANPKGEMdiKGSAITGPVGdiK.E [88, 119] (missed 2)

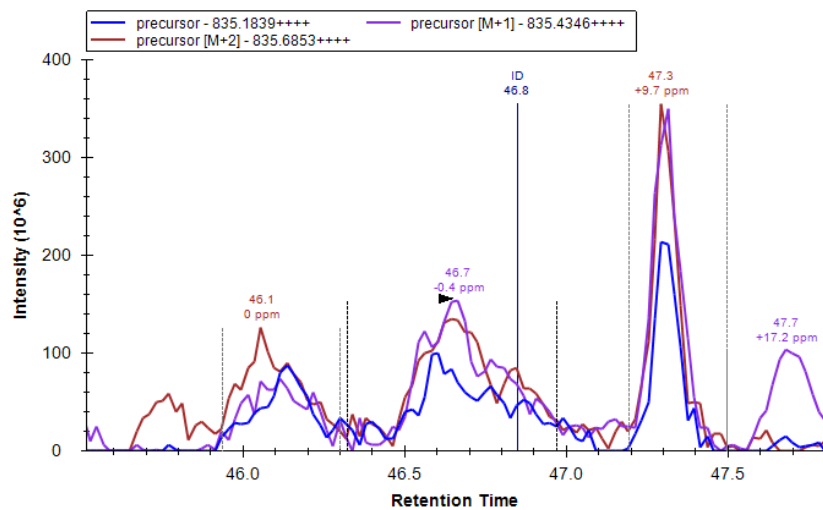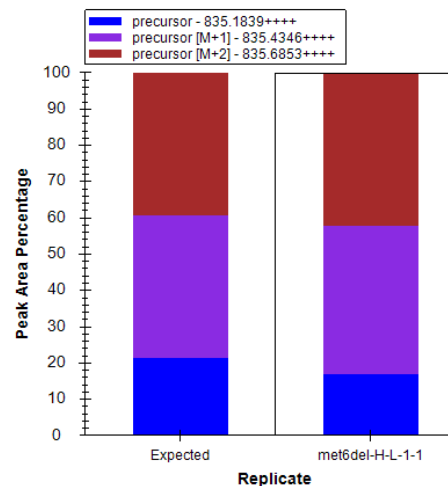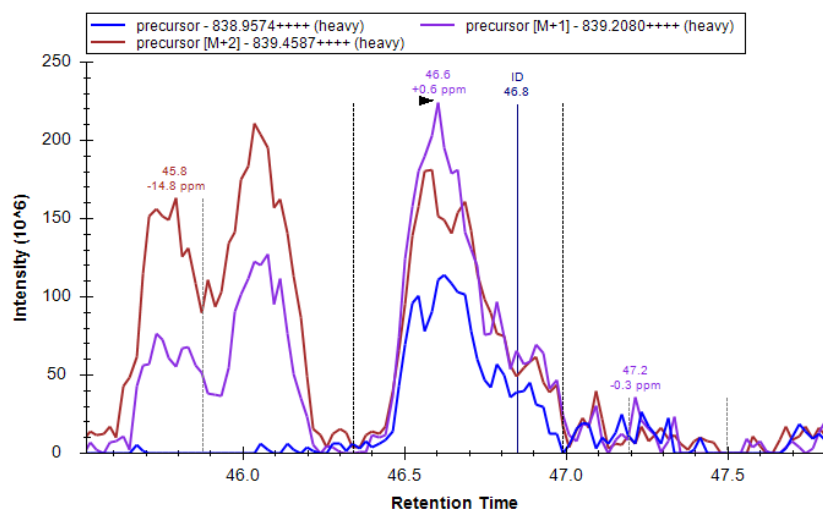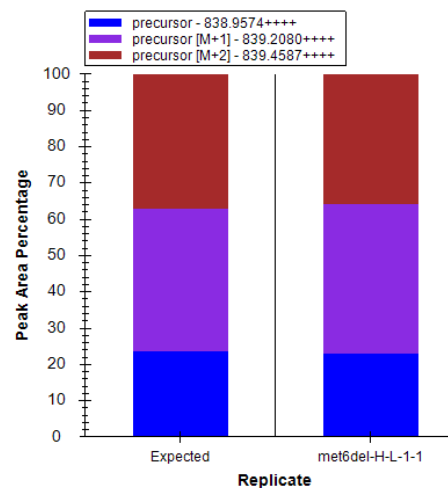

Replicate 1

# RPL23B

R.DGVFLYFEDNAGVIANPKGEMdiKGSAITGPVGdiK.E [88, 119]  
(missed 2)

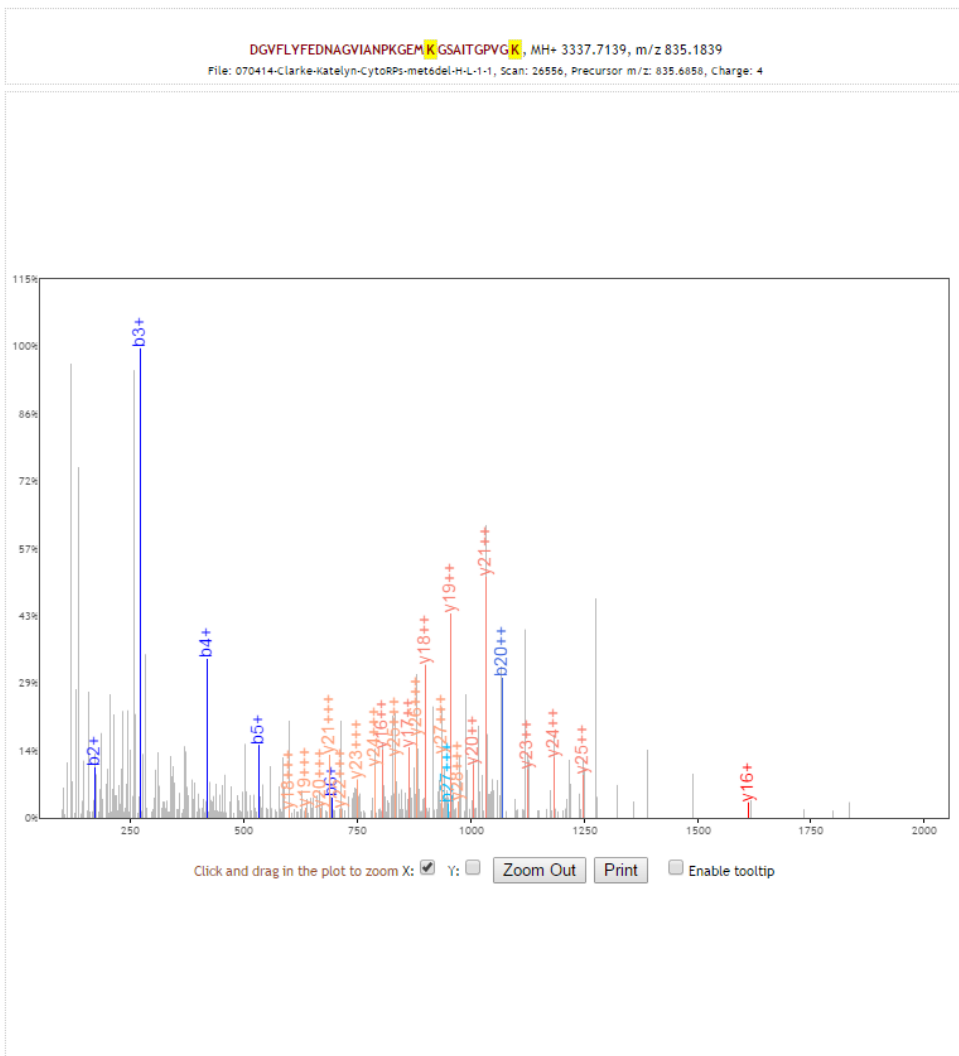

| b+        | b2+       | b3+       | #  | Seq # | y+        | y2+       | y3+       |
|-----------|-----------|-----------|----|-------|-----------|-----------|-----------|
| 116.0342  | 58.5207   | 39.3496   | 1  | D 32  |           |           |           |
| 173.0557  | 87.0315   | 58.3567   | 2  | G 31  | 3222.6869 | 1611.8471 | 1074.9005 |
| 272.1241  | 136.5657  | 91.3795   | 3  | V 30  | 3165.6655 | 1583.3364 | 1055.8933 |
| 419.1925  | 210.0999  | 140.4024  | 4  | F 29  | 3066.5971 | 1533.8022 | 1022.8705 |
| 532.2766  | 266.6419  | 178.0970  | 5  | L 28  | 2919.5287 | 1460.2680 | 973.8477  |
| 695.3399  | 348.1736  | 232.4515  | 6  | Y 27  | 2806.4446 | 1403.7259 | 936.1530  |
| 842.4083  | 421.7078  | 281.4743  | 7  | F 26  | 2643.3813 | 1322.1943 | 881.7986  |
| 971.4509  | 486.2291  | 324.4885  | 8  | E 25  | 2496.3128 | 1248.6601 | 832.7758  |
| 1086.4779 | 543.7426  | 362.8308  | 9  | D 24  | 2367.2703 | 1184.1388 | 789.7616  |
| 1200.5208 | 600.7640  | 400.8451  | 10 | N 23  | 2252.2433 | 1126.6253 | 751.4193  |
| 1271.5579 | 636.2826  | 424.5241  | 11 | A 22  | 2138.2004 | 1069.6038 | 713.4050  |
| 1328.5794 | 664.7933  | 443.5313  | 12 | G 21  | 2067.1633 | 1034.0853 | 689.7259  |
| 1427.6478 | 714.3275  | 476.5541  | 13 | V 20  | 2010.1418 | 1005.5745 | 670.7188  |
| 1540.7318 | 770.8696  | 514.2488  | 14 | I 19  | 1911.0734 | 956.0403  | 637.6960  |
| 1611.7690 | 806.3881  | 537.9278  | 15 | A 18  | 1797.9893 | 899.4983  | 600.0013  |
| 1725.8119 | 863.4096  | 575.9421  | 16 | N 17  | 1726.9522 | 863.9797  | 576.3223  |
| 1822.8646 | 911.9360  | 608.2931  | 17 | P 16  | 1612.9093 | 806.9583  | 538.3079  |
| 1950.9596 | 975.9834  | 650.9914  | 18 | K 15  | 1515.8565 | 758.4319  | 505.9570  |
| 2007.9811 | 1004.4942 | 669.9985  | 19 | G 14  | 1387.7616 | 694.3844  | 463.2587  |
| 2137.0237 | 1069.0155 | 713.0127  | 20 | E 13  | 1330.7401 | 665.8737  | 444.2516  |
| 2268.0641 | 1134.5357 | 756.6929  | 21 | M 12  | 1201.6975 | 601.3524  | 401.2374  |
| 2424.1905 | 1212.5989 | 808.7350  | 22 | K 11  | 1070.6570 | 535.8321  | 357.5572  |
| 2481.2120 | 1241.1096 | 827.7422  | 23 | G 10  | 914.5307  | 457.7690  | 305.5151  |
| 2568.2440 | 1284.6256 | 856.7529  | 24 | S 9   | 857.5092  | 429.2582  | 286.5079  |
| 2639.2811 | 1320.1442 | 880.4319  | 25 | A 8   | 770.4772  | 385.7422  | 257.4972  |
| 2752.3652 | 1376.6862 | 918.1266  | 26 | I 7   | 699.4401  | 350.2237  | 233.8182  |
| 2853.4129 | 1427.2101 | 951.8091  | 27 | T 6   | 586.3560  | 293.6816  | 196.1235  |
| 2910.4343 | 1455.7208 | 970.8163  | 28 | G 5   | 485.3083  | 243.1578  | 162.4410  |
| 3007.4871 | 1504.2472 | 1003.1672 | 29 | P 4   | 428.2868  | 214.6471  | 143.4338  |
| 3106.5555 | 1553.7814 | 1036.1900 | 30 | V 3   | 331.2341  | 166.1207  | 111.0829  |
| 3163.5770 | 1582.2921 | 1055.1972 | 31 | G 2   | 232.1657  | 116.5865  | 78.0601   |
|           |           |           | 32 | K 1   | 175.1442  | 88.0757   | 59.0529   |

[\[click\]](#) to move table  
Static Modifications:  
C: 57.02146  
Variable Modifications:  
K: 28.0314

# RPL23B

R.DGVFLYFEDNAGVIANPtri**K**GEMmono**K**GSAITGPVGK.E [88, 119] (missed 2)

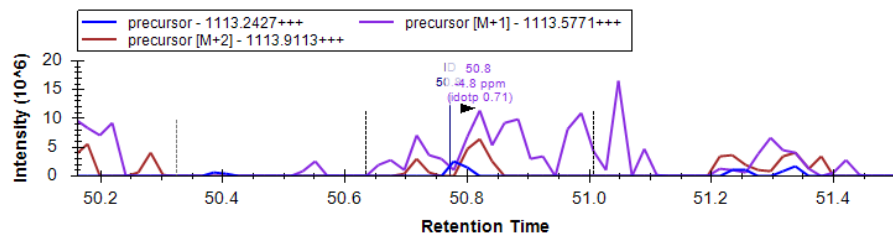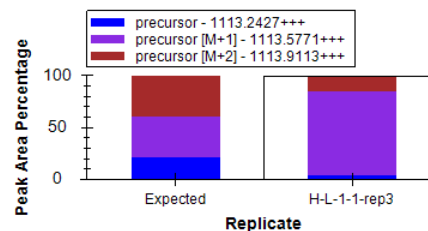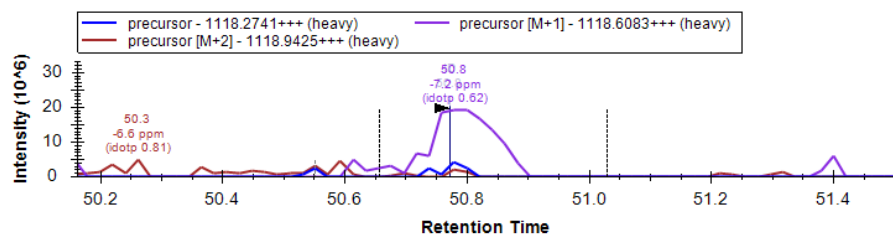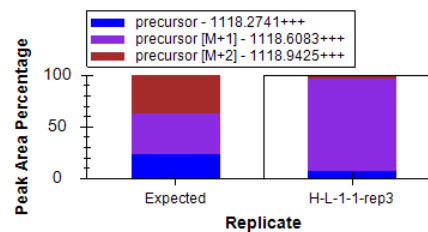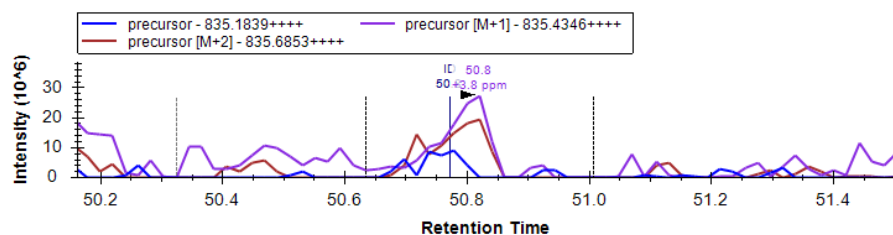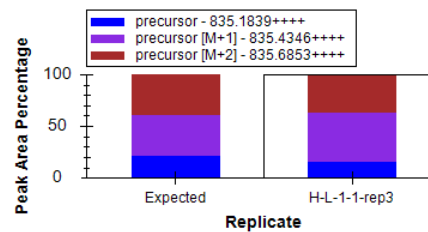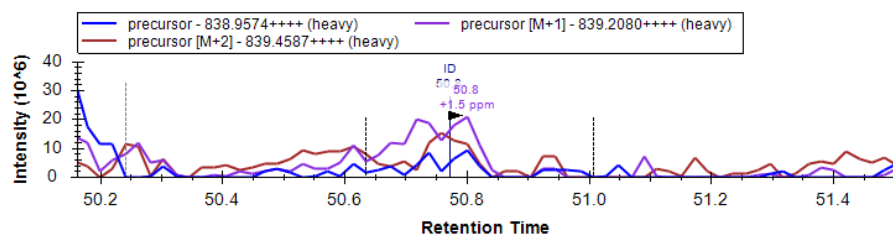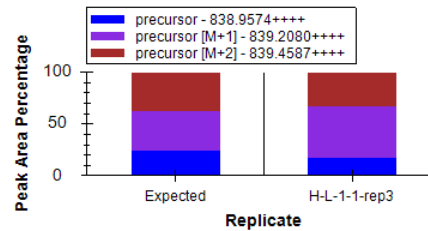

Replicate 3

# RPL23B

## R.DGVFLYFEDNAGVIANPtri**K**GEMmono**K**GSAITGPVGK.E [88, 119] (missed 2)

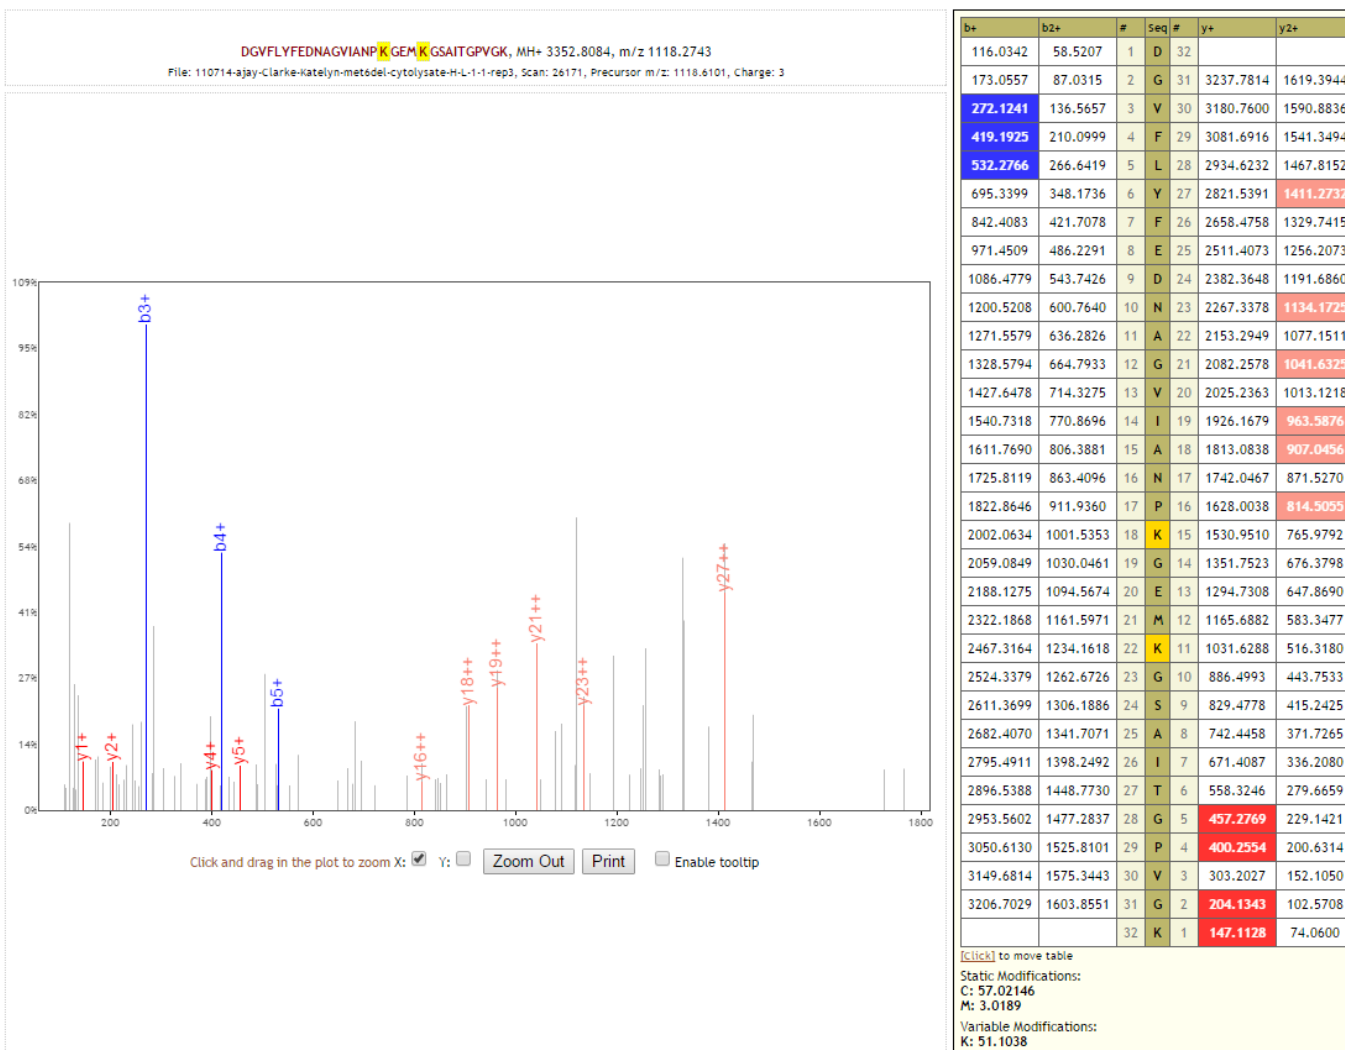

Replicate 3



# RPL23B

R.DGVFLYFEDNAGVIANPtri**K**GEMmono**K**GSAITGPVGK.E [88, 119] (missed 2)

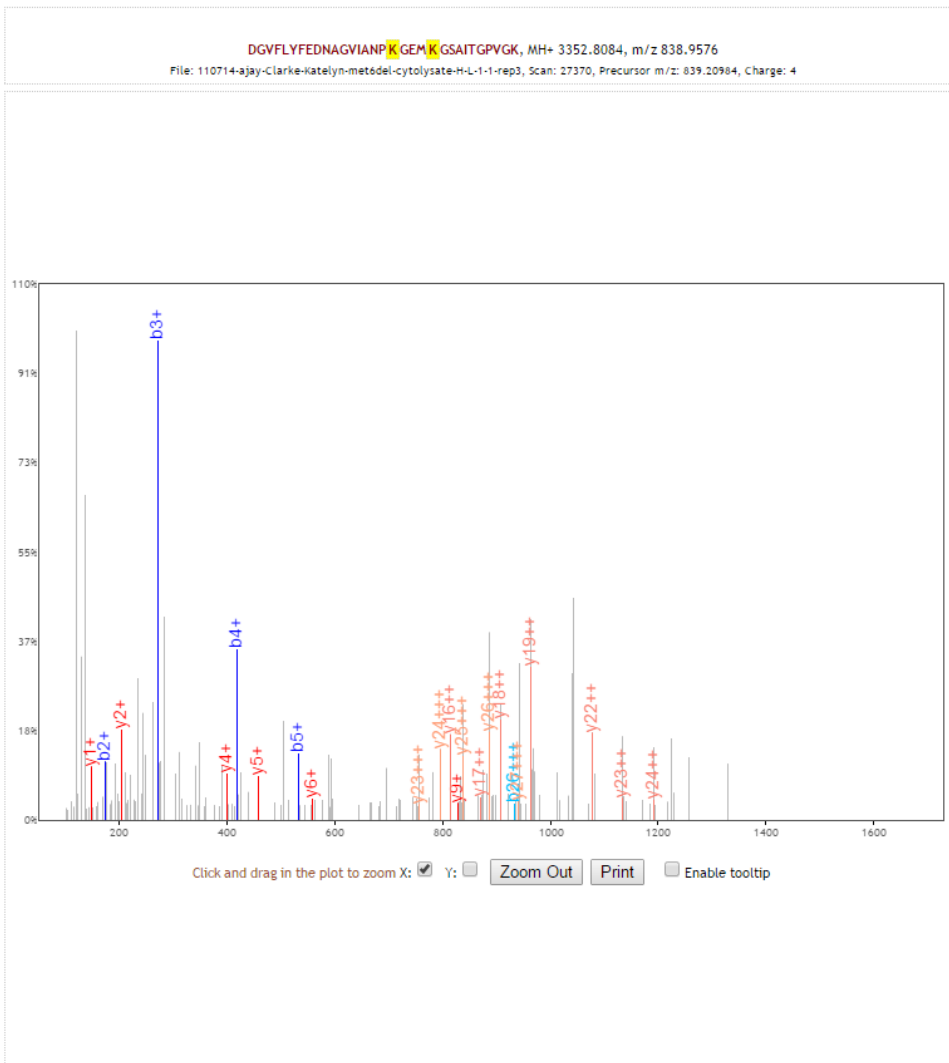

| b+              | b2+       | b3+             | #  | Seq      | #  | y+              | y2+              | y3+             |
|-----------------|-----------|-----------------|----|----------|----|-----------------|------------------|-----------------|
| 116.0342        | 58.5207   | 39.3496         | 1  | D        | 32 |                 |                  |                 |
| <b>173.0557</b> | 87.0315   | 58.3567         | 2  | G        | 31 | 3237.7814       | 1619.3944        | 1079.9320       |
| <b>272.1241</b> | 136.5657  | 91.3795         | 3  | V        | 30 | 3180.7600       | 1590.8836        | 1060.9248       |
| <b>419.1925</b> | 210.0999  | 140.4024        | 4  | F        | 29 | 3081.6916       | 1541.3494        | 1027.9020       |
| <b>532.2766</b> | 266.6419  | 178.0970        | 5  | L        | 28 | 2934.6232       | 1467.8152        | 978.8792        |
| 695.3399        | 348.1736  | 232.4515        | 6  | Y        | 27 | 2821.5391       | 1411.2732        | 941.1845        |
| 842.4083        | 421.7078  | 281.4743        | 7  | F        | 26 | 2658.4758       | 1329.7415        | 886.8301        |
| 971.4509        | 486.2291  | 324.4885        | 8  | E        | 25 | 2511.4073       | 1256.2073        | 837.8073        |
| 1086.4779       | 543.7426  | 362.8308        | 9  | D        | 24 | 2382.3648       | <b>1191.6860</b> | <b>794.7931</b> |
| 1200.5208       | 600.7640  | 400.8451        | 10 | N        | 23 | 2267.3378       | <b>1134.1725</b> | <b>756.4508</b> |
| 1271.5579       | 636.2826  | 424.5241        | 11 | A        | 22 | 2153.2949       | <b>1077.1511</b> | 718.4365        |
| 1328.5794       | 664.7933  | 443.5313        | 12 | G        | 21 | 2082.2578       | 1041.6325        | 694.7574        |
| 1427.6478       | 714.3275  | 476.5541        | 13 | V        | 20 | 2025.2363       | 1013.1218        | 675.7503        |
| 1540.7318       | 770.8696  | 514.2488        | 14 | I        | 19 | 1926.1679       | <b>963.5876</b>  | 642.7275        |
| 1611.7690       | 806.3881  | 537.9278        | 15 | A        | 18 | 1813.0838       | <b>907.0456</b>  | 605.0328        |
| 1725.8119       | 863.4096  | 575.9421        | 16 | N        | 17 | 1742.0467       | <b>871.5270</b>  | 581.3538        |
| 1822.8646       | 911.9360  | 608.2931        | 17 | P        | 16 | 1628.0038       | <b>814.5055</b>  | 543.3394        |
| 2002.0634       | 1001.5353 | 668.0260        | 18 | <b>K</b> | 15 | 1530.9510       | 765.9792         | 510.9885        |
| 2059.0849       | 1030.0461 | 687.0331        | 19 | G        | 14 | 1351.7523       | 676.3798         | 451.2556        |
| 2188.1275       | 1094.5674 | 730.0473        | 20 | E        | 13 | 1294.7308       | 647.8690         | 432.2485        |
| 2322.1868       | 1161.5971 | 774.7338        | 21 | M        | 12 | 1165.6882       | 583.3477         | 389.2343        |
| 2467.3164       | 1234.1618 | 823.1103        | 22 | <b>K</b> | 11 | 1031.6288       | 516.3180         | 344.5478        |
| 2524.3379       | 1262.6726 | 842.1175        | 23 | G        | 10 | 886.4993        | 443.7533         | 296.1713        |
| 2611.3699       | 1306.1886 | 871.1282        | 24 | S        | 9  | <b>829.4778</b> | 415.2425         | 277.1641        |
| 2682.4070       | 1341.7071 | 894.8072        | 25 | A        | 8  | 742.4458        | 371.7265         | 248.1534        |
| 2795.4911       | 1398.2492 | <b>932.5019</b> | 26 | I        | 7  | 671.4087        | 336.2080         | 224.4744        |
| 2896.5388       | 1448.7730 | 966.1844        | 27 | T        | 6  | <b>558.3246</b> | 279.6659         | 186.7797        |
| 2953.5602       | 1477.2837 | 985.1916        | 28 | G        | 5  | <b>457.2769</b> | 229.1421         | 153.0972        |
| 3050.6130       | 1525.8101 | 1017.5425       | 29 | P        | 4  | <b>400.2554</b> | 200.6314         | 134.0900        |
| 3149.6814       | 1575.3443 | 1050.5653       | 30 | V        | 3  | 303.2027        | 152.1050         | 101.7391        |
| 3206.7029       | 1603.8551 | 1069.5725       | 31 | G        | 2  | <b>204.1343</b> | 102.5708         | 68.7163         |
|                 |           |                 | 32 | <b>K</b> | 1  | <b>147.1128</b> | 74.0600          | 49.7091         |

[\[click\]](#) to move table

Static Modifications:  
 C: 57.02146  
 M: 3.0189

Variable Modifications:  
 K: 51.1038

# Histone H3

## K.SAPSTGGVKmono**K**PHR.Y [28, 40] (missed 1)

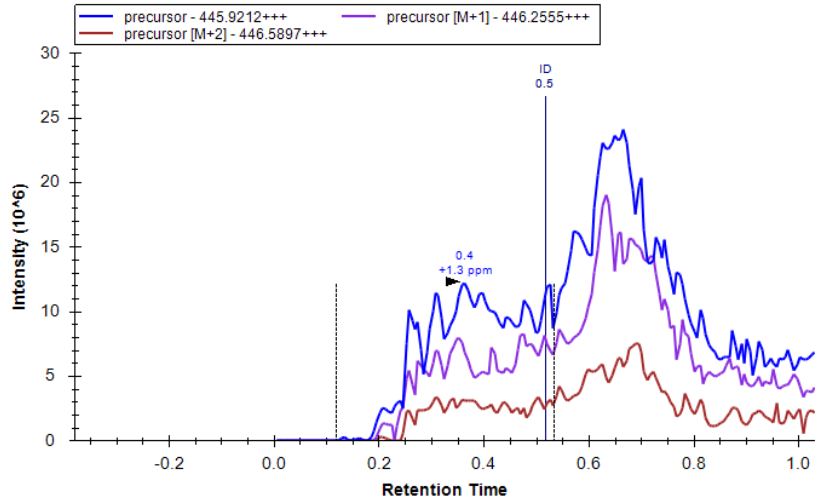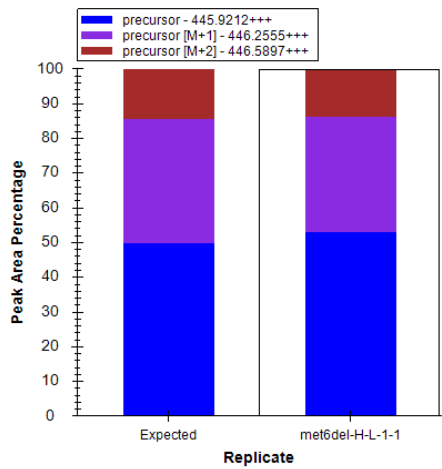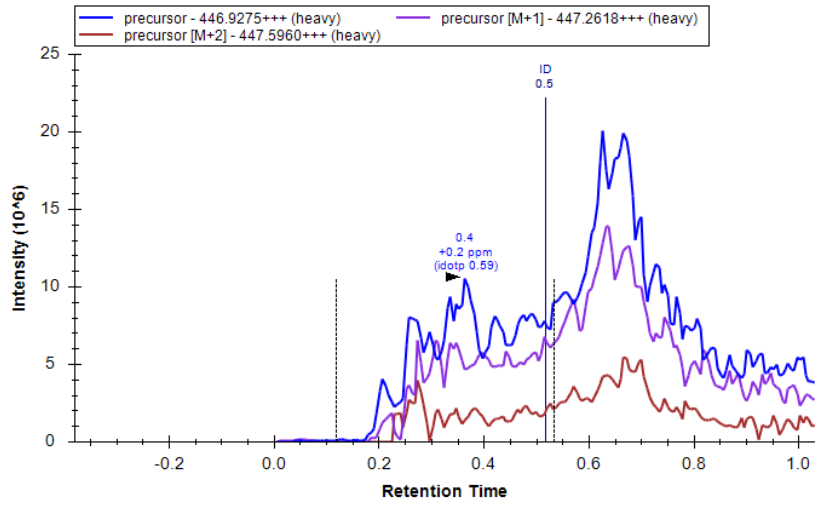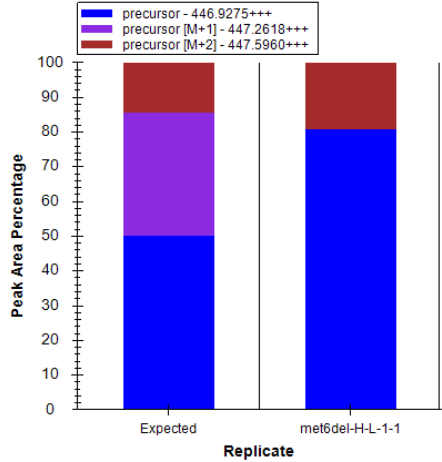

Replicate 1

# Histone H3

## K.SAPSTGGVKmono**K**PHR.Y [28, 40] (missed 1)

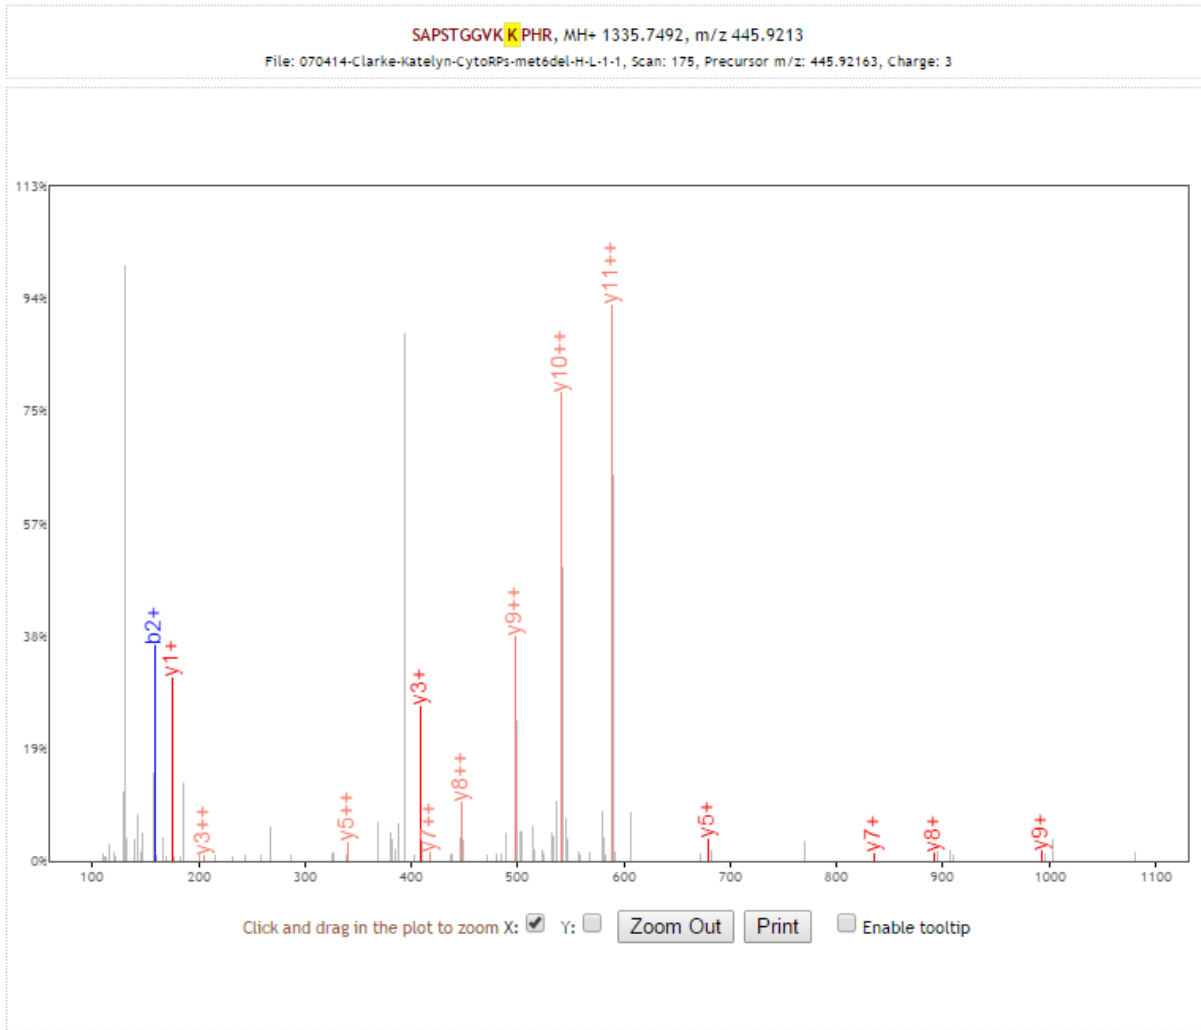

| b+              | b2+      | #  | Seq #      | y+              | y2+             |
|-----------------|----------|----|------------|-----------------|-----------------|
| 88.0393         | 44.5233  | 1  | S 13       |                 |                 |
| <b>159.0764</b> | 80.0418  | 2  | A 12       | 1248.7172       | 624.8622        |
| 256.1292        | 128.5682 | 3  | P 11       | 1177.6801       | <b>589.3437</b> |
| 343.1612        | 172.0842 | 4  | S 10       | 1080.6273       | <b>540.8173</b> |
| 444.2089        | 222.6081 | 5  | T 9        | <b>993.5953</b> | <b>497.3013</b> |
| 501.2304        | 251.1188 | 6  | G 8        | <b>892.5476</b> | <b>446.7774</b> |
| 558.2518        | 279.6295 | 7  | G 7        | <b>835.5261</b> | <b>418.2667</b> |
| 657.3202        | 329.1638 | 8  | V 6        | 778.5047        | 389.7560        |
| 785.4152        | 393.2112 | 9  | K 5        | <b>679.4363</b> | <b>340.2218</b> |
| 927.5259        | 464.2666 | 10 | <b>K</b> 4 | 551.3413        | 276.1743        |
| 1024.5786       | 512.7929 | 11 | P 3        | <b>409.2306</b> | <b>205.1190</b> |
| 1161.6375       | 581.3224 | 12 | H 2        | 312.1779        | 156.5926        |
|                 |          | 13 | R 1        | <b>175.1190</b> | 88.0631         |

[\[Click\]](#) to move table

Static Modifications:  
 C: 57.02146

Variable Modifications:  
 K: 14.0157

# Histone H3

## K.SAPSTGGVdi**K**KPHR.Y [28, 40] (missed 1)

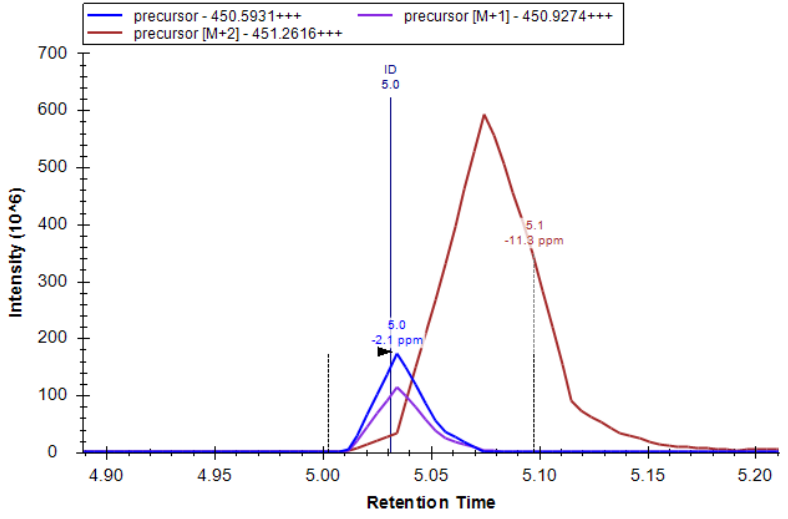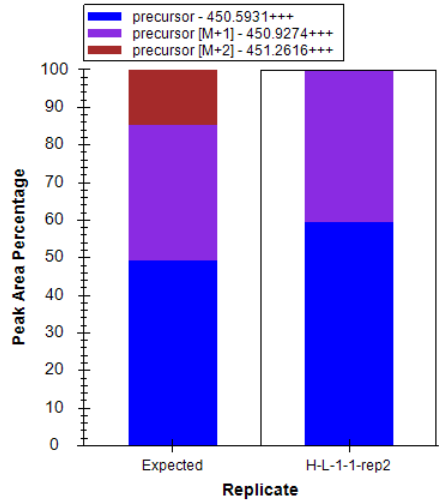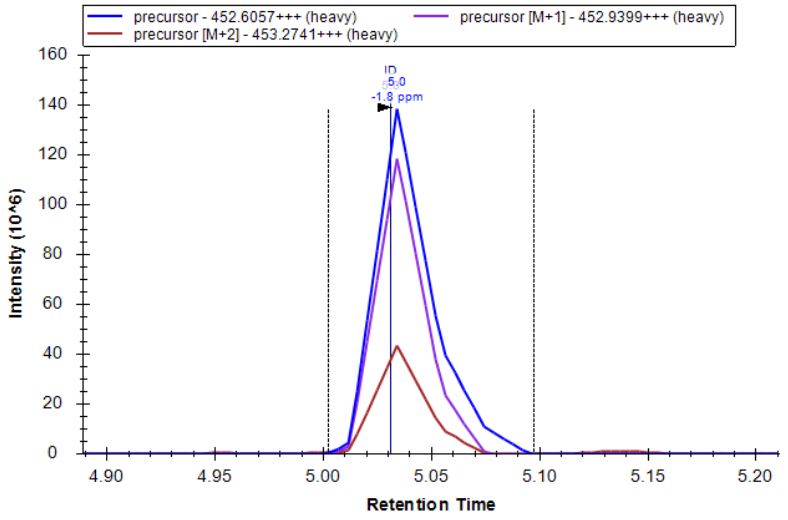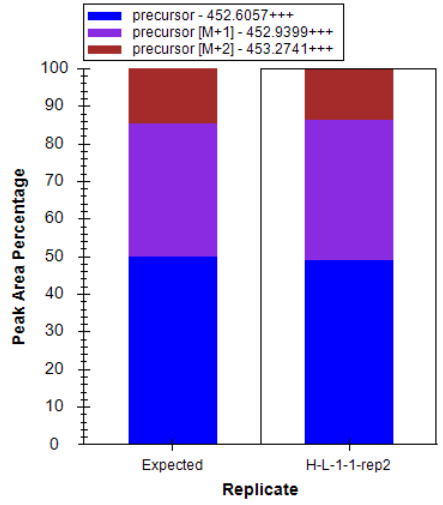

Replicate 2

# Histone H3

K.SAPSTGGVdi**K**KPHR.Y [28, 40] (missed 1)

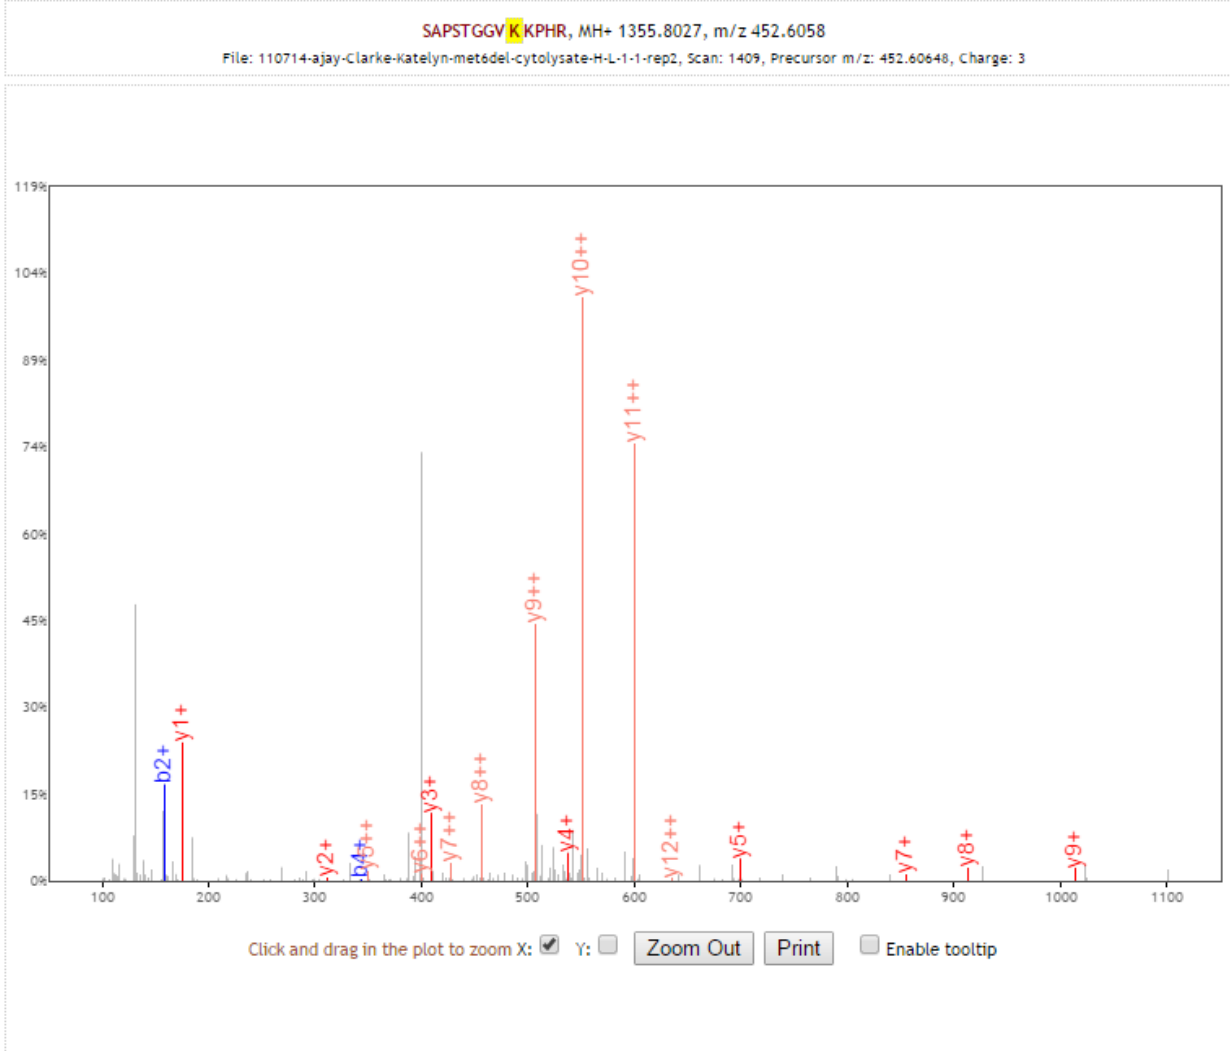

| b+        | b2+      | #  | Seq # | y+        | y2+      |
|-----------|----------|----|-------|-----------|----------|
| 88.0393   | 44.5233  | 1  | S 13  |           |          |
| 159.0764  | 80.0418  | 2  | A 12  | 1268.7707 | 634.8890 |
| 256.1292  | 128.5682 | 3  | P 11  | 1197.7336 | 599.3704 |
| 343.1612  | 172.0842 | 4  | S 10  | 1100.6808 | 550.8440 |
| 444.2089  | 222.6081 | 5  | T 9   | 1013.6488 | 507.3280 |
| 501.2304  | 251.1188 | 6  | G 8   | 912.6011  | 456.8042 |
| 558.2518  | 279.6295 | 7  | G 7   | 855.5796  | 428.2935 |
| 657.3202  | 329.1638 | 8  | V 6   | 798.5582  | 399.7827 |
| 819.4844  | 410.2458 | 9  | K 5   | 699.4898  | 350.2485 |
| 947.5794  | 474.2933 | 10 | K 4   | 537.3256  | 269.1664 |
| 1044.6321 | 522.8197 | 11 | P 3   | 409.2306  | 205.1190 |
| 1181.6910 | 591.3492 | 12 | H 2   | 312.1779  | 156.5926 |
|           |          | 13 | R 1   | 175.1190  | 88.0631  |

[\[Click\]](#) to move table

Static Modifications:  
 C: 57.02146  
 M: 3.0189

Variable Modifications:  
 K: 34.0692

# Histone H3

## K.SAPSTGGVdi**K**KPHR.Y [28, 40] (missed 1)

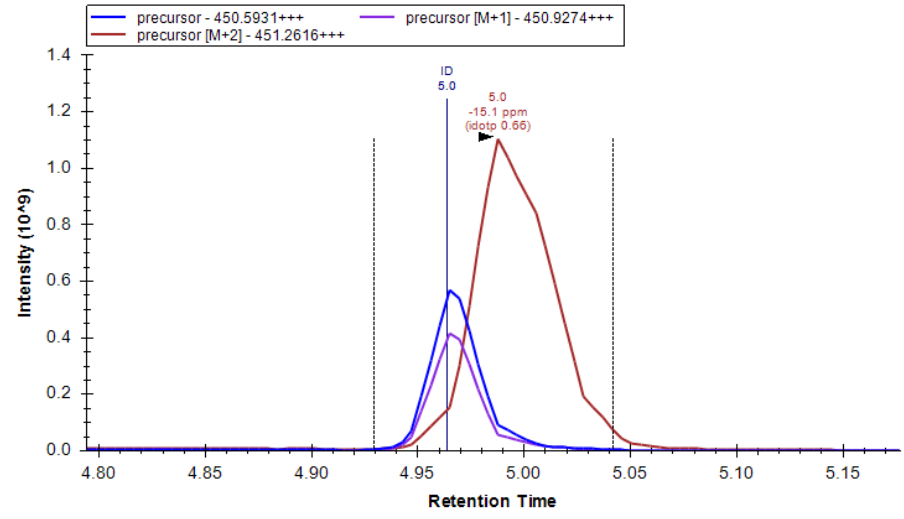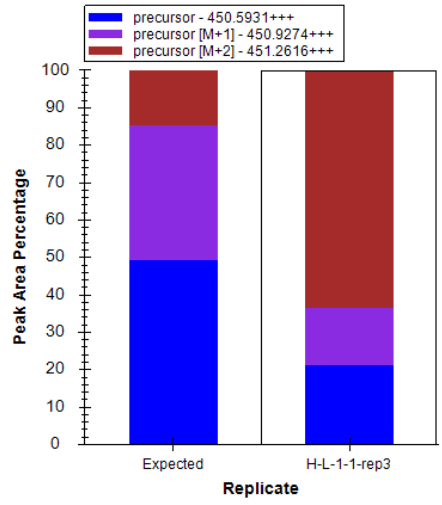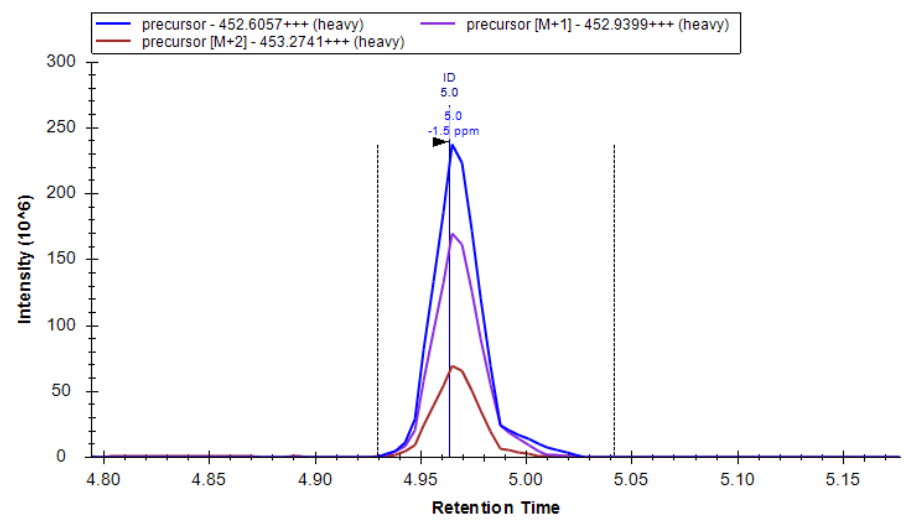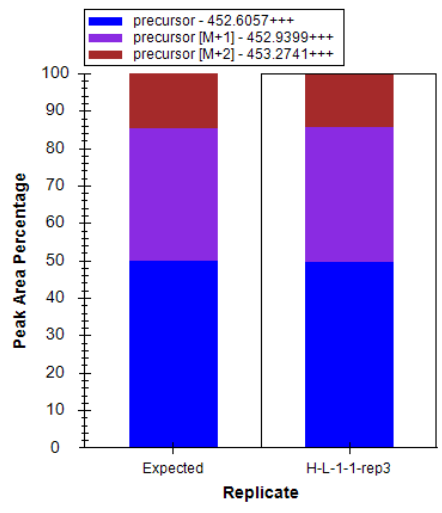

Replicate 3

# Histone H3

## K.SAPSTGGVdi**K**KPHR.Y [28, 40] (missed 1)

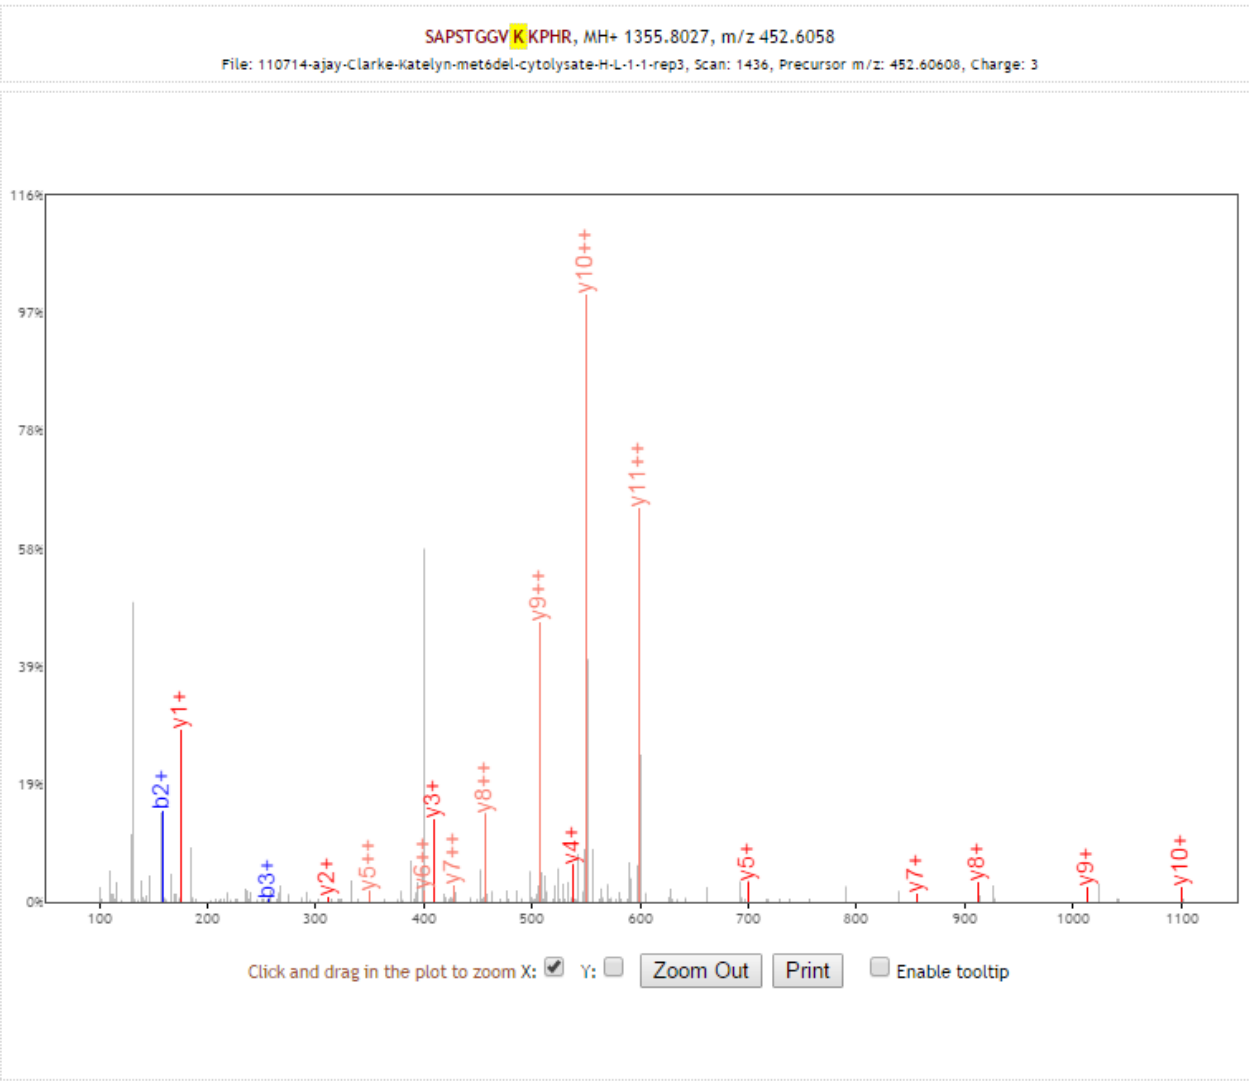

| b+        | b2+      | #  | Seq # | y+        | y2+      |
|-----------|----------|----|-------|-----------|----------|
| 88.0393   | 44.5233  | 1  | S 13  |           |          |
| 159.0764  | 80.0418  | 2  | A 12  | 1268.7707 | 634.8890 |
| 256.1292  | 128.5682 | 3  | P 11  | 1197.7336 | 599.3704 |
| 343.1612  | 172.0842 | 4  | S 10  | 1100.6808 | 550.8440 |
| 444.2089  | 222.6081 | 5  | T 9   | 1013.6488 | 507.3280 |
| 501.2304  | 251.1188 | 6  | G 8   | 912.6011  | 456.8042 |
| 558.2518  | 279.6295 | 7  | G 7   | 855.5796  | 428.2935 |
| 657.3202  | 329.1638 | 8  | V 6   | 798.5582  | 399.7827 |
| 819.4844  | 410.2458 | 9  | K 5   | 699.4898  | 350.2485 |
| 947.5794  | 474.2933 | 10 | K 4   | 537.3256  | 269.1664 |
| 1044.6321 | 522.8197 | 11 | P 3   | 409.2306  | 205.1190 |
| 1181.6910 | 591.3492 | 12 | H 2   | 312.1779  | 156.5926 |
|           |          | 13 | R 1   | 175.1190  | 88.0631  |

[\[click\]](#) to move table

Static Modifications:  
 C: 57.02146  
 M: 3.0189

Variable Modifications:  
 K: 34.0692

# eEF1A

## K.STTTGHLIYmono**K**CGGIDK.R [20, 35] (missed 1)

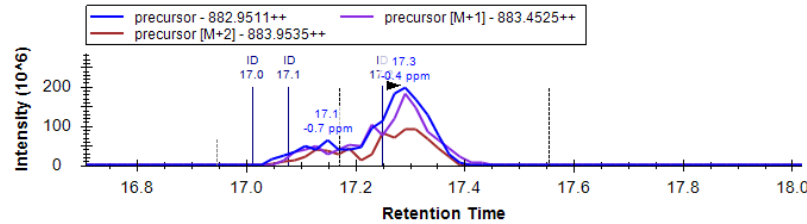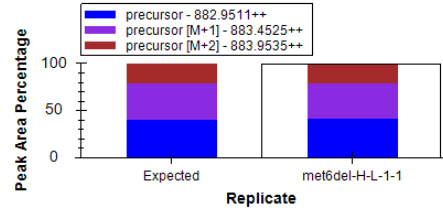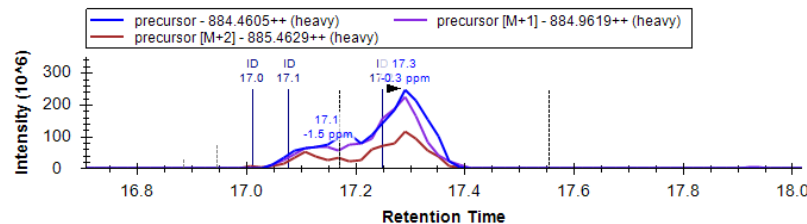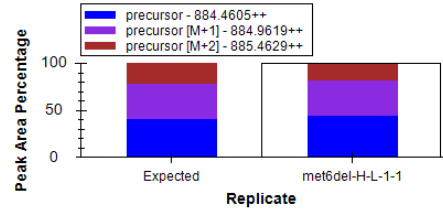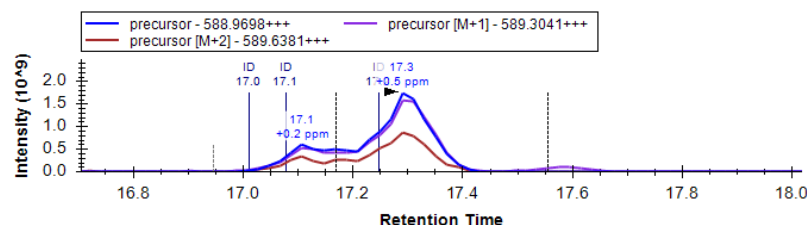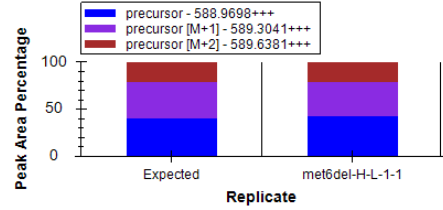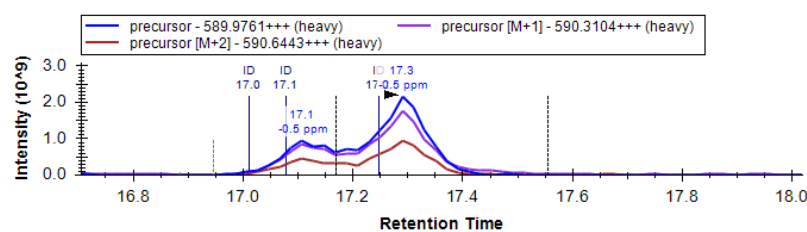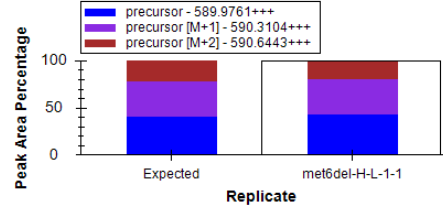



# eEF1A

K.STTTGHLIYmono**K**CGGIDK.R [20, 35] (missed 1)

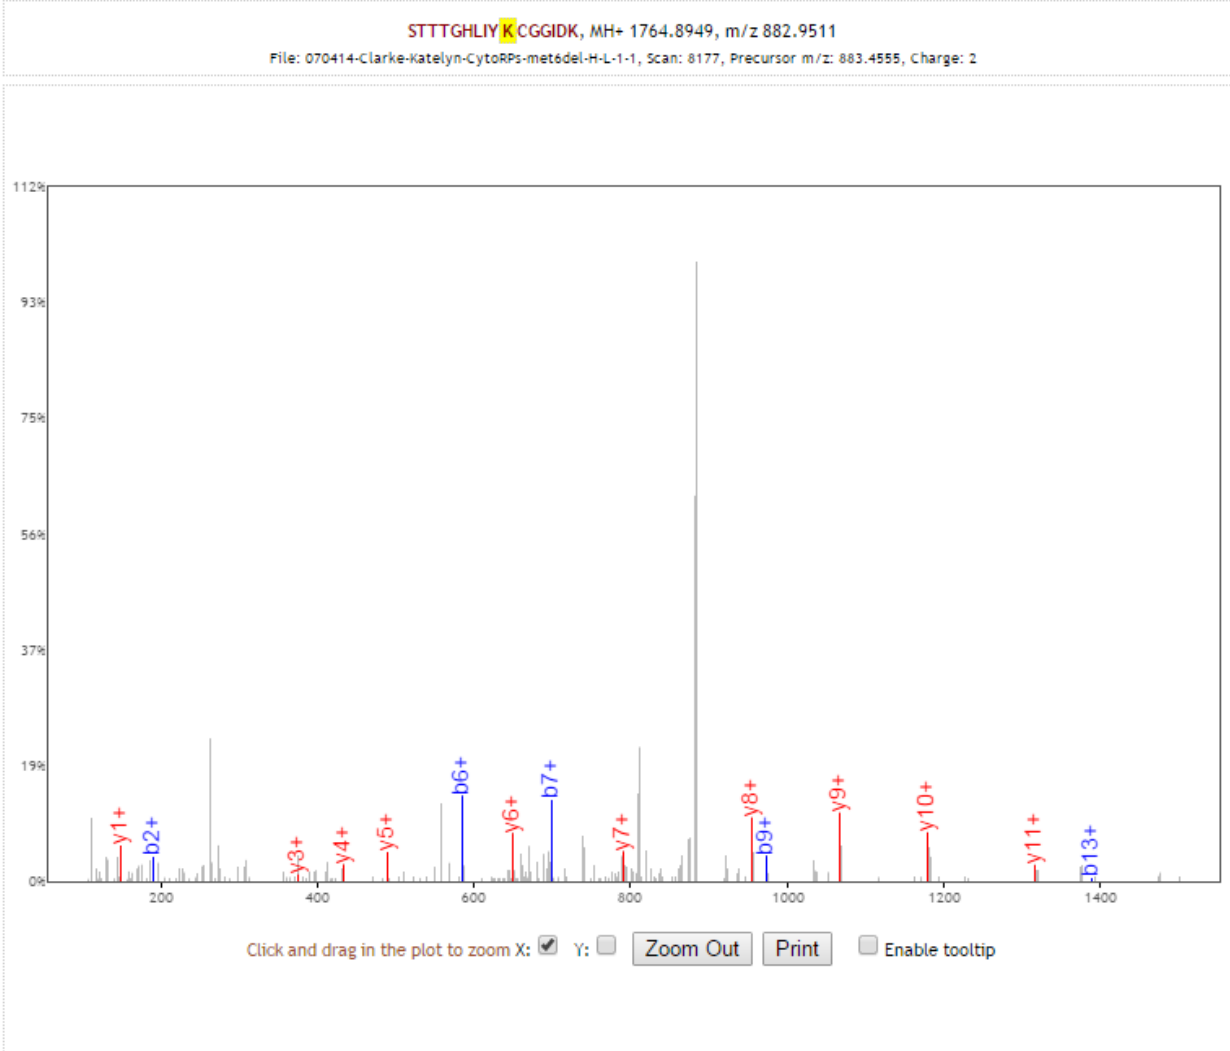

| b+        | #  | Seq # | y+        |
|-----------|----|-------|-----------|
| 88.0393   | 1  | S 16  |           |
| 189.0870  | 2  | T 15  | 1677.8629 |
| 290.1347  | 3  | T 14  | 1576.8152 |
| 391.1823  | 4  | T 13  | 1475.7676 |
| 448.2038  | 5  | G 12  | 1374.7199 |
| 585.2627  | 6  | H 11  | 1317.6984 |
| 698.3468  | 7  | L 10  | 1180.6395 |
| 811.4308  | 8  | I 9   | 1067.5554 |
| 974.4942  | 9  | Y 8   | 954.4714  |
| 1116.6048 | 10 | K 7   | 791.4080  |
| 1276.6355 | 11 | C 6   | 649.2974  |
| 1390.6784 | 13 | G 4   | 432.2453  |
| 1503.7625 | 14 | I 3   | 375.2238  |
| 1618.7894 | 15 | D 2   | 262.1397  |
|           | 16 | K 1   | 147.1128  |

[\[click\]](#) to move table  
 Static Modifications:  
 C: 57.02146  
 Variable Modifications:  
 K: 14.0157

# eEF1A

## K.STTTGHLIYmono**K**CGGIDK.R [20, 35] (missed 1)

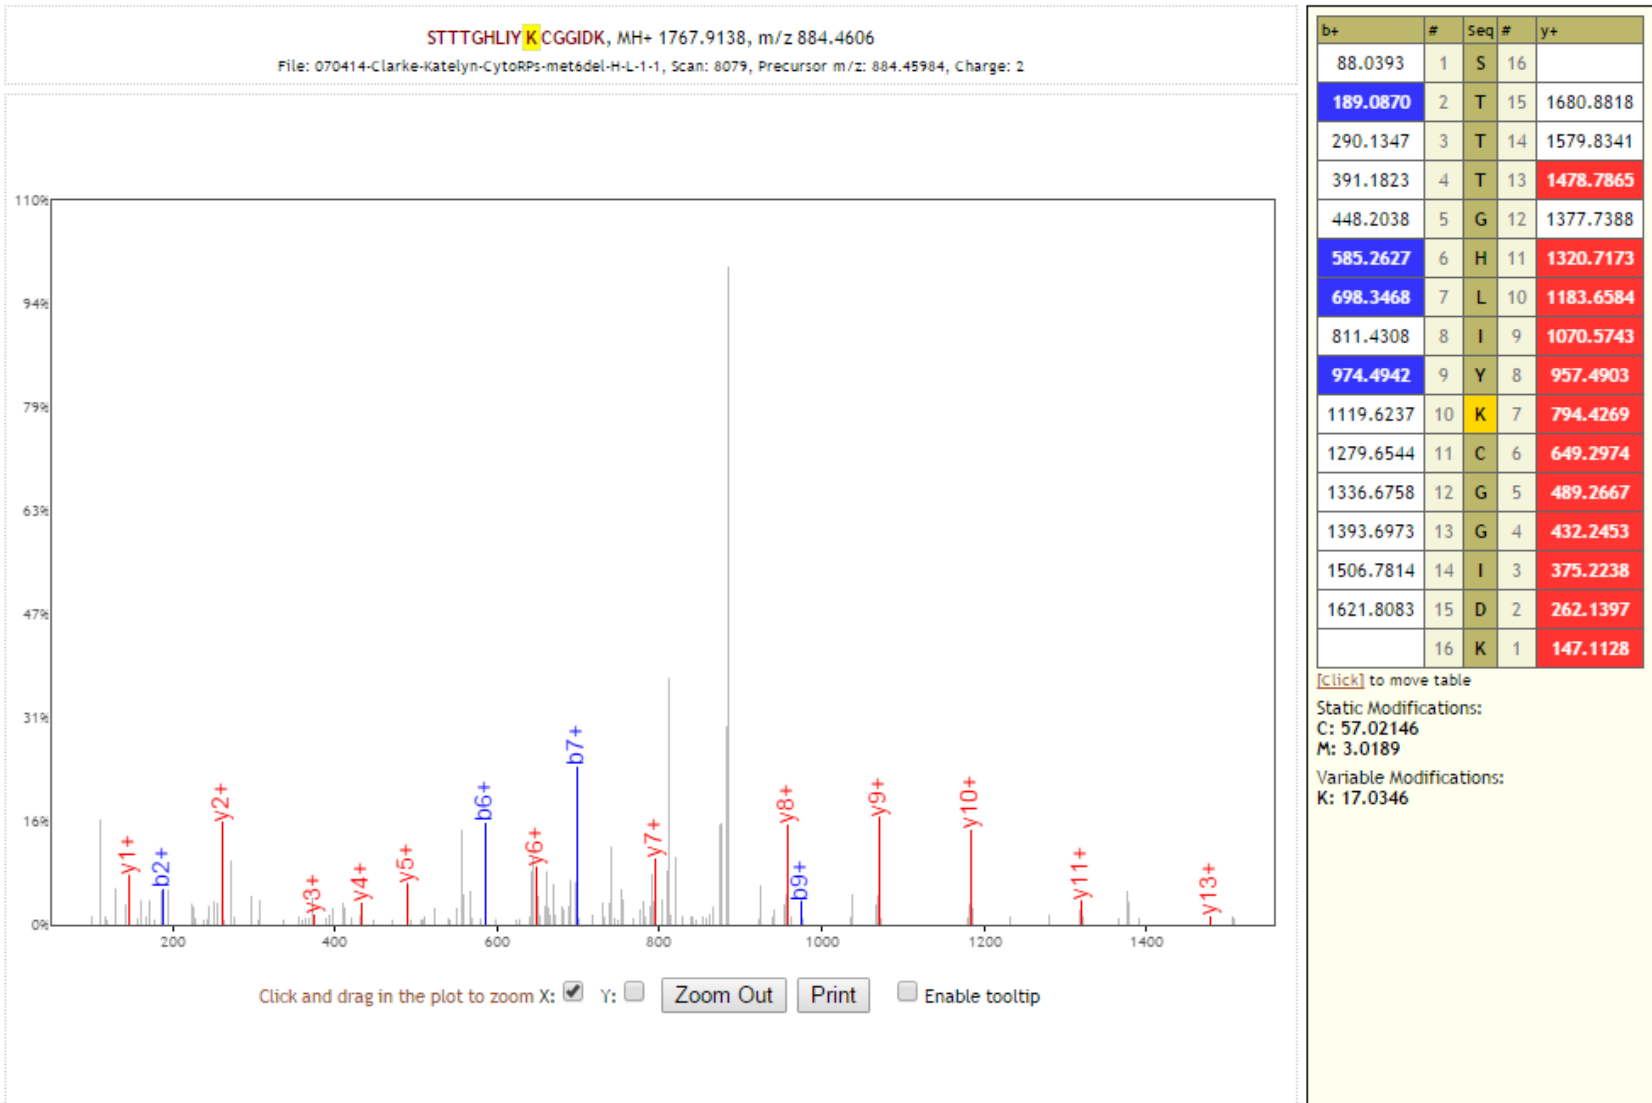

# eEF1A

## K.STTTGHLIYmono**K**CGGIDK.R [20, 35] (missed 1)

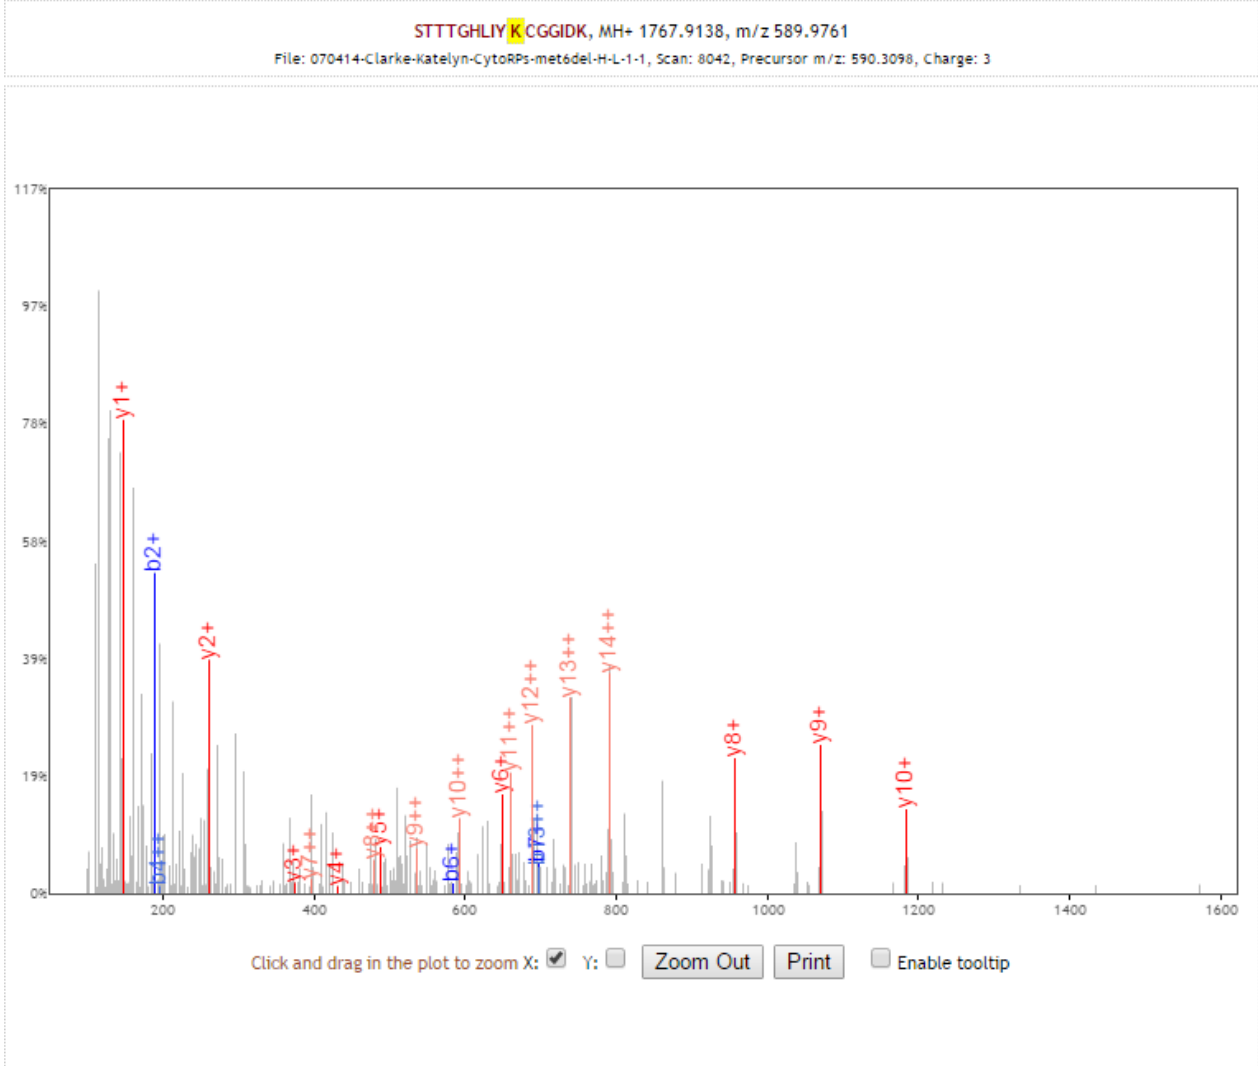

| b+              | b2+             | #  | Seq #      | y+               | y2+      |
|-----------------|-----------------|----|------------|------------------|----------|
| 88.0393         | 44.5233         | 1  | S 16       |                  |          |
| <b>189.0870</b> | 95.0471         | 2  | T 15       | 1680.8818        | 840.9445 |
| 290.1347        | 145.5710        | 3  | T 14       | 1579.8341        | 790.4207 |
| 391.1823        | <b>196.0948</b> | 4  | T 13       | 1478.7865        | 739.8969 |
| 448.2038        | 224.6055        | 5  | G 12       | 1377.7388        | 689.3730 |
| <b>585.2627</b> | 293.1350        | 6  | H 11       | 1320.7173        | 660.8623 |
| <b>698.3468</b> | 349.6770        | 7  | L 10       | <b>1183.6584</b> | 592.3328 |
| 811.4308        | 406.2191        | 8  | I 9        | <b>1070.5743</b> | 535.7908 |
| 974.4942        | 487.7507        | 9  | Y 8        | <b>957.4903</b>  | 479.2488 |
| 1119.6237       | 560.3155        | 10 | <b>K 7</b> | 794.4269         | 397.7171 |
| 1279.6544       | 640.3308        | 11 | C 6        | <b>649.2974</b>  | 325.1523 |
| 1336.6758       | 668.8416        | 12 | G 5        | <b>489.2667</b>  | 245.1370 |
| 1393.6973       | <b>697.3523</b> | 13 | G 4        | <b>432.2453</b>  | 216.6263 |
| 1506.7814       | 753.8943        | 14 | I 3        | <b>375.2238</b>  | 188.1155 |
| 1621.8083       | 811.4078        | 15 | D 2        | <b>262.1397</b>  | 131.5735 |
|                 |                 | 16 | K 1        | <b>147.1128</b>  | 74.0600  |

[Click] to move table  
 Static Modifications:  
 C: 57.02146  
 M: 3.0189  
 Variable Modifications:  
 K: 17.0346

# eEF1A

K.STTTGHLIYmono**K**CGGIDK.R [20, 35] (missed 1)

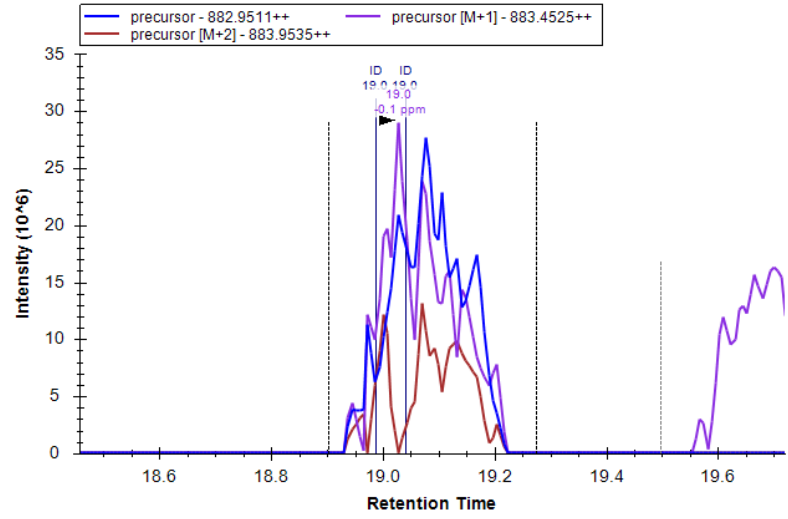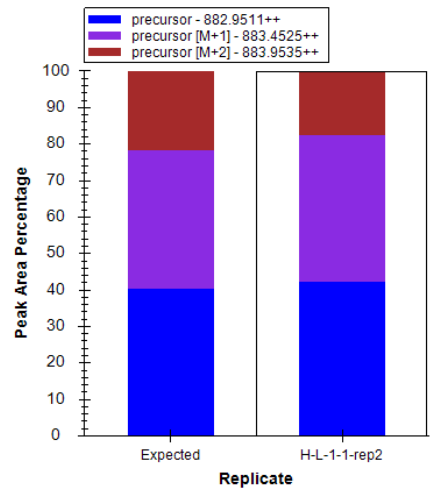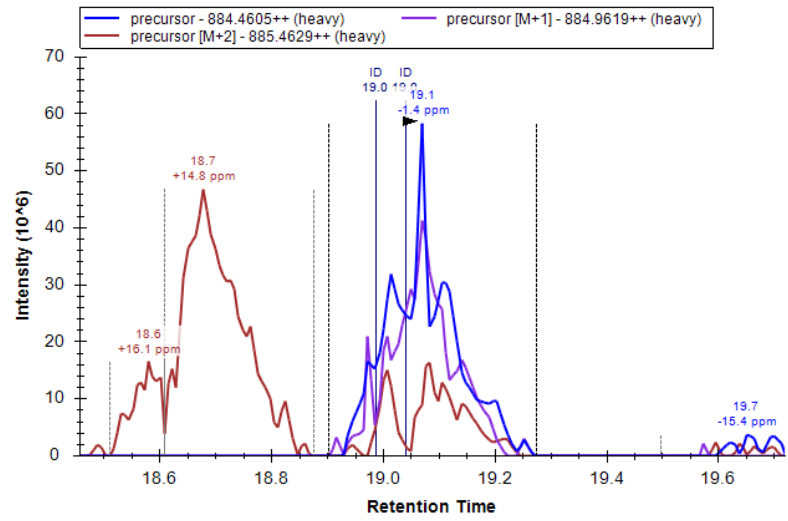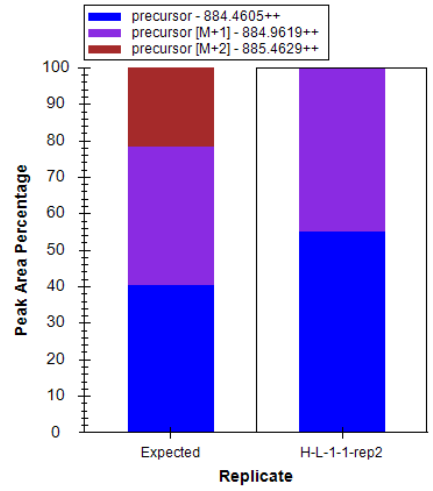

Replicate 2

# eEF1A

## K.STTTGHLIYmono**K**CGGIDK.R [20, 35] (missed 1)

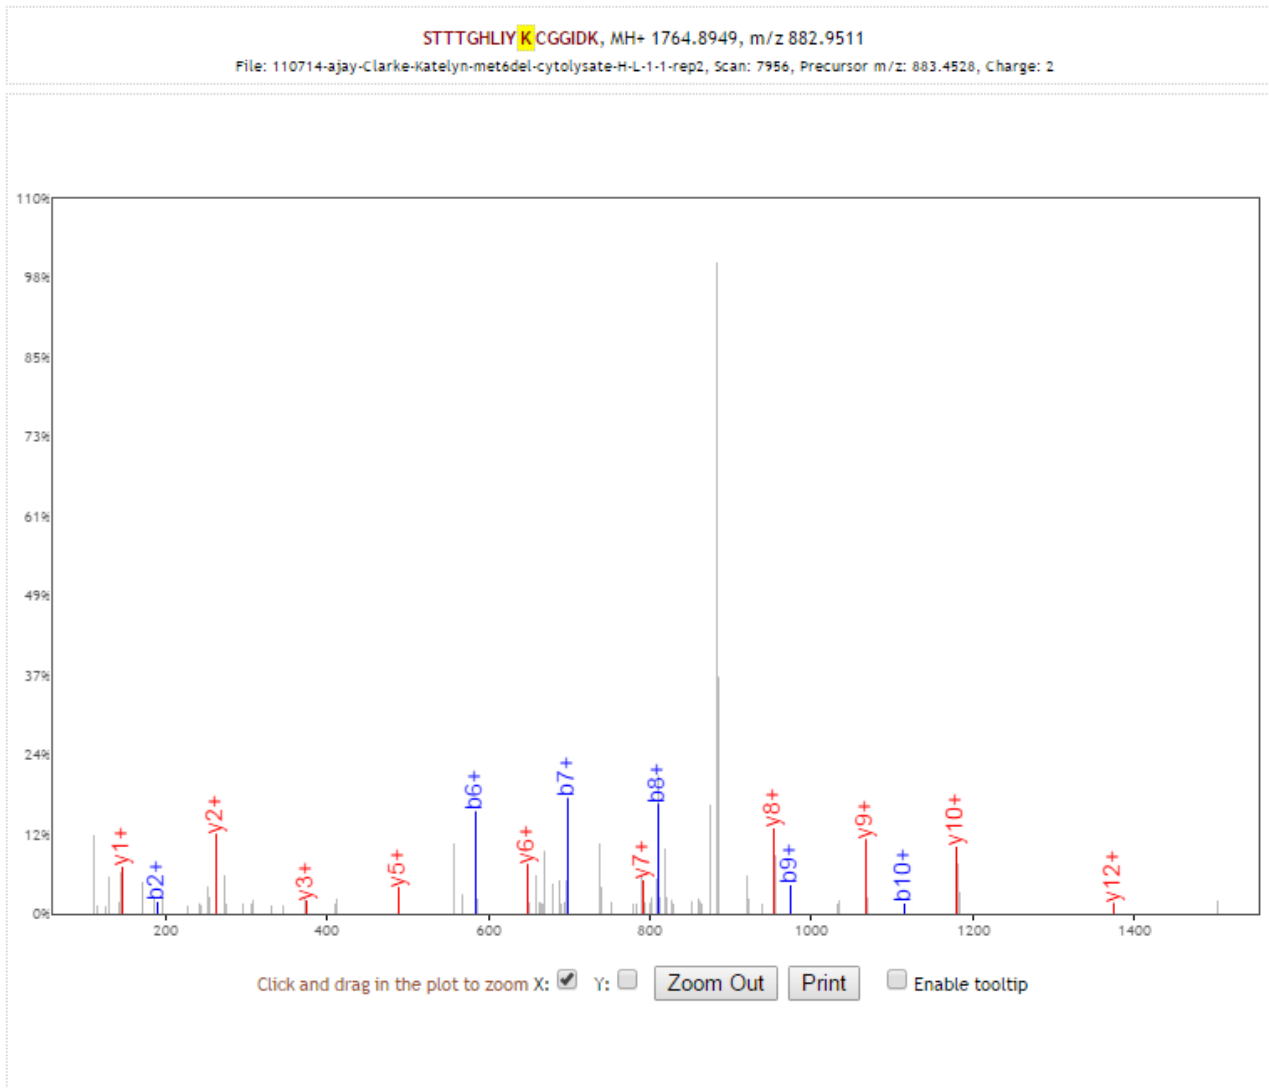

| b+        | #  | Seq #      | y+        |
|-----------|----|------------|-----------|
| 88.0393   | 1  | S 16       |           |
| 189.0870  | 2  | T 15       | 1677.8629 |
| 290.1347  | 3  | T 14       | 1576.8152 |
| 391.1823  | 4  | T 13       | 1475.7676 |
| 448.2038  | 5  | G 12       | 1374.7199 |
| 585.2627  | 6  | H 11       | 1317.6984 |
| 698.3468  | 7  | L 10       | 1180.6395 |
| 811.4308  | 8  | I 9        | 1067.5554 |
| 974.4942  | 9  | Y 8        | 954.4714  |
| 1116.6048 | 10 | <b>K</b> 7 | 791.4080  |
| 1276.6355 | 11 | C 6        | 649.2974  |
| 1333.6569 | 12 | G 5        | 489.2667  |
| 1390.6784 | 13 | G 4        | 432.2453  |
| 1503.7625 | 14 | I 3        | 375.2238  |
| 1618.7894 | 15 | D 2        | 262.1397  |
|           | 16 | K 1        | 147.1128  |

[\[click\]](#) to move table

Static Modifications:  
C: 57.02146

Variable Modifications:  
K: 14.0157

# eEF1A

K.STTTGHLIY**K**CGGIDK.R [20, 35] (missed 1)

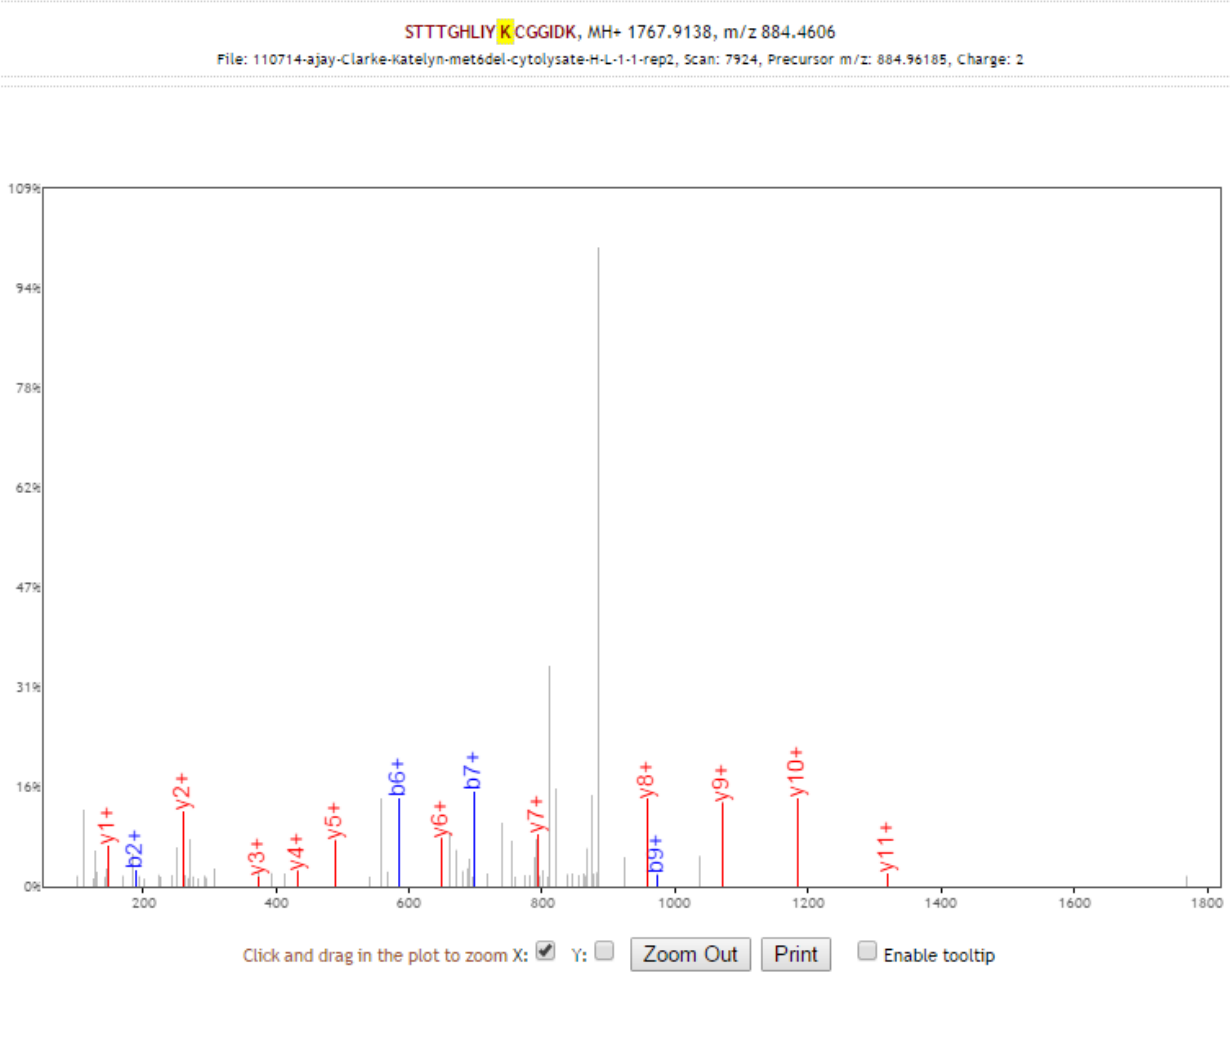

| b+        | #  | Seq #      | y+        |
|-----------|----|------------|-----------|
| 88.0393   | 1  | S 16       |           |
| 189.0870  | 2  | T 15       | 1680.8818 |
| 290.1347  | 3  | T 14       | 1579.8341 |
| 391.1823  | 4  | T 13       | 1478.7865 |
| 448.2038  | 5  | G 12       | 1377.7388 |
| 585.2627  | 6  | H 11       | 1320.7173 |
| 698.3468  | 7  | L 10       | 1183.6584 |
| 811.4308  | 8  | I 9        | 1070.5743 |
| 974.4942  | 9  | Y 8        | 957.4903  |
| 1119.6237 | 10 | <b>K</b> 7 | 794.4269  |
| 1279.6544 | 11 | C 6        | 649.2974  |
| 1336.6758 | 12 | G 5        | 489.2667  |
| 1393.6973 | 13 | G 4        | 432.2453  |
| 1506.7814 | 14 | I 3        | 375.2238  |
| 1621.8083 | 15 | D 2        | 262.1397  |
|           | 16 | K 1        | 147.1128  |

[\[click\]](#) to move table

Static Modifications:  
 C: 57.02146  
 M: 3.0189

Variable Modifications:  
 K: 17.0346

# eEF1A

## K.STTTGHLIYmono**K**CGGIDK.R [20, 35] (missed 1)

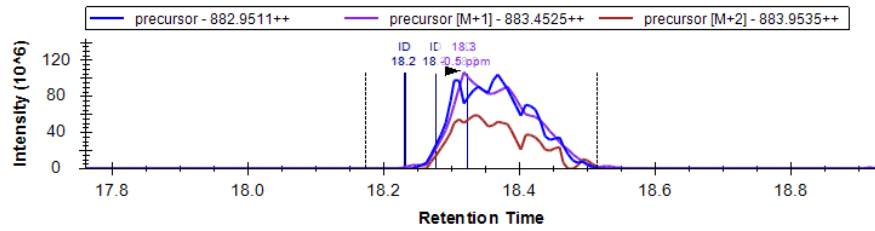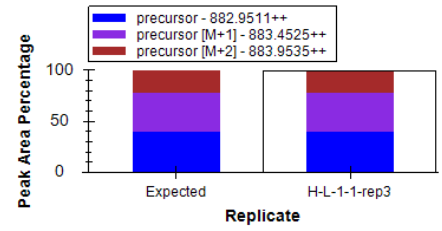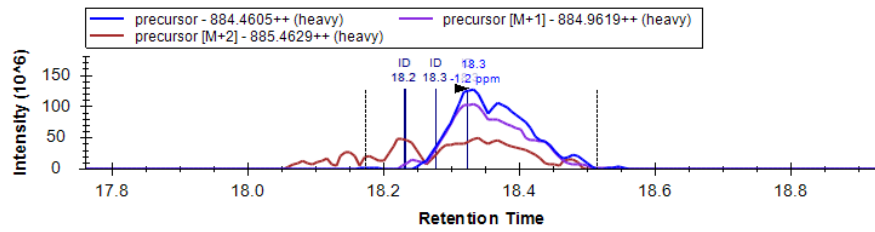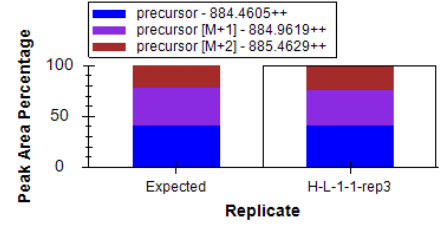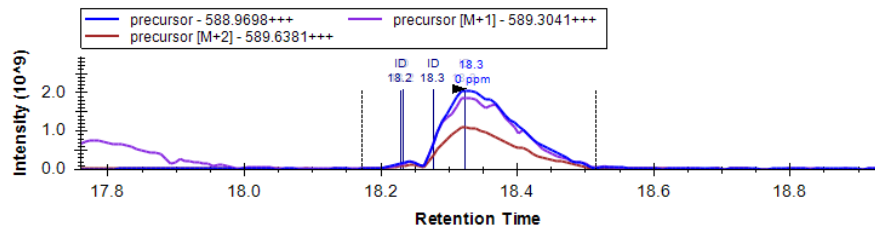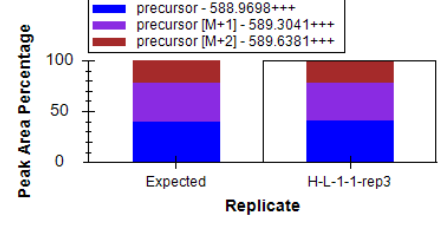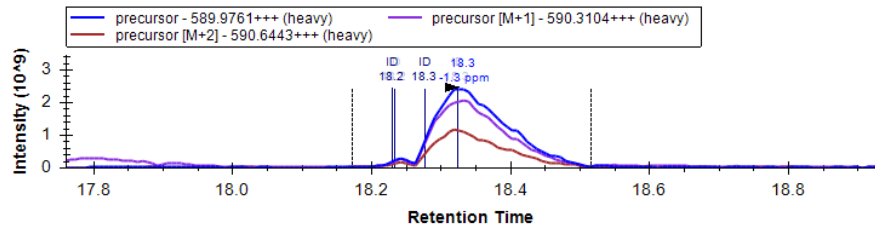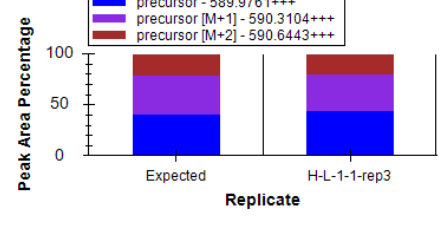

Replicate 3

# eEF1A

## K.STTTGHLIYmono**K**CGGIDK.R [20, 35] (missed 1)

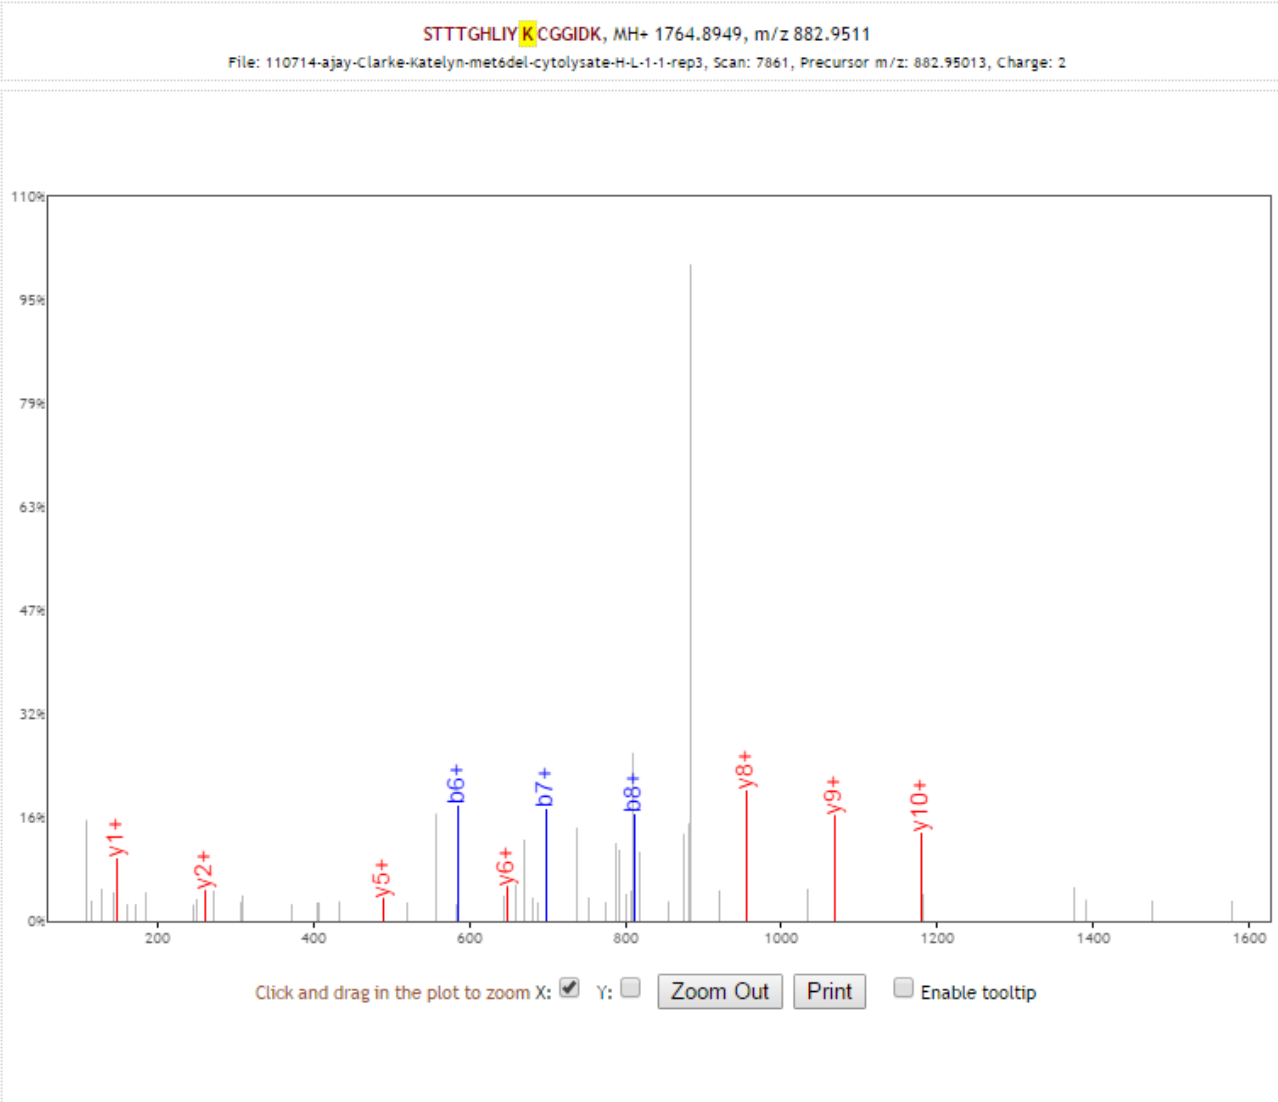

| b+        | #  | Seq # | y+        |
|-----------|----|-------|-----------|
| 88.0393   | 1  | S 16  |           |
| 189.0870  | 2  | T 15  | 1677.8629 |
| 290.1347  | 3  | T 14  | 1576.8152 |
| 391.1823  | 4  | T 13  | 1475.7676 |
| 448.2038  | 5  | G 12  | 1374.7199 |
| 585.2627  | 6  | H 11  | 1317.6984 |
| 698.3468  | 7  | L 10  | 1180.6395 |
| 811.4308  | 8  | I 9   | 1067.5554 |
| 974.4942  | 9  | Y 8   | 954.4714  |
| 1116.6048 | 10 | K 7   | 791.4080  |
| 1276.6355 | 11 | C 6   | 649.2974  |
| 1333.6569 | 12 | G 5   | 489.2667  |
| 1390.6784 | 13 | G 4   | 432.2453  |
| 1503.7625 | 14 | I 3   | 375.2238  |
| 1618.7894 | 15 | D 2   | 262.1397  |
|           | 16 | K 1   | 147.1128  |

[\[Click\]](#) to move table

Static Modifications:  
 C: 57.02146

Variable Modifications:  
 K: 14.0157



# eEF1A

K.STTTGHLIY**K**CGGIDK.R [20, 35] (missed 1)

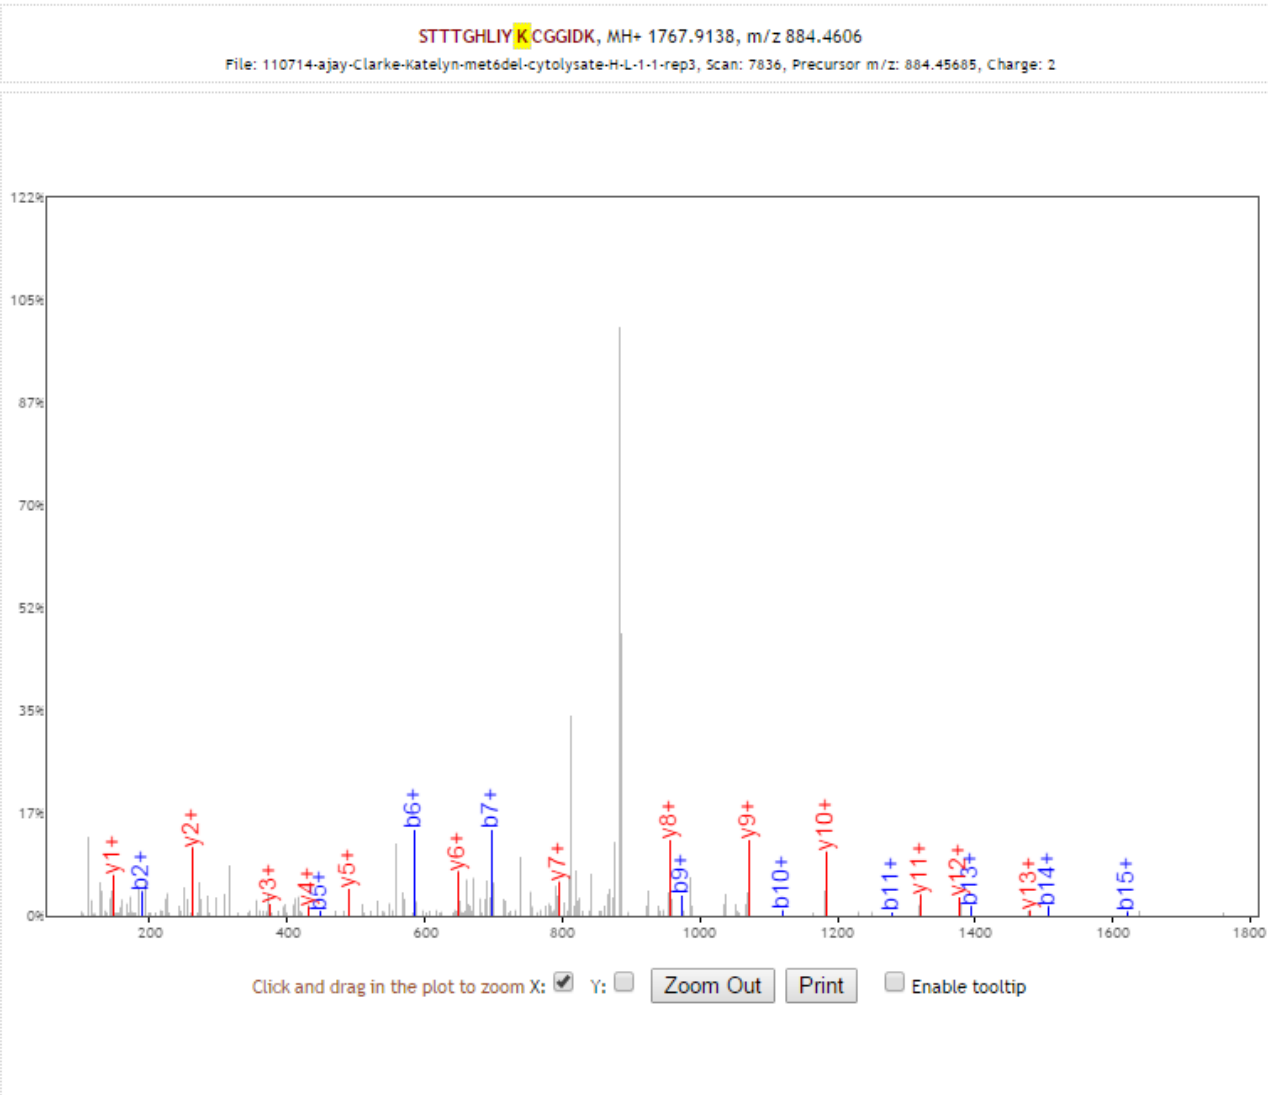

| b+        | #  | Seq # | y+        |
|-----------|----|-------|-----------|
| 88.0393   | 1  | S 16  |           |
| 189.0870  | 2  | T 15  | 1680.8818 |
| 290.1347  | 3  | T 14  | 1579.8341 |
| 391.1823  | 4  | T 13  | 1478.7865 |
| 448.2038  | 5  | G 12  | 1377.7388 |
| 585.2627  | 6  | H 11  | 1320.7173 |
| 698.3468  | 7  | L 10  | 1183.6584 |
| 811.4308  | 8  | I 9   | 1070.5743 |
| 974.4942  | 9  | Y 8   | 957.4903  |
| 1119.6237 | 10 | K 7   | 794.4269  |
| 1279.6544 | 11 | C 6   | 649.2974  |
| 1336.6758 | 12 | G 5   | 489.2667  |
| 1393.6973 | 13 | G 4   | 432.2453  |
| 1506.7814 | 14 | I 3   | 375.2238  |
| 1621.8083 | 15 | D 2   | 262.1397  |
|           | 16 | K 1   | 147.1128  |

[\[Click\]](#) to move table

Static Modifications:  
 C: 57.02146  
 M: 3.0189

Variable Modifications:  
 K: 17.0346

# eEF1A

K.STTTGHLIY**K**CGGIDK.R [20, 35] (missed 1)

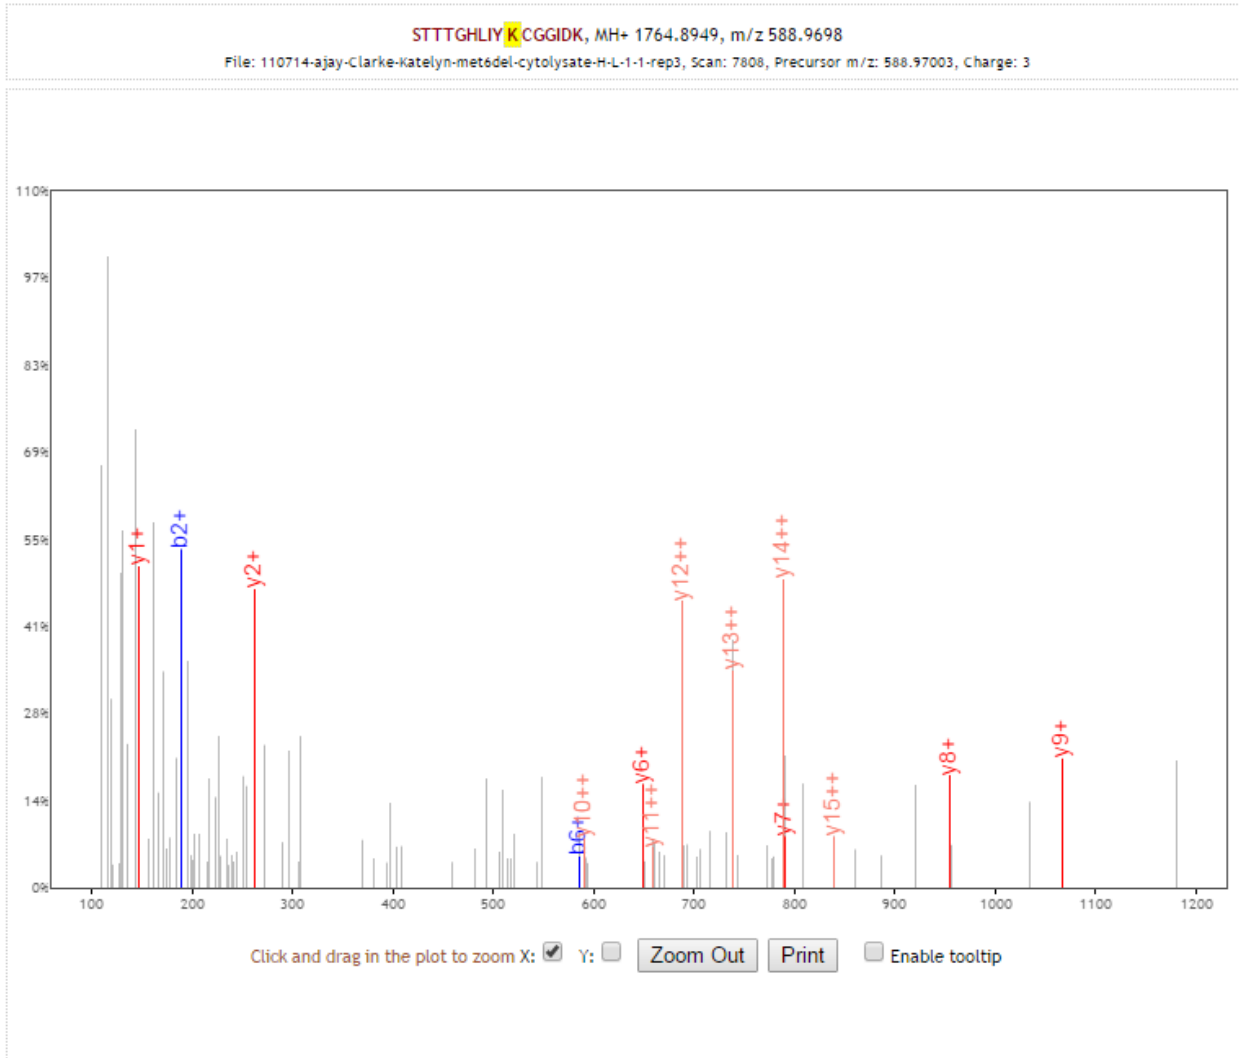

| b+              | b2+      | #  | Seq      | #  | y+               | y2+      |
|-----------------|----------|----|----------|----|------------------|----------|
| 88.0393         | 44.5233  | 1  | S        | 16 |                  |          |
| <b>189.0870</b> | 95.0471  | 2  | T        | 15 | 1677.8629        | 839.4351 |
| 290.1347        | 145.5710 | 3  | T        | 14 | 1576.8152        | 788.9113 |
| 391.1823        | 196.0948 | 4  | T        | 13 | 1475.7676        | 738.3874 |
| 448.2038        | 224.6055 | 5  | G        | 12 | 1374.7199        | 687.8636 |
| <b>585.2627</b> | 293.1350 | 6  | H        | 11 | 1317.6984        | 659.3528 |
| 698.3468        | 349.6770 | 7  | L        | 10 | 1180.6395        | 590.8234 |
| 811.4308        | 406.2191 | 8  | I        | 9  | <b>1067.5554</b> | 534.2814 |
| 974.4942        | 487.7507 | 9  | Y        | 8  | <b>954.4714</b>  | 477.7393 |
| 1116.6048       | 558.8061 | 10 | <b>K</b> | 7  | <b>791.4080</b>  | 396.2077 |
| 1276.6355       | 638.8214 | 11 | C        | 6  | <b>649.2974</b>  | 325.1523 |
| 1333.6569       | 667.3321 | 12 | G        | 5  | 489.2667         | 245.1370 |
| 1390.6784       | 695.8428 | 13 | G        | 4  | 432.2453         | 216.6263 |
| 1503.7625       | 752.3849 | 14 | I        | 3  | 375.2238         | 188.1155 |
| 1618.7894       | 809.8983 | 15 | D        | 2  | <b>262.1397</b>  | 131.5735 |
|                 |          | 16 | <b>K</b> | 1  | <b>147.1128</b>  | 74.0600  |

[\[click\]](#) to move table  
 Static Modifications:  
 C: 57.02146  
 Variable Modifications:  
 K: 14.0157

# eEF1A

## K.STTTGHLIYmonoKCGGIDK.R [20, 35] (missed 1)

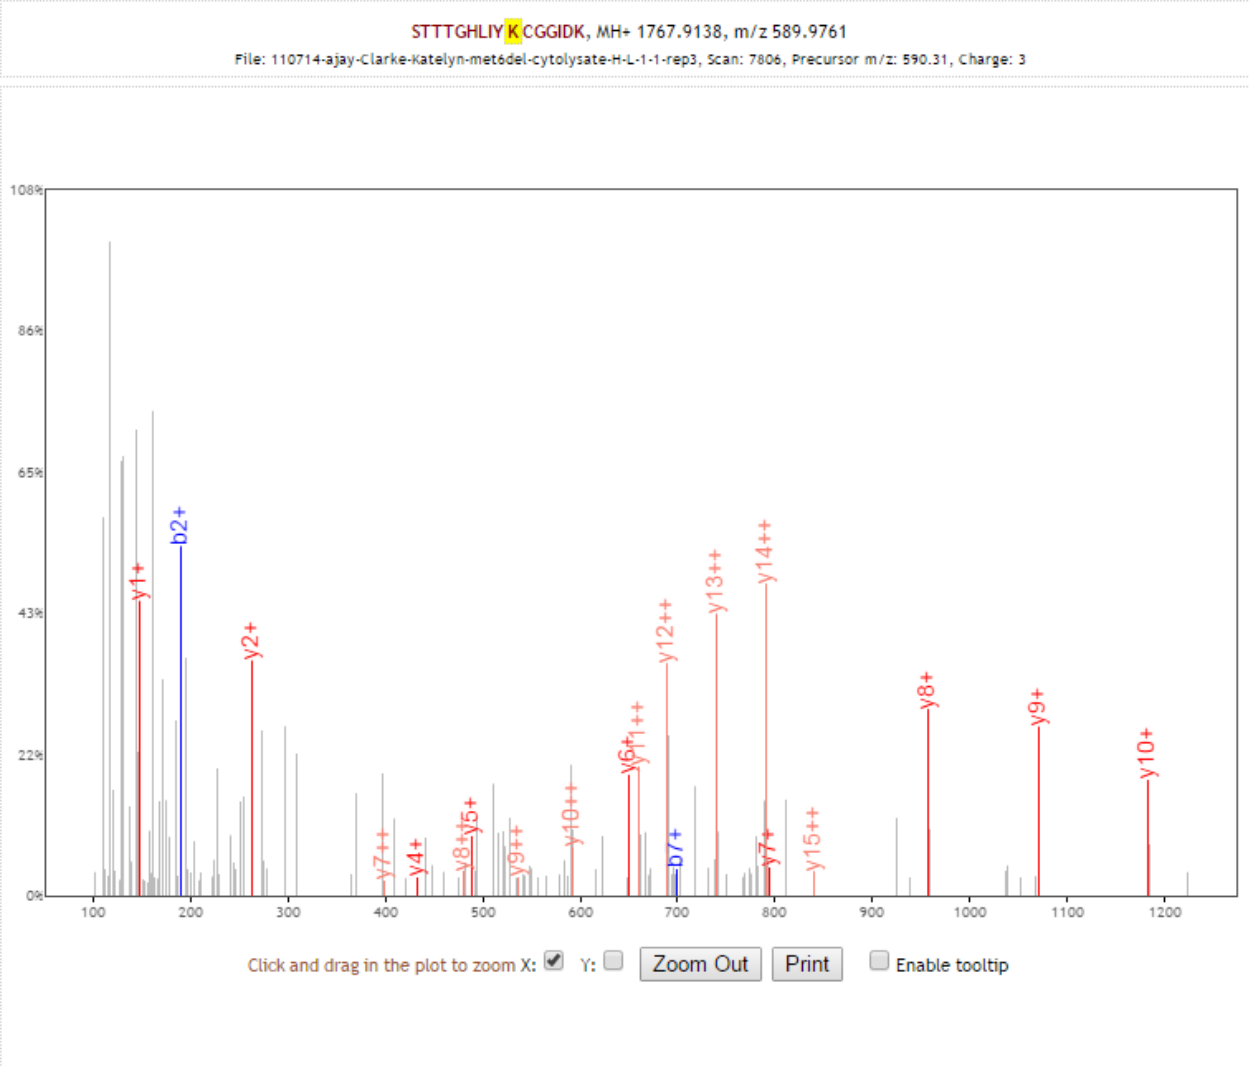

| b+              | b2+      | #  | Seq #      | y+               | y2+      |
|-----------------|----------|----|------------|------------------|----------|
| 88.0393         | 44.5233  | 1  | S 16       |                  |          |
| <b>189.0870</b> | 95.0471  | 2  | T 15       | 1680.8818        | 840.9445 |
| 290.1347        | 145.5710 | 3  | T 14       | 1579.8341        | 790.4207 |
| 391.1823        | 196.0948 | 4  | T 13       | 1478.7865        | 739.8969 |
| 448.2038        | 224.6055 | 5  | G 12       | 1377.7388        | 689.3730 |
| 585.2627        | 293.1350 | 6  | H 11       | 1320.7173        | 660.8623 |
| <b>698.3468</b> | 349.6770 | 7  | L 10       | <b>1183.6584</b> | 592.3328 |
| 811.4308        | 406.2191 | 8  | I 9        | <b>1070.5743</b> | 535.7908 |
| 974.4942        | 487.7507 | 9  | Y 8        | <b>957.4903</b>  | 479.2488 |
| 1119.6237       | 560.3155 | 10 | <b>K 7</b> | <b>794.4269</b>  | 397.7171 |
| 1279.6544       | 640.3308 | 11 | C 6        | <b>649.2974</b>  | 325.1523 |
| 1336.6758       | 668.8416 | 12 | G 5        | <b>489.2667</b>  | 245.1370 |
| 1393.6973       | 697.3523 | 13 | G 4        | <b>432.2453</b>  | 216.6263 |
| 1506.7814       | 753.8943 | 14 | I 3        | 375.2238         | 188.1155 |
| 1621.8083       | 811.4078 | 15 | D 2        | <b>262.1397</b>  | 131.5735 |
|                 |          | 16 | K 1        | <b>147.1128</b>  | 74.0600  |

[\[click\]](#) to move table  
 Static Modifications:  
 C: 57.02146  
 M: 3.0189  
 Variable Modifications:  
 K: 17.0346

# eEF1A

## K.STTTGHLIYmono**K**CGGIDKR.T [20, 36] (missed 2)

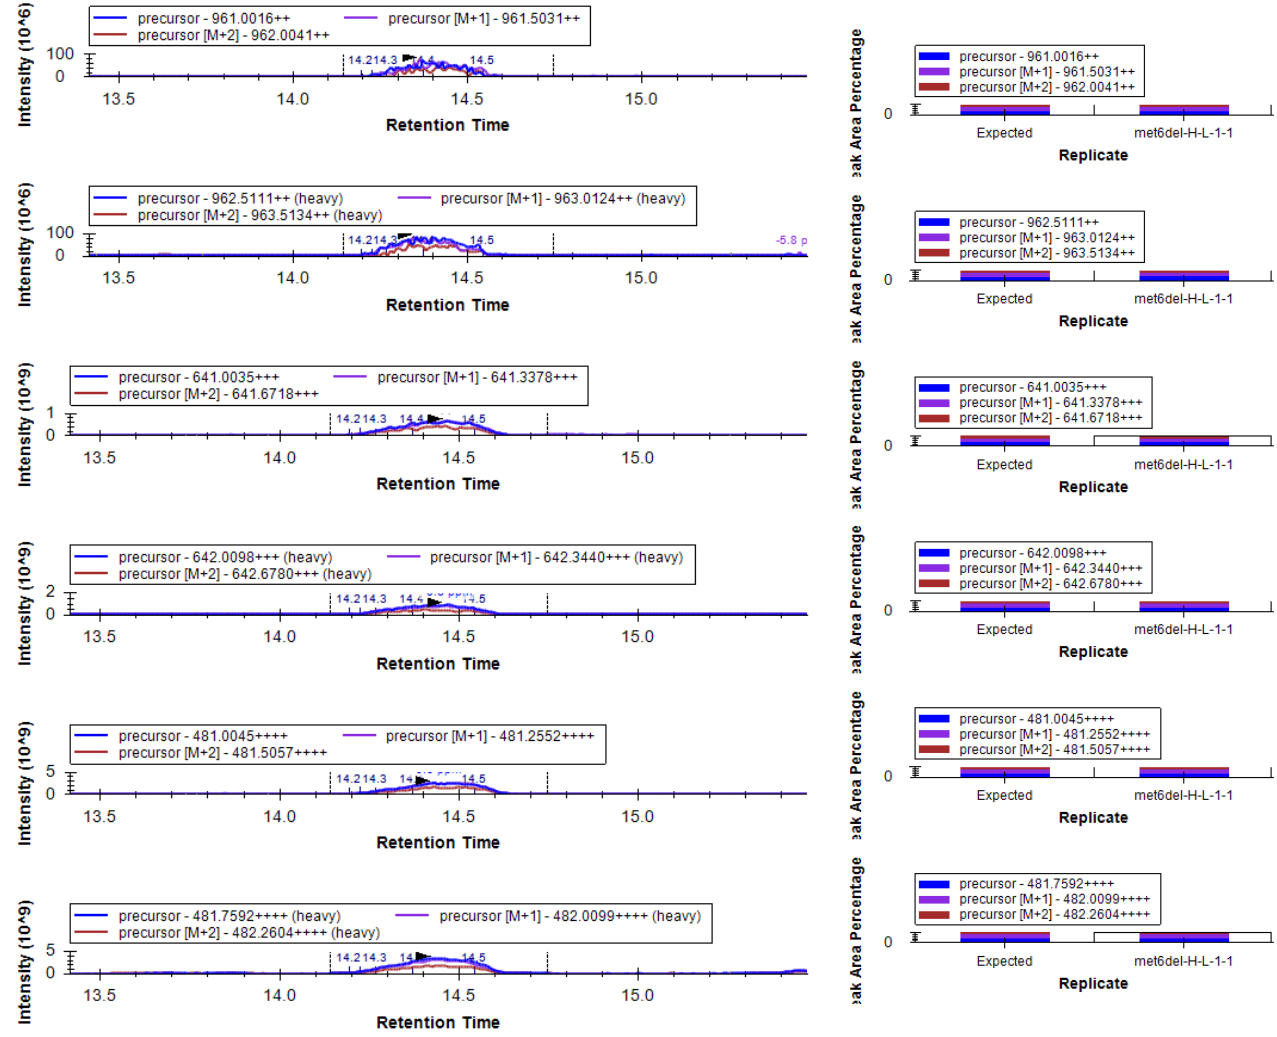

# eEF1A

## K.STTTGHLIYmono**K**CGGIDKR.T [20, 36] (missed 2)

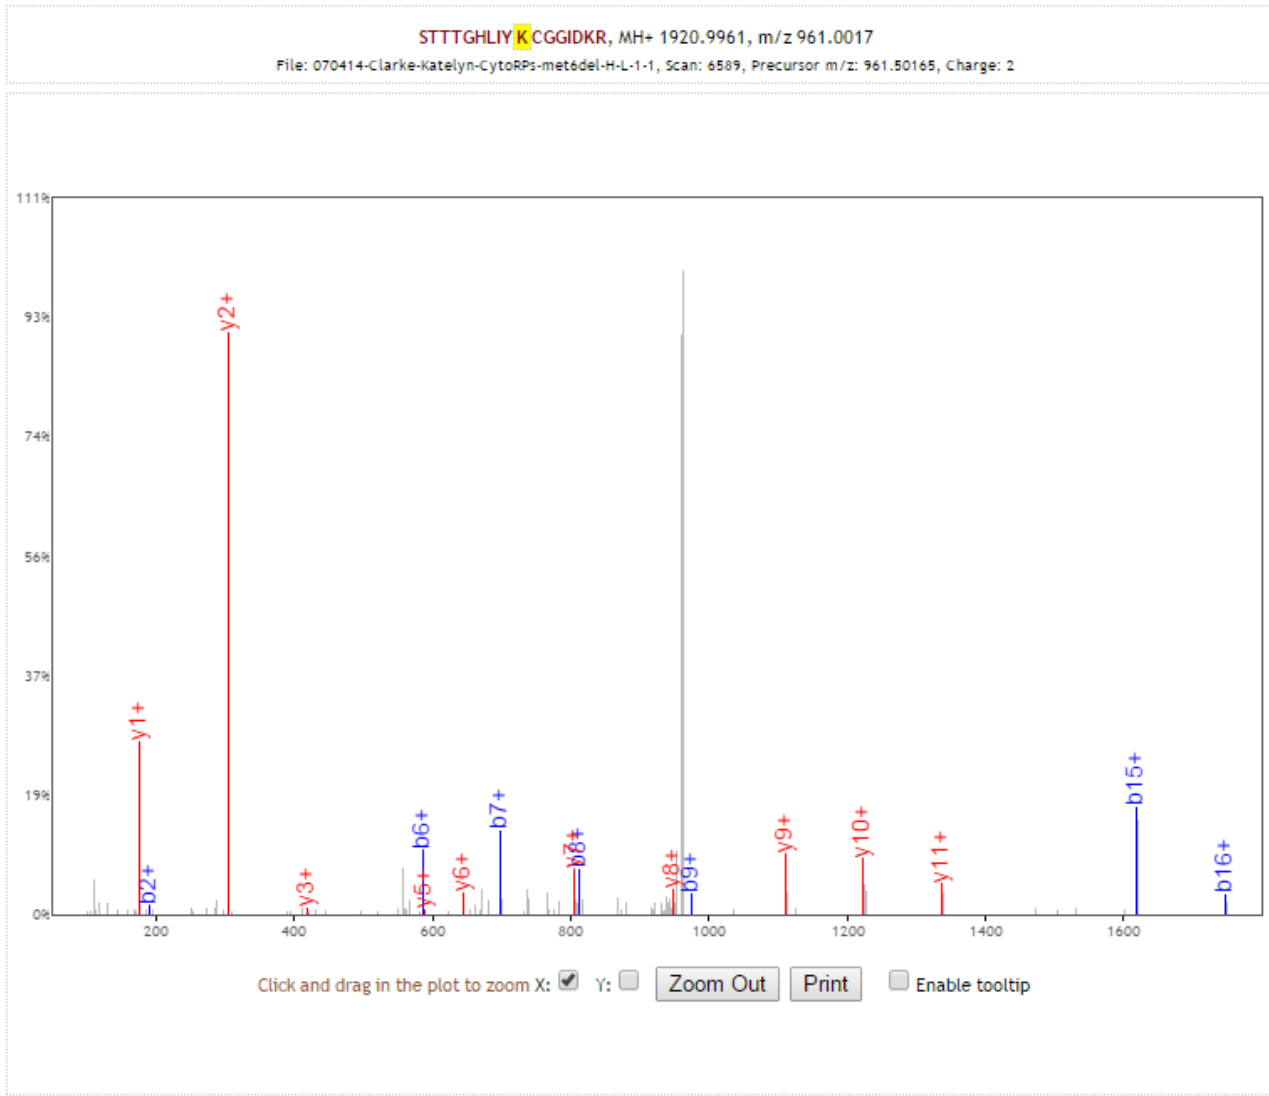

| b+        | #  | Seq #      | y+        |
|-----------|----|------------|-----------|
| 88.0393   | 1  | S 17       |           |
| 189.0870  | 2  | T 16       | 1833.9640 |
| 290.1347  | 3  | T 15       | 1732.9163 |
| 391.1823  | 4  | T 14       | 1631.8687 |
| 448.2038  | 5  | G 13       | 1530.8210 |
| 585.2627  | 6  | H 12       | 1473.7995 |
| 698.3468  | 7  | L 11       | 1336.7406 |
| 811.4308  | 8  | I 10       | 1223.6565 |
| 974.4942  | 9  | Y 9        | 1110.5725 |
| 1116.6048 | 10 | <b>K</b> 8 | 947.5092  |
| 1276.6355 | 11 | C 7        | 805.3985  |
| 1333.6569 | 12 | G 6        | 645.3678  |
| 1390.6784 | 13 | G 5        | 588.3464  |
| 1503.7625 | 14 | I 4        | 531.3249  |
| 1618.7894 | 15 | D 3        | 418.2409  |
| 1746.8844 | 16 | K 2        | 303.2139  |
|           | 17 | R 1        | 175.1190  |

[\[Click\]](#) to move table

Static Modifications:  
 C: 57.02146

Variable Modifications:  
 K: 14.0157

# eEF1A

K.STTTGHLIY**K**CGGIDKR.T [20, 36] (missed 2)

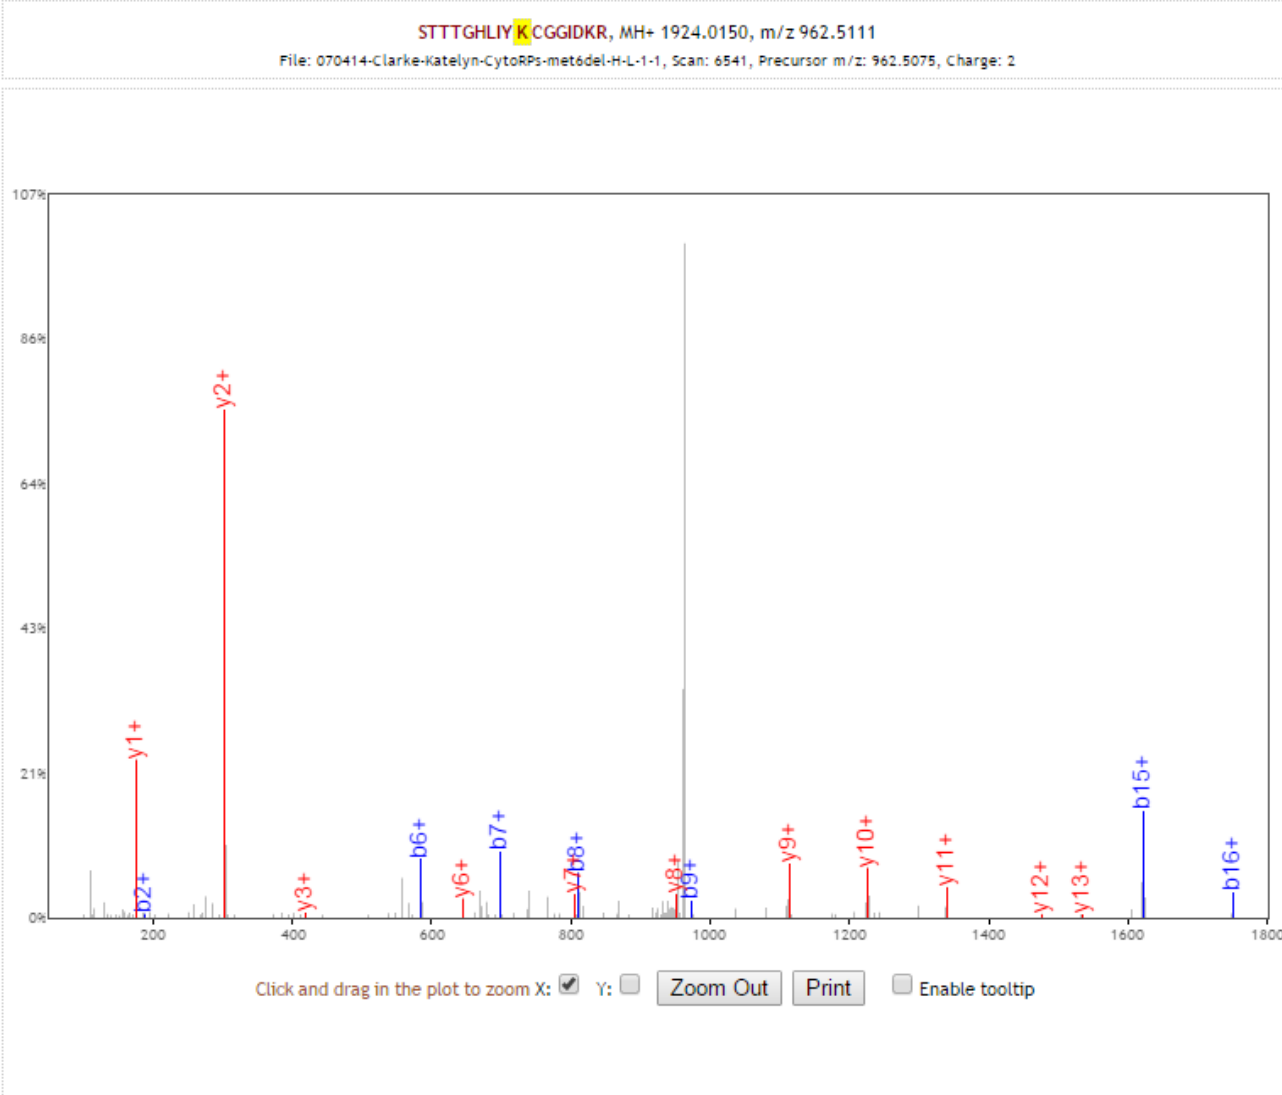

| b+        | #  | Seq #      | y+        |
|-----------|----|------------|-----------|
| 88.0393   | 1  | S 17       |           |
| 189.0870  | 2  | T 16       | 1836.9829 |
| 290.1347  | 3  | T 15       | 1735.9352 |
| 391.1823  | 4  | T 14       | 1634.8876 |
| 448.2038  | 5  | G 13       | 1533.8399 |
| 585.2627  | 6  | H 12       | 1476.8184 |
| 698.3468  | 7  | L 11       | 1339.7595 |
| 811.4308  | 8  | I 10       | 1226.6754 |
| 974.4942  | 9  | Y 9        | 1113.5914 |
| 1119.6237 | 10 | <b>K</b> 8 | 950.5281  |
| 1279.6544 | 11 | C 7        | 805.3985  |
| 1336.6758 | 12 | G 6        | 645.3678  |
| 1393.6973 | 13 | G 5        | 588.3464  |
| 1506.7814 | 14 | I 4        | 531.3249  |
| 1621.8083 | 15 | D 3        | 418.2409  |
| 1749.9033 | 16 | K 2        | 303.2139  |
|           | 17 | R 1        | 175.1190  |

[\[Click\]](#) to move table

Static Modifications:  
 C: 57.02146  
 M: 3.0189

Variable Modifications:  
 K: 17.0346

# eEF1A

## K.STTTGHLIYmono**K**CGGIDKR.T [20, 36] (missed 2)

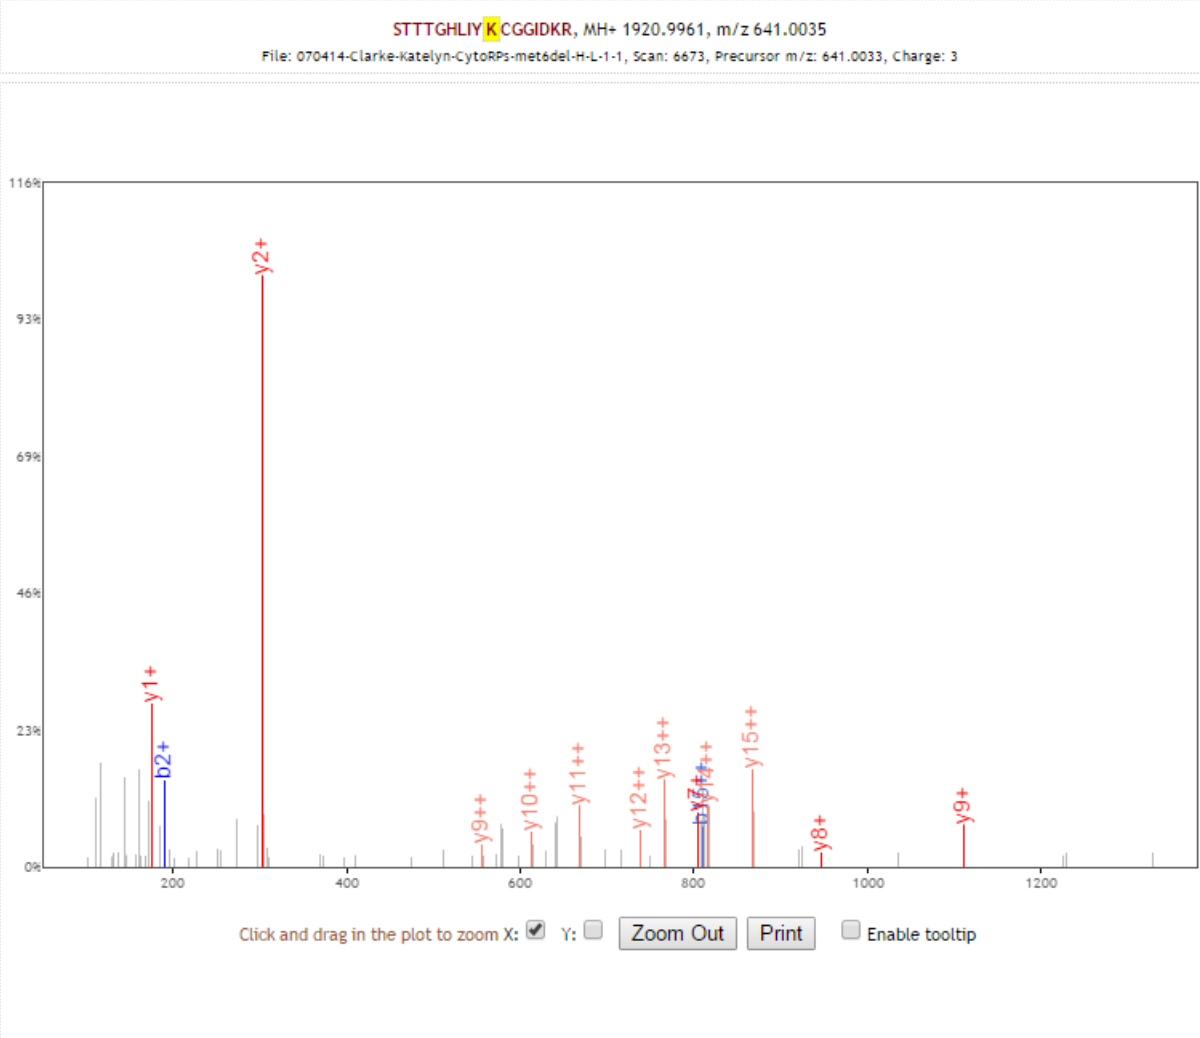

| b+              | b2+             | #  | Seq #      | y+               | y2+             |
|-----------------|-----------------|----|------------|------------------|-----------------|
| 88.0393         | 44.5233         | 1  | S 17       |                  |                 |
| <b>189.0870</b> | 95.0471         | 2  | T 16       | 1833.9640        | 917.4857        |
| 290.1347        | 145.5710        | 3  | T 15       | 1732.9163        | <b>866.9618</b> |
| 391.1823        | 196.0948        | 4  | T 14       | 1631.8687        | <b>816.4380</b> |
| 448.2038        | 224.6055        | 5  | G 13       | 1530.8210        | <b>765.9141</b> |
| 585.2627        | 293.1350        | 6  | H 12       | 1473.7995        | <b>737.4034</b> |
| 698.3468        | 349.6770        | 7  | L 11       | 1336.7406        | <b>668.8739</b> |
| 811.4308        | 406.2191        | 8  | I 10       | 1223.6565        | <b>612.3319</b> |
| 974.4942        | 487.7507        | 9  | Y 9        | <b>1110.5725</b> | <b>555.7899</b> |
| 1116.6048       | 558.8061        | 10 | <b>K</b> 8 | <b>947.5092</b>  | 474.2582        |
| 1276.6355       | 638.8214        | 11 | C 7        | <b>805.3985</b>  | 403.2029        |
| 1333.6569       | 667.3321        | 12 | G 6        | 645.3678         | 323.1876        |
| 1390.6784       | 695.8428        | 13 | G 5        | 588.3464         | 294.6768        |
| 1503.7625       | 752.3849        | 14 | I 4        | 531.3249         | 266.1661        |
| 1618.7894       | <b>809.8983</b> | 15 | D 3        | 418.2409         | 209.6241        |
| 1746.8844       | 873.9458        | 16 | K 2        | <b>303.2139</b>  | 152.1106        |
|                 |                 | 17 | R 1        | <b>175.1190</b>  | 88.0631         |

[\[Click\]](#) to move table

Static Modifications:  
 C: 57.02146

Variable Modifications:  
 K: 14.0157

# eEF1A

## K.STTTGHLIYmonoKCGGIDKR.T [20, 36] (missed 2)

STTTGHLIYKCGGIDKR, MH+ 1924.0150, m/z 642.0098

File: 070414-Clarke-Katelyn-CytoRPs-met6del-H-L-1-1, Scan: 6501, Precursor m/z: 642.3438, Charge: 3

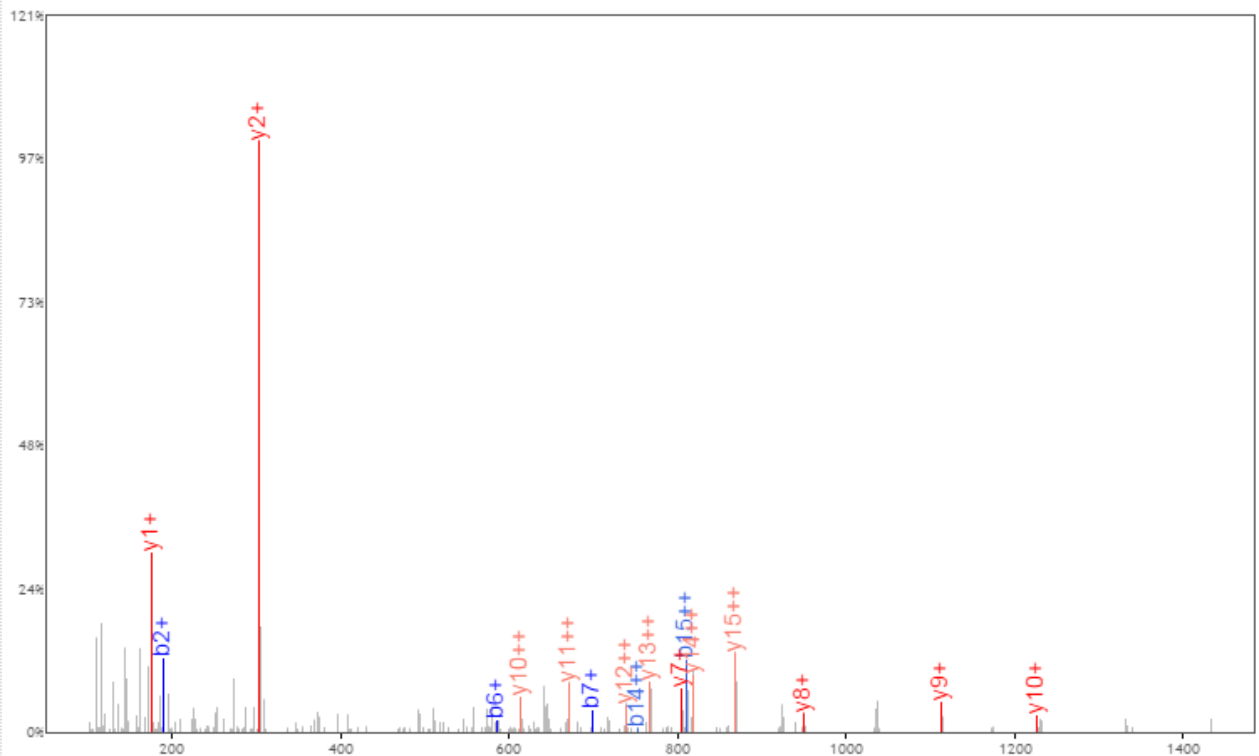

Click and drag in the plot to zoom X:  Y:     Enable tooltip

| b+        | b2+      | #  | Seq | #  | y+        | y2+      |
|-----------|----------|----|-----|----|-----------|----------|
| 88.0393   | 44.5233  | 1  | S   | 17 |           |          |
| 189.0870  | 95.0471  | 2  | T   | 16 | 1836.9829 | 918.9951 |
| 290.1347  | 145.5710 | 3  | T   | 15 | 1735.9352 | 868.4713 |
| 391.1823  | 196.0948 | 4  | T   | 14 | 1634.8876 | 817.9474 |
| 448.2038  | 224.6055 | 5  | G   | 13 | 1533.8399 | 767.4236 |
| 585.2627  | 293.1350 | 6  | H   | 12 | 1476.8184 | 738.9129 |
| 698.3468  | 349.6770 | 7  | L   | 11 | 1339.7595 | 670.3834 |
| 811.4308  | 406.2191 | 8  | I   | 10 | 1226.6754 | 613.8414 |
| 974.4942  | 487.7507 | 9  | Y   | 9  | 1113.5914 | 557.2993 |
| 1119.6237 | 560.3155 | 10 | K   | 8  | 950.5281  | 475.7677 |
| 1279.6544 | 640.3308 | 11 | C   | 7  | 805.3985  | 403.2029 |
| 1336.6758 | 668.8416 | 12 | G   | 6  | 645.3678  | 323.1876 |
| 1393.6973 | 697.3523 | 13 | G   | 5  | 588.3464  | 294.6768 |
| 1506.7814 | 753.8943 | 14 | I   | 4  | 531.3249  | 266.1661 |
| 1621.8083 | 811.4078 | 15 | D   | 3  | 418.2409  | 209.6241 |
| 1749.9033 | 875.4553 | 16 | K   | 2  | 303.2139  | 152.1106 |
|           |          | 17 | R   | 1  | 175.1190  | 88.0631  |

[\[Click\]](#) to move table

Static Modifications:  
 C: 57.02146  
 M: 3.0189  
 Variable Modifications:  
 K: 17.0346



# eEF1A

## K.STTTGHLIYmonoKCGGIDKR.T [20, 36] (missed 2)

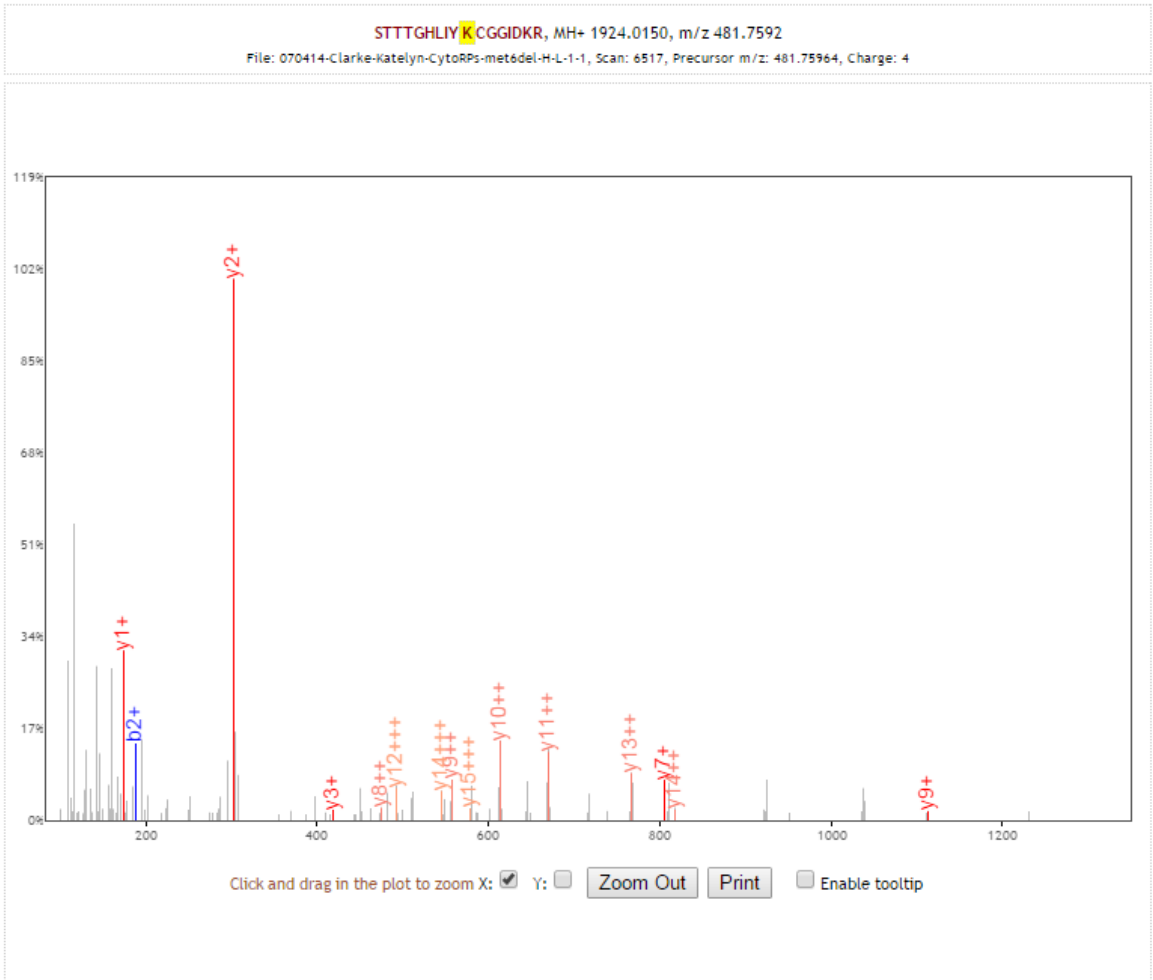

| b+              | b2+      | b3+      | #  | Seq #      | y+               | y2+             | y3+             |
|-----------------|----------|----------|----|------------|------------------|-----------------|-----------------|
| 88.0393         | 44.5233  | 30.0180  | 1  | S 17       |                  |                 |                 |
| <b>189.0870</b> | 95.0471  | 63.7005  | 2  | T 16       | 1836.9829        | 918.9951        | 612.9992        |
| 290.1347        | 145.5710 | 97.3831  | 3  | T 15       | 1735.9352        | 868.4713        | <b>579.3166</b> |
| 391.1823        | 196.0948 | 131.0656 | 4  | T 14       | 1634.8876        | <b>817.9474</b> | <b>545.6340</b> |
| 448.2038        | 224.6055 | 150.0728 | 5  | G 13       | 1533.8399        | <b>767.4236</b> | 511.9515        |
| 585.2627        | 293.1350 | 195.7591 | 6  | H 12       | 1476.8184        | 738.9129        | <b>492.9443</b> |
| 698.3468        | 349.6770 | 233.4538 | 7  | L 11       | 1339.7595        | <b>670.3834</b> | 447.2580        |
| 811.4308        | 406.2191 | 271.1485 | 8  | I 10       | 1226.6754        | <b>613.8414</b> | 409.5633        |
| 974.4942        | 487.7507 | 325.5029 | 9  | Y 9        | <b>1113.5914</b> | <b>557.2993</b> | 371.8686        |
| 1119.6237       | 560.3155 | 373.8794 | 10 | <b>K</b> 8 | 950.5281         | <b>475.7677</b> | 317.5142        |
| 1279.6544       | 640.3308 | 427.2230 | 11 | C 7        | <b>805.3985</b>  | 403.2029        | 269.1377        |
| 1336.6758       | 668.8416 | 446.2301 | 12 | G 6        | 645.3678         | 323.1876        | 215.7941        |
| 1393.6973       | 697.3523 | 465.2373 | 13 | G 5        | 588.3464         | 294.6768        | 196.7870        |
| 1506.7814       | 753.8943 | 502.9320 | 14 | I 4        | 531.3249         | 266.1661        | 177.7798        |
| 1621.8083       | 811.4078 | 541.2743 | 15 | D 3        | <b>418.2409</b>  | 209.6241        | 140.0851        |
| 1749.9033       | 875.4553 | 583.9726 | 16 | K 2        | <b>303.2139</b>  | 152.1106        | 101.7428        |
|                 |          |          | 17 | R 1        | <b>175.1190</b>  | 88.0631         | 59.0445         |

[\[click\]](#) to move table

Static Modifications:  
C: 57.02146  
M: 3.0189

Variable Modifications:  
K: 17.0346

# eEF1A

K.STTTGHLIYmono**K**CGGIDKR.T [20, 36] (missed 2)

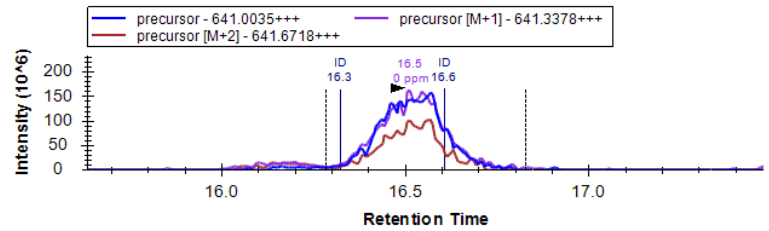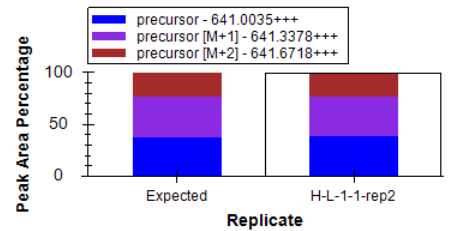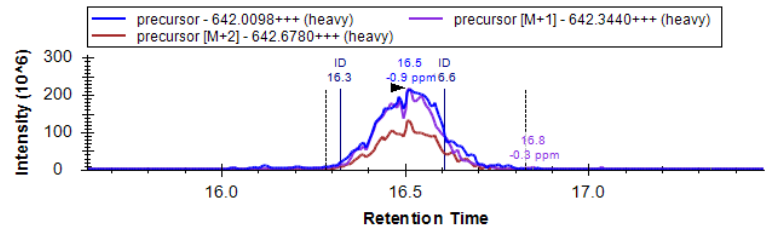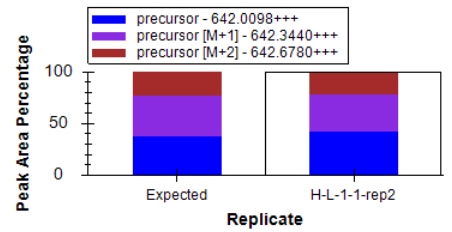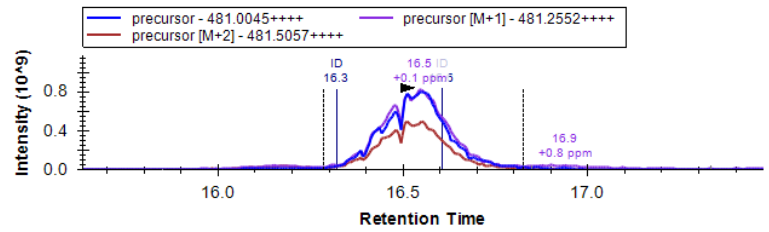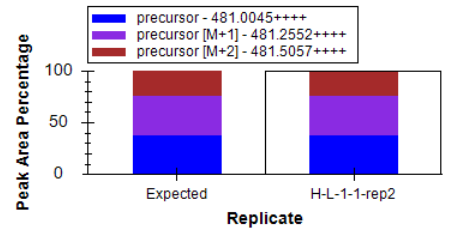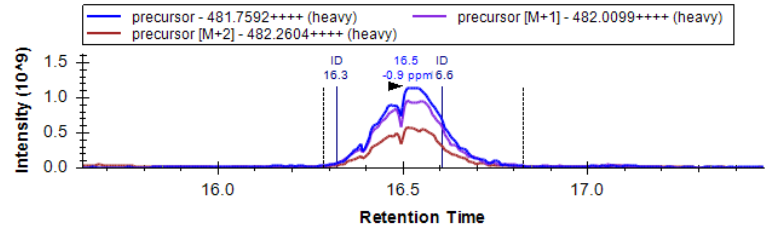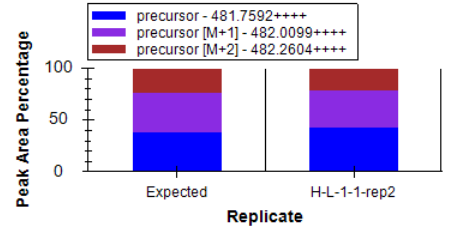

Replicate 2

# eEF1A

## K.STTTGHLIYmonoKCGGIDKR.T [20, 36] (missed 2)

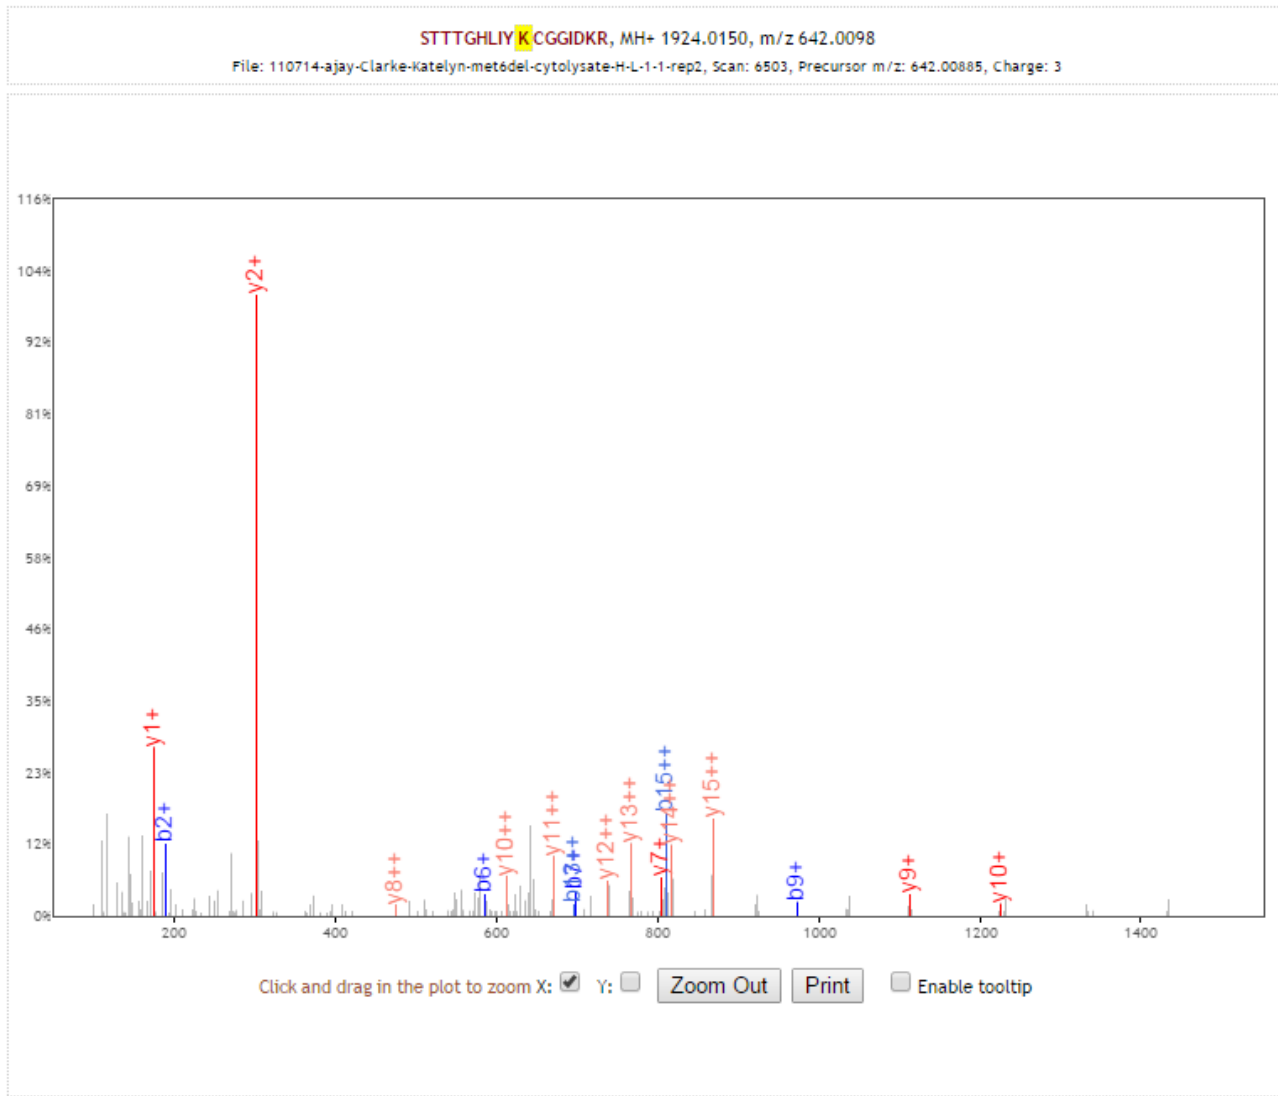

| b+              | b2+             | #  | Seq #      | y+               | y2+             |
|-----------------|-----------------|----|------------|------------------|-----------------|
| 88.0393         | 44.5233         | 1  | S 17       |                  |                 |
| <b>189.0870</b> | 95.0471         | 2  | T 16       | 1836.9829        | 918.9951        |
| 290.1347        | 145.5710        | 3  | T 15       | 1735.9352        | <b>868.4713</b> |
| 391.1823        | 196.0948        | 4  | T 14       | 1634.8876        | <b>817.9474</b> |
| 448.2038        | 224.6055        | 5  | G 13       | 1533.8399        | <b>767.4236</b> |
| <b>585.2627</b> | 293.1350        | 6  | H 12       | 1476.8184        | <b>738.9129</b> |
| <b>698.3468</b> | 349.6770        | 7  | L 11       | 1339.7595        | <b>670.3834</b> |
| 811.4308        | 406.2191        | 8  | I 10       | <b>1226.6754</b> | <b>613.8414</b> |
| <b>974.4942</b> | 487.7507        | 9  | Y 9        | <b>1113.5914</b> | 557.2993        |
| 1119.6237       | 560.3155        | 10 | <b>K 8</b> | 950.5281         | <b>475.7677</b> |
| 1279.6544       | 640.3308        | 11 | C 7        | <b>805.3985</b>  | 403.2029        |
| 1336.6758       | 668.8416        | 12 | G 6        | 645.3678         | 323.1876        |
| 1393.6973       | <b>697.3523</b> | 13 | G 5        | 588.3464         | 294.6768        |
| 1506.7814       | 753.8943        | 14 | I 4        | 531.3249         | 266.1661        |
| 1621.8083       | <b>811.4078</b> | 15 | D 3        | 418.2409         | 209.6241        |
| 1749.9033       | 875.4553        | 16 | K 2        | <b>303.2139</b>  | 152.1106        |
|                 |                 | 17 | R 1        | <b>175.1190</b>  | 88.0631         |

[\[Click\]](#) to move table

Static Modifications:  
 C: 57.02146  
 M: 3.0189

Variable Modifications:  
 K: 17.0346

# eEF1A

## K.STTTGHLIYmono**K**CGGIDKR.T [20, 36] (missed 2)

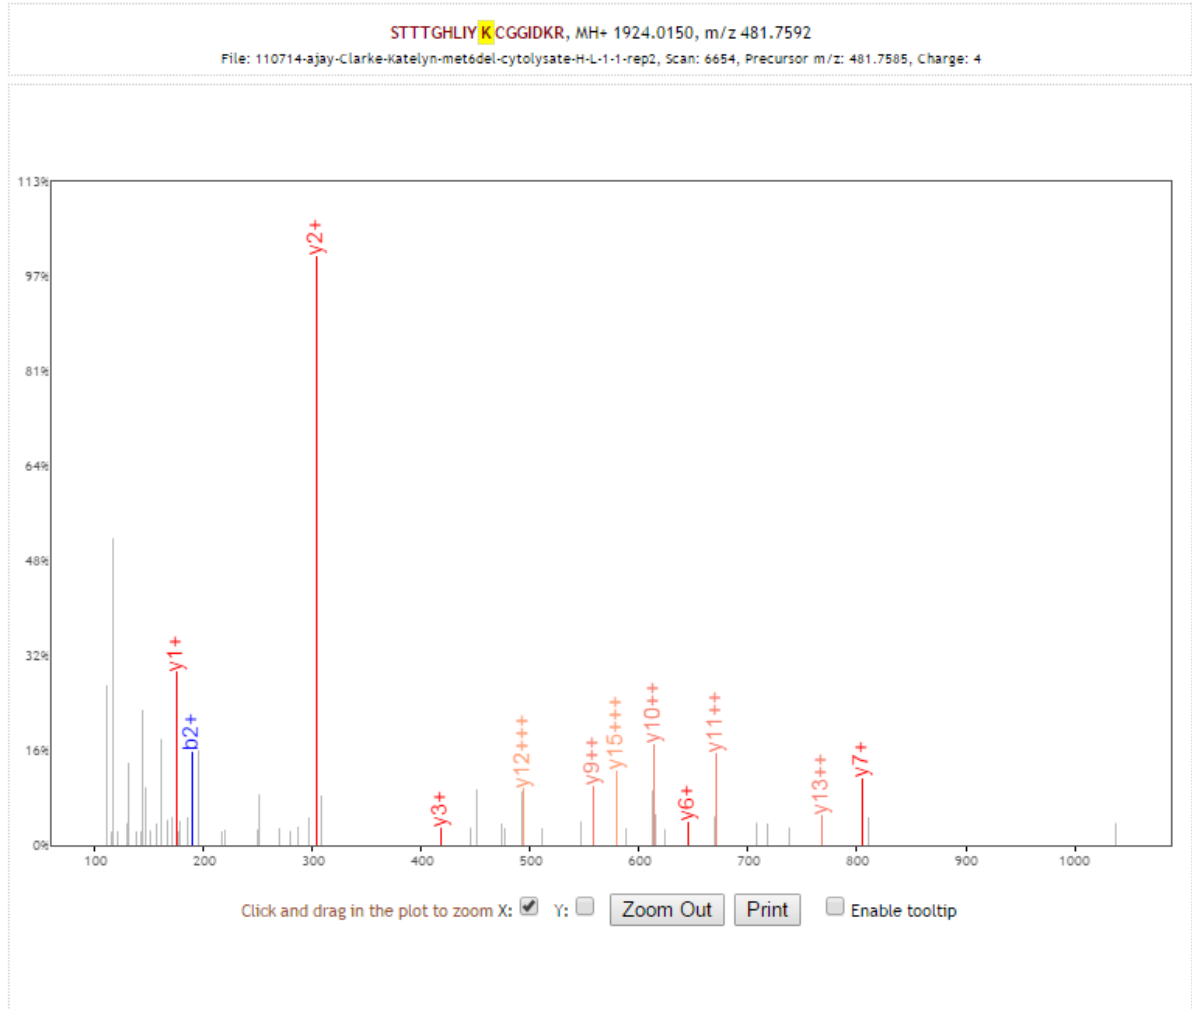

| b+              | b2+      | b3+      | #  | Seq #      | y+              | y2+             | y3+             |
|-----------------|----------|----------|----|------------|-----------------|-----------------|-----------------|
| 88.0393         | 44.5233  | 30.0180  | 1  | S 17       |                 |                 |                 |
| <b>189.0870</b> | 95.0471  | 63.7005  | 2  | T 16       | 1836.9829       | 918.9951        | 612.9992        |
| 290.1347        | 145.5710 | 97.3831  | 3  | T 15       | 1735.9352       | 868.4713        | <b>579.3166</b> |
| 391.1823        | 196.0948 | 131.0656 | 4  | T 14       | 1634.8876       | 817.9474        | 545.6340        |
| 448.2038        | 224.6055 | 150.0728 | 5  | G 13       | 1533.8399       | <b>767.4236</b> | 511.9515        |
| 585.2627        | 293.1350 | 195.7591 | 6  | H 12       | 1476.8184       | 738.9129        | <b>492.9443</b> |
| 698.3468        | 349.6770 | 233.4538 | 7  | L 11       | 1339.7595       | <b>670.3834</b> | 447.2580        |
| 811.4308        | 406.2191 | 271.1485 | 8  | I 10       | 1226.6754       | <b>613.8414</b> | 409.5633        |
| 974.4942        | 487.7507 | 325.5029 | 9  | Y 9        | 1113.5914       | <b>557.2993</b> | 371.8686        |
| 1119.6237       | 560.3155 | 373.8794 | 10 | <b>K</b> 8 | 950.5281        | 475.7677        | 317.5142        |
| 1279.6544       | 640.3308 | 427.2230 | 11 | C 7        | <b>805.3985</b> | 403.2029        | 269.1377        |
| 1336.6758       | 668.8416 | 446.2301 | 12 | G 6        | <b>645.3678</b> | 323.1876        | 215.7941        |
| 1393.6973       | 697.3523 | 465.2373 | 13 | G 5        | 588.3464        | 294.6768        | 196.7870        |
| 1506.7814       | 753.8943 | 502.9320 | 14 | I 4        | 531.3249        | 266.1661        | 177.7798        |
| 1621.8083       | 811.4078 | 541.2743 | 15 | D 3        | <b>418.2409</b> | 209.6241        | 140.0851        |
| 1749.9033       | 875.4553 | 583.9726 | 16 | K 2        | <b>303.2139</b> | 152.1106        | 101.7428        |
|                 |          |          | 17 | R 1        | <b>175.1190</b> | 88.0631         | 59.0445         |

[\[click\]](#) to move table

Static Modifications:  
 C: 57.02146  
 M: 3.0189

Variable Modifications:  
 K: 17.0346

# eEF1A

## K.STTTGHLIYmono**K**CGGIDKR.T [20, 36] (missed 2)

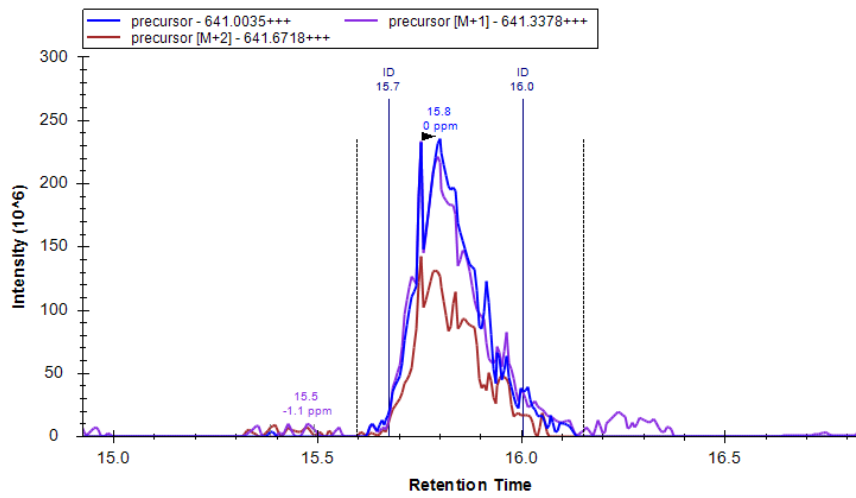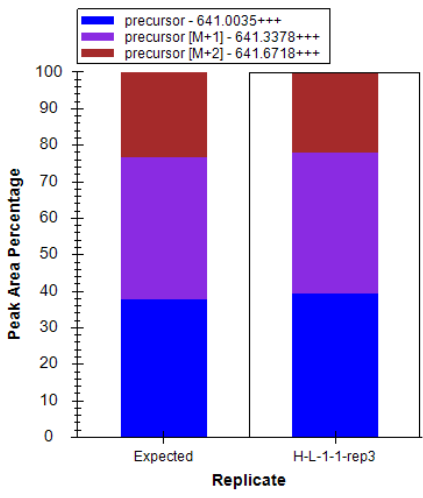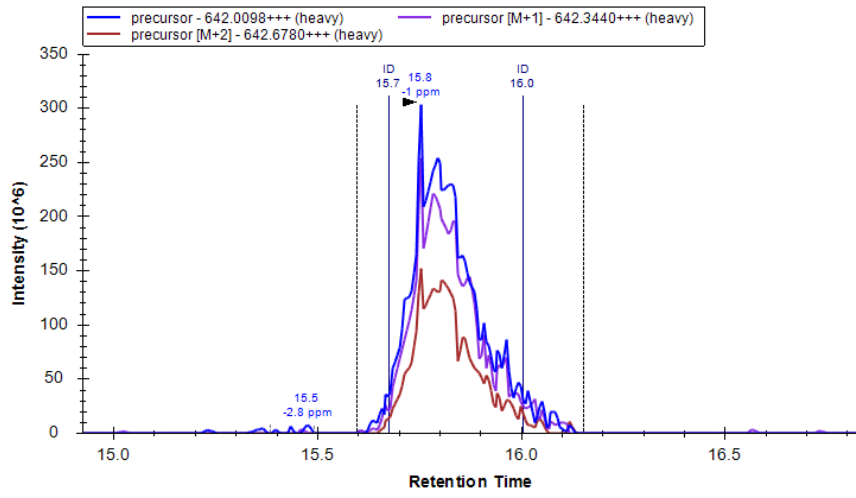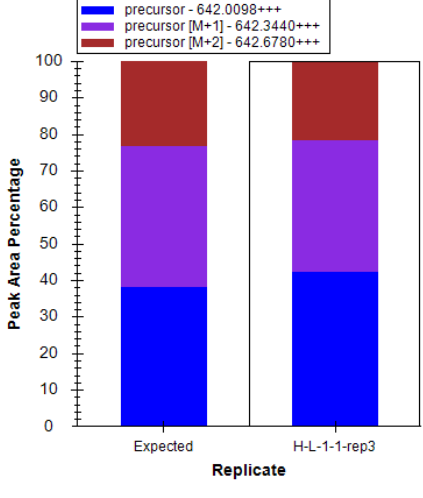

# eEF1A

## K.STTTGHLIYmonoKCGGIDKR.T [20, 36] (missed 2)

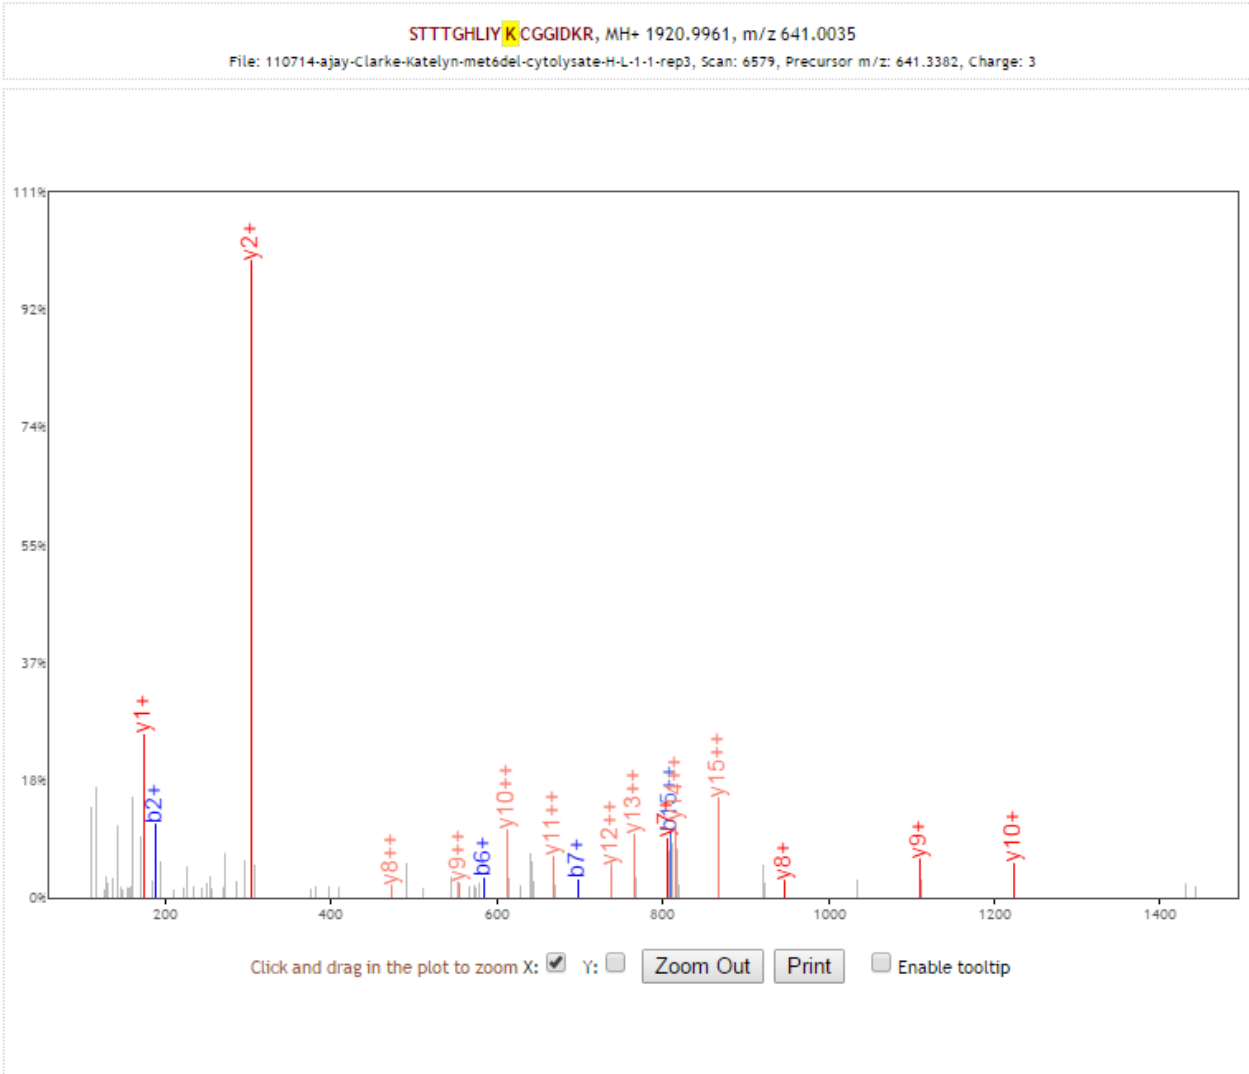

| b+              | b2+             | #  | Seq | #  | y+              | y2+      |
|-----------------|-----------------|----|-----|----|-----------------|----------|
| 88.0393         | 44.5233         | 1  | S   | 17 |                 |          |
| <b>189.0870</b> | 95.0471         | 2  | T   | 16 | 1833.9640       | 917.4857 |
| 290.1347        | 145.5710        | 3  | T   | 15 | 1732.9163       | 866.9618 |
| 391.1823        | 196.0948        | 4  | T   | 14 | 1631.8687       | 816.4380 |
| 448.2038        | 224.6055        | 5  | G   | 13 | 1530.8210       | 765.9141 |
| <b>585.2627</b> | 293.1350        | 6  | H   | 12 | 1473.7995       | 737.4034 |
| <b>698.3468</b> | 349.6770        | 7  | L   | 11 | 1336.7406       | 668.8739 |
| 811.4308        | 406.2191        | 8  | I   | 10 | 1223.6565       | 612.3319 |
| 974.4942        | 487.7507        | 9  | Y   | 9  | 1110.5725       | 555.7899 |
| 1116.6048       | 558.8061        | 10 | K   | 8  | 947.5092        | 474.2582 |
| 1276.6355       | 638.8214        | 11 | C   | 7  | 805.3985        | 403.2029 |
| 1333.6569       | 667.3321        | 12 | G   | 6  | 645.3678        | 323.1876 |
| 1390.6784       | 695.8428        | 13 | G   | 5  | 588.3464        | 294.6768 |
| 1503.7625       | 752.3849        | 14 | I   | 4  | 531.3249        | 266.1661 |
| 1618.7894       | <b>809.8983</b> | 15 | D   | 3  | 418.2409        | 209.6241 |
| 1746.8844       | 873.9458        | 16 | K   | 2  | 303.2139        | 152.1106 |
|                 |                 | 17 | R   | 1  | <b>175.1190</b> | 88.0631  |

[\[click\]](#) to move table  
 Static Modifications:  
 C: 57.02146  
 Variable Modifications:  
 K: 14.0157

# eEF1A

## K.STTTGHLIYmono**K**CGGIDKR.T [20, 36] (missed 2)

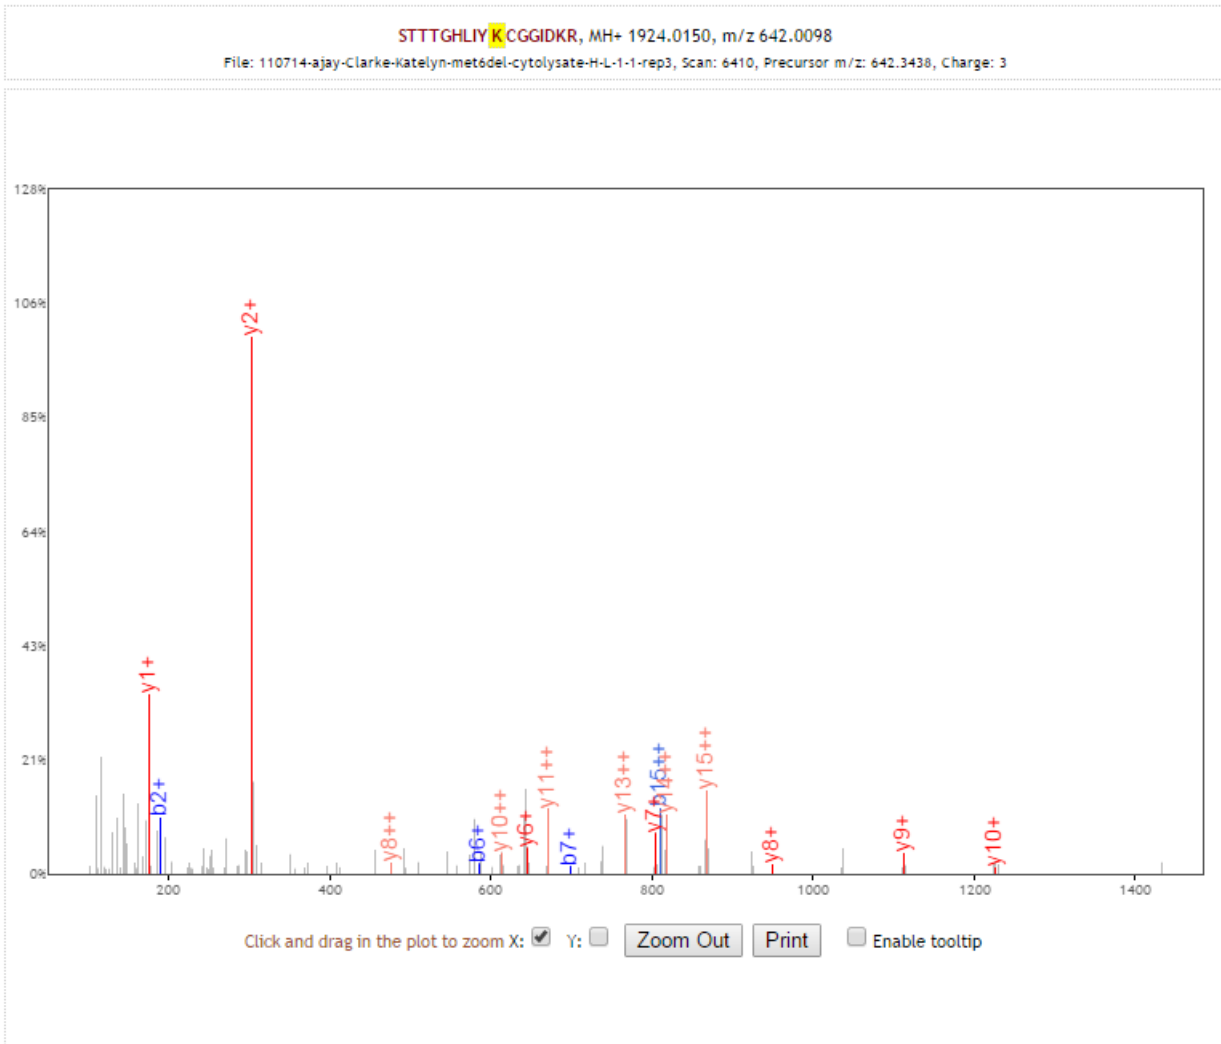

| b+              | b2+             | #  | Seq      | #  | y+               | y2+             |
|-----------------|-----------------|----|----------|----|------------------|-----------------|
| 88.0393         | 44.5233         | 1  | S        | 17 |                  |                 |
| <b>189.0870</b> | 95.0471         | 2  | T        | 16 | 1836.9829        | 918.9951        |
| 290.1347        | 145.5710        | 3  | T        | 15 | 1735.9352        | <b>868.4713</b> |
| 391.1823        | 196.0948        | 4  | T        | 14 | 1634.8876        | <b>817.9474</b> |
| 448.2038        | 224.6055        | 5  | G        | 13 | 1533.8399        | <b>767.4236</b> |
| <b>585.2627</b> | 293.1350        | 6  | H        | 12 | 1476.8184        | 738.9129        |
| <b>698.3468</b> | 349.6770        | 7  | L        | 11 | 1339.7595        | <b>670.3834</b> |
| 811.4308        | 406.2191        | 8  | I        | 10 | <b>1226.6754</b> | <b>613.8414</b> |
| 974.4942        | 487.7507        | 9  | Y        | 9  | <b>1113.5914</b> | 557.2993        |
| 1119.6237       | 560.3155        | 10 | <b>K</b> | 8  | <b>950.5281</b>  | <b>475.7677</b> |
| 1279.6544       | 640.3308        | 11 | C        | 7  | <b>805.3985</b>  | 403.2029        |
| 1336.6758       | 668.8416        | 12 | G        | 6  | <b>645.3678</b>  | 323.1876        |
| 1393.6973       | 697.3523        | 13 | G        | 5  | 588.3464         | 294.6768        |
| 1506.7814       | 753.8943        | 14 | I        | 4  | 531.3249         | 266.1661        |
| 1621.8083       | <b>811.4078</b> | 15 | D        | 3  | 418.2409         | 209.6241        |
| 1749.9033       | 875.4553        | 16 | K        | 2  | <b>303.2139</b>  | 152.1106        |
|                 |                 | 17 | R        | 1  | <b>175.1190</b>  | 88.0631         |

[\[Click\]](#) to move table

Static Modifications:  
 C: 57.02146  
 M: 3.0189

Variable Modifications:  
 K: 17.0346

# eEF1A

## R.ERGITIDIALWtri**K**FETPK.Y [67, 83] (missed 2)

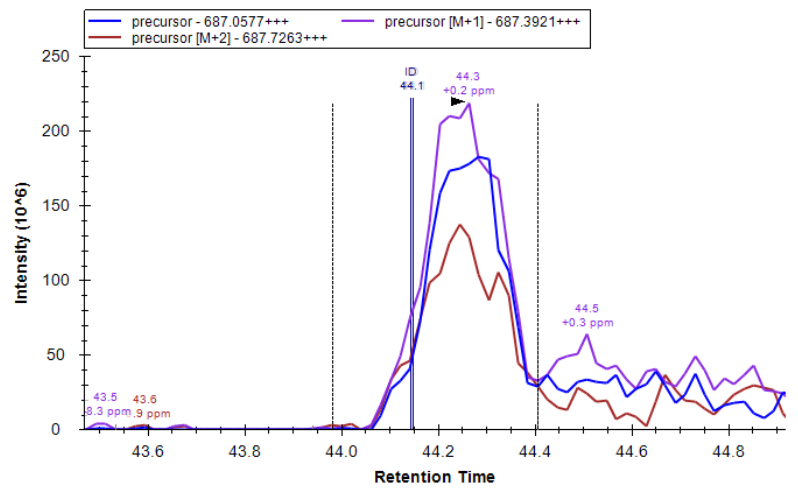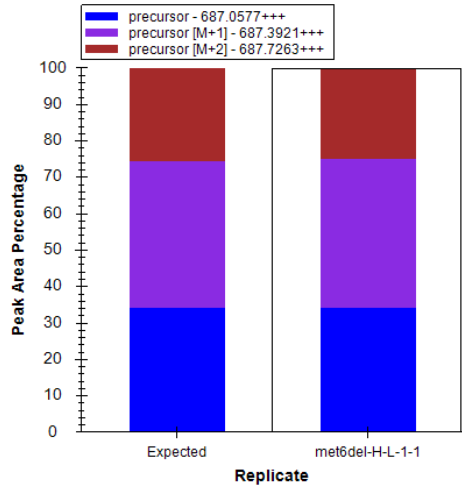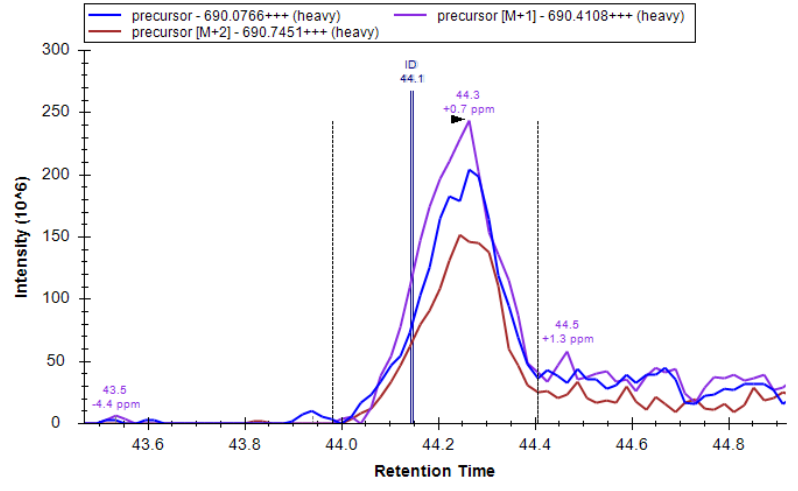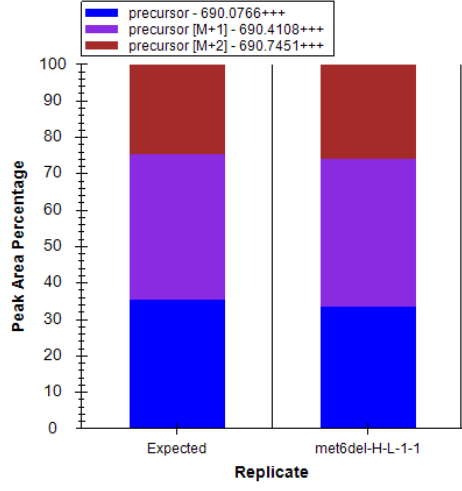



# eEF1A

## R.ERGITIDIALWtri**K**FETPK.Y [67, 83] (missed 2)

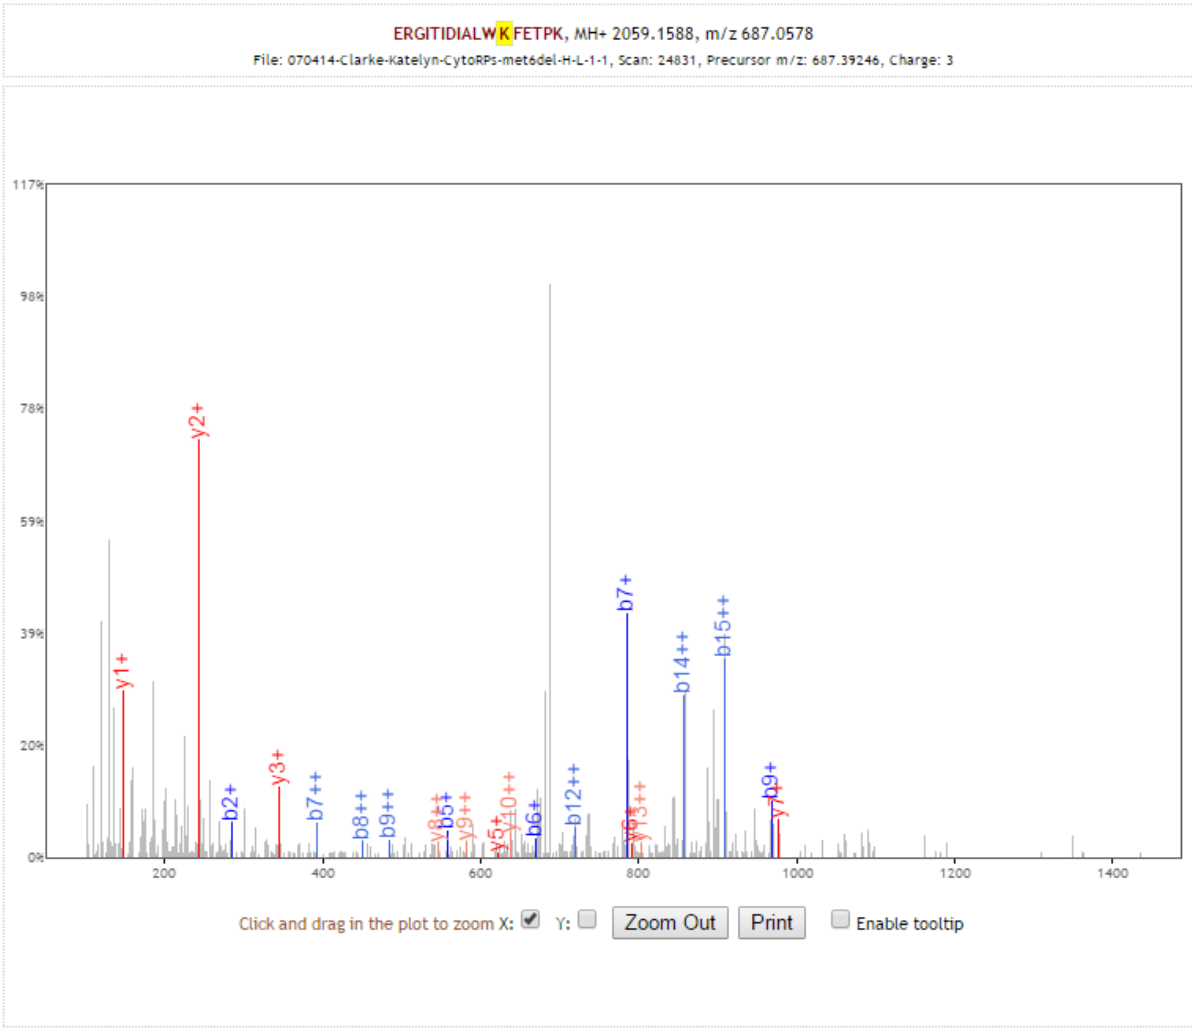

| b+              | b2+      | #  | Seq #      | y+              | y2+             |
|-----------------|----------|----|------------|-----------------|-----------------|
| 130.0499        | 65.5286  | 1  | E 17       |                 |                 |
| <b>286.1510</b> | 143.5791 | 2  | R 16       | 1930.1162       | 965.5617        |
| 343.1724        | 172.0899 | 3  | G 15       | 1774.0151       | 887.5112        |
| 456.2565        | 228.6319 | 4  | I 14       | 1716.9936       | 859.0004        |
| <b>557.3042</b> | 279.1557 | 5  | T 13       | 1603.9096       | <b>802.4584</b> |
| <b>670.3883</b> | 335.6978 | 6  | I 12       | 1502.8619       | 751.9346        |
| <b>785.4152</b> | 393.2112 | 7  | D 11       | 1389.7778       | 695.3925        |
| 898.4993        | 449.7533 | 8  | I 10       | 1274.7509       | <b>637.8791</b> |
| <b>969.5364</b> | 485.2718 | 9  | A 9        | 1161.6668       | <b>581.3370</b> |
| 1082.6204       | 541.8139 | 10 | L 8        | 1090.6297       | <b>545.8185</b> |
| 1268.6997       | 634.8535 | 11 | W 7        | <b>977.5456</b> | 489.2765        |
| 1438.8418       | 719.9245 | 12 | <b>K</b> 6 | <b>791.4663</b> | 396.2368        |
| 1585.9102       | 793.4588 | 13 | F 5        | <b>621.3243</b> | 311.1658        |
| 1714.9528       | 857.9800 | 14 | E 4        | 474.2558        | 237.6316        |
| 1816.0005       | 908.5039 | 15 | T 3        | <b>345.2132</b> | 173.1103        |
| 1913.0533       | 957.0303 | 16 | P 2        | <b>244.1656</b> | 122.5864        |
|                 |          | 17 | K 1        | <b>147.1128</b> | 74.0600         |

[\[Click\]](#) to move table  
 Static Modifications:  
 C: 57.02146  
 Variable Modifications:  
 K: 42.0471



# eEF1A

## R.ERGITIDIALWtriKFETPK.Y [67, 83] (missed 2)

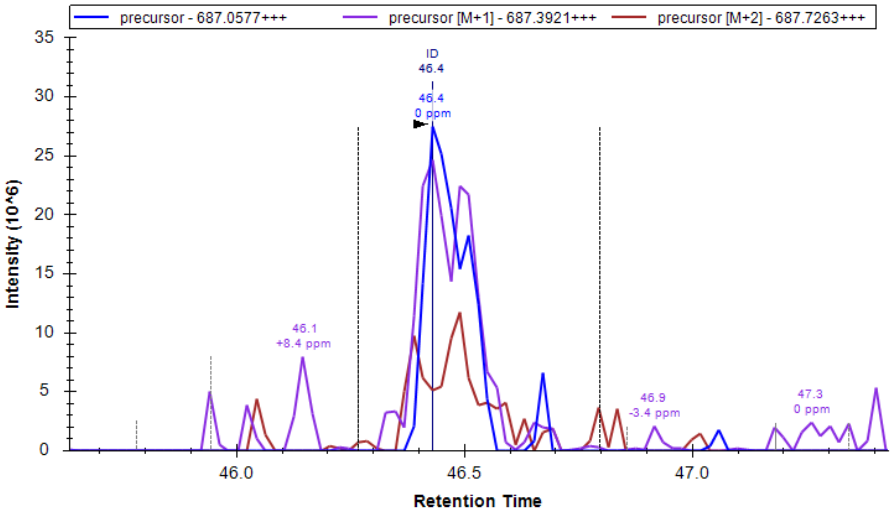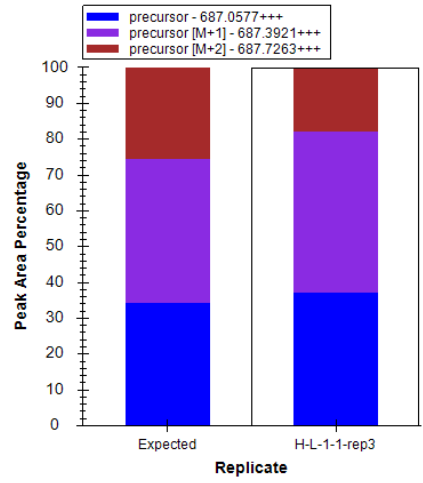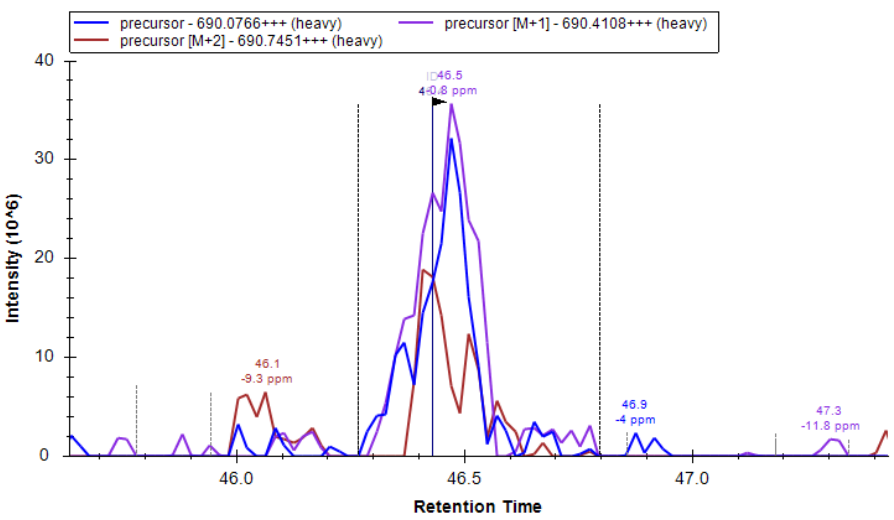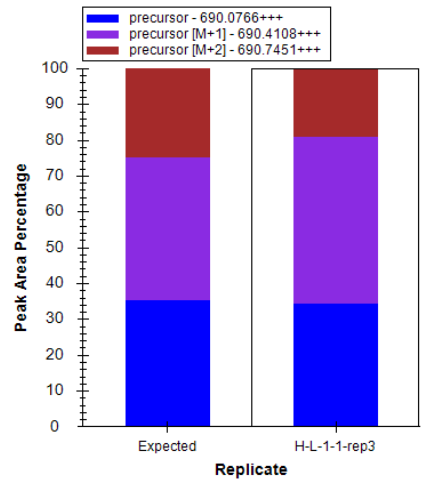

Replicate 3

# eEF1A

## R.ERGITIDIALWtri**K**FETPK.Y [67, 83] (missed 2)

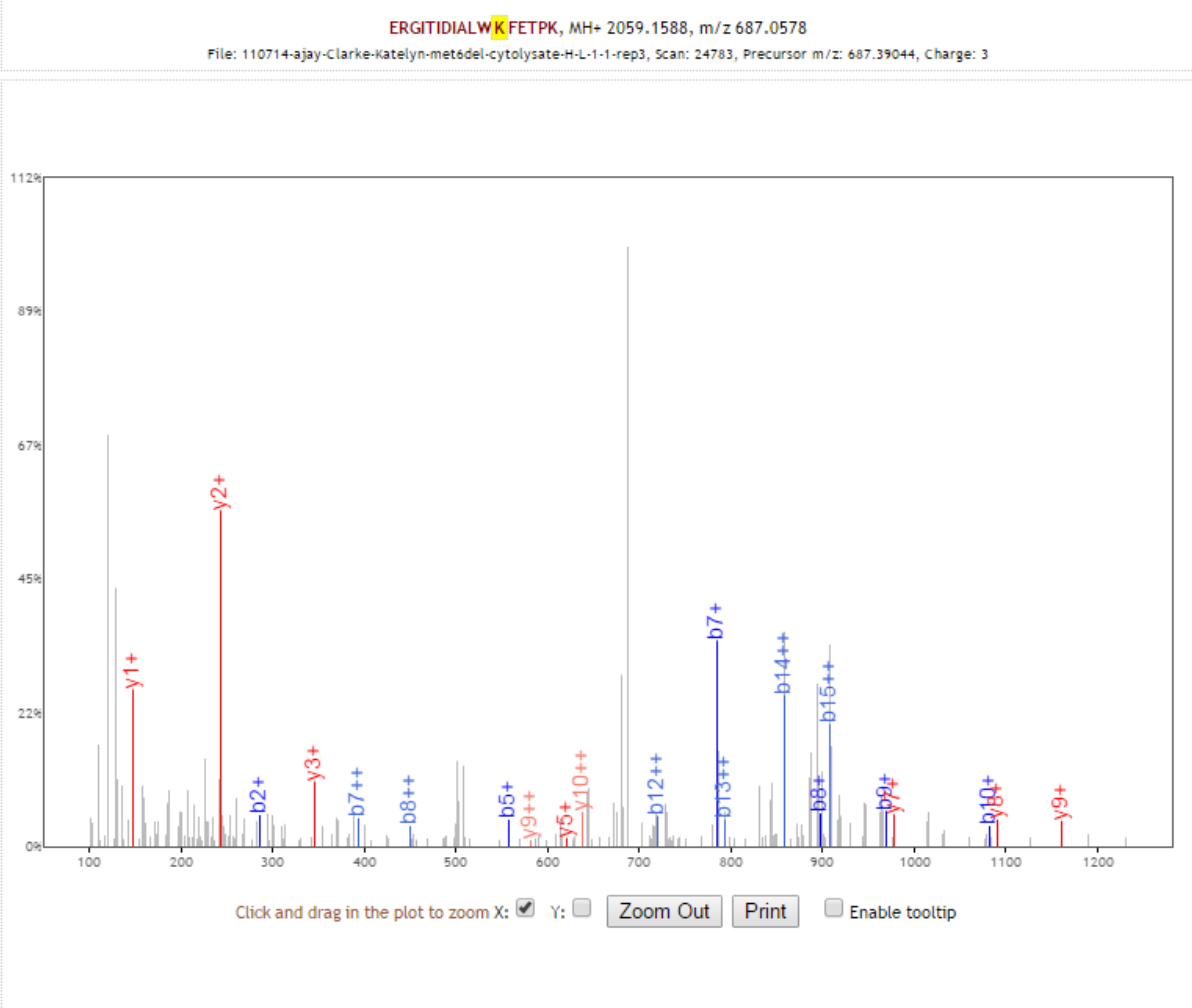

| b+               | b2+             | #  | Seq #      | y+               | y2+             |
|------------------|-----------------|----|------------|------------------|-----------------|
| 130.0499         | 65.5286         | 1  | E 17       |                  |                 |
| <b>286.1510</b>  | 143.5791        | 2  | R 16       | 1930.1162        | 965.5617        |
| 343.1724         | 172.0899        | 3  | G 15       | 1774.0151        | 887.5112        |
| 456.2565         | 228.6319        | 4  | I 14       | 1716.9936        | 859.0004        |
| <b>557.3042</b>  | 279.1557        | 5  | T 13       | 1603.9096        | 802.4584        |
| 670.3883         | 335.6978        | 6  | I 12       | 1502.8619        | 751.9346        |
| <b>785.4152</b>  | <b>393.2112</b> | 7  | D 11       | 1389.7778        | 695.3925        |
| 898.4993         | 449.7533        | 8  | I 10       | 1274.7509        | <b>637.8791</b> |
| <b>969.5364</b>  | 485.2718        | 9  | A 9        | <b>1161.6668</b> | <b>581.3370</b> |
| <b>1082.6204</b> | 541.8139        | 10 | L 8        | <b>1090.6297</b> | 545.8185        |
| 1268.6997        | 634.8535        | 11 | W 7        | <b>977.5456</b>  | 489.2765        |
| 1438.8418        | <b>719.9245</b> | 12 | <b>K</b> 6 | 791.4663         | 396.2368        |
| 1585.9102        | <b>793.4588</b> | 13 | F 5        | <b>621.3243</b>  | 311.1658        |
| 1714.9528        | <b>857.9800</b> | 14 | E 4        | 474.2558         | 237.6316        |
| 1816.0005        | <b>908.5039</b> | 15 | T 3        | <b>345.2132</b>  | 173.1103        |
| 1913.0533        | 957.0303        | 16 | P 2        | <b>244.1656</b>  | 122.5864        |
|                  |                 | 17 | K 1        | <b>147.1128</b>  | 74.0600         |

[Click] to move table

Static Modifications:  
C: 57.02146

Variable Modifications:  
K: 42.0471

# eEF1A

## R.GITIDIALWtriKFETPK.Y [69, 83] (missed 1)

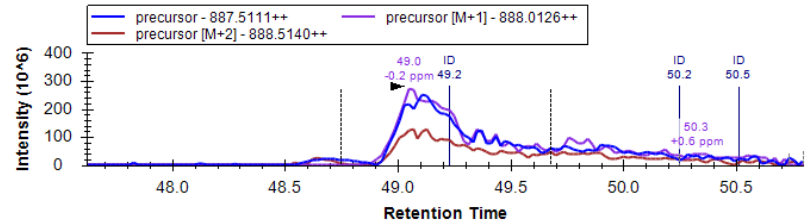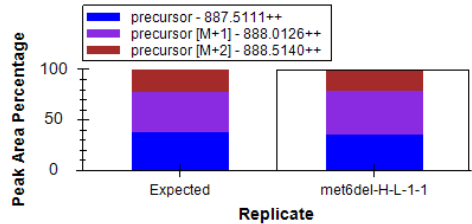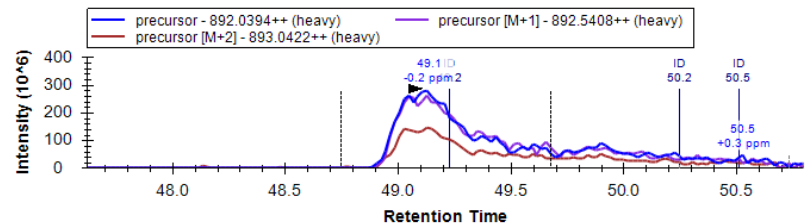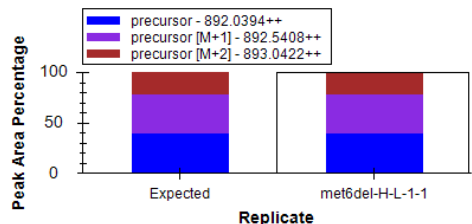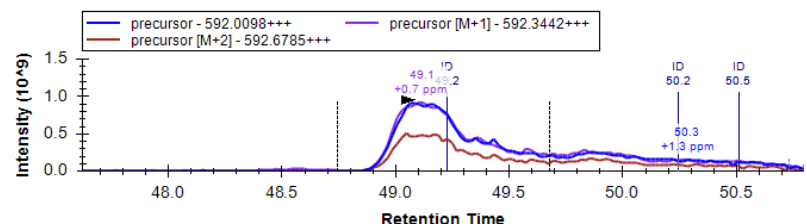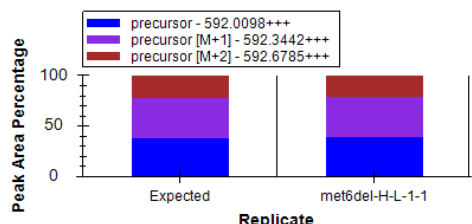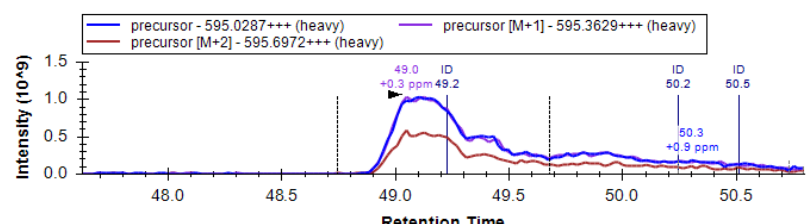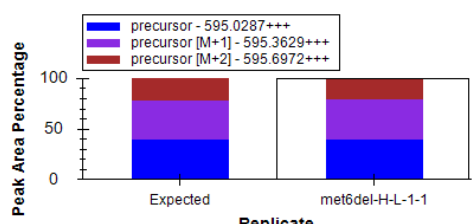

# eEF1A

## R.GITIDIALWtri**K**FETPK.Y [69, 83] (missed 1)

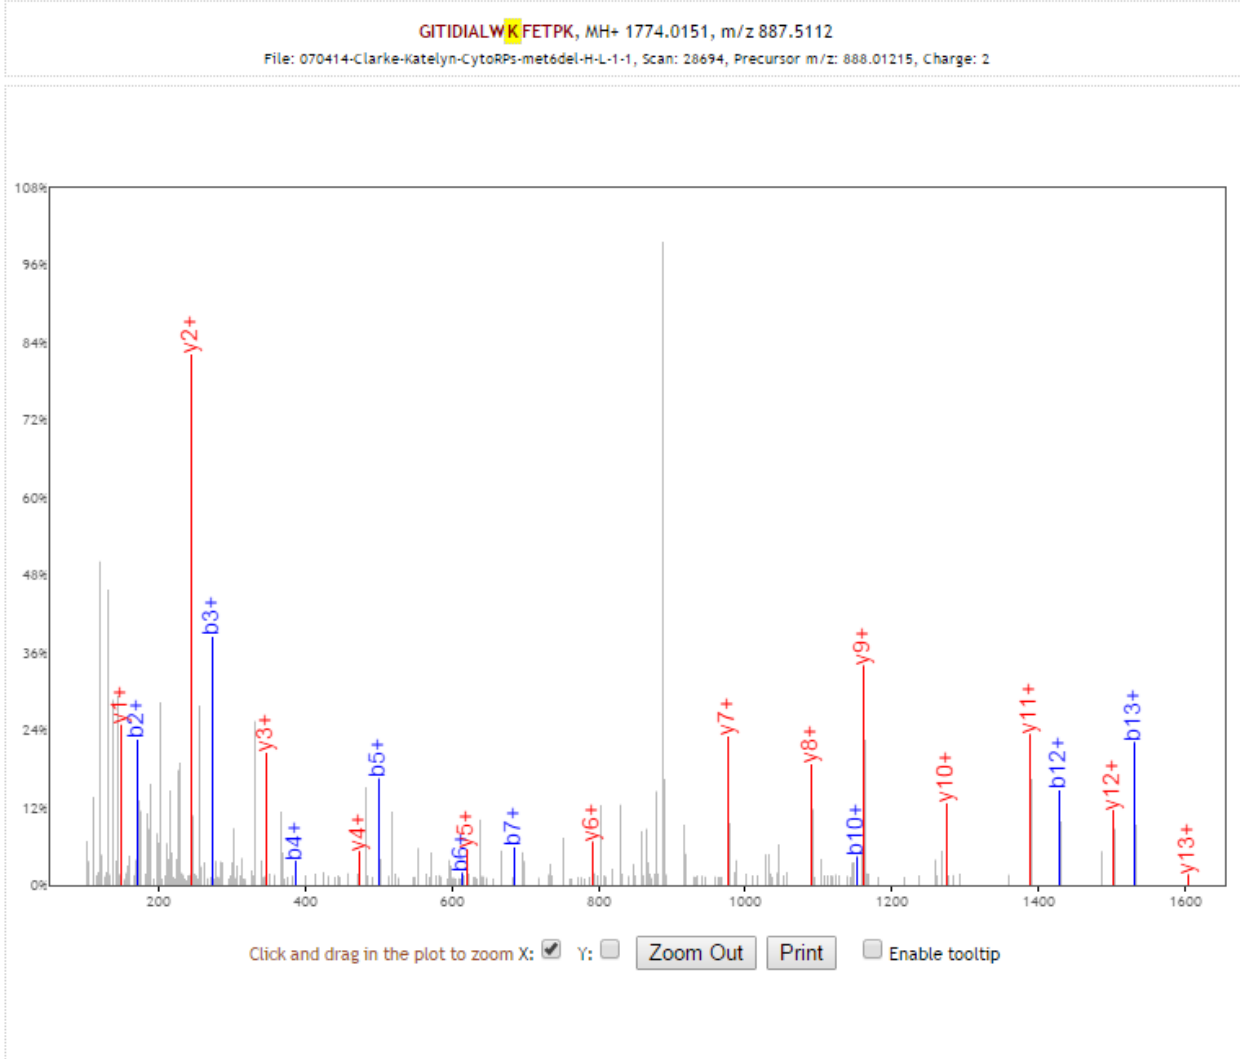

| b+        | #  | Seq # | y+        |
|-----------|----|-------|-----------|
| 58.0287   | 1  | G 15  |           |
| 171.1128  | 2  | I 14  | 1716.9936 |
| 272.1605  | 3  | T 13  | 1603.9096 |
| 385.2445  | 4  | I 12  | 1502.8619 |
| 500.2715  | 5  | D 11  | 1389.7778 |
| 613.3556  | 6  | I 10  | 1274.7509 |
| 684.3927  | 7  | A 9   | 1161.6668 |
| 797.4767  | 8  | L 8   | 1090.6297 |
| 983.5560  | 9  | W 7   | 977.5456  |
| 1153.6981 | 10 | K 6   | 791.4663  |
| 1300.7665 | 11 | F 5   | 621.3243  |
| 1429.8091 | 12 | E 4   | 474.2558  |
| 1530.8568 | 13 | T 3   | 345.2132  |
| 1627.9096 | 14 | P 2   | 244.1656  |
|           | 15 | K 1   | 147.1128  |

[\[click\]](#) to move table

Static Modifications:  
C: 57.02146

Variable Modifications:  
K: 42.0471

# eEF1A

## R.GITIDIALWtr**K**FETPK.Y [69, 83] (missed 1)

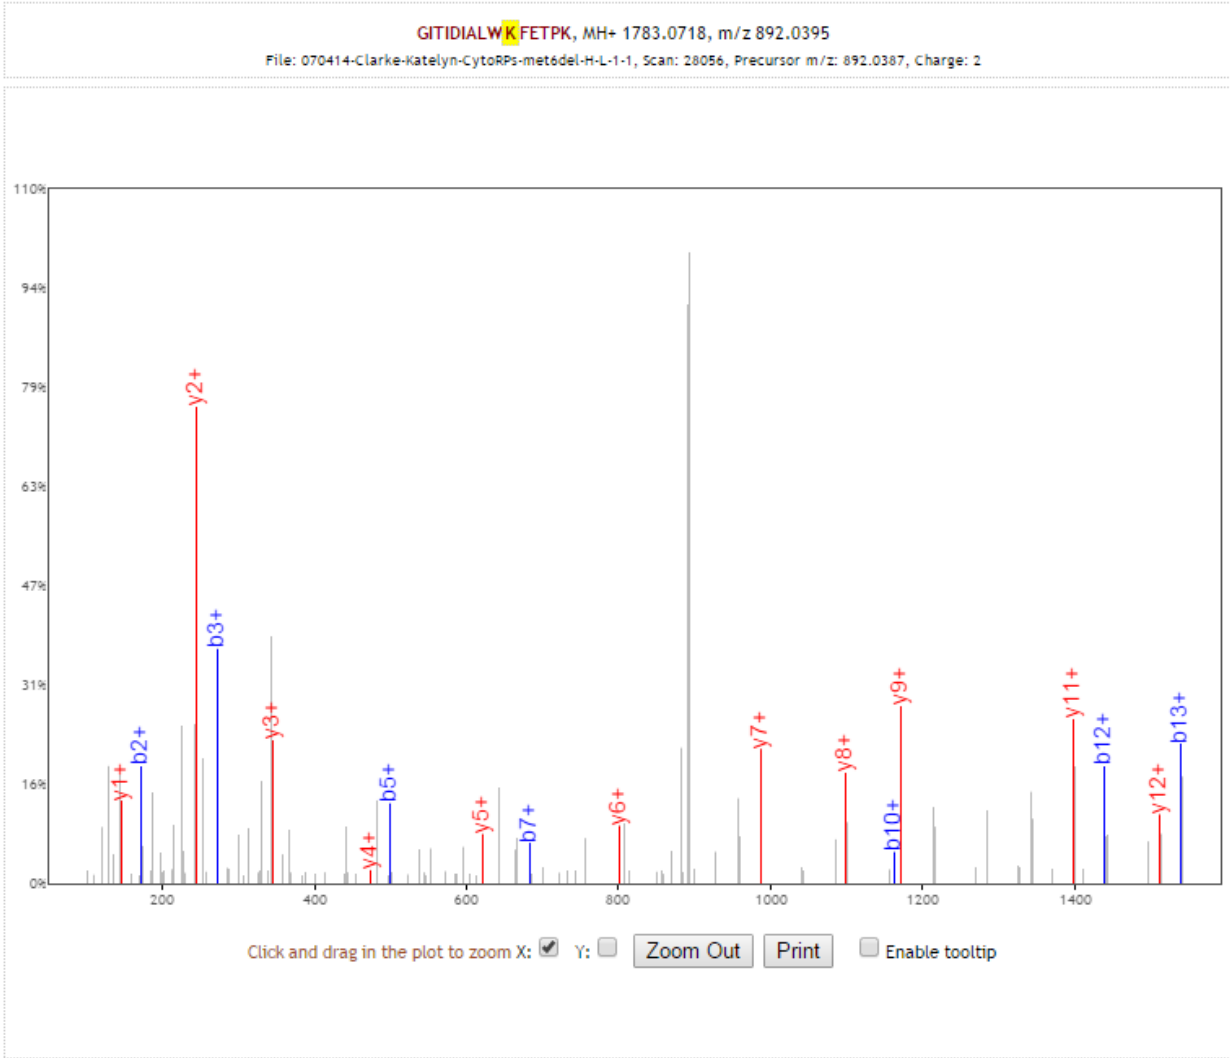

| b+        | #  | Seq # | y+        |
|-----------|----|-------|-----------|
| 58.0287   | 1  | G 15  |           |
| 171.1128  | 2  | I 14  | 1726.0503 |
| 272.1605  | 3  | T 13  | 1612.9663 |
| 385.2445  | 4  | I 12  | 1511.9186 |
| 500.2715  | 5  | D 11  | 1398.8345 |
| 613.3556  | 6  | I 10  | 1283.8076 |
| 684.3927  | 7  | A 9   | 1170.7235 |
| 797.4767  | 8  | L 8   | 1099.6864 |
| 983.5560  | 9  | W 7   | 986.6023  |
| 1162.7548 | 10 | K 6   | 800.5230  |
| 1309.8232 | 11 | F 5   | 621.3243  |
| 1438.8658 | 12 | E 4   | 474.2558  |
| 1539.9135 | 13 | T 3   | 345.2132  |
| 1636.9663 | 14 | P 2   | 244.1656  |
|           | 15 | K 1   | 147.1128  |

[\[Click\]](#) to move table

Static Modifications:  
 C: 57.02146  
 M: 3.0189

Variable Modifications:  
 K: 51.1038

# eEF1A

## R.GITIDIALWtri**K**FETPK.Y [69, 83] (missed 1)

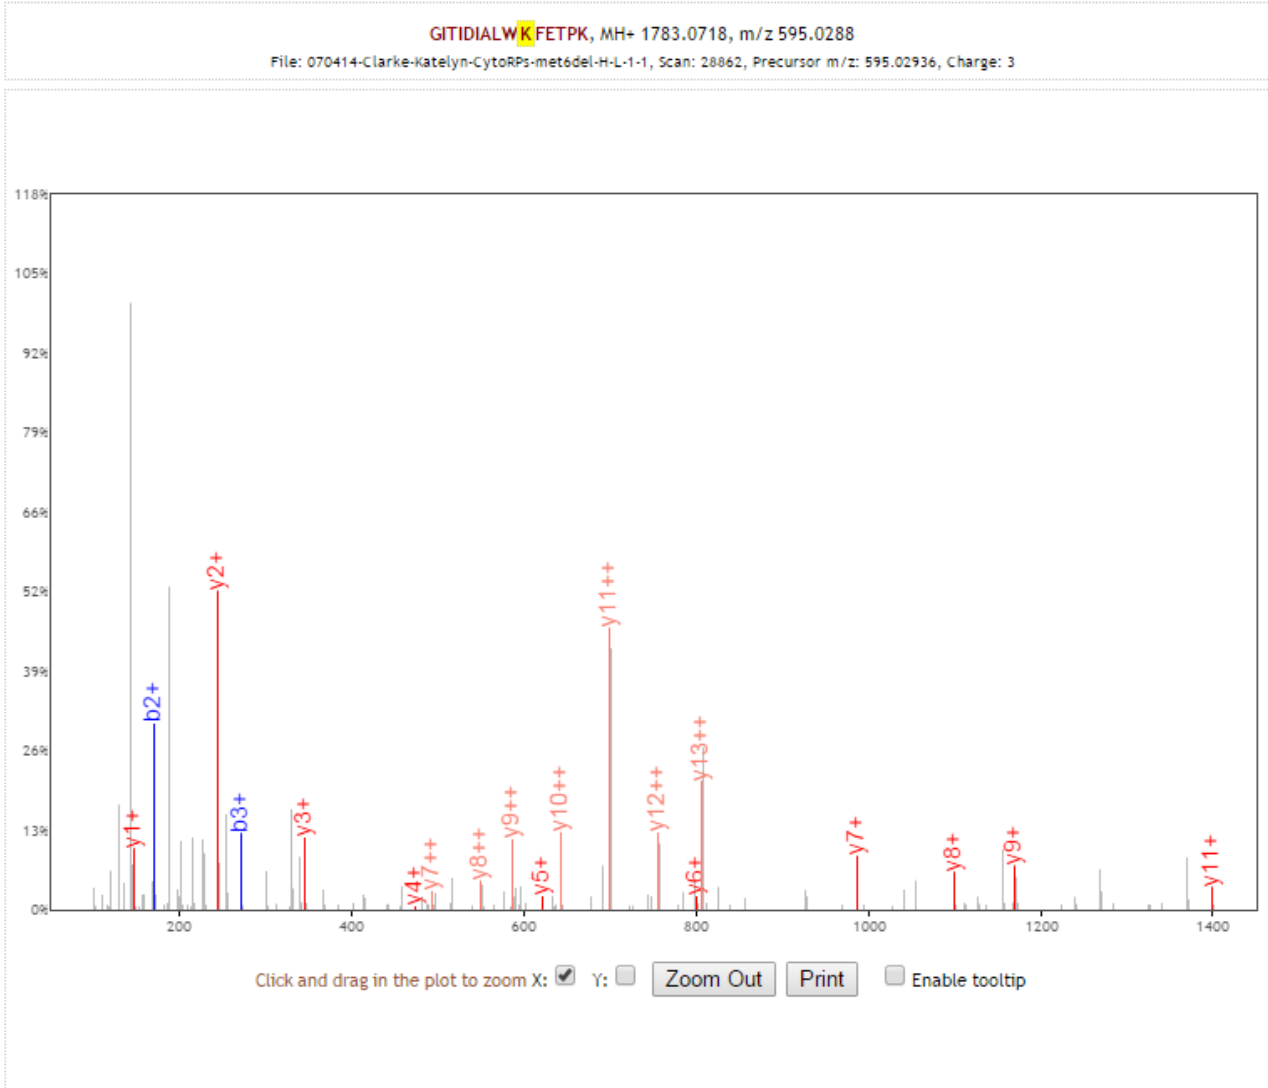

| b+              | b2+      | #  | Seq # | y+               | y2+             |
|-----------------|----------|----|-------|------------------|-----------------|
| 58.0287         | 29.5180  | 1  | G 15  |                  |                 |
| <b>171.1128</b> | 86.0600  | 2  | I 14  | 1726.0503        | 863.5288        |
| <b>272.1605</b> | 136.5839 | 3  | T 13  | 1612.9663        | <b>806.9868</b> |
| 385.2445        | 193.1259 | 4  | I 12  | 1511.9186        | <b>756.4629</b> |
| 500.2715        | 250.6394 | 5  | D 11  | <b>1398.8345</b> | <b>699.9209</b> |
| 613.3556        | 307.1814 | 6  | I 10  | 1283.8076        | <b>642.4074</b> |
| 684.3927        | 342.7000 | 7  | A 9   | <b>1170.7235</b> | <b>585.8654</b> |
| 797.4767        | 399.2420 | 8  | L 8   | <b>1099.6864</b> | <b>550.3468</b> |
| 983.5560        | 492.2817 | 9  | W 7   | <b>986.6023</b>  | <b>493.8048</b> |
| 1162.7548       | 581.8810 | 10 | K 6   | <b>800.5230</b>  | <b>400.7651</b> |
| 1309.8232       | 655.4152 | 11 | F 5   | <b>621.3243</b>  | <b>311.1658</b> |
| 1438.8658       | 719.9365 | 12 | E 4   | <b>474.2558</b>  | <b>237.6316</b> |
| 1539.9135       | 770.4604 | 13 | T 3   | <b>345.2132</b>  | <b>173.1103</b> |
| 1636.9663       | 818.9868 | 14 | P 2   | <b>244.1656</b>  | <b>122.5864</b> |
|                 |          | 15 | K 1   | <b>147.1128</b>  | <b>74.0600</b>  |

[\[Click\]](#) to move table

Static Modifications:  
 C: 57.02146  
 M: 3.0189

Variable Modifications:  
 K: 51.1038



# eEF1A

## R.GITIDIALWtriKFETPK.Y [69, 83] (missed 1)

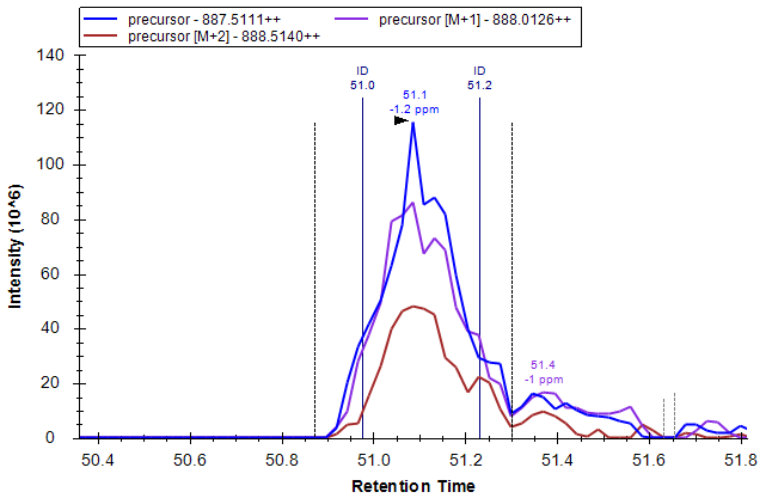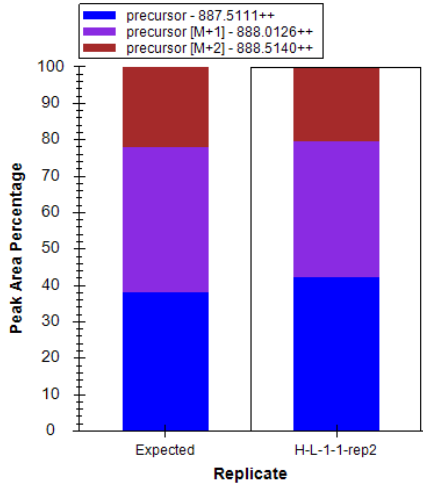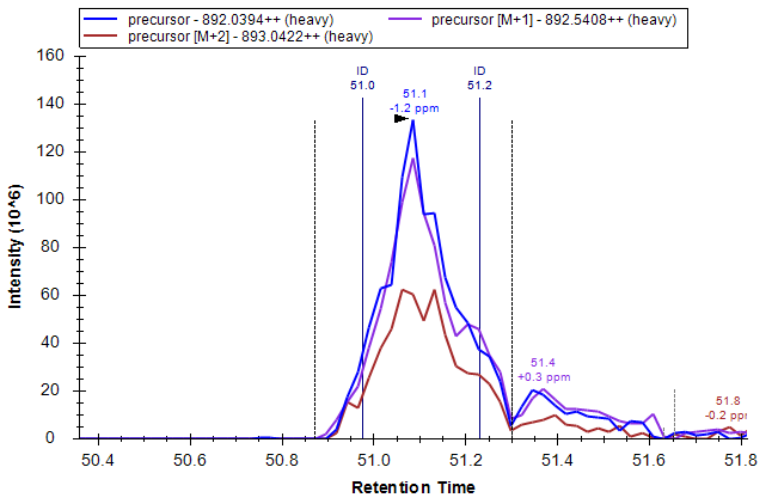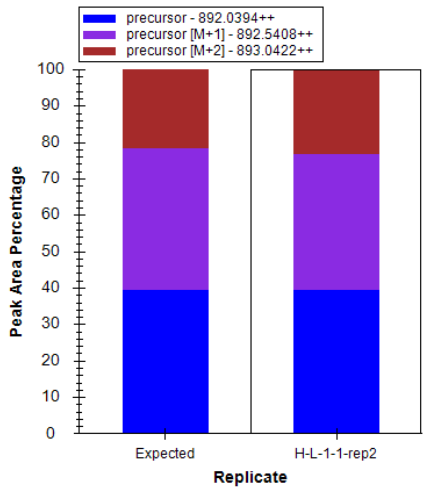

Replicate 2

# eEF1A

## R.GITIDIALWtriKFETPK.Y [69, 83] (missed 1)

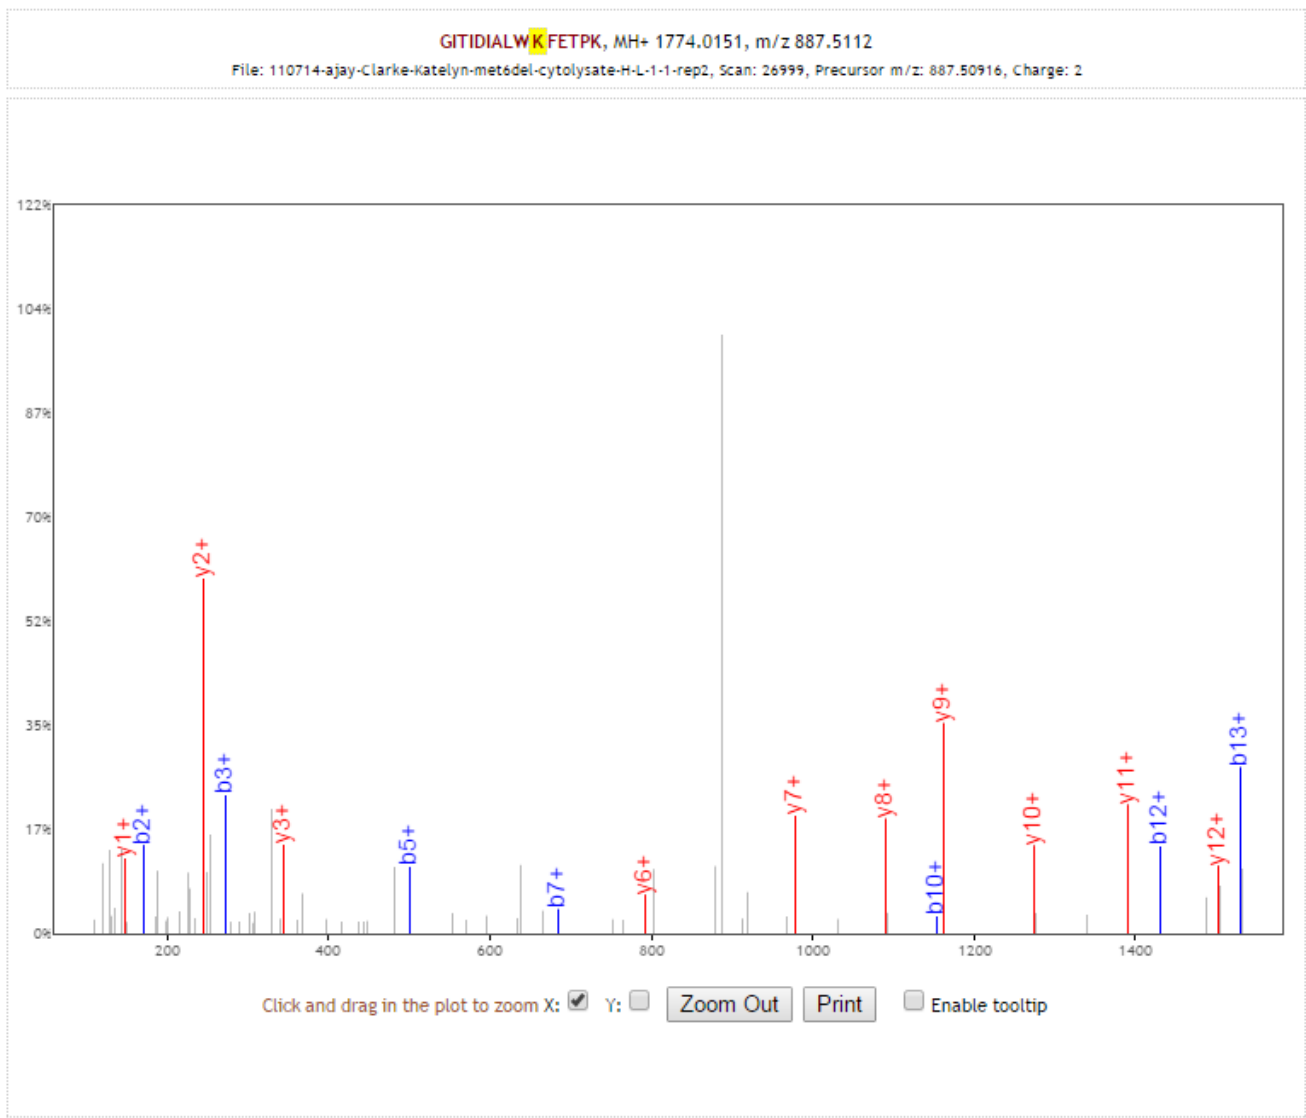

| b+        | #  | Seq # | y+        |
|-----------|----|-------|-----------|
| 58.0287   | 1  | G 15  |           |
| 171.1128  | 2  | I 14  | 1716.9936 |
| 272.1605  | 3  | T 13  | 1603.9096 |
| 385.2445  | 4  | I 12  | 1502.8619 |
| 500.2715  | 5  | D 11  | 1389.7778 |
| 613.3556  | 6  | I 10  | 1274.7509 |
| 684.3927  | 7  | A 9   | 1161.6668 |
| 797.4767  | 8  | L 8   | 1090.6297 |
| 983.5560  | 9  | W 7   | 977.5456  |
| 1153.6981 | 10 | K 6   | 791.4663  |
| 1300.7665 | 11 | F 5   | 621.3243  |
| 1429.8091 | 12 | E 4   | 474.2558  |
| 1530.8568 | 13 | T 3   | 345.2132  |
| 1627.9096 | 14 | P 2   | 244.1656  |
|           | 15 | K 1   | 147.1128  |

[\[click\]](#) to move table

Static Modifications:  
C: 57.02146

Variable Modifications:  
K: 42.0471

# eEF1A

## R.GITIDIALWtriKFETPK.Y [69, 83] (missed 1)

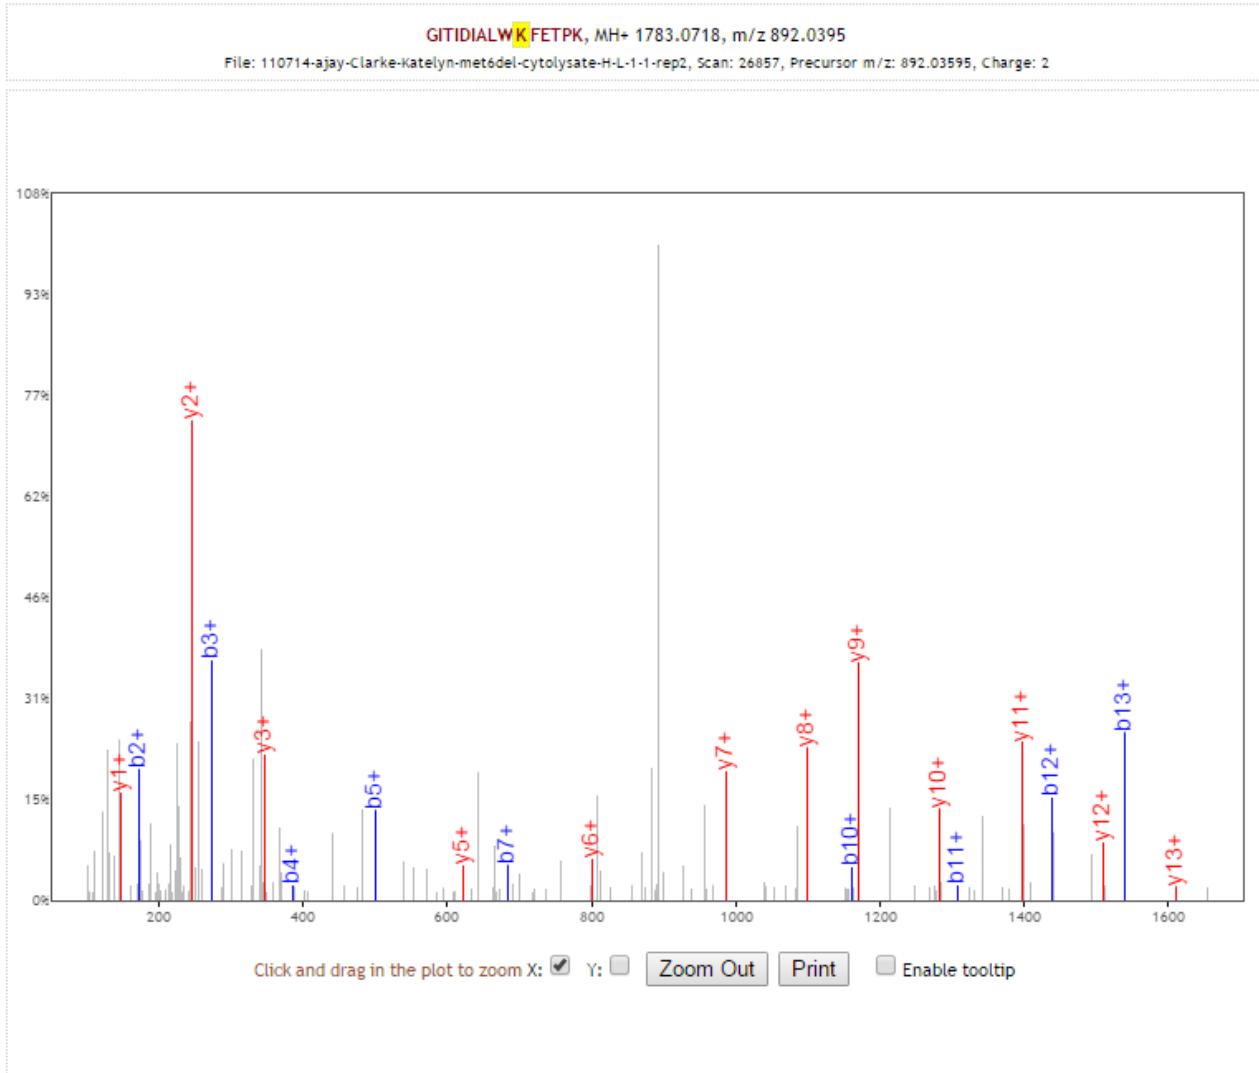

| b+        | #  | Seq | #  | y+        |
|-----------|----|-----|----|-----------|
| 58.0287   | 1  | G   | 15 |           |
| 171.1128  | 2  | I   | 14 | 1726.0503 |
| 272.1605  | 3  | T   | 13 | 1612.9663 |
| 385.2445  | 4  | I   | 12 | 1511.9186 |
| 500.2715  | 5  | D   | 11 | 1398.8345 |
| 613.3556  | 6  | I   | 10 | 1283.8076 |
| 684.3927  | 7  | A   | 9  | 1170.7235 |
| 797.4767  | 8  | L   | 8  | 1099.6864 |
| 983.5560  | 9  | W   | 7  | 986.6023  |
| 1162.7548 | 10 | K   | 6  | 800.5230  |
| 1309.8232 | 11 | F   | 5  | 621.3243  |
| 1438.8658 | 12 | E   | 4  | 474.2558  |
| 1539.9135 | 13 | T   | 3  | 345.2132  |
| 1636.9663 | 14 | P   | 2  | 244.1656  |
|           | 15 | K   | 1  | 147.1128  |

[\[click\]](#) to move table

Static Modifications:  
 C: 57.02146  
 M: 3.0189

Variable Modifications:  
 K: 51.1038

# eEF1A

## R.GITIDIALWtriKFETPK.Y [69, 83] (missed 1)

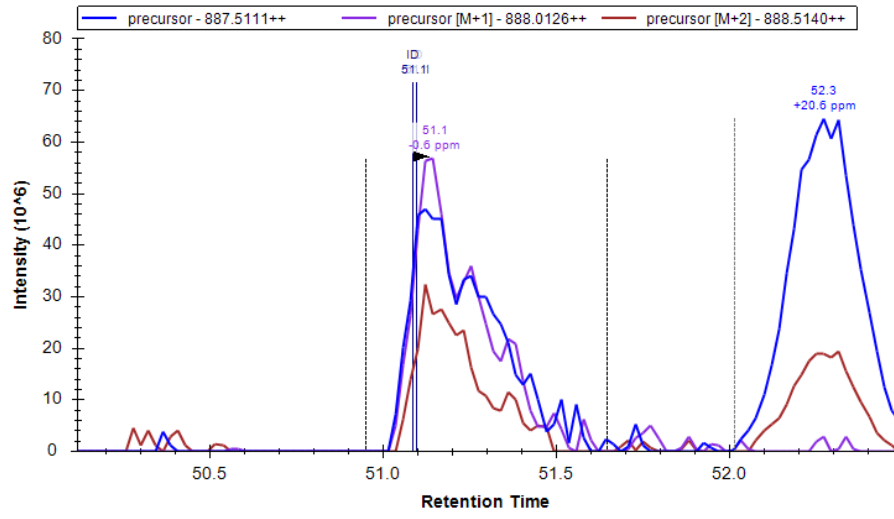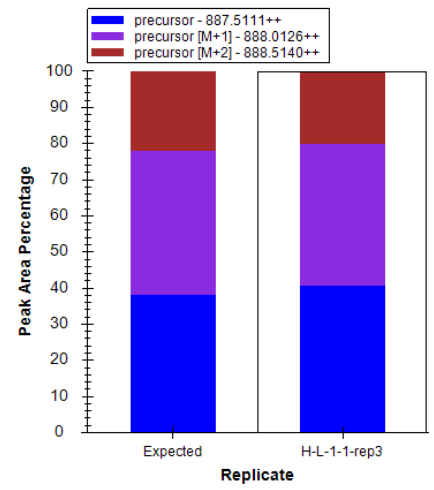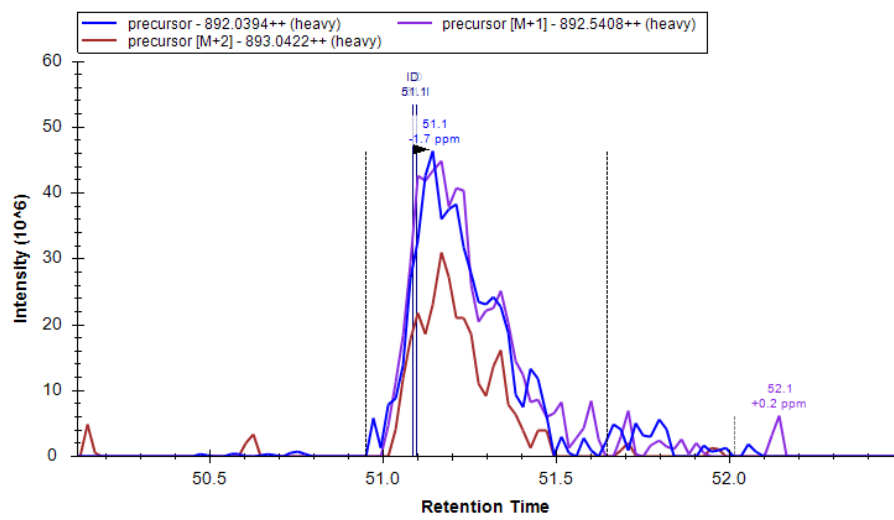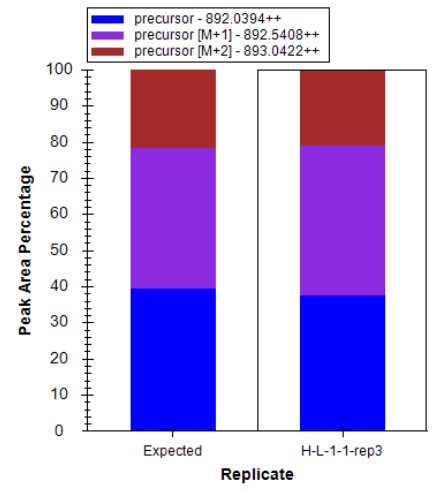

Replicate 3

# eEF1A

## R.GITIDIALWtri**K**FETPK.Y [69, 83] (missed 1)

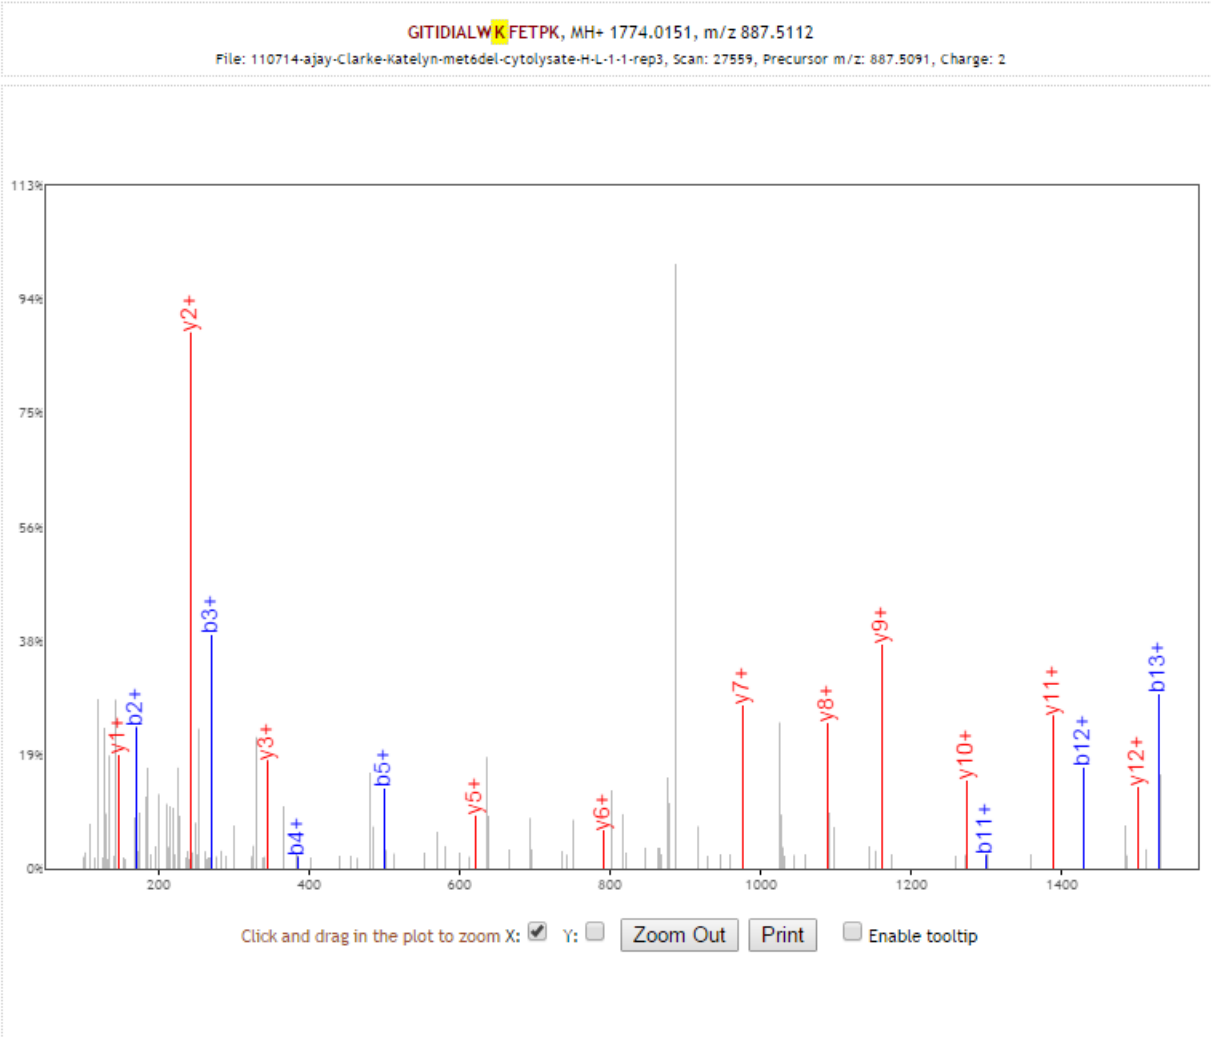

| b+        | #  | Seq # | y+        |
|-----------|----|-------|-----------|
| 58.0287   | 1  | G 15  |           |
| 171.1128  | 2  | I 14  | 1716.9936 |
| 272.1605  | 3  | T 13  | 1603.9096 |
| 385.2445  | 4  | I 12  | 1502.8619 |
| 500.2715  | 5  | D 11  | 1389.7778 |
| 613.3556  | 6  | I 10  | 1274.7509 |
| 684.3927  | 7  | A 9   | 1161.6668 |
| 797.4767  | 8  | L 8   | 1090.6297 |
| 983.5560  | 9  | W 7   | 977.5456  |
| 1153.6981 | 10 | K 6   | 791.4663  |
| 1300.7665 | 11 | F 5   | 621.3243  |
| 1429.8091 | 12 | E 4   | 474.2558  |
| 1530.8568 | 13 | T 3   | 345.2132  |
| 1627.9096 | 14 | P 2   | 244.1656  |
|           | 15 | K 1   | 147.1128  |

[\[Click\]](#) to move table

Static Modifications:  
 C: 57.02146

Variable Modifications:  
 K: 42.0471

# eEF1A

## R.GITIDIALWtriKFETPK.Y [69, 83] (missed 1)

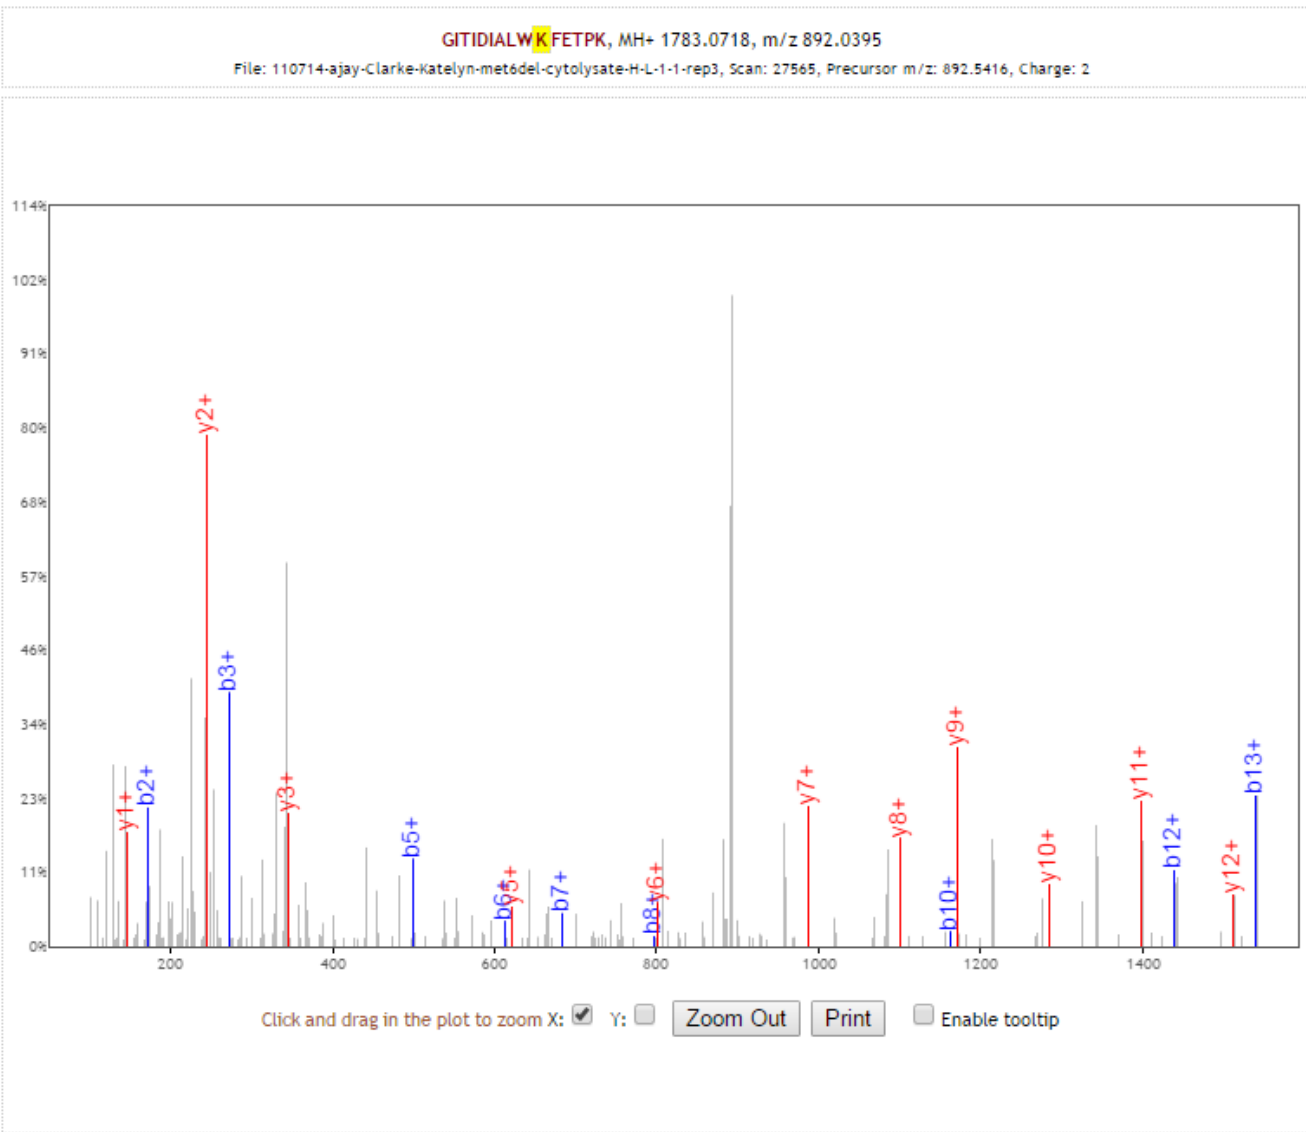

| b+        | #  | Seq # | y+        |
|-----------|----|-------|-----------|
| 58.0287   | 1  | G 15  |           |
| 171.1128  | 2  | I 14  | 1726.0503 |
| 272.1605  | 3  | T 13  | 1612.9663 |
| 385.2445  | 4  | I 12  | 1511.9186 |
| 500.2715  | 5  | D 11  | 1398.8345 |
| 613.3556  | 6  | I 10  | 1283.8076 |
| 684.3927  | 7  | A 9   | 1170.7235 |
| 797.4767  | 8  | L 8   | 1099.6864 |
| 983.5560  | 9  | W 7   | 986.6023  |
| 1162.7548 | 10 | K 6   | 800.5230  |
| 1309.8232 | 11 | F 5   | 621.3243  |
| 1438.8658 | 12 | E 4   | 474.2558  |
| 1539.9135 | 13 | T 3   | 345.2132  |
| 1636.9663 | 14 | P 2   | 244.1656  |
|           | 15 | K 1   | 147.1128  |

[\[Click\]](#) to move table

Static Modifications:  
 C: 57.02146  
 M: 3.0189

Variable Modifications:  
 K: 51.1038

# eEF1A

## K.KLEDHPmono**K**FLK.S [383, 392] (missed 2)

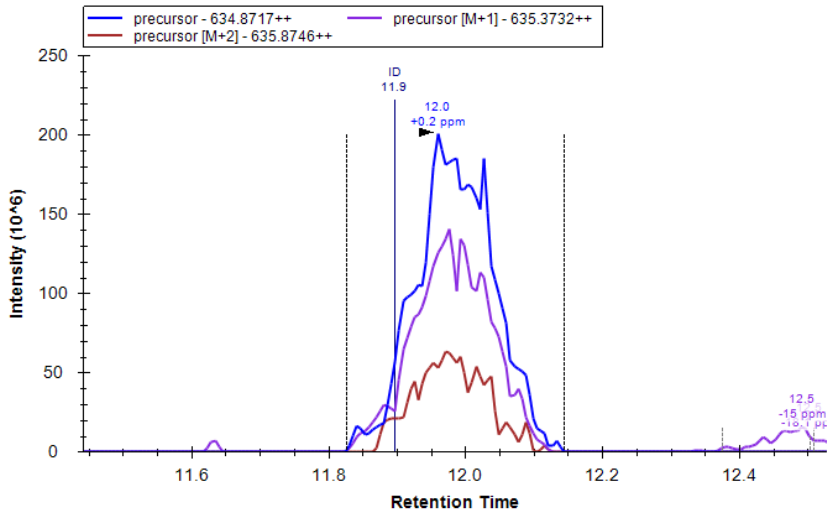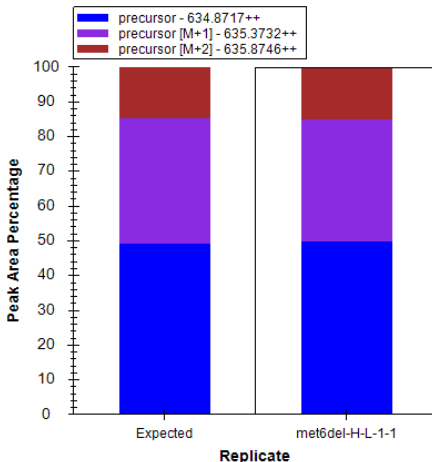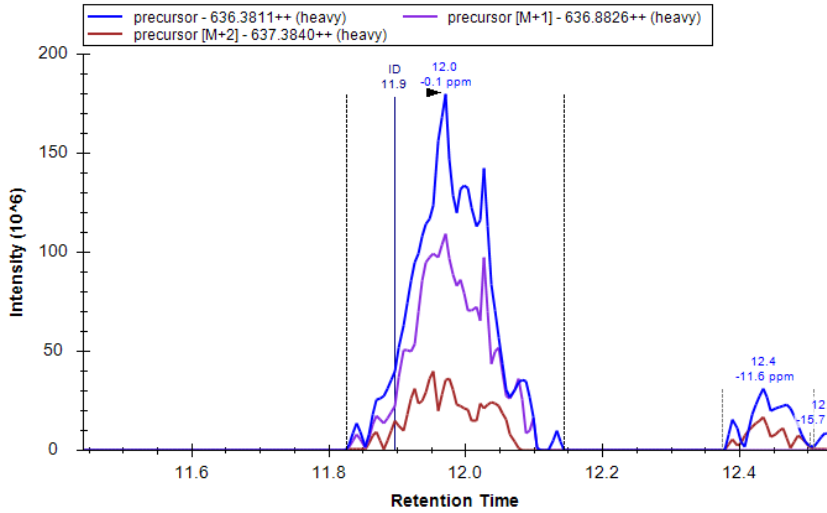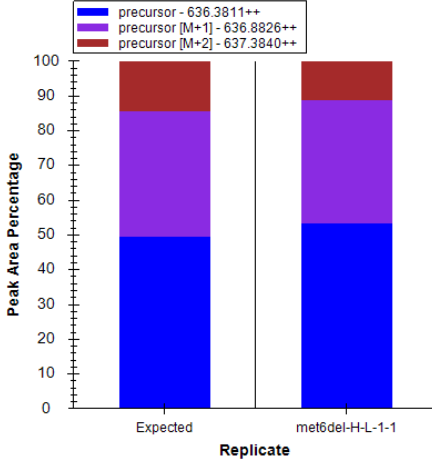

Replicate 1

# eEF1A

## K.KLEDHPmono**K**FLK.S [383, 392] (missed 2)

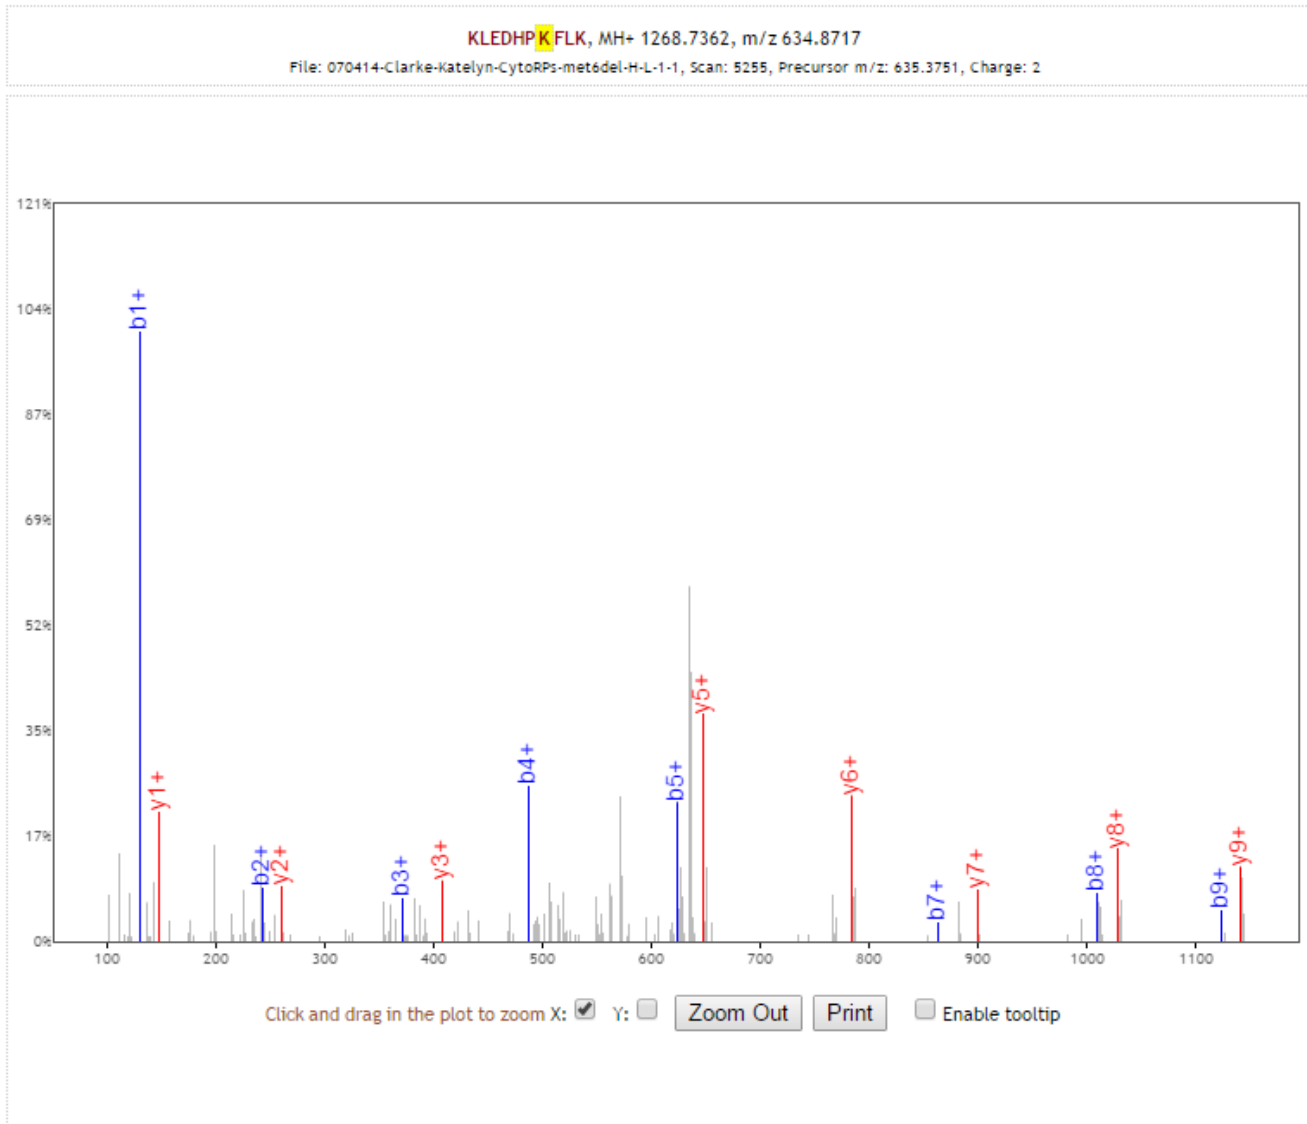

| b+        | #  | Seq # | y+        |
|-----------|----|-------|-----------|
| 129.1022  | 1  | K 10  |           |
| 242.1863  | 2  | L 9   | 1140.6412 |
| 371.2289  | 3  | E 8   | 1027.5572 |
| 486.2558  | 4  | D 7   | 898.5146  |
| 623.3148  | 5  | H 6   | 783.4876  |
| 720.3675  | 6  | P 5   | 646.4287  |
| 862.4782  | 7  | K 4   | 549.3759  |
| 1009.5466 | 8  | F 3   | 407.2653  |
| 1122.6307 | 9  | L 2   | 260.1969  |
|           | 10 | K 1   | 147.1128  |

[\[Click\]](#) to move table

Static Modifications:  
C: 57.02146

Variable Modifications:  
K: 14.0157



# eEF1A

K.STTTGHLIYmono**K**CGGIDmono**K**.R [20, 35] (missed 1)

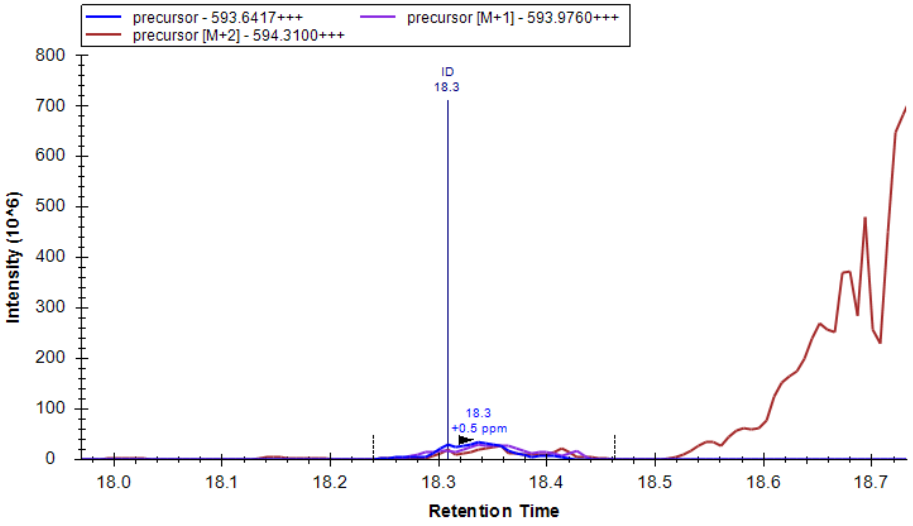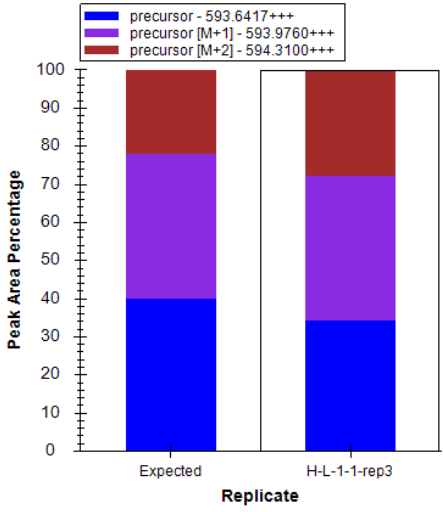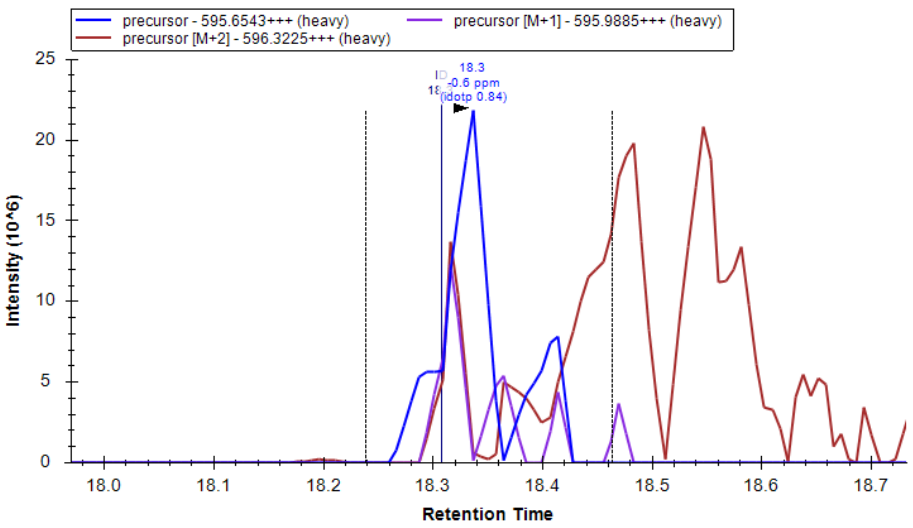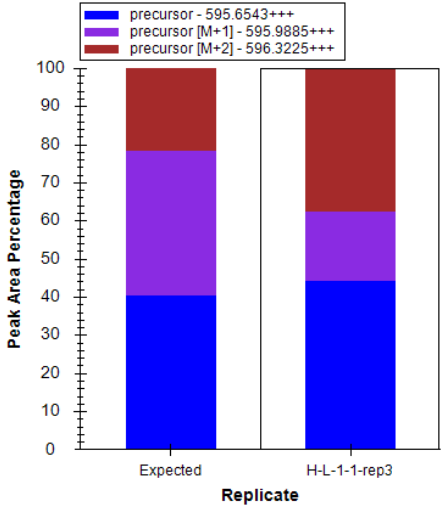

Replicate 3

# eEF1A

K.STTTGHLIYmono**K**CGGIDmono**K**.R [20, 35] (missed 1)

STTTGHLIY**K**CGGID**K**, MH+ 1778.9106, m/z 593.6417

File: 110714-ajay-Clarke-Katelyn-metódel-cytolysate-H-L-1-1-rep3, Scan: 7854, Precursor m/z: 593.9748, Charge: 3

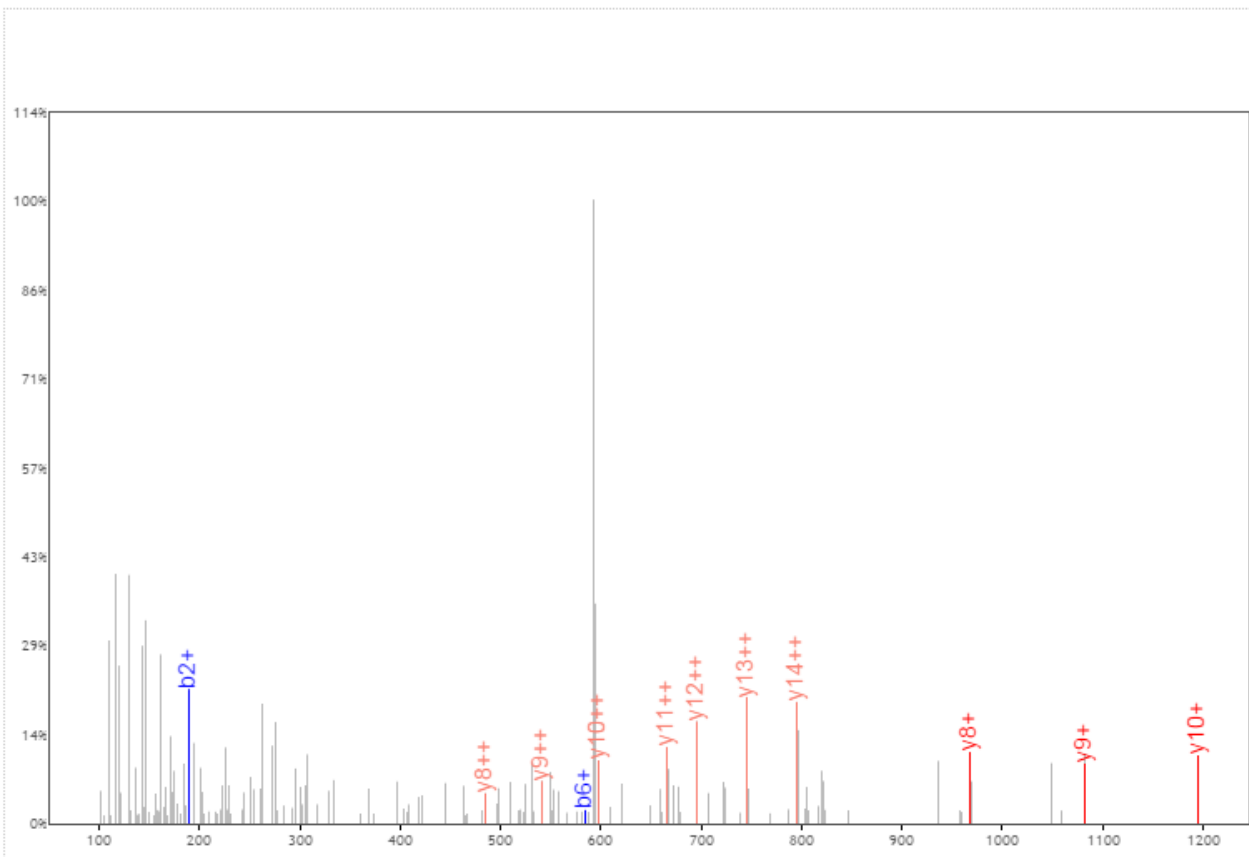

Click and drag in the plot to zoom X:  Y:  Zoom Out Print  Enable tooltip

| b+              | b2+      | #  | Seq #      | y+               | y2+      |
|-----------------|----------|----|------------|------------------|----------|
| 88.0393         | 44.5233  | 1  | S 16       |                  |          |
| <b>189.0870</b> | 95.0471  | 2  | T 15       | 1691.8786        | 846.4429 |
| 290.1347        | 145.5710 | 3  | T 14       | 1590.8309        | 795.9191 |
| 391.1823        | 196.0948 | 4  | T 13       | 1489.7833        | 745.3953 |
| 448.2038        | 224.6055 | 5  | G 12       | 1388.7356        | 694.8714 |
| <b>585.2627</b> | 293.1350 | 6  | H 11       | 1331.7141        | 666.3607 |
| 698.3468        | 349.6770 | 7  | L 10       | <b>1194.6552</b> | 597.8312 |
| 811.4308        | 406.2191 | 8  | I 9        | <b>1081.5711</b> | 541.2892 |
| 974.4942        | 487.7507 | 9  | Y 8        | <b>968.4871</b>  | 484.7472 |
| 1116.6048       | 558.8061 | 10 | <b>K</b> 7 | 805.4237         | 403.2155 |
| 1276.6355       | 638.8214 | 11 | C 6        | 663.3131         | 332.1602 |
| 1333.6569       | 667.3321 | 12 | G 5        | 503.2824         | 252.1449 |
| 1390.6784       | 695.8428 | 13 | G 4        | 446.2610         | 223.6341 |
| 1503.7625       | 752.3849 | 14 | I 3        | 389.2395         | 195.1234 |
| 1618.7894       | 809.8983 | 15 | D 2        | 276.1554         | 138.5814 |
|                 |          | 16 | <b>K</b> 1 | 161.1285         | 81.0679  |

[\[click\]](#) to move table

Static Modifications:  
C: 57.02146

Variable Modifications:  
K: 14.0157

# Rpl12ab

## K.IQNmono**R**QAAASVVPSASSLVITALK.E [63, 85] (missed 1)

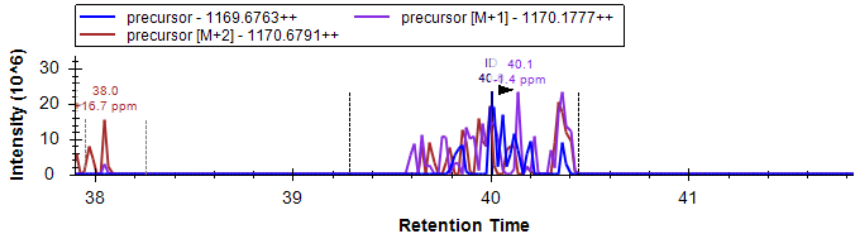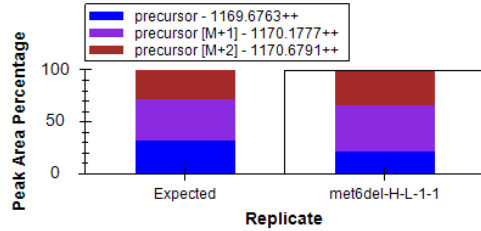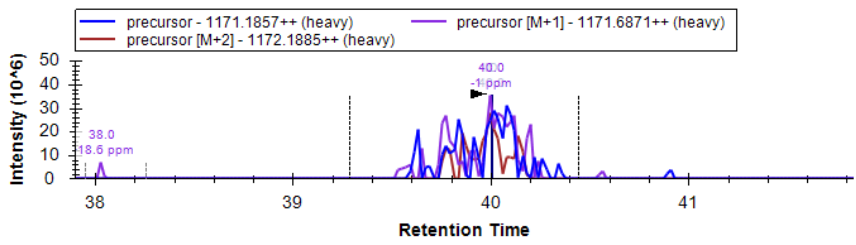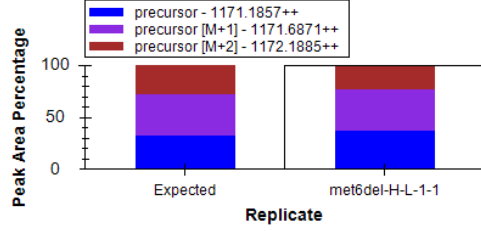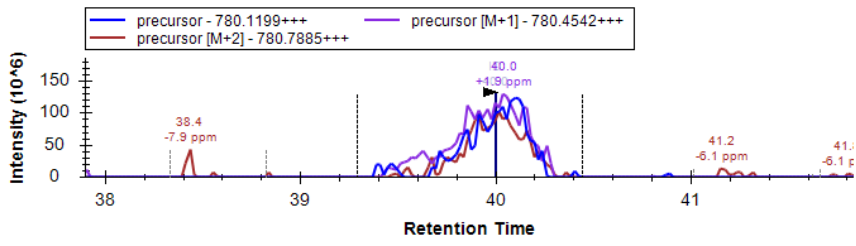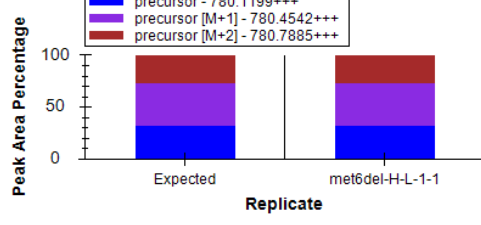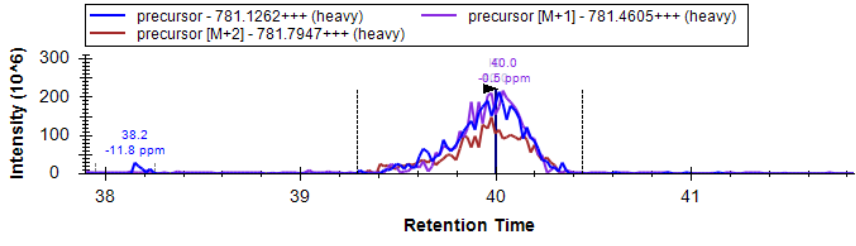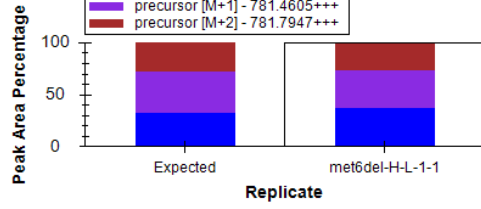

Replicate 1

# Rpl12ab

## K.IQNmono**R**QAAASVVPSASSLVITALK.E [63, 85] (missed 1)

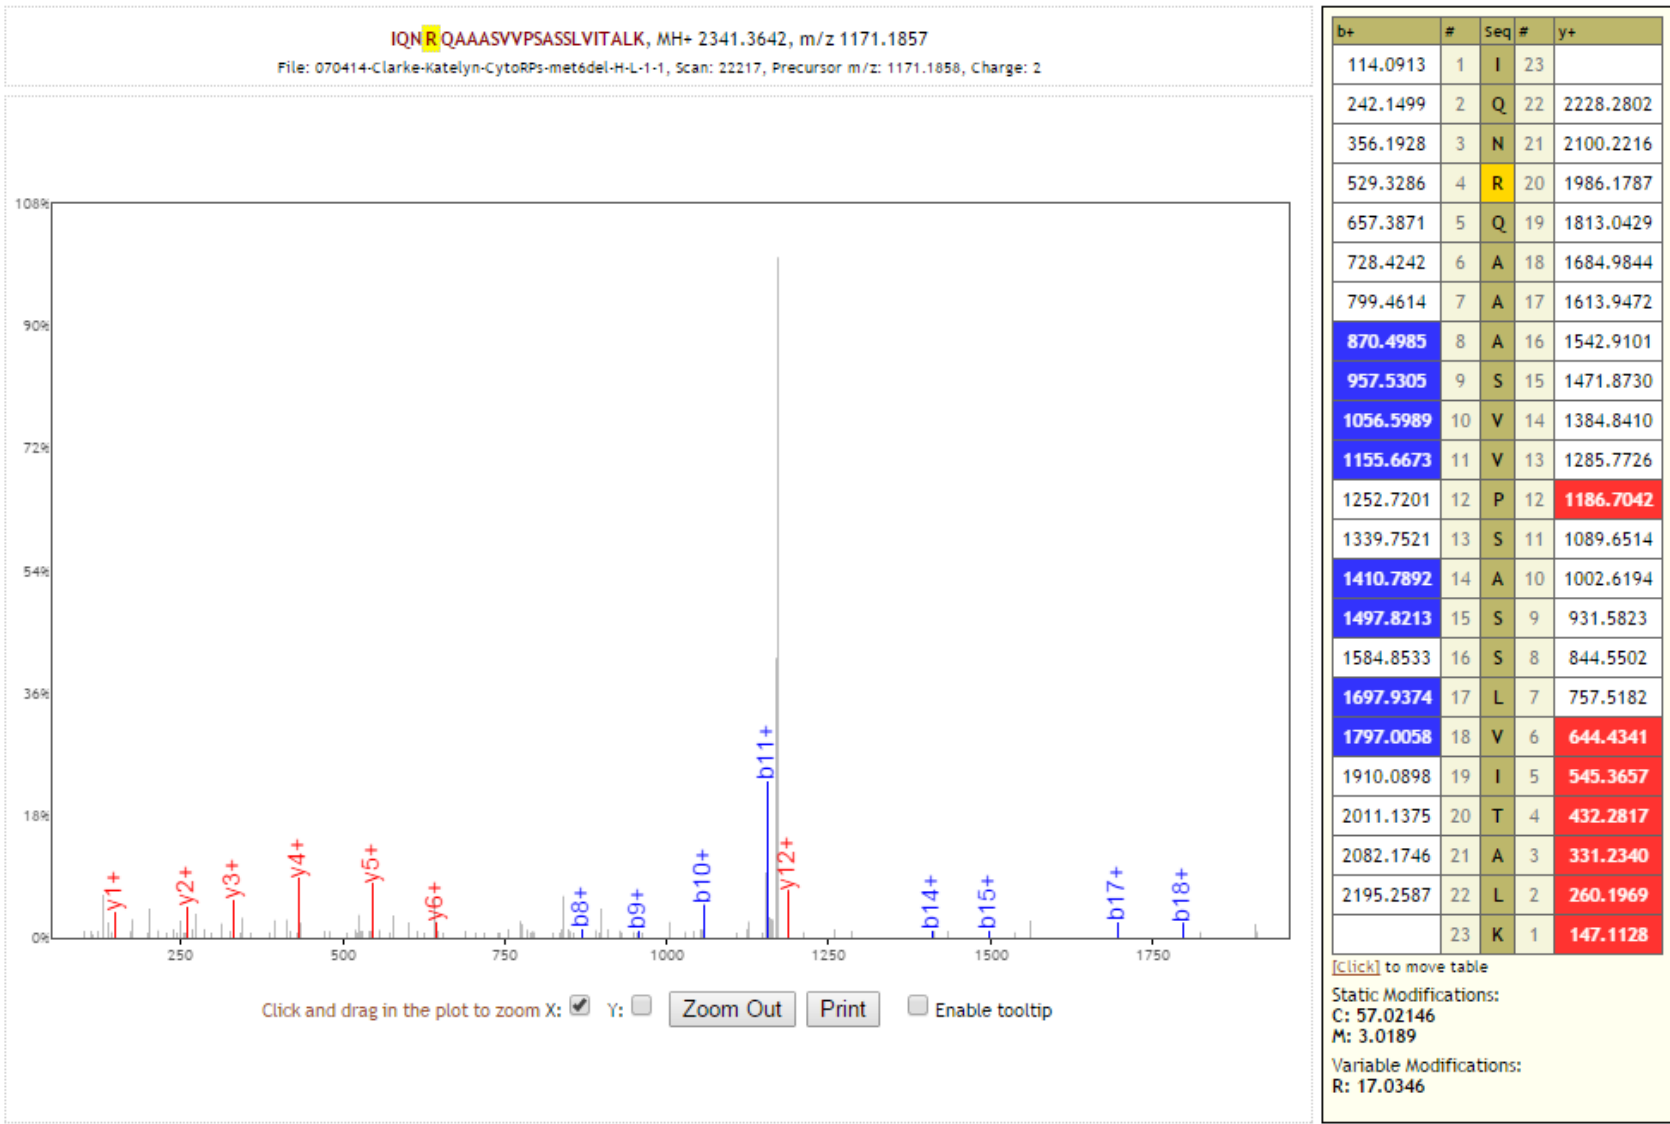

# Rpl12ab

## K.IQNmono**R**QAAASVVPSASSLVITALK.E [63, 85] (missed 1)

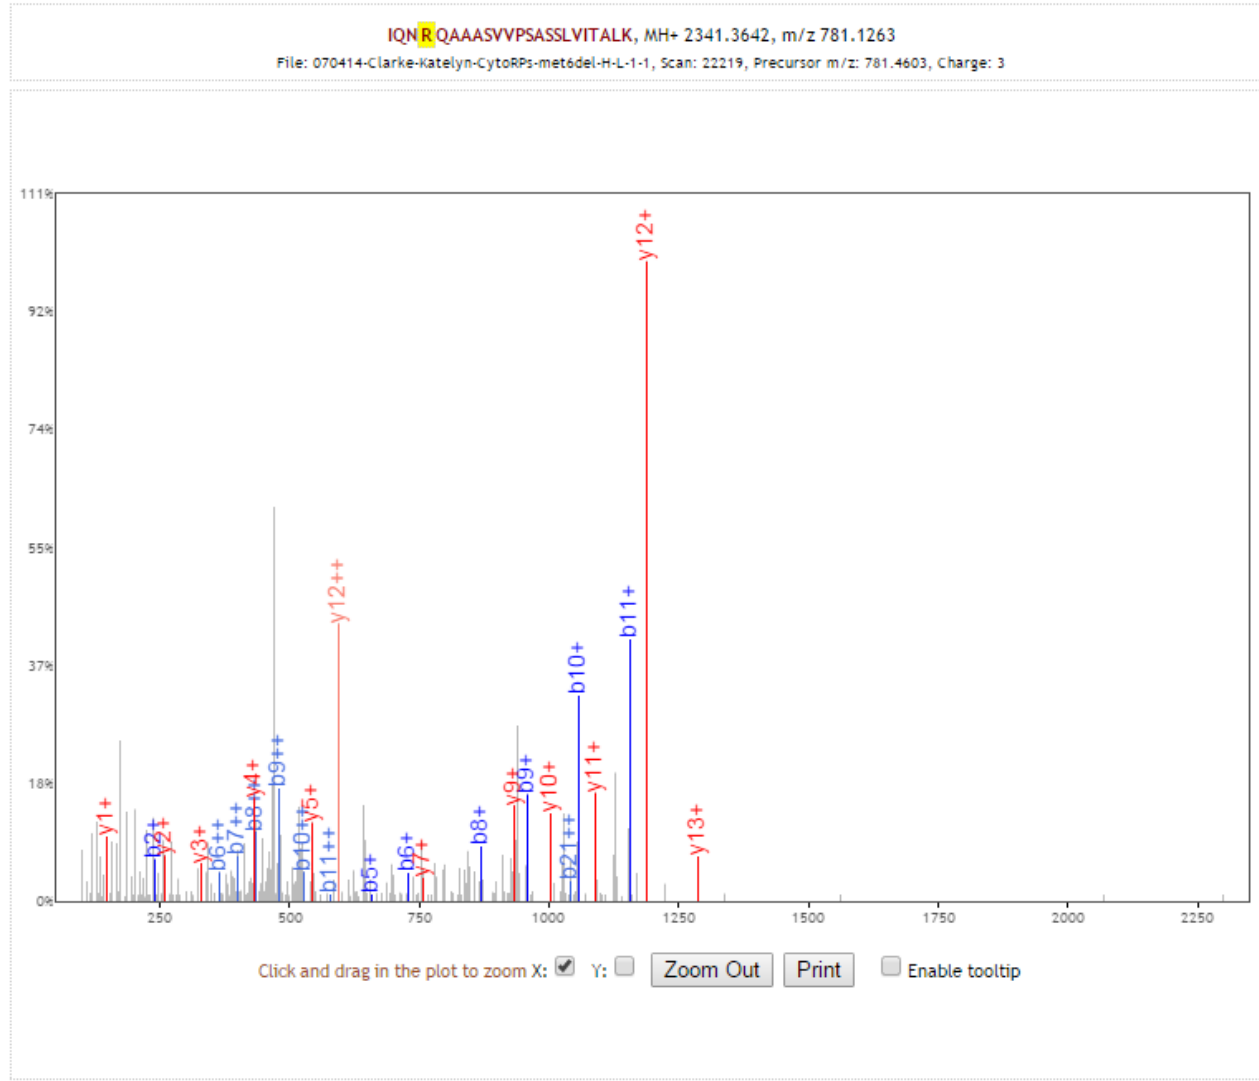

| b+               | b2+              | #  | Seq #       | y+               | y2+             |
|------------------|------------------|----|-------------|------------------|-----------------|
| 114.0913         | 57.5493          | 1  | I 23        |                  |                 |
| <b>242.1499</b>  | 121.5786         | 2  | Q 22        | 2228.2802        | 1114.6437       |
| 356.1928         | 178.6001         | 3  | N 21        | 2100.2216        | 1050.6144       |
| 529.3286         | 265.1679         | 4  | <b>R</b> 20 | 1986.1787        | 993.5930        |
| <b>657.3871</b>  | 329.1972         | 5  | Q 19        | 1813.0429        | 907.0251        |
| <b>728.4242</b>  | 364.7158         | 6  | A 18        | 1684.9844        | 842.9958        |
| 799.4614         | 400.2343         | 7  | A 17        | 1613.9472        | 807.4773        |
| <b>870.4985</b>  | 435.7529         | 8  | A 16        | 1542.9101        | 771.9587        |
| <b>957.5305</b>  | 479.2689         | 9  | S 15        | 1471.8730        | 736.4401        |
| <b>1056.5989</b> | 528.8031         | 10 | V 14        | 1384.8410        | 692.9241        |
| <b>1155.6673</b> | 578.3373         | 11 | V 13        | <b>1285.7726</b> | 643.3899        |
| 1252.7201        | 626.8637         | 12 | P 12        | <b>1186.7042</b> | <b>593.8557</b> |
| 1339.7521        | 670.3797         | 13 | S 11        | <b>1089.6514</b> | 545.3293        |
| 1410.7892        | 705.8983         | 14 | A 10        | <b>1002.6194</b> | 501.8133        |
| 1497.8213        | 749.4143         | 15 | S 9         | <b>931.5823</b>  | 466.2948        |
| 1584.8533        | 792.9303         | 16 | S 8         | 844.5502         | 422.7788        |
| 1697.9374        | 849.4723         | 17 | L 7         | <b>757.5182</b>  | 379.2627        |
| 1797.0058        | 899.0065         | 18 | V 6         | 644.4341         | 322.7207        |
| 1910.0898        | 955.5486         | 19 | I 5         | <b>545.3657</b>  | 273.1865        |
| 2011.1375        | 1006.0724        | 20 | T 4         | <b>432.2817</b>  | 216.6445        |
| 2082.1746        | <b>1041.5910</b> | 21 | A 3         | <b>331.2340</b>  | 166.1206        |
| 2195.2587        | 1098.1330        | 22 | L 2         | <b>260.1969</b>  | 130.6021        |
|                  |                  | 23 | K 1         | <b>147.1128</b>  | 74.0600         |

[\[click\]](#) to move table  
 Static Modifications:  
 C: 57.02146  
 M: 3.0189  
 Variable Modifications:  
 R: 17.0346

# Rpl12ab

## K.IQNmonoRQAAASVVPSASSLVITALK.E [63, 85] (missed 1)

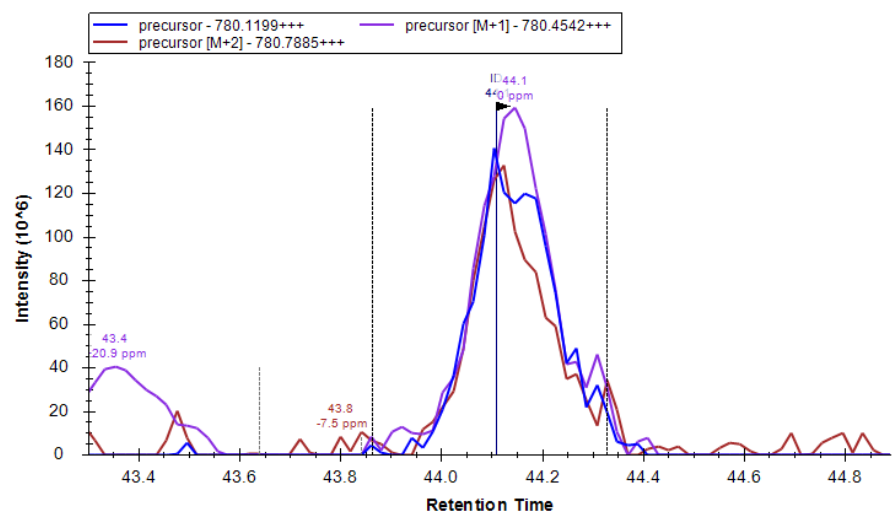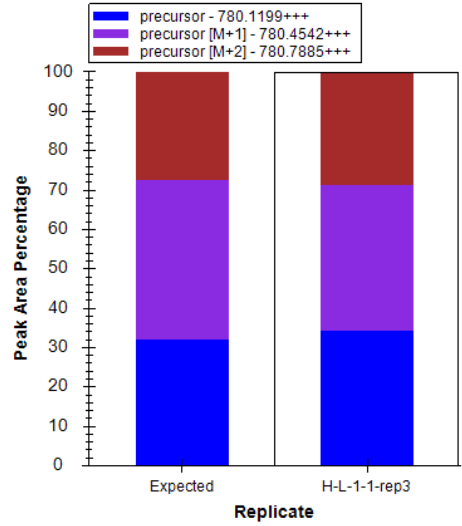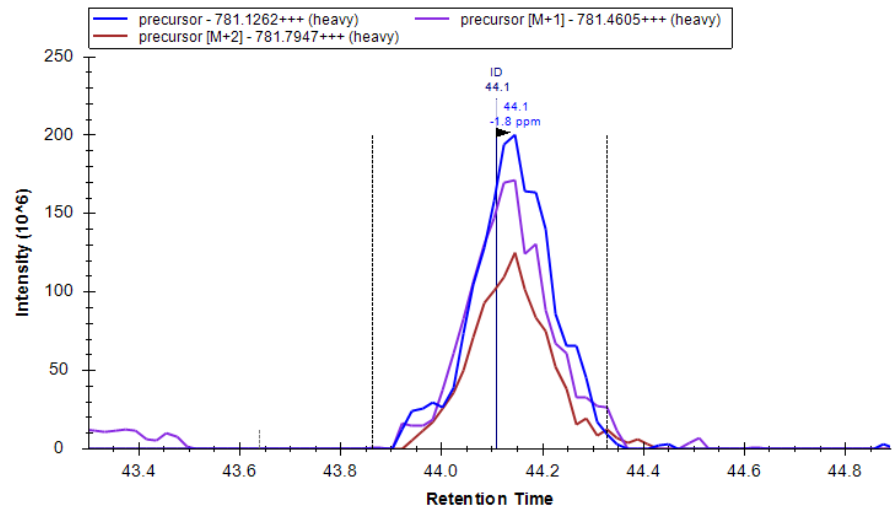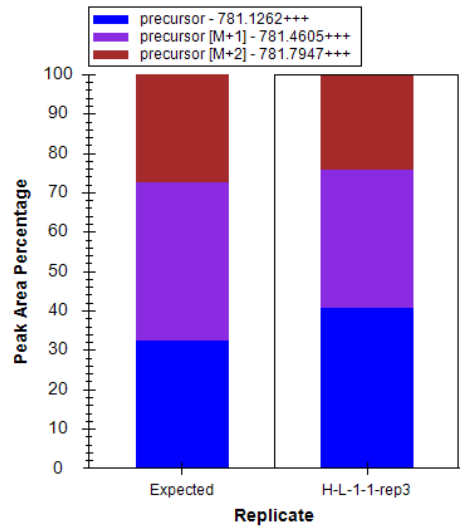

Replicate 3

# Rpl12ab

K.IQNmono**R**QAAASVVPSASSLVITALK.E [63, 85] (missed 1)

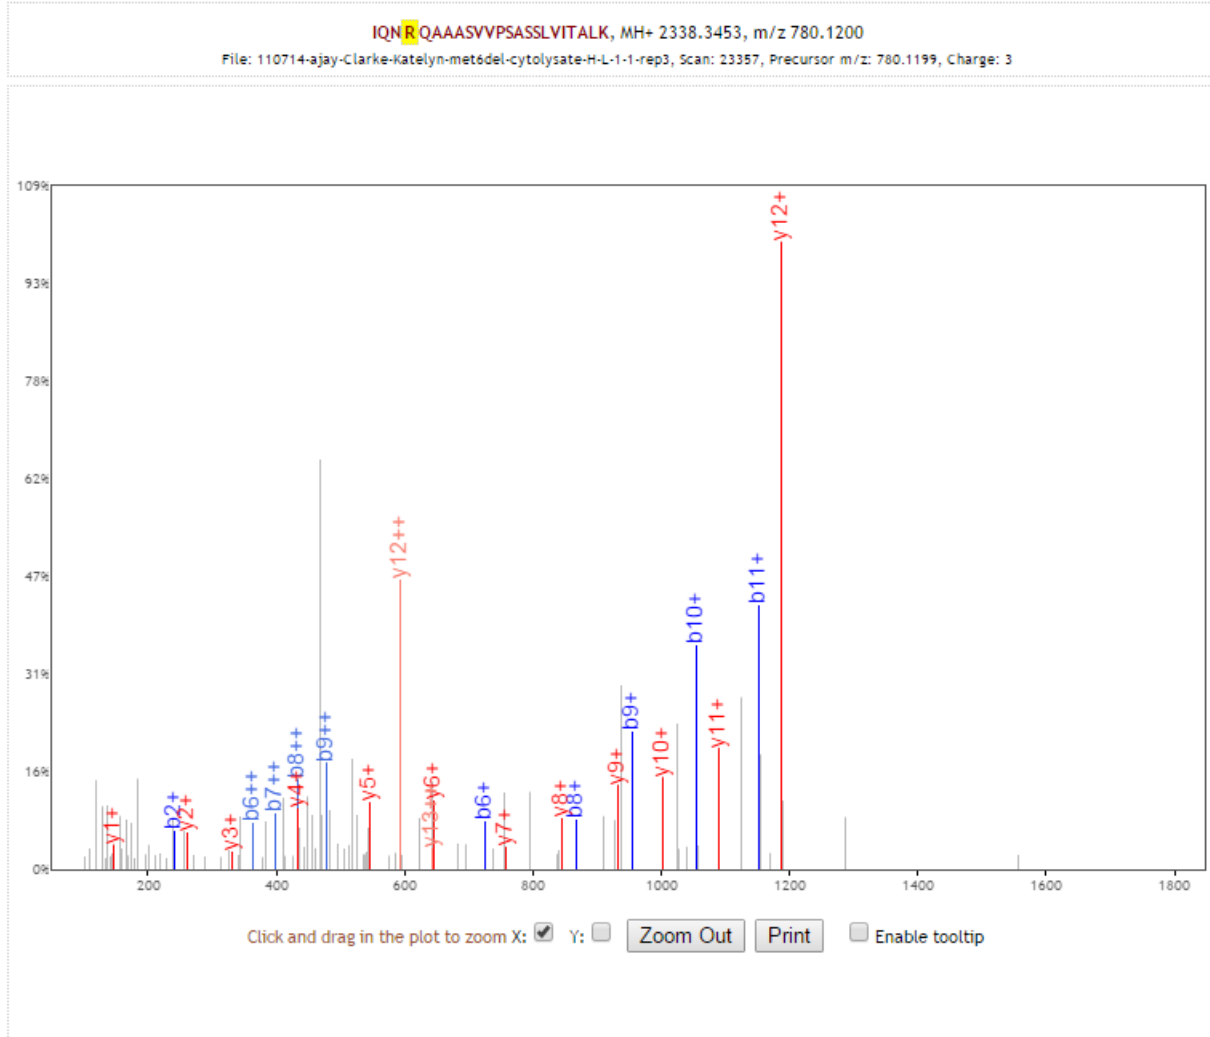

| b+        | b2+       | #  | Seq # | y+        | y2+       |
|-----------|-----------|----|-------|-----------|-----------|
| 114.0913  | 57.5493   | 1  | I 23  |           |           |
| 242.1499  | 121.5786  | 2  | Q 22  | 2225.2613 | 1113.1343 |
| 356.1928  | 178.6001  | 3  | N 21  | 2097.2027 | 1049.1050 |
| 526.3097  | 263.6585  | 4  | R 20  | 1983.1598 | 992.0835  |
| 654.3682  | 327.6878  | 5  | Q 19  | 1813.0429 | 907.0251  |
| 725.4053  | 363.2063  | 6  | A 18  | 1684.9844 | 842.9958  |
| 796.4425  | 398.7249  | 7  | A 17  | 1613.9472 | 807.4773  |
| 867.4796  | 434.2434  | 8  | A 16  | 1542.9101 | 771.9587  |
| 954.5116  | 477.7594  | 9  | S 15  | 1471.8730 | 736.4401  |
| 1053.5800 | 527.2936  | 10 | V 14  | 1384.8410 | 692.9241  |
| 1152.6484 | 576.8279  | 11 | V 13  | 1285.7726 | 643.3899  |
| 1249.7012 | 625.3542  | 12 | P 12  | 1186.7042 | 593.8557  |
| 1336.7332 | 668.8702  | 13 | S 11  | 1089.6514 | 545.3293  |
| 1407.7703 | 704.3888  | 14 | A 10  | 1002.6194 | 501.8133  |
| 1494.8024 | 747.9048  | 15 | S 9   | 931.5823  | 466.2948  |
| 1581.8344 | 791.4208  | 16 | S 8   | 844.5502  | 422.7788  |
| 1694.9185 | 847.9629  | 17 | L 7   | 757.5182  | 379.2627  |
| 1793.9869 | 897.4971  | 18 | V 6   | 644.4341  | 322.7207  |
| 1907.0709 | 954.0391  | 19 | I 5   | 545.3657  | 273.1865  |
| 2008.1186 | 1004.5629 | 20 | T 4   | 432.2817  | 216.6445  |
| 2079.1557 | 1040.0815 | 21 | A 3   | 331.2340  | 166.1206  |
| 2192.2398 | 1096.6235 | 22 | L 2   | 260.1969  | 130.6021  |
|           |           | 23 | K 1   | 147.1128  | 74.0600   |

[\[Click\]](#) to move table  
 Static Modifications:  
 C: 57.02146  
 Variable Modifications:  
 R: 14.0157

# Rpl12ab

K.IQNmono**R**QAAASVVPSASSLVITALKEPPR.D [63, 89] (missed 2)

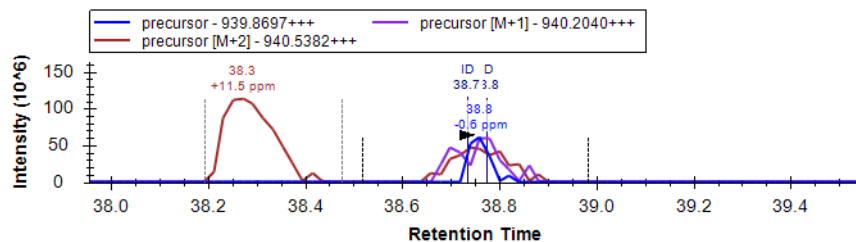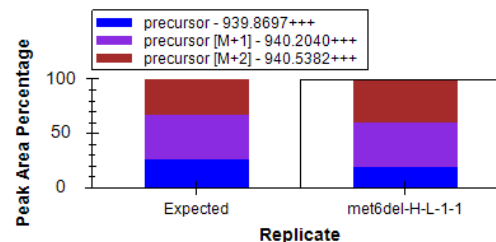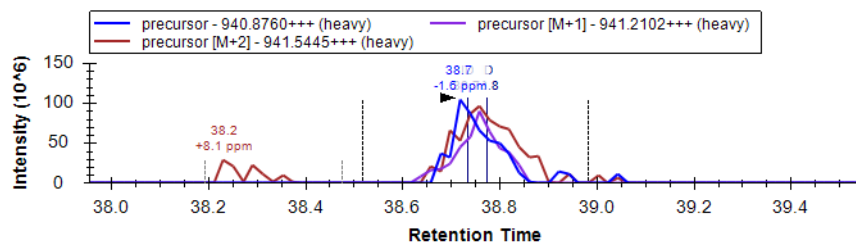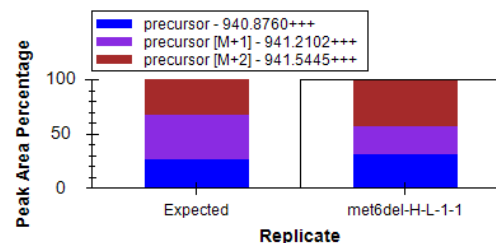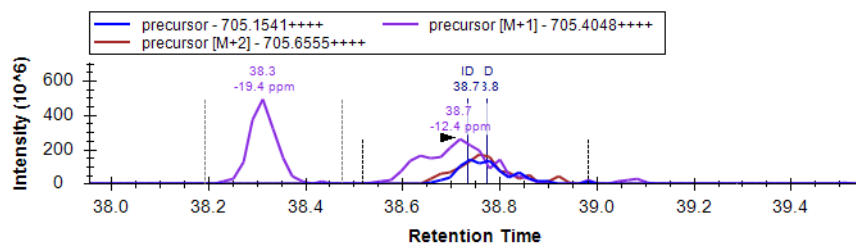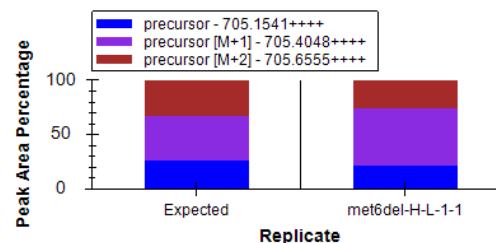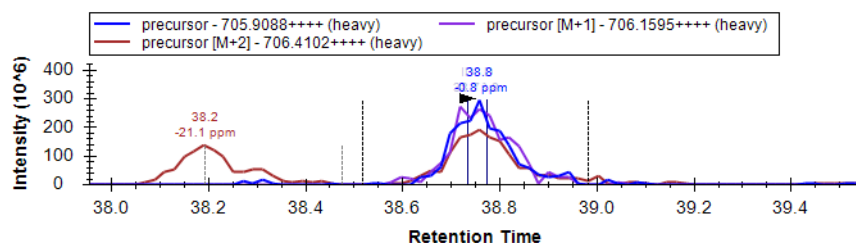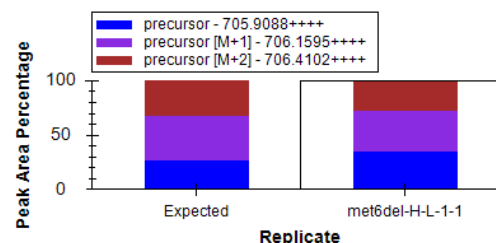

Replicate 1



# Rpl12ab

K.IQNmono**R**QAAASVVPSASSLVITALKEPPR.D [63, 89] (missed 2)

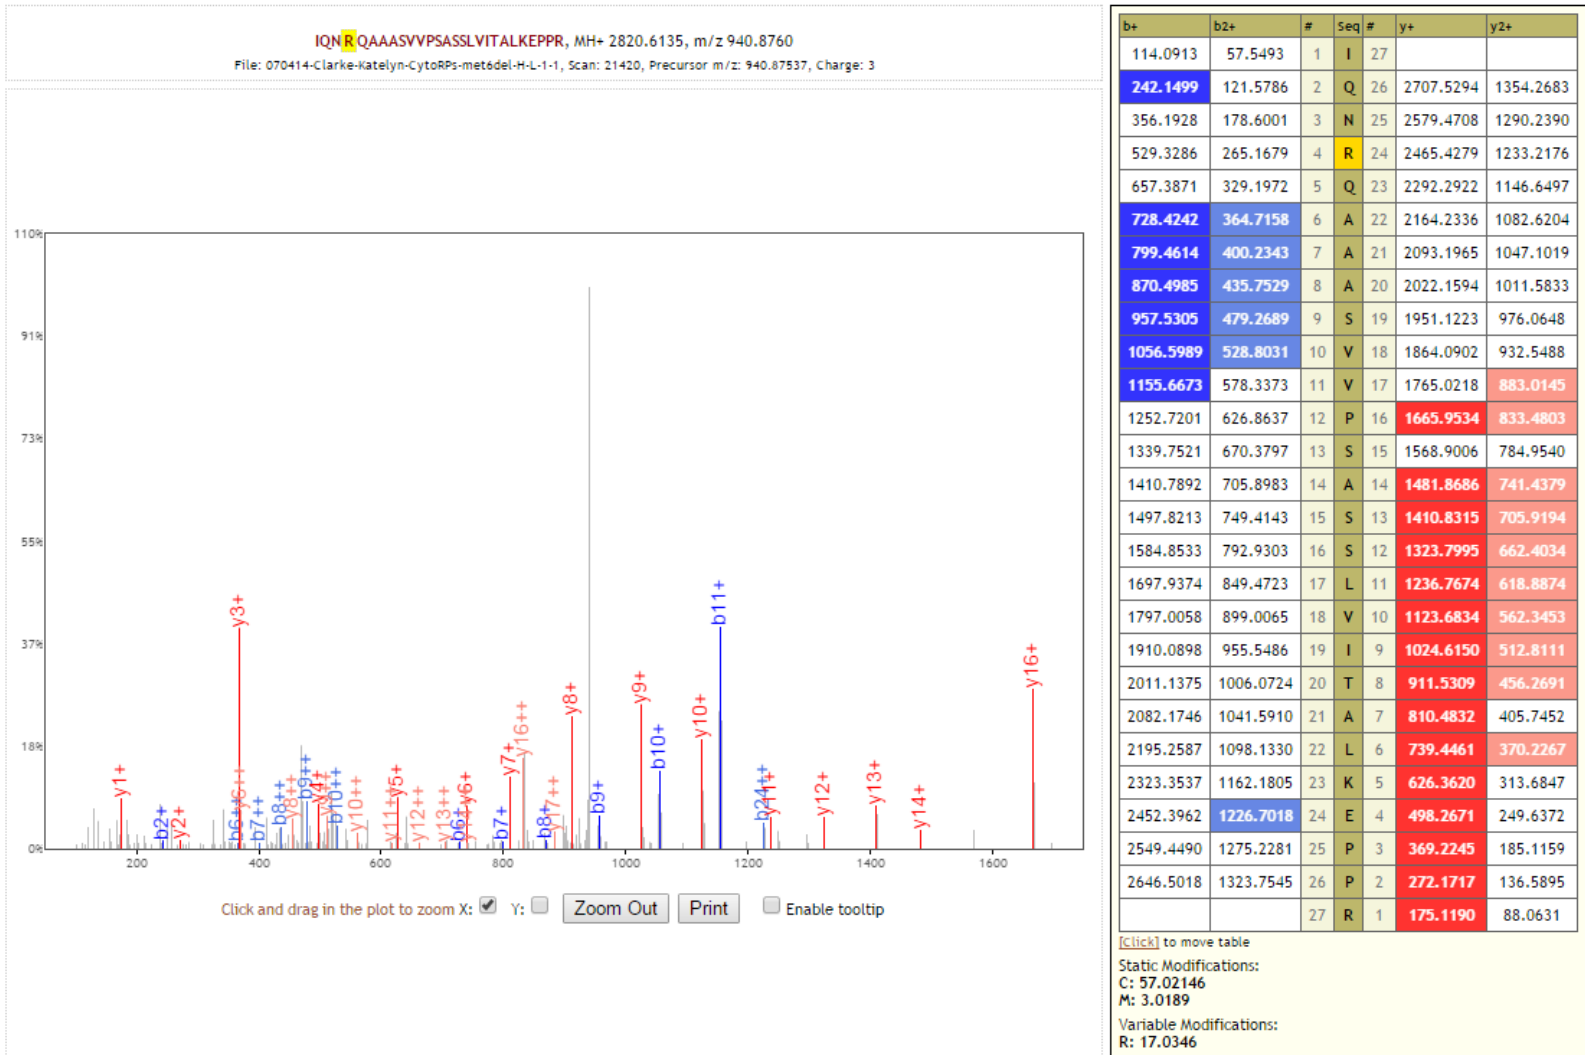

# Rpl12ab

K.IQNmono**R**QAAASVVPSASSLVITALKEPPR.D [63, 89] (missed 2)

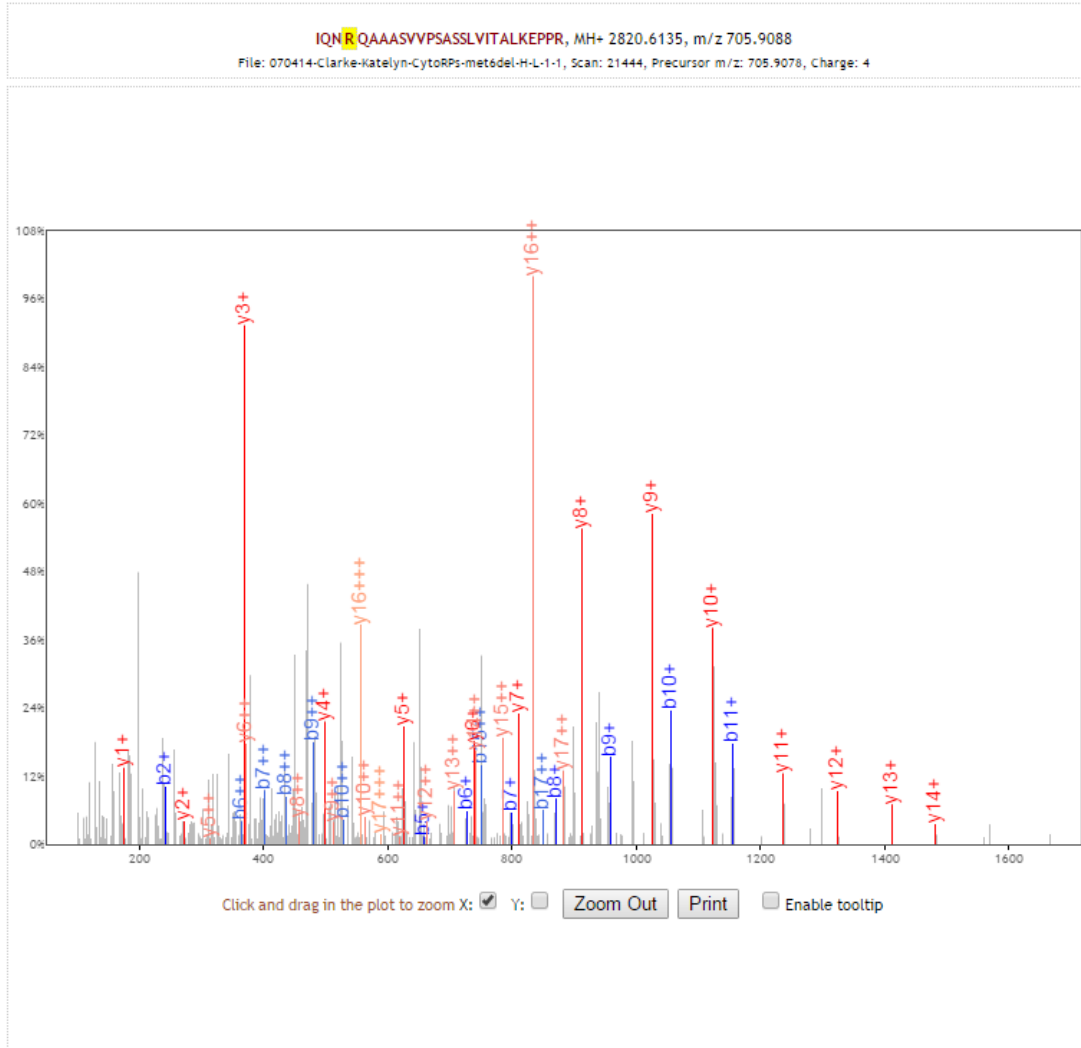

| b+        | b2+       | b3+      | #  | Seq # | y+ | y2+       | y3+       |
|-----------|-----------|----------|----|-------|----|-----------|-----------|
| 114.0913  | 57.5493   | 38.7020  | 1  | I     | 27 |           |           |
| 242.1499  | 121.5786  | 81.3882  | 2  | Q     | 26 | 2707.5294 | 1354.2683 |
| 356.1928  | 178.6001  | 119.4025 | 3  | N     | 25 | 2579.4708 | 1290.2390 |
| 529.3286  | 265.1679  | 177.1144 | 4  | R     | 24 | 2465.4279 | 1233.2176 |
| 657.3871  | 329.1972  | 219.8006 | 5  | Q     | 23 | 2292.2922 | 1146.6497 |
| 728.4242  | 364.7158  | 243.4796 | 6  | A     | 22 | 2164.2336 | 1082.6204 |
| 799.4614  | 400.2343  | 267.1586 | 7  | A     | 21 | 2093.1965 | 1047.1019 |
| 870.4985  | 435.7529  | 290.8377 | 8  | A     | 20 | 2022.1594 | 1011.5833 |
| 957.5305  | 479.2689  | 319.8484 | 9  | S     | 19 | 1951.1223 | 976.0648  |
| 1056.5989 | 528.8031  | 352.8712 | 10 | V     | 18 | 1864.0902 | 932.5488  |
| 1155.6673 | 578.3373  | 385.8940 | 11 | V     | 17 | 1765.0218 | 883.0145  |
| 1252.7201 | 626.8637  | 418.2449 | 12 | P     | 16 | 1665.9534 | 833.4803  |
| 1339.7521 | 670.3797  | 447.2556 | 13 | S     | 15 | 1568.9006 | 784.9540  |
| 1410.7892 | 705.8983  | 470.9346 | 14 | A     | 14 | 1481.8686 | 741.4379  |
| 1497.8213 | 749.4143  | 499.9453 | 15 | S     | 13 | 1410.8315 | 705.9194  |
| 1584.8533 | 792.9303  | 528.9559 | 16 | S     | 12 | 1323.7995 | 662.4034  |
| 1697.9374 | 849.4723  | 566.6506 | 17 | L     | 11 | 1236.7674 | 618.8874  |
| 1797.0058 | 899.0065  | 599.6734 | 18 | V     | 10 | 1123.6834 | 562.3453  |
| 1910.0898 | 955.5486  | 637.3681 | 19 | I     | 9  | 1024.6150 | 512.8111  |
| 2011.1375 | 1006.0724 | 671.0507 | 20 | T     | 8  | 911.5309  | 456.2691  |
| 2082.1746 | 1041.5910 | 694.7297 | 21 | A     | 7  | 810.4832  | 405.7452  |
| 2195.2587 | 1098.1330 | 732.4244 | 22 | L     | 6  | 739.4461  | 370.2267  |
| 2323.3537 | 1162.1805 | 775.1227 | 23 | K     | 5  | 626.3620  | 313.6847  |
| 2452.3962 | 1226.7018 | 818.1369 | 24 | E     | 4  | 498.2671  | 249.6372  |
| 2549.4490 | 1275.2281 | 850.4879 | 25 | P     | 3  | 369.2245  | 185.1159  |
| 2646.5018 | 1323.7545 | 882.8388 | 26 | P     | 2  | 272.1717  | 136.5895  |
|           |           |          | 27 | R     | 1  | 175.1190  | 88.0631   |

[\[Click\]](#) to move table  
 Static Modifications:  
 C: 57.02146  
 M: 3.0189  
 Variable Modifications:  
 R: 17.0346

# Rpl12ab

K.IQNmono**R**QAAASVVPSASSLVITALKEPPR.D [63, 89] (missed 2)

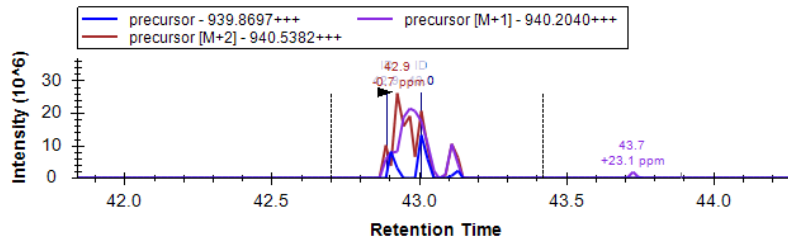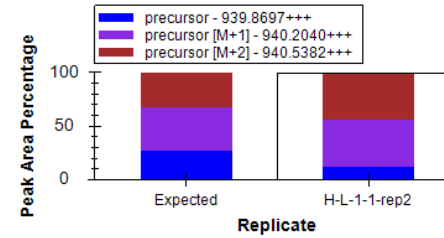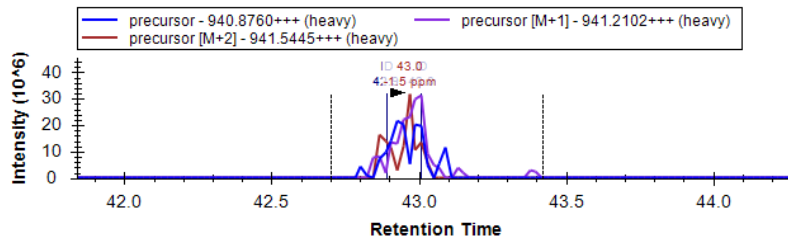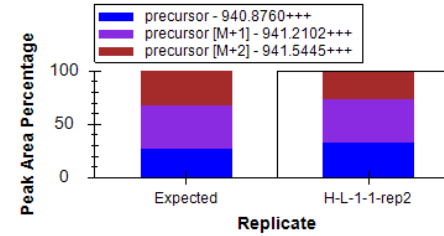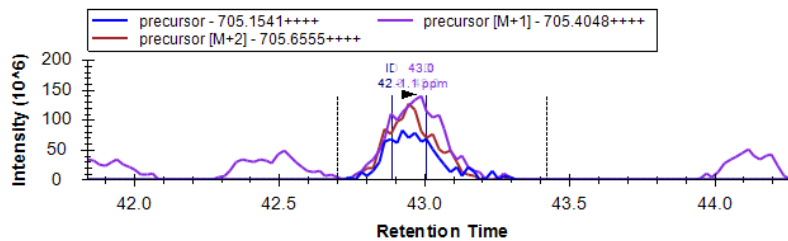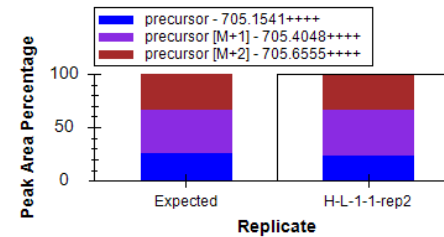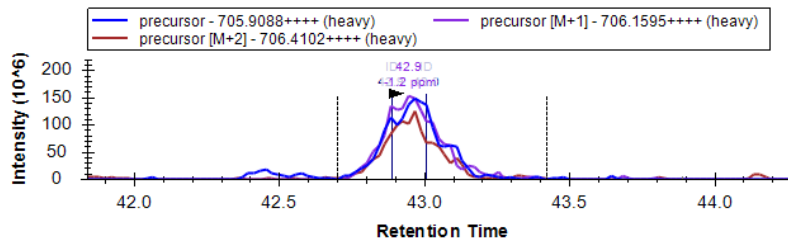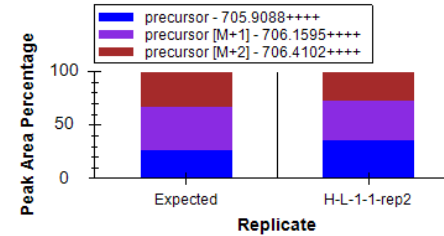

Replicate 2

# Rpl12ab

K.IQNmono**R**QAAASVVPSASSLVITALKEPPR.D [63, 89] (missed 2)

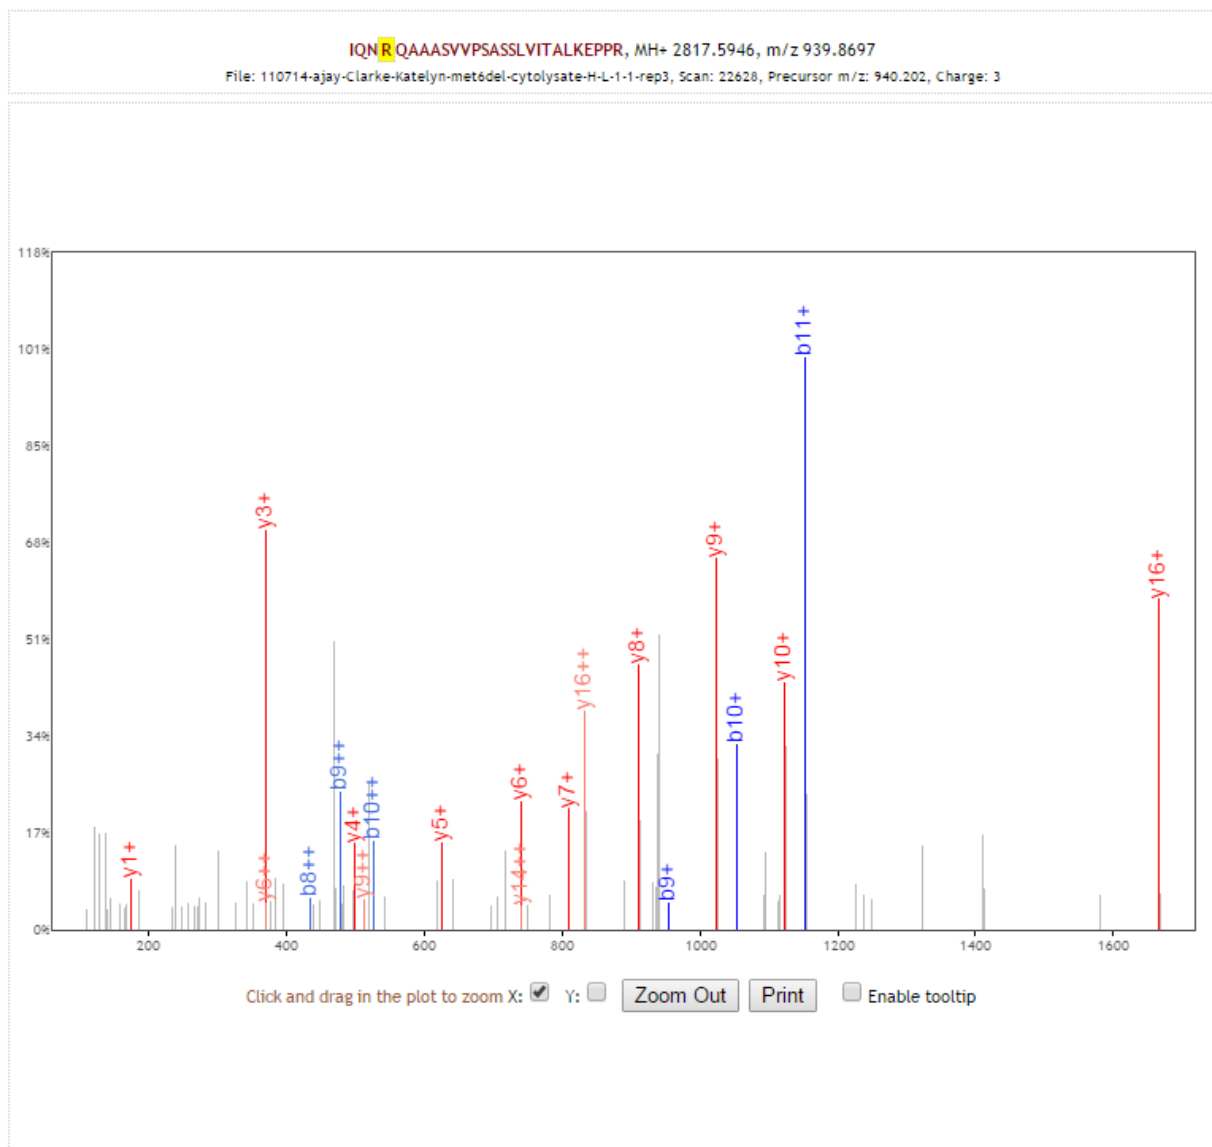

| b+        | b2+       | #  | Seq # | y+        | y2+       |
|-----------|-----------|----|-------|-----------|-----------|
| 114.0913  | 57.5493   | 1  | I 27  |           |           |
| 242.1499  | 121.5786  | 2  | Q 26  | 2704.5105 | 1352.7589 |
| 356.1928  | 178.6001  | 3  | N 25  | 2576.4519 | 1288.7296 |
| 526.3097  | 263.6585  | 4  | R 24  | 2462.4090 | 1231.7081 |
| 654.3682  | 327.6878  | 5  | Q 23  | 2292.2922 | 1146.6497 |
| 725.4053  | 363.2063  | 6  | A 22  | 2164.2336 | 1082.6204 |
| 796.4425  | 398.7249  | 7  | A 21  | 2093.1965 | 1047.1019 |
| 867.4796  | 434.2434  | 8  | A 20  | 2022.1594 | 1011.5833 |
| 954.5116  | 477.7594  | 9  | S 19  | 1951.1223 | 976.0648  |
| 1053.5800 | 527.2936  | 10 | V 18  | 1864.0902 | 932.5488  |
| 1152.6484 | 576.8279  | 11 | V 17  | 1765.0218 | 883.0145  |
| 1249.7012 | 625.3542  | 12 | P 16  | 1665.9534 | 833.4803  |
| 1336.7332 | 668.8702  | 13 | S 15  | 1568.9006 | 784.9540  |
| 1407.7703 | 704.3888  | 14 | A 14  | 1481.8686 | 741.4379  |
| 1494.8024 | 747.9048  | 15 | S 13  | 1410.8315 | 705.9194  |
| 1581.8344 | 791.4208  | 16 | S 12  | 1323.7995 | 662.4034  |
| 1694.9185 | 847.9629  | 17 | L 11  | 1236.7674 | 618.8874  |
| 1793.9869 | 897.4971  | 18 | V 10  | 1123.6834 | 562.3453  |
| 1907.0709 | 954.0391  | 19 | I 9   | 1024.6150 | 512.8111  |
| 2008.1186 | 1004.5629 | 20 | T 8   | 911.5309  | 456.2691  |
| 2079.1557 | 1040.0815 | 21 | A 7   | 810.4832  | 405.7452  |
| 2192.2398 | 1096.6235 | 22 | L 6   | 739.4461  | 370.2267  |
| 2320.3348 | 1160.6710 | 23 | K 5   | 626.3620  | 313.6847  |
| 2449.3773 | 1225.1923 | 24 | E 4   | 498.2671  | 249.6372  |
| 2546.4301 | 1273.7187 | 25 | P 3   | 369.2245  | 185.1159  |
| 2643.4829 | 1322.2451 | 26 | P 2   | 272.1717  | 136.5895  |
|           |           | 27 | R 1   | 175.1190  | 88.0631   |

[\[Click\]](#) to move table  
 Static Modifications:  
 C: 57.02146  
 Variable Modifications:  
 R: 14.0157

# Rpl12ab

K.IQNmono**R**QAAASVVPSASSLVITALKEPPR.D [63, 89] (missed 2)

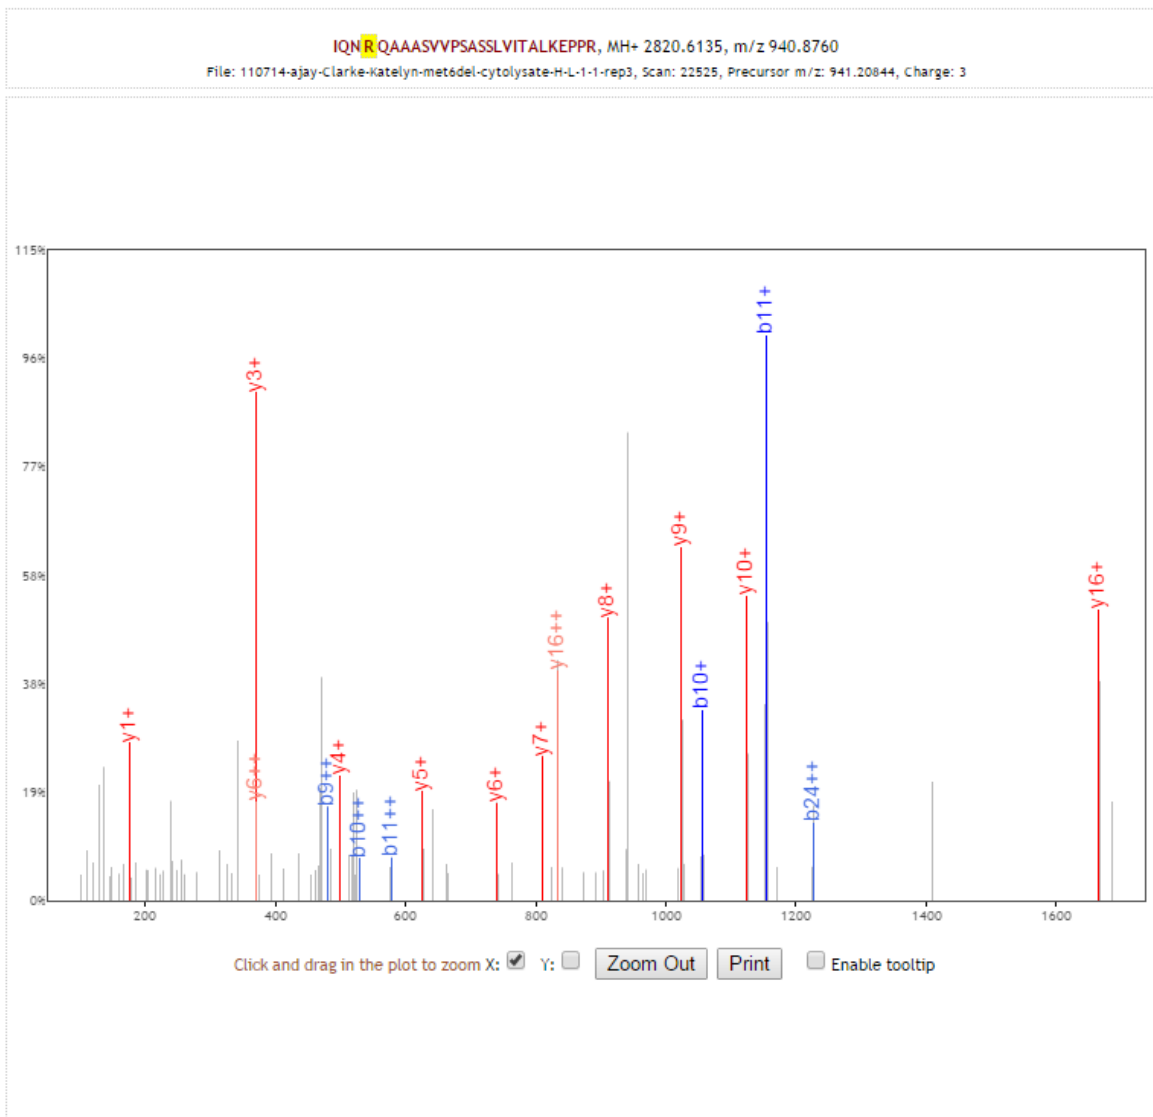

| b+        | b2+       | #  | Seq      | #  | y+        | y2+       |
|-----------|-----------|----|----------|----|-----------|-----------|
| 114.0913  | 57.5493   | 1  | I        | 27 |           |           |
| 242.1499  | 121.5786  | 2  | Q        | 26 | 2707.5294 | 1354.2683 |
| 356.1928  | 178.6001  | 3  | N        | 25 | 2579.4708 | 1290.2390 |
| 529.3286  | 265.1679  | 4  | <b>R</b> | 24 | 2465.4279 | 1233.2176 |
| 657.3871  | 329.1972  | 5  | Q        | 23 | 2292.2922 | 1146.6497 |
| 728.4242  | 364.7158  | 6  | A        | 22 | 2164.2336 | 1082.6204 |
| 799.4614  | 400.2343  | 7  | A        | 21 | 2093.1965 | 1047.1019 |
| 870.4985  | 435.7529  | 8  | A        | 20 | 2022.1594 | 1011.5833 |
| 957.5305  | 479.2689  | 9  | S        | 19 | 1951.1223 | 976.0648  |
| 1056.5989 | 528.8031  | 10 | V        | 18 | 1864.0902 | 932.5488  |
| 1155.6673 | 578.3373  | 11 | V        | 17 | 1765.0218 | 883.0145  |
| 1252.7201 | 626.8637  | 12 | P        | 16 | 1665.9534 | 833.4803  |
| 1339.7521 | 670.3797  | 13 | S        | 15 | 1568.9006 | 784.9540  |
| 1410.7892 | 705.8983  | 14 | A        | 14 | 1481.8686 | 741.4379  |
| 1497.8213 | 749.4143  | 15 | S        | 13 | 1410.8315 | 705.9194  |
| 1584.8533 | 792.9303  | 16 | S        | 12 | 1323.7995 | 662.4034  |
| 1697.9374 | 849.4723  | 17 | L        | 11 | 1236.7674 | 618.8874  |
| 1797.0058 | 899.0065  | 18 | V        | 10 | 1123.6834 | 562.3453  |
| 1910.0898 | 955.5486  | 19 | I        | 9  | 1024.6150 | 512.8111  |
| 2011.1375 | 1006.0724 | 20 | T        | 8  | 911.5309  | 456.2691  |
| 2082.1746 | 1041.5910 | 21 | A        | 7  | 810.4832  | 405.7452  |
| 2195.2587 | 1098.1330 | 22 | L        | 6  | 739.4461  | 370.2267  |
| 2323.3537 | 1162.1805 | 23 | K        | 5  | 626.3620  | 313.6847  |
| 2452.3962 | 1226.7018 | 24 | E        | 4  | 498.2671  | 249.6372  |
| 2549.4490 | 1275.2281 | 25 | P        | 3  | 369.2245  | 185.1159  |
| 2646.5018 | 1323.7545 | 26 | P        | 2  | 272.1717  | 136.5895  |
|           |           | 27 | R        | 1  | 175.1190  | 88.0631   |

[\[click\]](#) to move table

Static Modifications:  
C: 57.02146  
M: 3.0189

Variable Modifications:  
R: 17.0346

# Rpl12ab

K.IQNmono**R**QAAASVVPSASSLVITALKEPPR.D [63, 89] (missed 2)

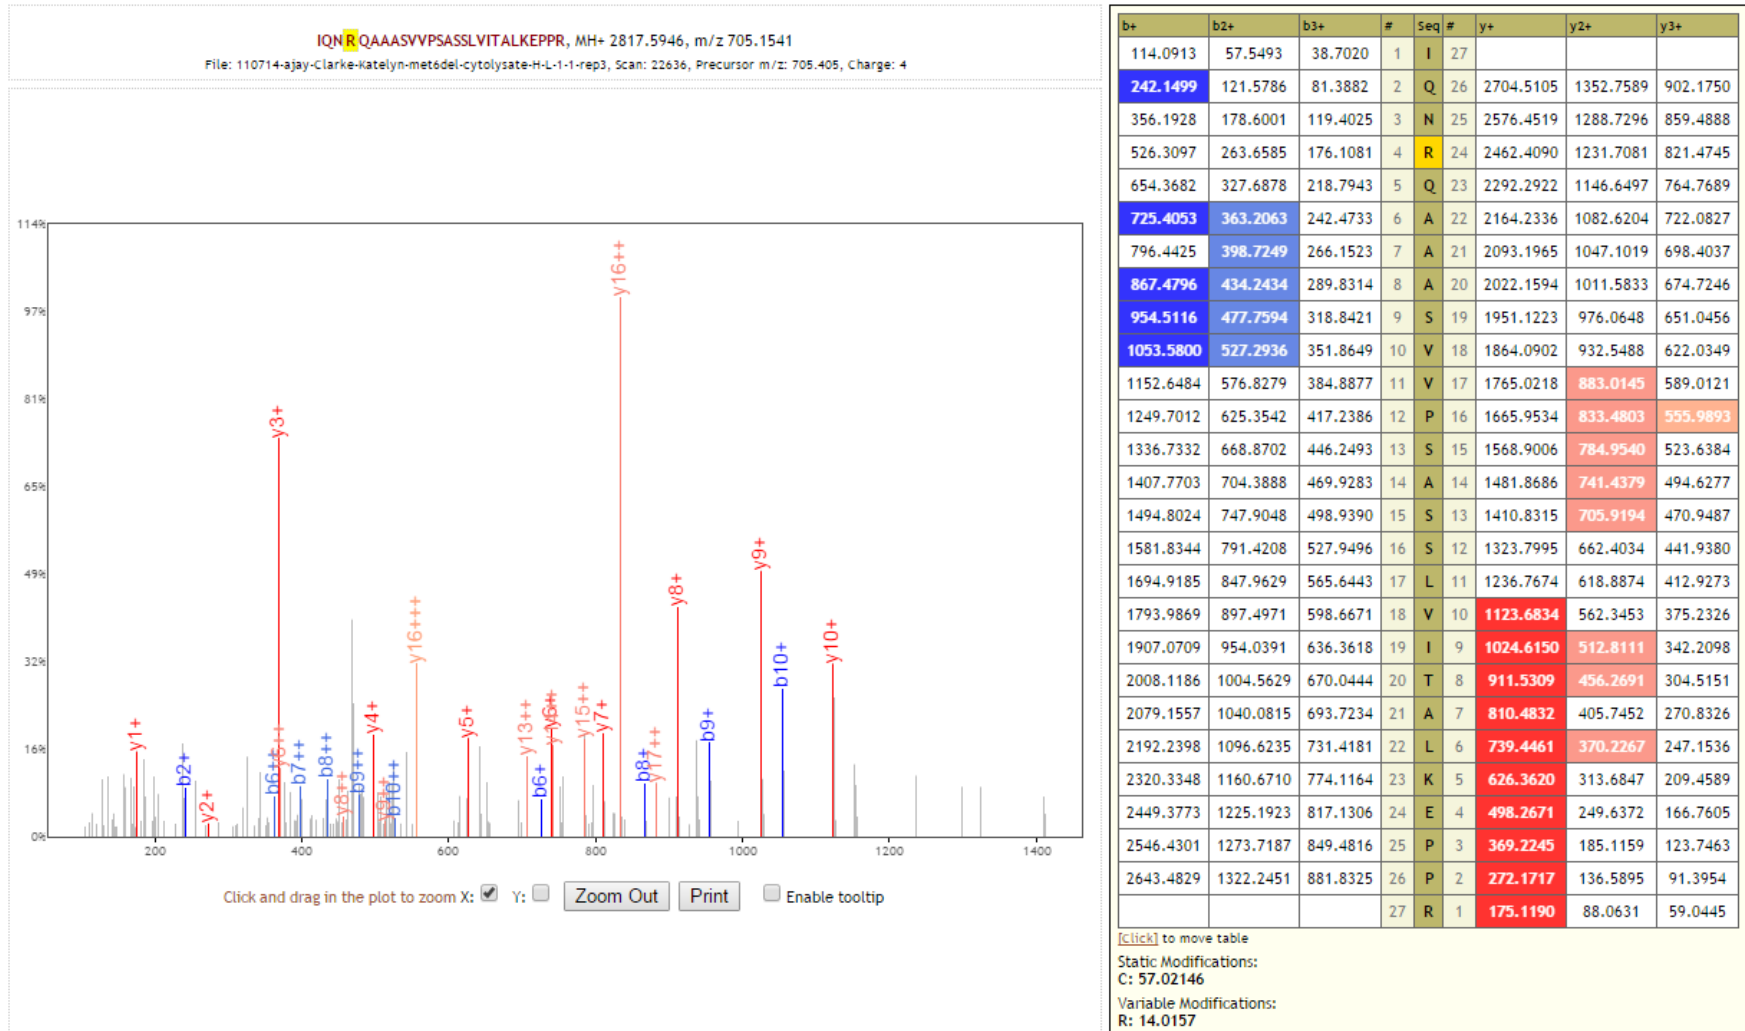

# Rpl12ab

K.IQNmono**R**QAAASVVPSASSLVITALKEPPR.D [63, 89] (missed 2)

IQN**R**QAAASVVPSASSLVITALKEPPR, MH+ 2820.6135, m/z 705.9088

File: 110714-ajay-Clarke-Katlyn-metódel-cytolysate-H-L-1-1-rep3, Scan: 22634, Precursor m/z: 706.1599, Charge: 4

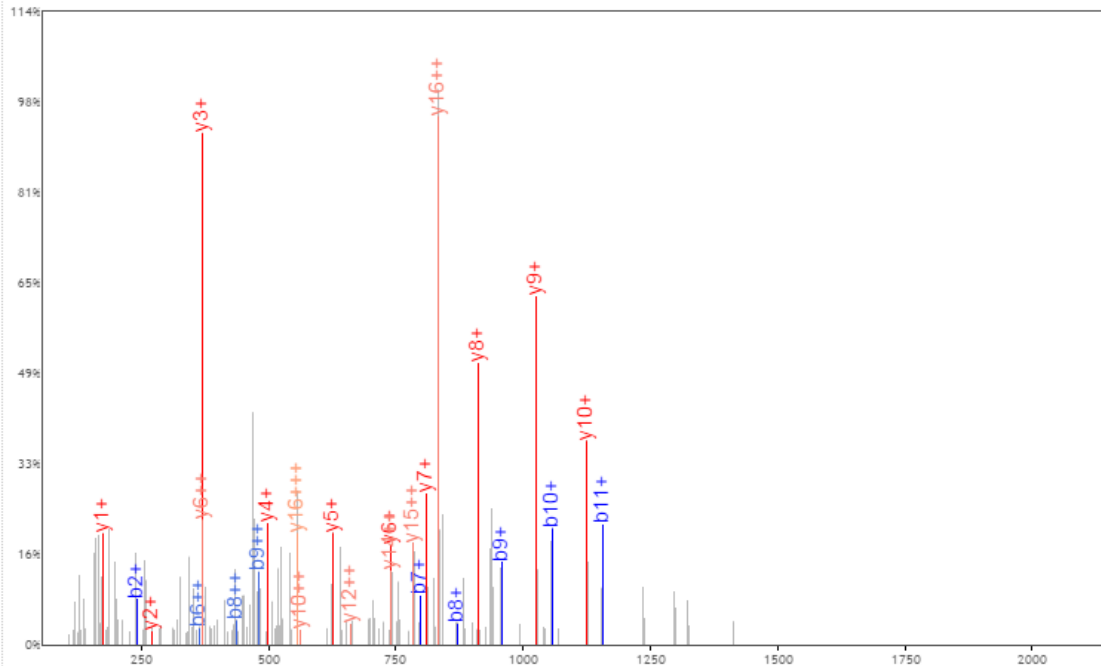

Click and drag in the plot to zoom X:  Y:     Enable tooltip

| b+        | b2+       | b3+      | #  | Seq # | y+        | y2+       | y3+      |
|-----------|-----------|----------|----|-------|-----------|-----------|----------|
| 114.0913  | 57.5493   | 38.7020  | 1  | I 27  |           |           |          |
| 242.1499  | 121.5786  | 81.3882  | 2  | Q 26  | 2707.5294 | 1354.2683 | 903.1813 |
| 356.1928  | 178.6001  | 119.4025 | 3  | N 25  | 2579.4708 | 1290.2390 | 860.4951 |
| 529.3286  | 265.1679  | 177.1144 | 4  | R 24  | 2465.4279 | 1233.2176 | 822.4808 |
| 657.3871  | 329.1972  | 219.8006 | 5  | Q 23  | 2292.2922 | 1146.6497 | 764.7689 |
| 728.4242  | 364.7158  | 243.4796 | 6  | A 22  | 2164.2336 | 1082.6204 | 722.0827 |
| 799.4614  | 400.2343  | 267.1586 | 7  | A 21  | 2093.1965 | 1047.1019 | 698.4037 |
| 870.4985  | 435.7529  | 290.8377 | 8  | A 20  | 2022.1594 | 1011.5833 | 674.7246 |
| 957.5305  | 479.2689  | 319.8484 | 9  | S 19  | 1951.1223 | 976.0648  | 651.0456 |
| 1056.5989 | 528.8031  | 352.8712 | 10 | V 18  | 1864.0902 | 932.5488  | 622.0349 |
| 1155.6673 | 578.3373  | 385.8940 | 11 | V 17  | 1765.0218 | 883.0145  | 589.0121 |
| 1252.7201 | 626.8637  | 418.2449 | 12 | P 16  | 1665.9534 | 833.4803  | 555.9893 |
| 1339.7521 | 670.3797  | 447.2556 | 13 | S 15  | 1568.9006 | 784.9540  | 523.6384 |
| 1410.7892 | 705.8983  | 470.9346 | 14 | A 14  | 1481.8686 | 741.4379  | 494.6277 |
| 1497.8213 | 749.4143  | 499.9453 | 15 | S 13  | 1410.8315 | 705.9194  | 470.9487 |
| 1584.8533 | 792.9303  | 528.9559 | 16 | S 12  | 1323.7995 | 662.4034  | 441.9380 |
| 1697.9374 | 849.4723  | 566.6506 | 17 | L 11  | 1236.7674 | 618.8874  | 412.9273 |
| 1797.0058 | 899.0065  | 599.6734 | 18 | V 10  | 1123.6834 | 562.3453  | 375.2326 |
| 1910.0898 | 955.5486  | 637.3681 | 19 | I 9   | 1024.6150 | 512.8111  | 342.2098 |
| 2011.1375 | 1006.0724 | 671.0507 | 20 | T 8   | 911.5309  | 456.2691  | 304.5151 |
| 2082.1746 | 1041.5910 | 694.7297 | 21 | A 7   | 810.4832  | 405.7452  | 270.8326 |
| 2195.2587 | 1098.1330 | 732.4244 | 22 | L 6   | 739.4461  | 370.2267  | 247.1536 |
| 2323.3537 | 1162.1805 | 775.1227 | 23 | K 5   | 626.3620  | 313.6847  | 209.4589 |
| 2452.3962 | 1226.7018 | 818.1369 | 24 | E 4   | 498.2671  | 249.6372  | 166.7605 |
| 2549.4490 | 1275.2281 | 850.4879 | 25 | P 3   | 369.2245  | 185.1159  | 123.7463 |
| 2646.5018 | 1323.7545 | 882.8388 | 26 | P 2   | 272.1717  | 136.5895  | 91.3954  |
|           |           |          | 27 | R 1   | 175.1190  | 88.0631   | 59.0445  |

[Click] to move table

Static Modifications:

C: 57.02146

M: 3.0189

Variable Modifications:

R: 17.0346

Replicate 2

# Rpl12ab

K.IQNmono**R**QAAASVVPSASSLVITALKEPPR.D [63, 89] (missed 2)

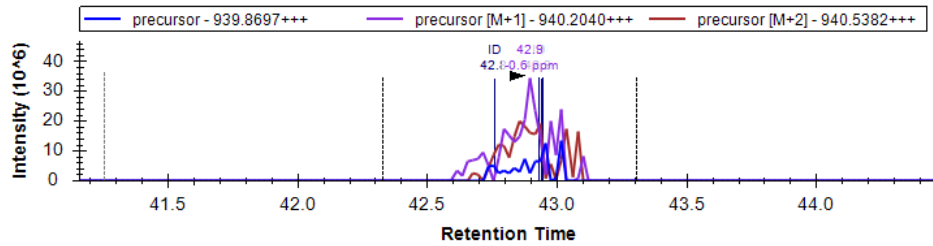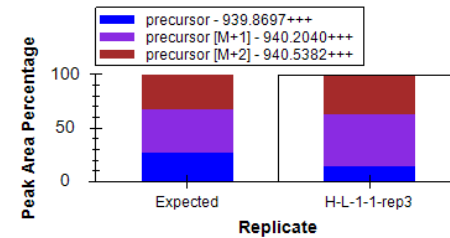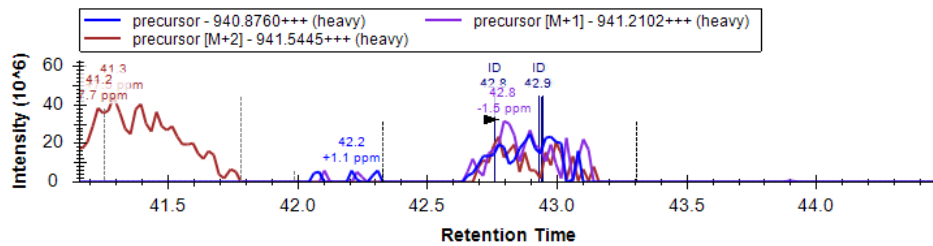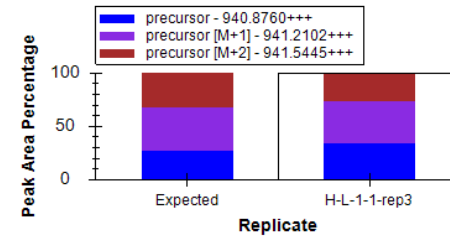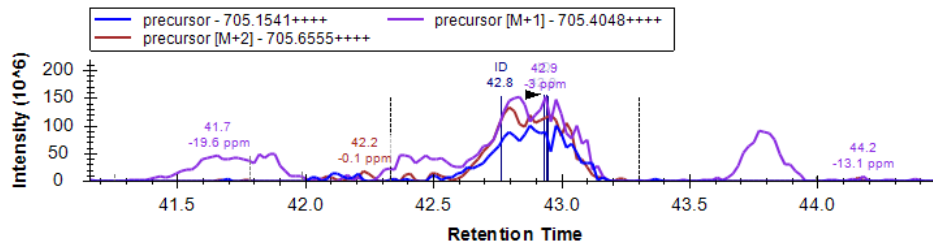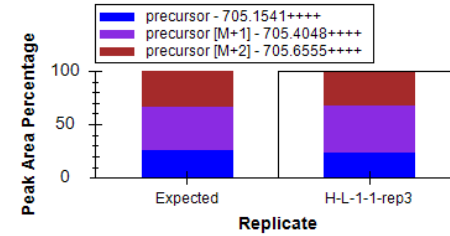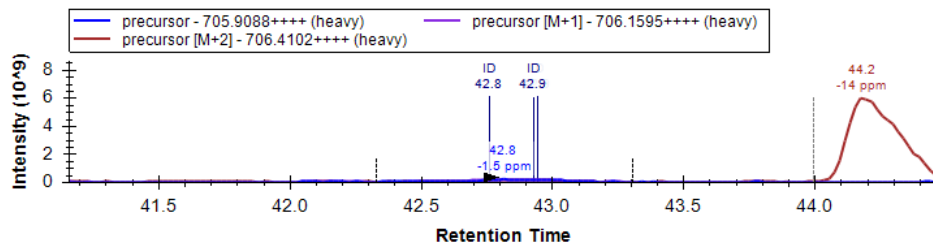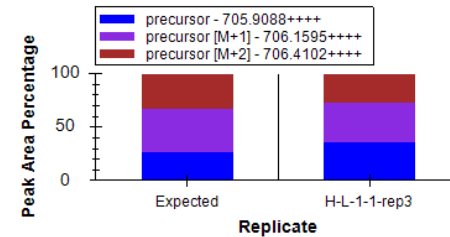

Replicate 3



# Rpl12ab

K.IQNmono**R**QAAASVVPSASSLVITALKEPPR.D [63, 89] (missed 2)

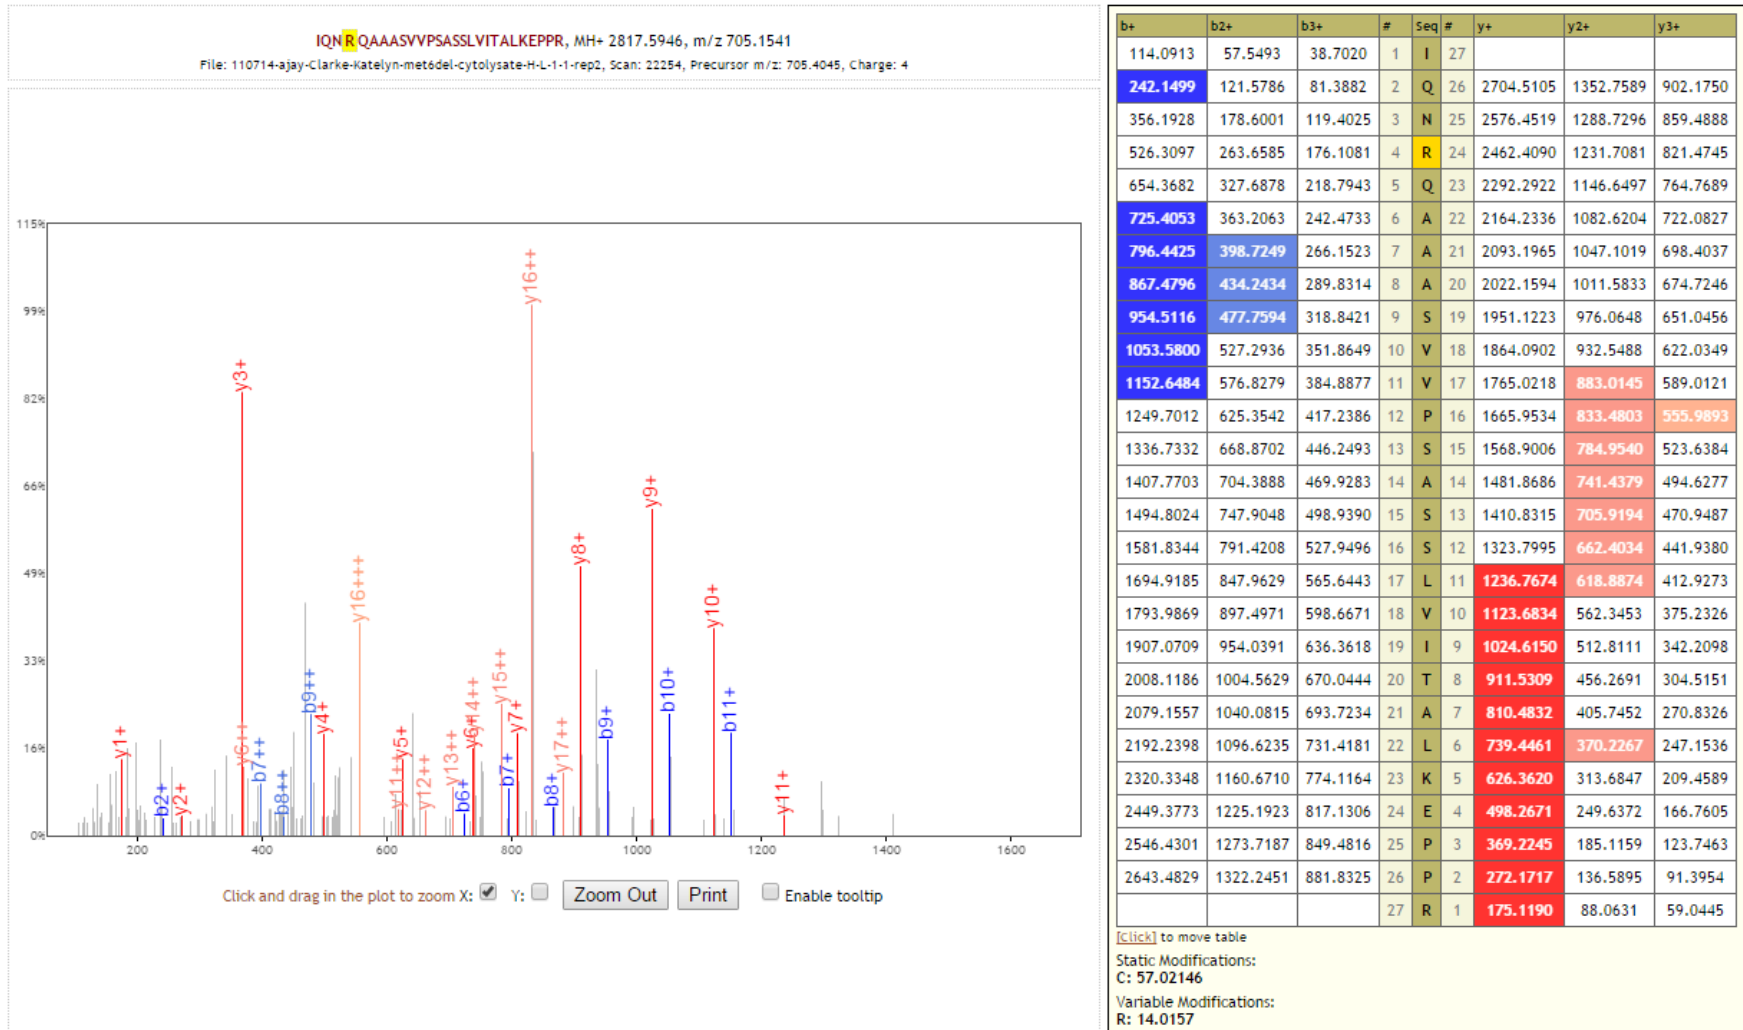

# Rpl12ab

K.IQNmono**R**QAAASVVPSASSLVITALKEPPR.D [63, 89] (missed 2)

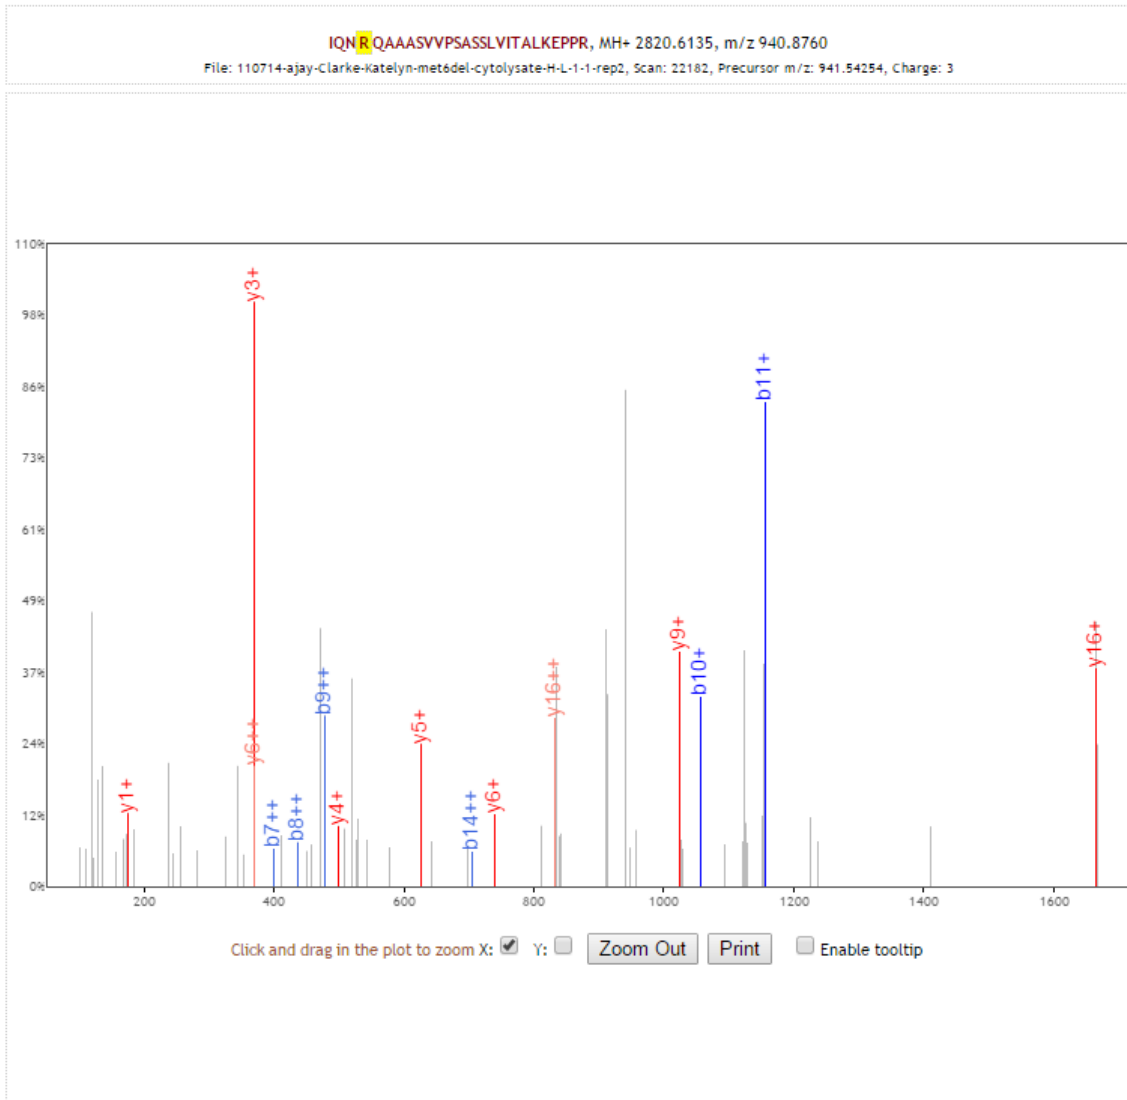

| b+        | b2+       | #  | Seq # | y+        | y2+       |
|-----------|-----------|----|-------|-----------|-----------|
| 114.0913  | 57.5493   | 1  | I 27  |           |           |
| 242.1499  | 121.5786  | 2  | Q 26  | 2707.5294 | 1354.2683 |
| 356.1928  | 178.6001  | 3  | N 25  | 2579.4708 | 1290.2390 |
| 529.3286  | 265.1679  | 4  | R 24  | 2465.4279 | 1233.2176 |
| 657.3871  | 329.1972  | 5  | Q 23  | 2292.2922 | 1146.6497 |
| 728.4242  | 364.7158  | 6  | A 22  | 2164.2336 | 1082.6204 |
| 799.4614  | 400.2343  | 7  | A 21  | 2093.1965 | 1047.1019 |
| 870.4985  | 435.7529  | 8  | A 20  | 2022.1594 | 1011.5833 |
| 957.5305  | 479.2689  | 9  | S 19  | 1951.1223 | 976.0648  |
| 1056.5989 | 528.8031  | 10 | V 18  | 1864.0902 | 932.5488  |
| 1155.6673 | 578.3373  | 11 | V 17  | 1765.0218 | 883.0145  |
| 1252.7201 | 626.8637  | 12 | P 16  | 1665.9534 | 833.4803  |
| 1339.7521 | 670.3797  | 13 | S 15  | 1568.9006 | 784.9540  |
| 1410.7892 | 705.8983  | 14 | A 14  | 1481.8686 | 741.4379  |
| 1497.8213 | 749.4143  | 15 | S 13  | 1410.8315 | 705.9194  |
| 1584.8533 | 792.9303  | 16 | S 12  | 1323.7995 | 662.4034  |
| 1697.9374 | 849.4723  | 17 | L 11  | 1236.7674 | 618.8874  |
| 1797.0058 | 899.0065  | 18 | V 10  | 1123.6834 | 562.3453  |
| 1910.0898 | 955.5486  | 19 | I 9   | 1024.6150 | 512.8111  |
| 2011.1375 | 1006.0724 | 20 | T 8   | 911.5309  | 456.2691  |
| 2082.1746 | 1041.5910 | 21 | A 7   | 810.4832  | 405.7452  |
| 2195.2587 | 1098.1330 | 22 | L 6   | 739.4461  | 370.2267  |
| 2323.3537 | 1162.1805 | 23 | K 5   | 626.3620  | 313.6847  |
| 2452.3962 | 1226.7018 | 24 | E 4   | 498.2671  | 249.6372  |
| 2549.4490 | 1275.2281 | 25 | P 3   | 369.2245  | 185.1159  |
| 2646.5018 | 1323.7545 | 26 | P 2   | 272.1717  | 136.5895  |
|           |           | 27 | R 1   | 175.1190  | 88.0631   |

[\[Click\]](#) to move table

Static Modifications:  
 C: 57.02146  
 M: 3.0189

Variable Modifications:  
 R: 17.0346

# Rpl42ab

## R.KQSGFGGQTmono**K**PVFHK.K [45, 59] (missed 1)

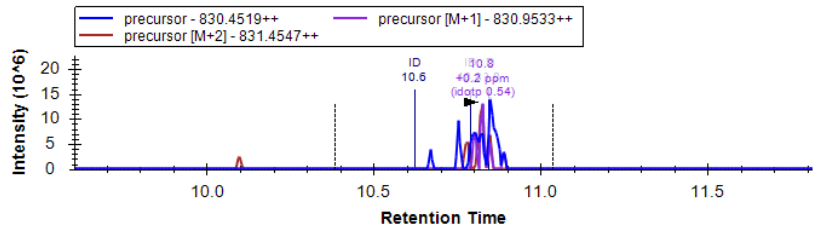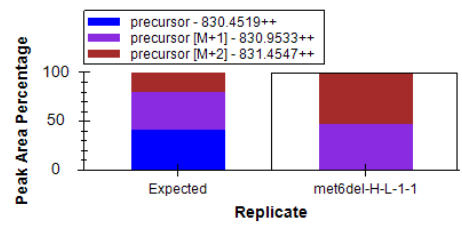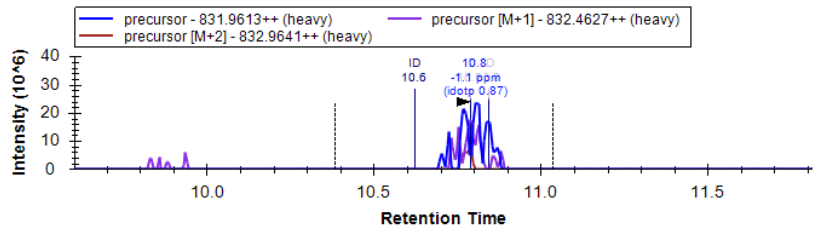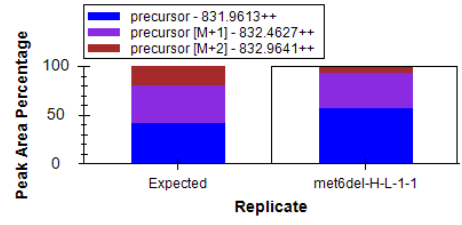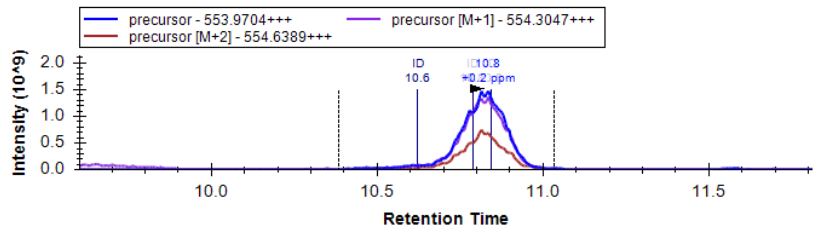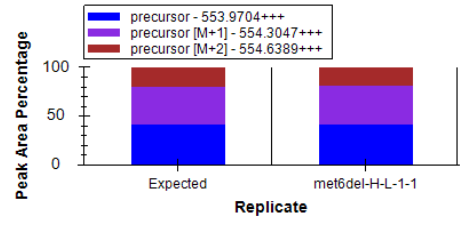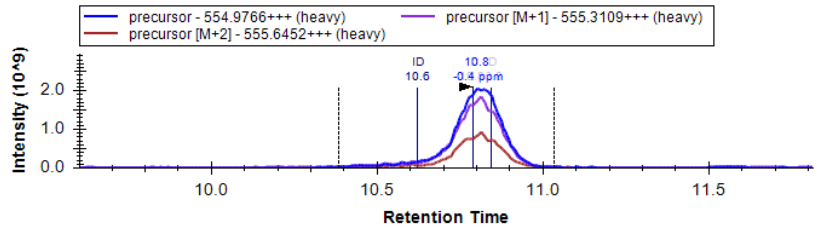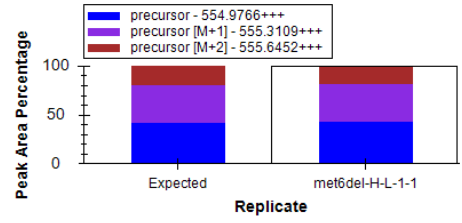

# Rpl42ab

R.KQSGFGGQTmono**K**PVFHK.K [45, 59] (missed 1)

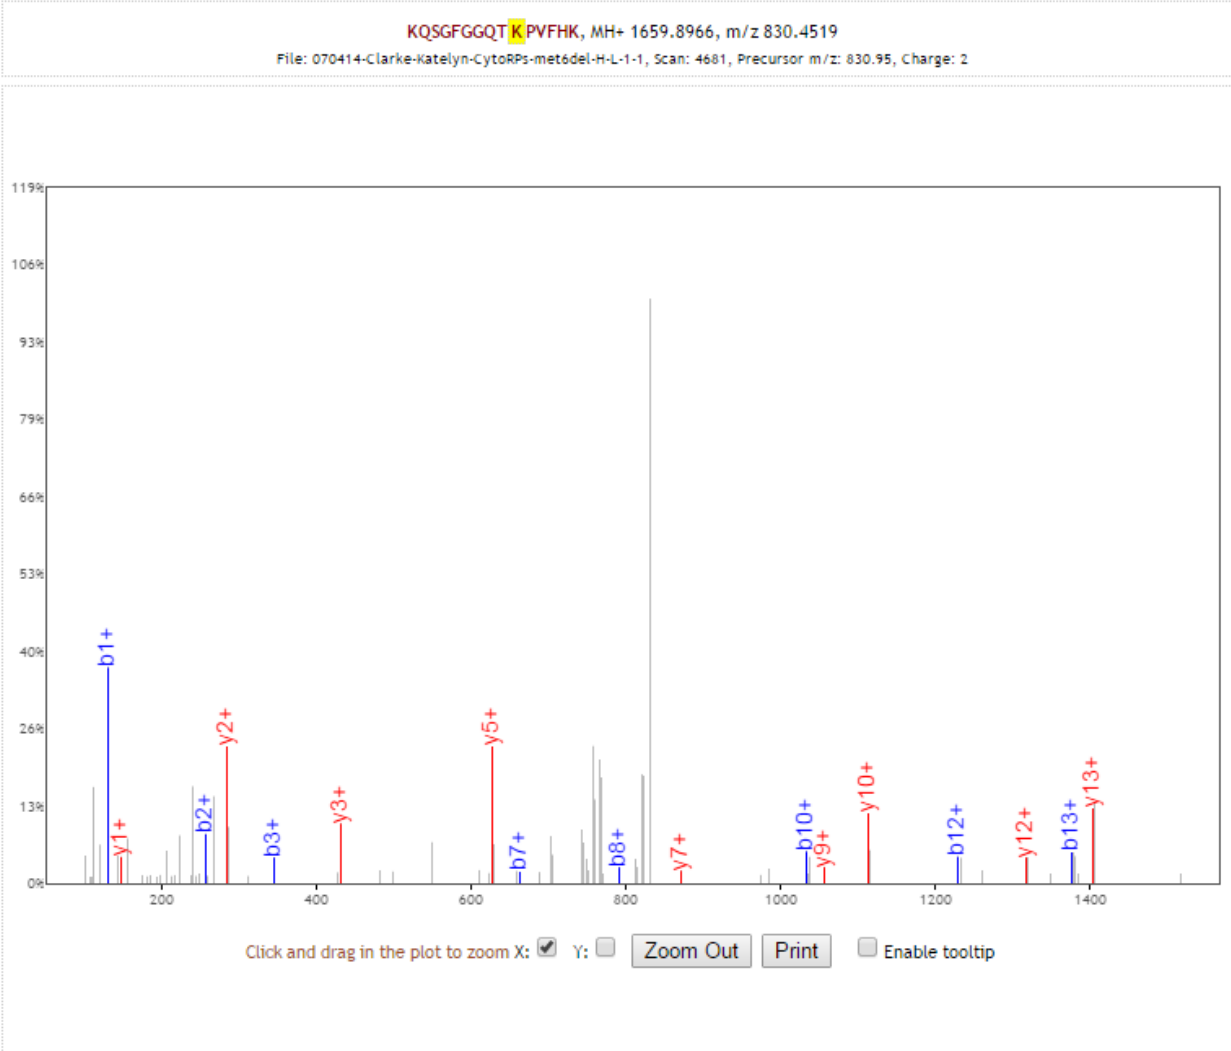

| b+        | #  | Seq #    | y+ |
|-----------|----|----------|----|
| 129.1022  | 1  | K        | 15 |
| 257.1608  | 2  | Q        | 14 |
| 344.1928  | 3  | S        | 13 |
| 401.2143  | 4  | G        | 12 |
| 548.2827  | 5  | F        | 11 |
| 605.3042  | 6  | G        | 10 |
| 662.3257  | 7  | G        | 9  |
| 790.3842  | 8  | Q        | 8  |
| 891.4319  | 9  | T        | 7  |
| 1033.5426 | 10 | <b>K</b> | 6  |
| 1130.5953 | 11 | P        | 5  |
| 1229.6637 | 12 | V        | 4  |
| 1376.7322 | 13 | F        | 3  |
| 1513.7911 | 14 | H        | 2  |
|           | 15 | K        | 1  |

[\[Click\]](#) to move table

Static Modifications:  
C: 57.02146

Variable Modifications:  
K: 14.0157

# Rpl42ab

## R.KQSGFGGQTmono**K**PVFHK.K [45, 59] (missed 1)

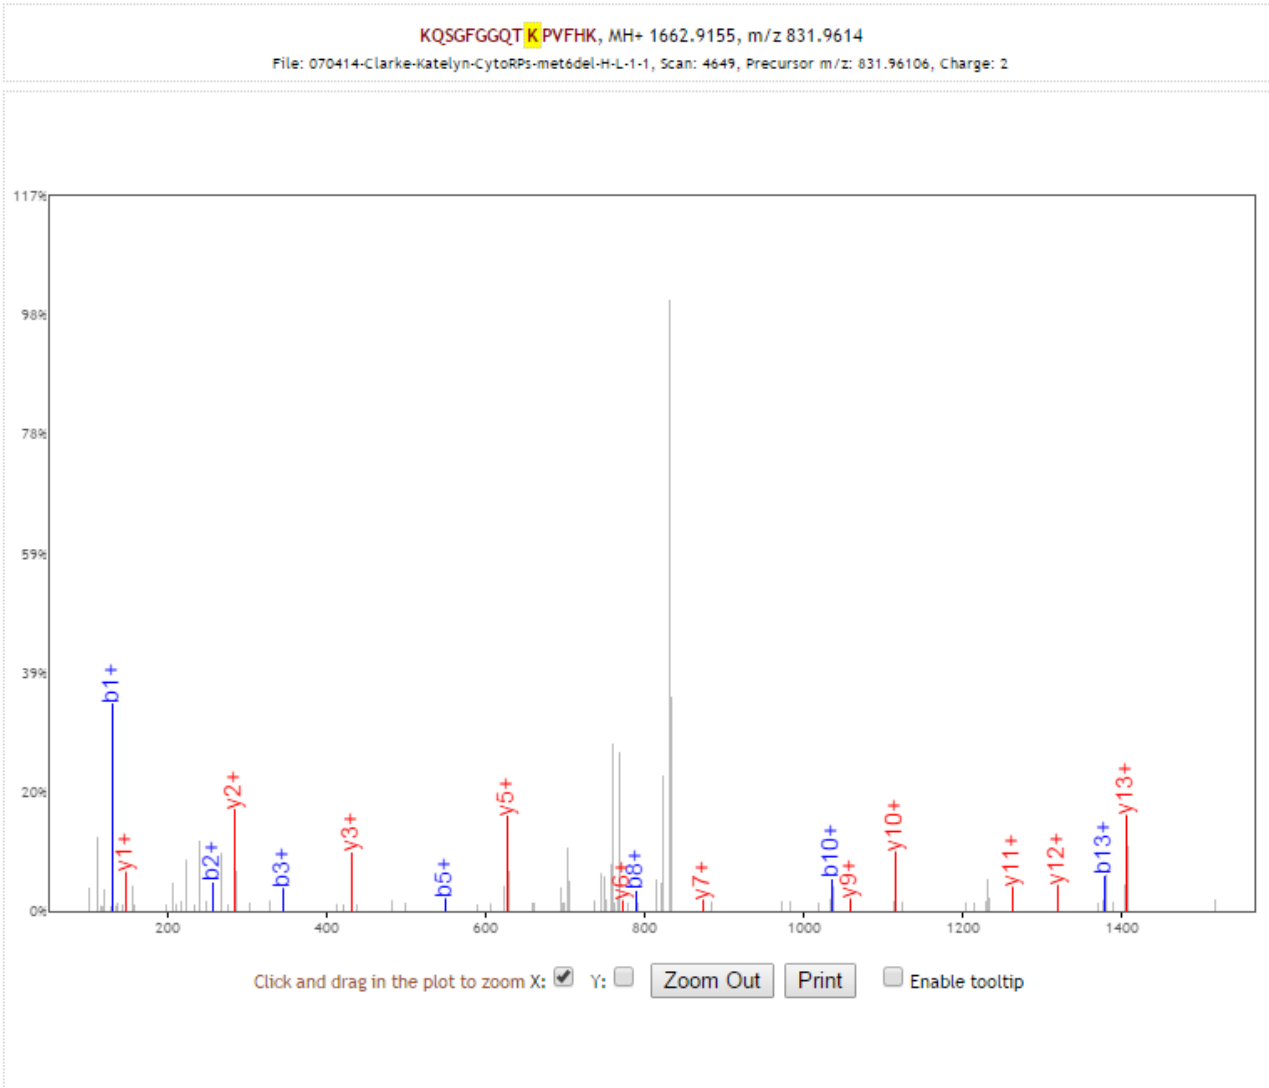

| b+        | #  | Seq #    | y+ |
|-----------|----|----------|----|
| 129.1022  | 1  | K        | 15 |
| 257.1608  | 2  | Q        | 14 |
| 344.1928  | 3  | S        | 13 |
| 401.2143  | 4  | G        | 12 |
| 548.2827  | 5  | F        | 11 |
| 605.3042  | 6  | G        | 10 |
| 662.3257  | 7  | G        | 9  |
| 790.3842  | 8  | Q        | 8  |
| 891.4319  | 9  | T        | 7  |
| 1036.5615 | 10 | <b>K</b> | 6  |
| 1133.6142 | 11 | P        | 5  |
| 1232.6826 | 12 | V        | 4  |
| 1379.7511 | 13 | F        | 3  |
| 1516.8100 | 14 | H        | 2  |
|           | 15 | K        | 1  |

[\[click\]](#) to move table

Static Modifications:  
 C: 57.02146  
 M: 3.0189

Variable Modifications:  
 K: 17.0346

# Rpl42ab

## R.KQSGFGGQTmono**K**PVFHK.K [45, 59] (missed 1)

KQSGFGGQT**K**PVFHK, MH+ 1662.9155, m/z 554.9767  
 File: 070414-Clarke-Katelyn-CytoRPs-met6del-H-L-1-1, Scan: 4574, Precursor m/z: 555.31055, Charge: 3

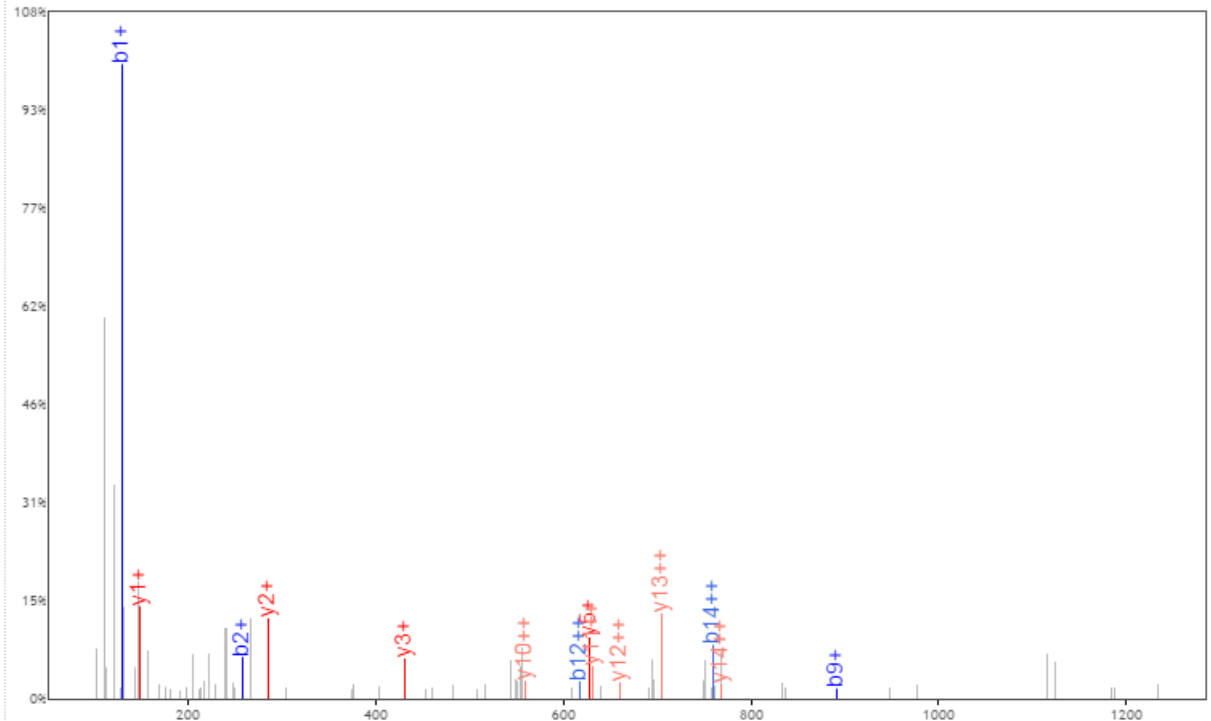

Click and drag in the plot to zoom X:  Y:     Enable tooltip

| b+        | b2+      | #  | Seq | #  | y+        | y2+      |
|-----------|----------|----|-----|----|-----------|----------|
| 129.1022  | 65.0548  | 1  | K   | 15 |           |          |
| 257.1608  | 129.0840 | 2  | Q   | 14 | 1534.8205 | 767.9139 |
| 344.1928  | 172.6001 | 3  | S   | 13 | 1406.7620 | 703.8846 |
| 401.2143  | 201.1108 | 4  | G   | 12 | 1319.7299 | 660.3686 |
| 548.2827  | 274.6450 | 5  | F   | 11 | 1262.7085 | 631.8579 |
| 605.3042  | 303.1557 | 6  | G   | 10 | 1115.6401 | 558.3237 |
| 662.3257  | 331.6665 | 7  | G   | 9  | 1058.6186 | 529.8129 |
| 790.3842  | 395.6958 | 8  | Q   | 8  | 1001.5971 | 501.3022 |
| 891.4319  | 446.2196 | 9  | T   | 7  | 873.5385  | 437.2729 |
| 1036.5615 | 518.7844 | 10 | K   | 6  | 772.4909  | 386.7491 |
| 1133.6142 | 567.3108 | 11 | P   | 5  | 627.3613  | 314.1843 |
| 1232.6826 | 616.8450 | 12 | V   | 4  | 530.3085  | 265.6579 |
| 1379.7511 | 690.3792 | 13 | F   | 3  | 431.2401  | 216.1237 |
| 1516.8100 | 758.9086 | 14 | H   | 2  | 284.1717  | 142.5895 |
|           |          | 15 | K   | 1  | 147.1128  | 74.0600  |

[\[Click\]](#) to move table

Static Modifications:  
 C: 57.02146  
 M: 3.0189  
 Variable Modifications:  
 K: 17.0346

# Rpl42ab

## K.QSGFGGQTmono**K**PVFHK.K [46, 59]

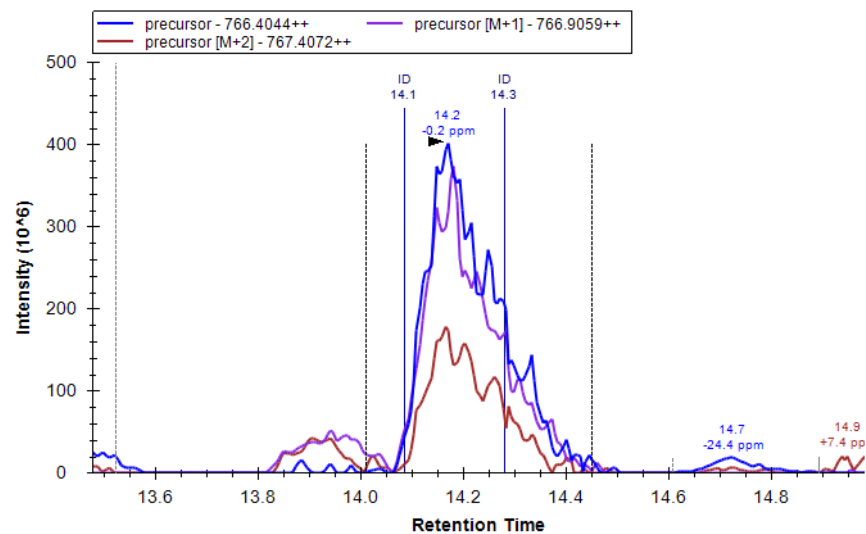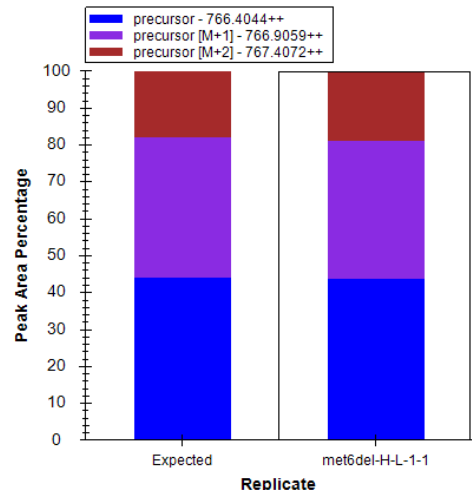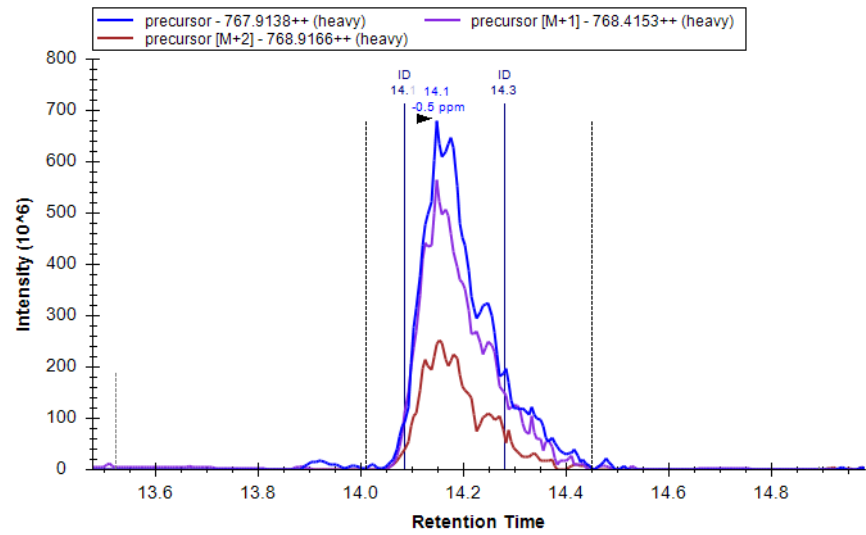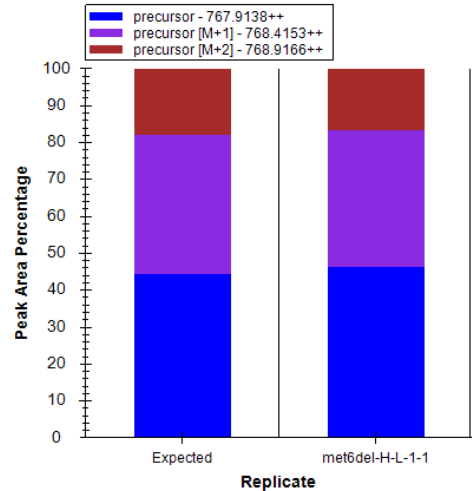

Replicate 1

# Rpl42ab

K.QSGFGGQTmono**K**PVFHK.K [46, 59]

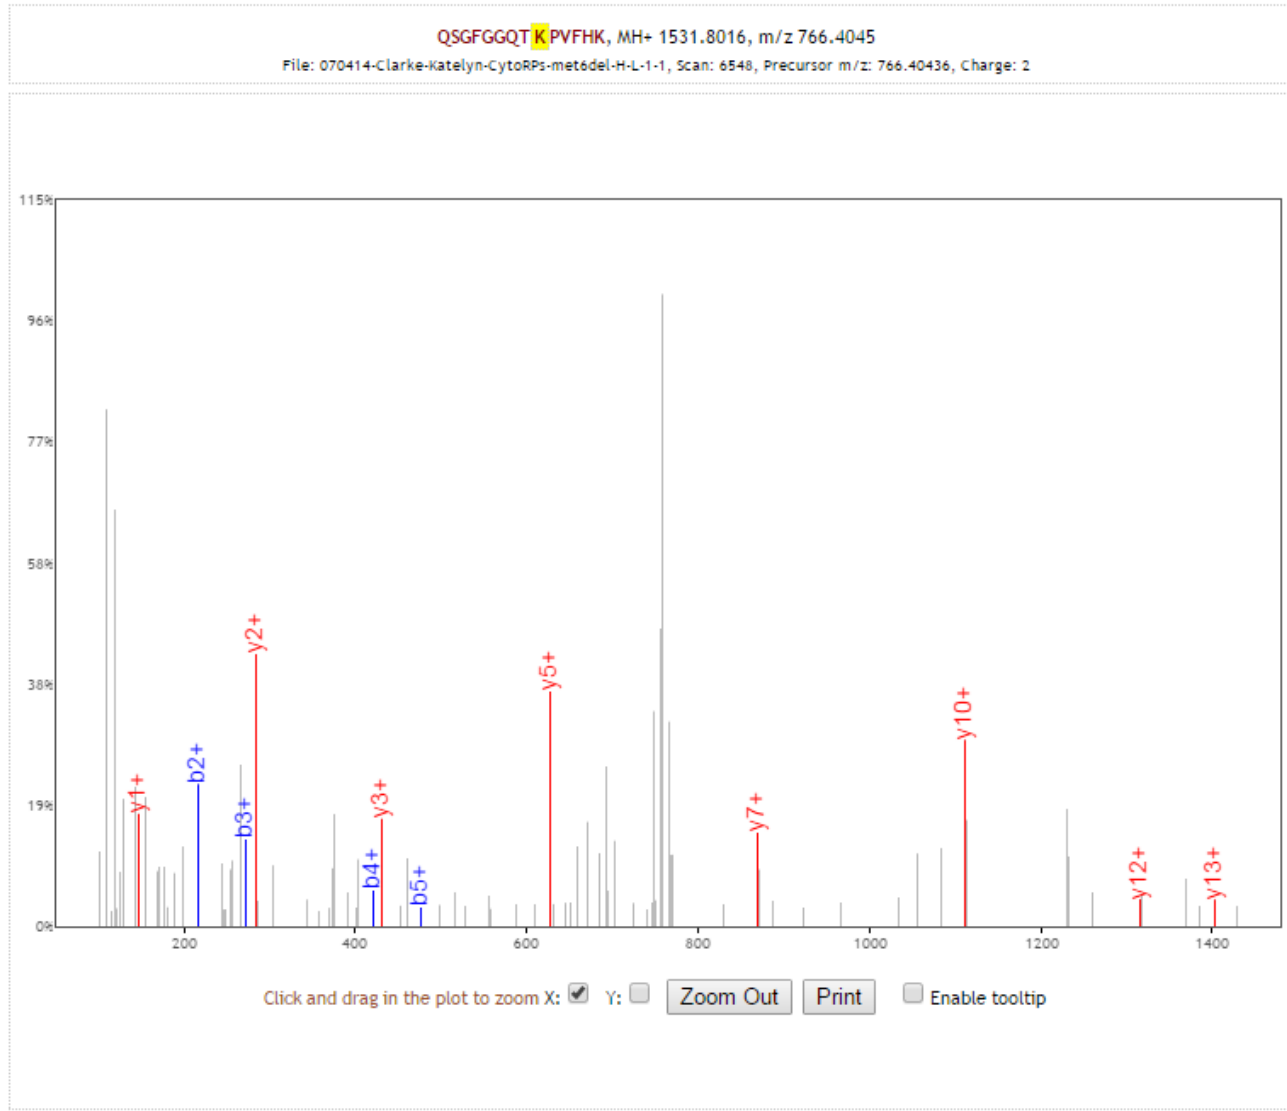

| b+        | #  | Seq #      | y+        |
|-----------|----|------------|-----------|
| 129.0659  | 1  | Q 14       |           |
| 216.0979  | 2  | S 13       | 1403.7431 |
| 273.1193  | 3  | G 12       | 1316.7110 |
| 420.1878  | 4  | F 11       | 1259.6896 |
| 477.2092  | 5  | G 10       | 1112.6212 |
| 534.2307  | 6  | G 9        | 1055.5997 |
| 662.2893  | 7  | Q 8        | 998.5782  |
| 763.3369  | 8  | T 7        | 870.5196  |
| 905.4476  | 9  | <b>K</b> 6 | 769.4720  |
| 1002.5004 | 10 | P 5        | 627.3613  |
| 1101.5688 | 11 | V 4        | 530.3085  |
| 1248.6372 | 12 | F 3        | 431.2401  |
| 1385.6961 | 13 | H 2        | 284.1717  |
|           | 14 | K 1        | 147.1128  |

[\[Click\]](#) to move table  
 Static Modifications:  
 C: 57.02146  
 Variable Modifications:  
 K: 14.0157



# Rpl42ab

## K.QSGFGGQTmono**K**PVFHK.K [46, 59]

QSGFGGQT**K**PVFHK, MH+ 1534.8205, m/z 767.9139

File: 070414-Clarke-Katelyn-CytoRPs-met6del-H-L-1-1, Scan: 6441, Precursor m/z: 767.91364, Charge: 2

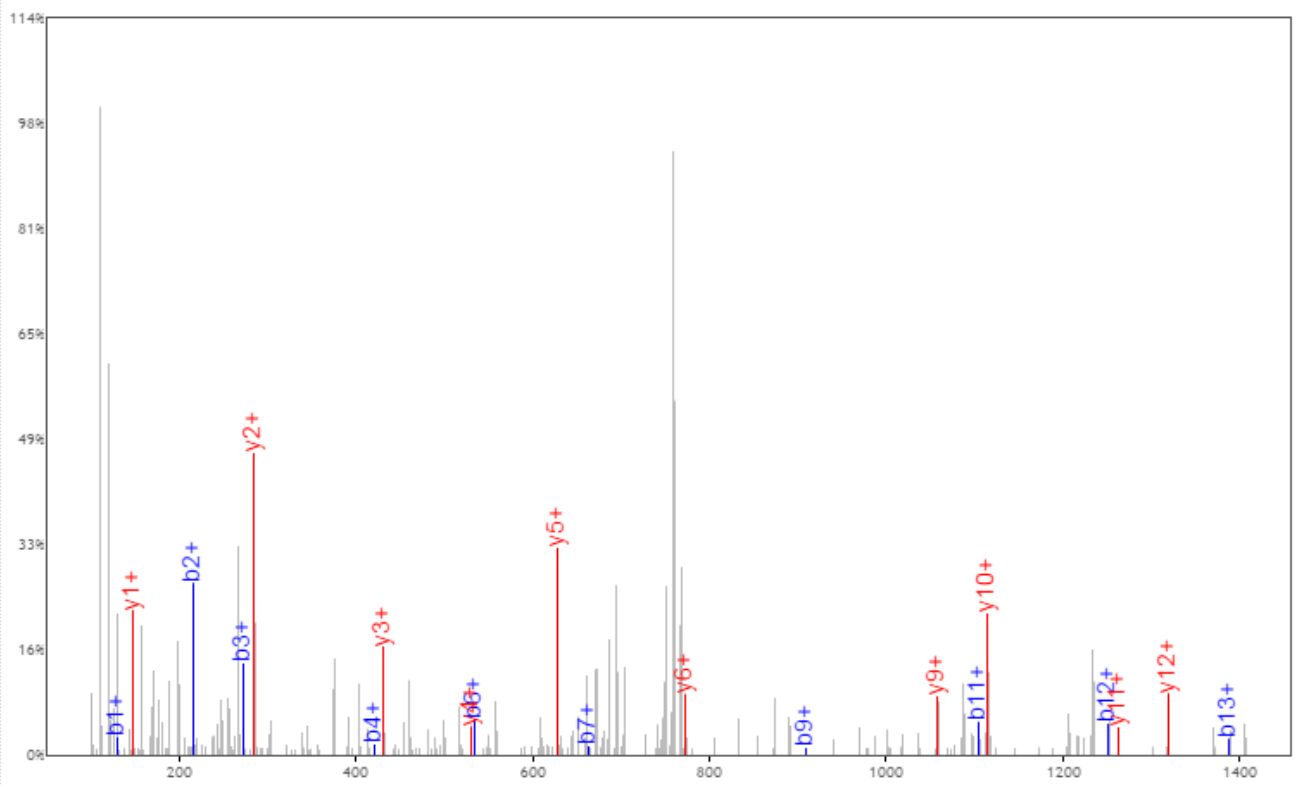

| b+        | #  | Seq #      | y+        |
|-----------|----|------------|-----------|
| 129.0659  | 1  | Q 14       |           |
| 216.0979  | 2  | S 13       | 1406.7620 |
| 273.1193  | 3  | G 12       | 1319.7299 |
| 420.1878  | 4  | F 11       | 1262.7085 |
| 477.2092  | 5  | G 10       | 1115.6401 |
| 534.2307  | 6  | G 9        | 1058.6186 |
| 662.2893  | 7  | Q 8        | 1001.5971 |
| 763.3369  | 8  | T 7        | 873.5385  |
| 908.4665  | 9  | <b>K</b> 6 | 772.4909  |
| 1005.5193 | 10 | P 5        | 627.3613  |
| 1104.5877 | 11 | V 4        | 530.3085  |
| 1251.6561 | 12 | F 3        | 431.2401  |
| 1388.7150 | 13 | H 2        | 284.1717  |
|           | 14 | K 1        | 147.1128  |

[Click](#) to move table

Static Modifications:  
 C: 57.02146  
 M: 3.0189  
 Variable Modifications:  
 K: 17.0346

# Rpl42ab

K.QSGFGGQTmono**K**PVFHK.K [46, 59]

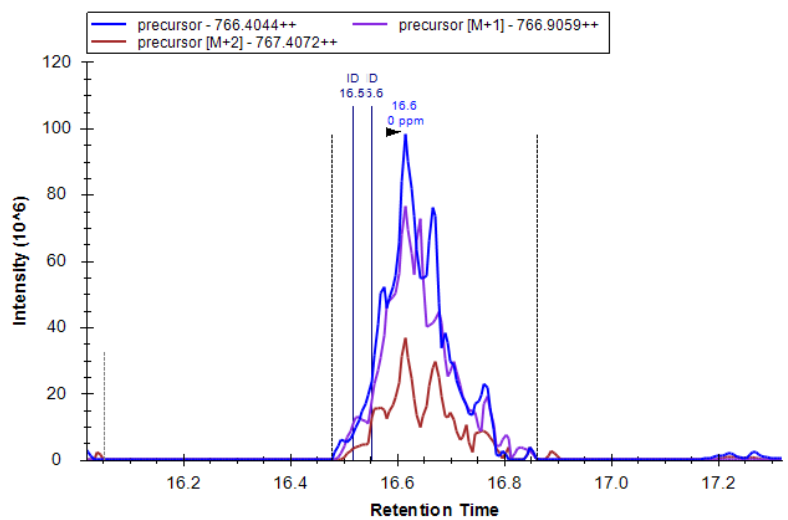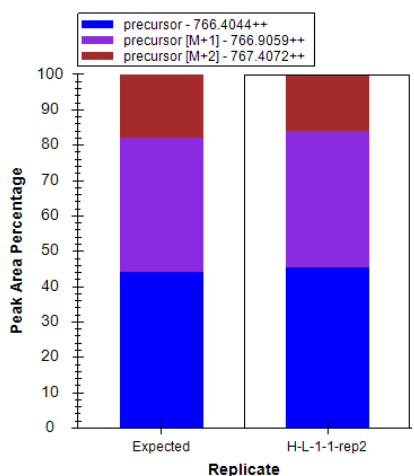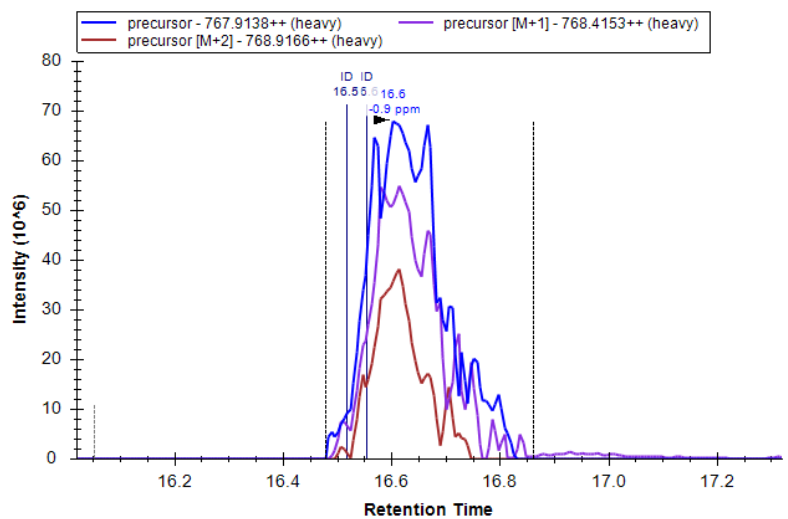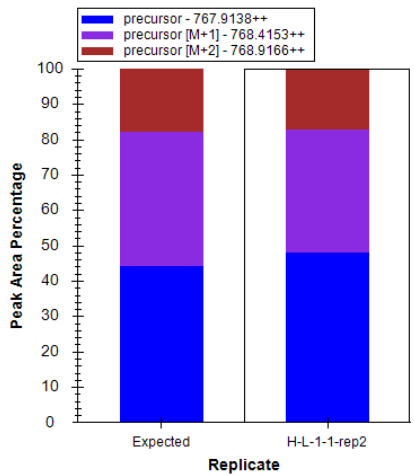

Replicate 2

# Rpl42ab

## K.QSGFGGQTmono**K**PVFHK.K [46, 59]

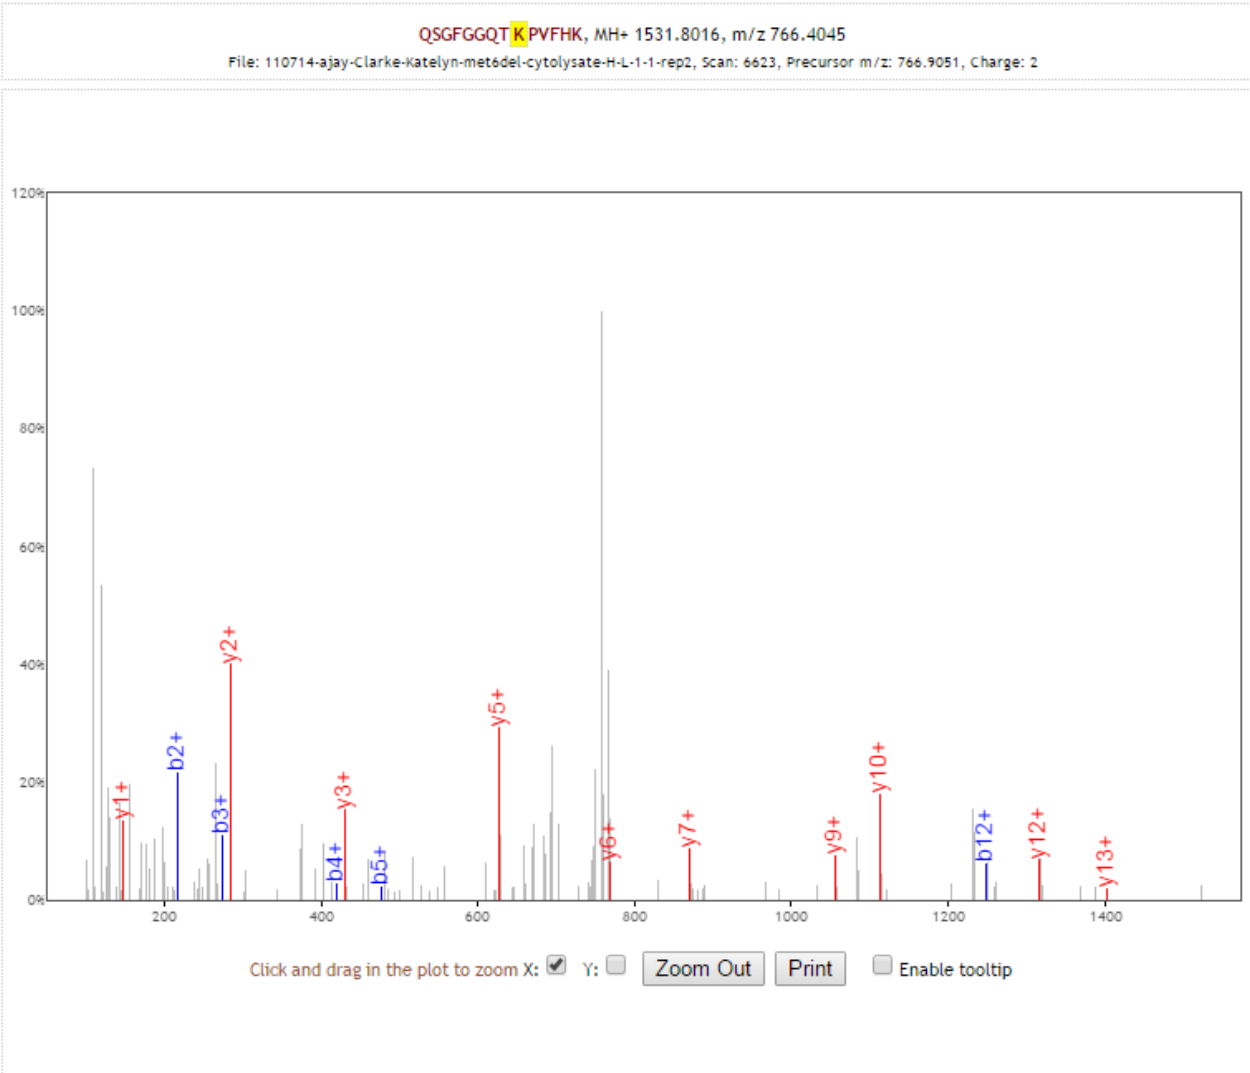

| b+        | #  | Seq # | y+        |
|-----------|----|-------|-----------|
| 129.0659  | 1  | Q 14  |           |
| 216.0979  | 2  | S 13  | 1403.7431 |
| 273.1193  | 3  | G 12  | 1316.7110 |
| 420.1878  | 4  | F 11  | 1259.6896 |
| 477.2092  | 5  | G 10  | 1112.6212 |
| 534.2307  | 6  | G 9   | 1055.5997 |
| 662.2893  | 7  | Q 8   | 998.5782  |
| 763.3369  | 8  | T 7   | 870.5196  |
| 905.4476  | 9  | K 6   | 769.4720  |
| 1002.5004 | 10 | P 5   | 627.3613  |
| 1101.5688 | 11 | V 4   | 530.3085  |
| 1248.6372 | 12 | F 3   | 431.2401  |
| 1385.6961 | 13 | H 2   | 284.1717  |
|           | 14 | K 1   | 147.1128  |

[\[click\]](#) to move table  
Static Modifications:  
C: 57.02146  
Variable Modifications:  
K: 14.0157

# Rpl42ab

## K.QSGFGGQTmono**K**PVFHK.K [46, 59]

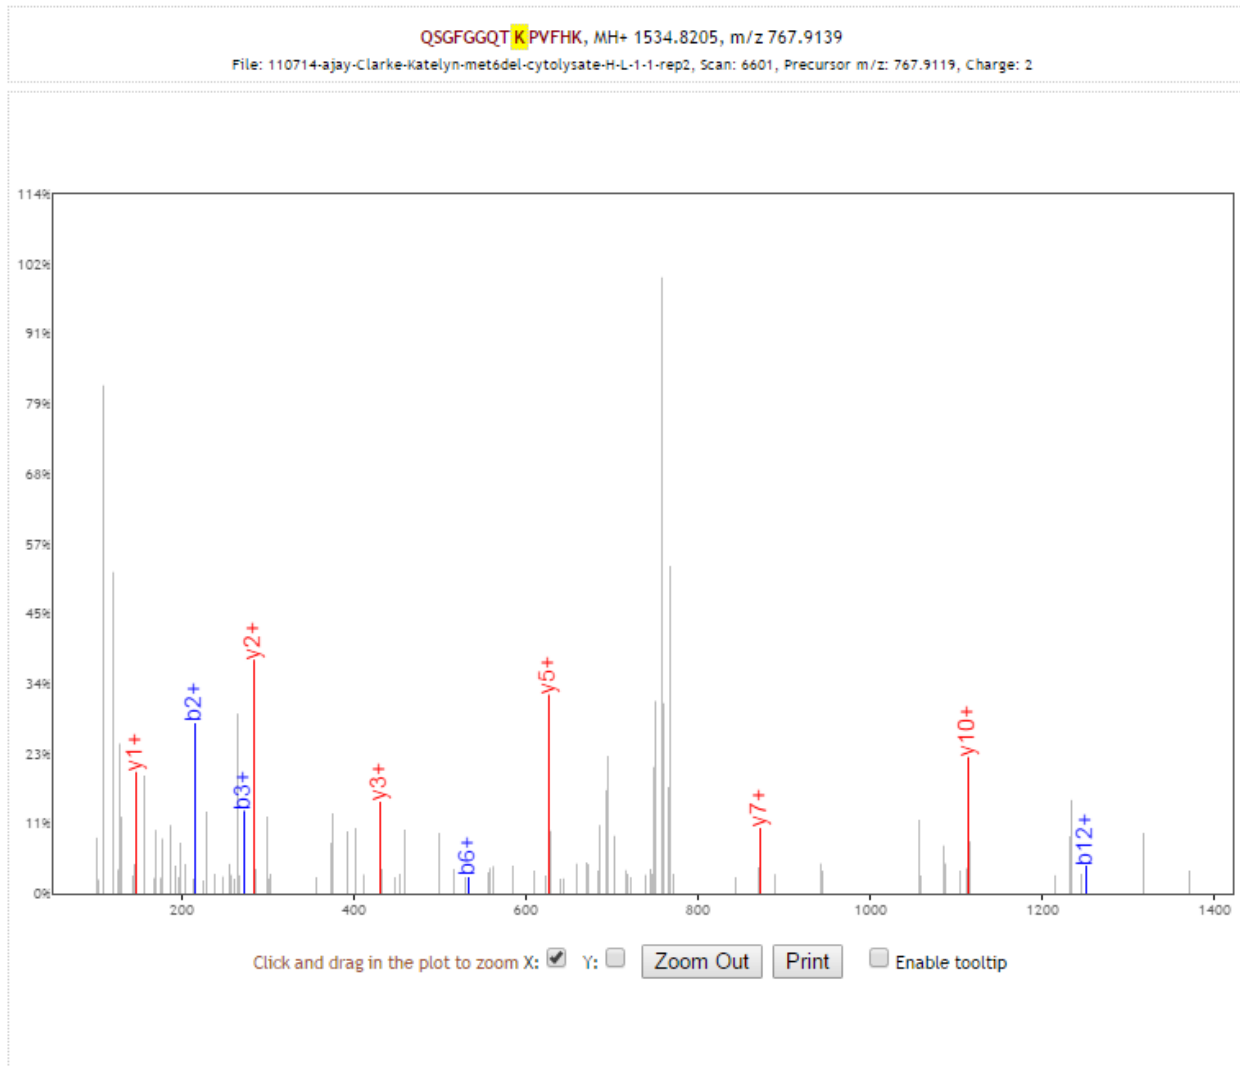

| b+        | #  | Seq | #  | y+        |
|-----------|----|-----|----|-----------|
| 129.0659  | 1  | Q   | 14 |           |
| 216.0979  | 2  | S   | 13 | 1406.7620 |
| 273.1193  | 3  | G   | 12 | 1319.7299 |
| 420.1878  | 4  | F   | 11 | 1262.7085 |
| 477.2092  | 5  | G   | 10 | 1115.6401 |
| 534.2307  | 6  | G   | 9  | 1058.6186 |
| 662.2893  | 7  | Q   | 8  | 1001.5971 |
| 763.3369  | 8  | T   | 7  | 873.5385  |
| 908.4665  | 9  | K   | 6  | 772.4909  |
| 1005.5193 | 10 | P   | 5  | 627.3613  |
| 1104.5877 | 11 | V   | 4  | 530.3085  |
| 1251.6561 | 12 | F   | 3  | 431.2401  |
| 1388.7150 | 13 | H   | 2  | 284.1717  |
|           | 14 | K   | 1  | 147.1128  |

[\[Click\]](#) to move table

Static Modifications:  
C: 57.02146  
M: 3.0189

Variable Modifications:  
K: 17.0346

# Rpl42ab

K.QSGFGGQTmono**K**PVFHK.K [46, 59]

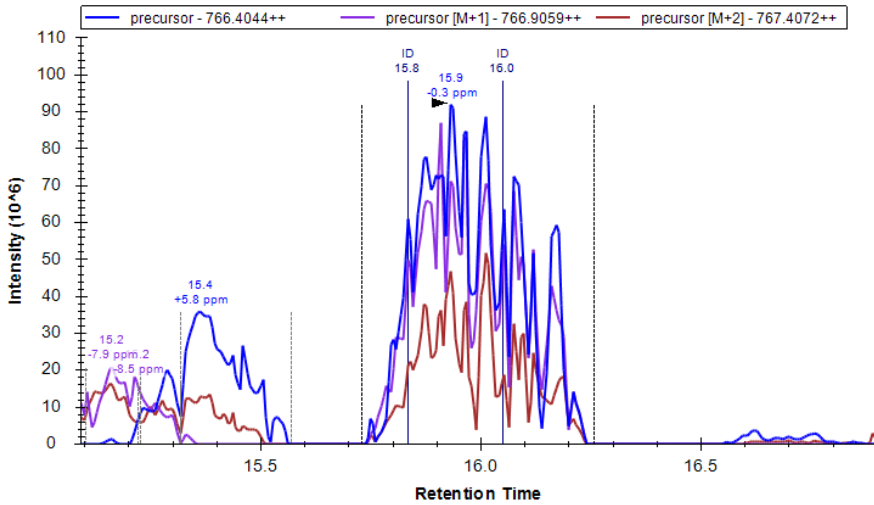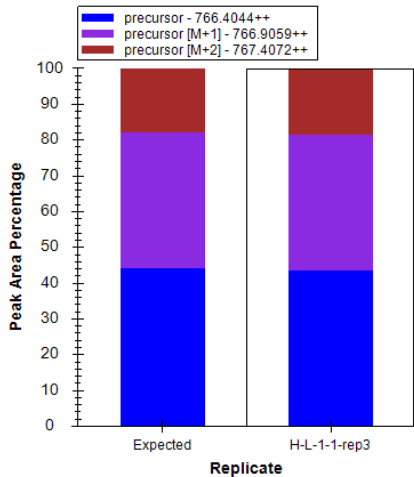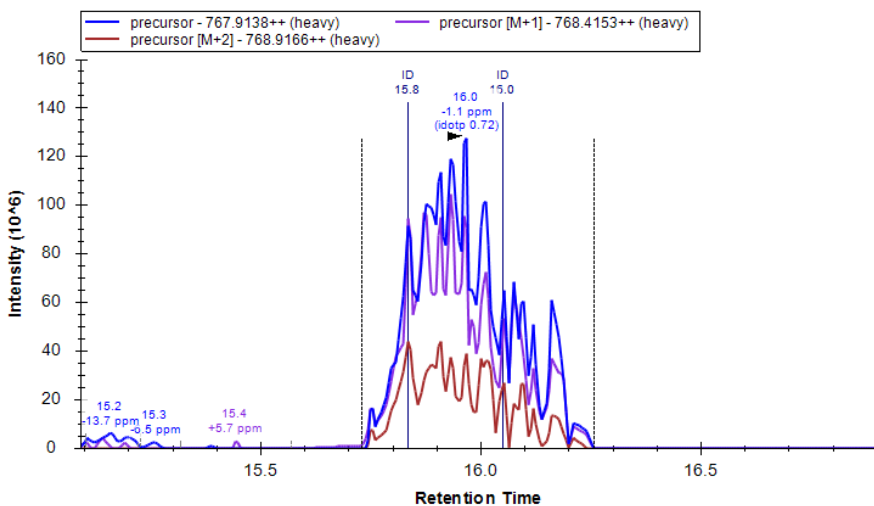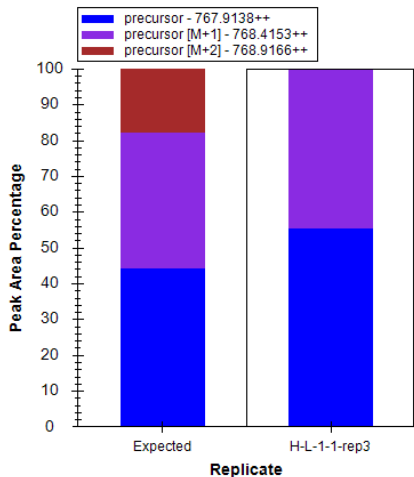

Replicate 3

# Rpl42ab

## K.QSGFGGQTmono**K**PVFHK.K [46, 59]

QSGFGGQT**K**PVFHK, MH+ 1531.8016, m/z 766.4045

File: 110714-ajay-Clarke-Katelyn-metódel-cytolysate-H-L-1-1-rep3, Scan: 6601, Precursor m/z: 766.4032, Charge: 2

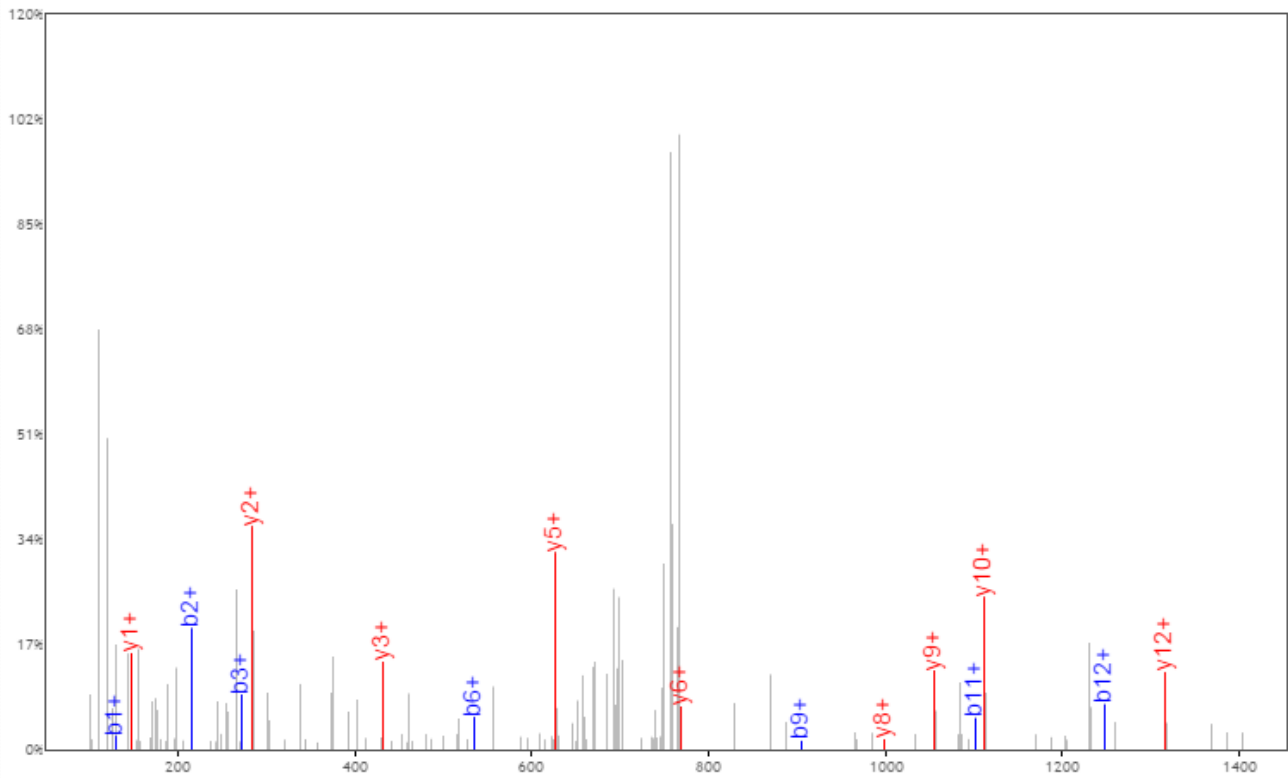

Click and drag in the plot to zoom X:  Y:     Enable tooltip

| b+        | #  | Seq | #  | y+        |
|-----------|----|-----|----|-----------|
| 129.0659  | 1  | Q   | 14 |           |
| 216.0979  | 2  | S   | 13 | 1403.7431 |
| 273.1193  | 3  | G   | 12 | 1316.7110 |
| 420.1878  | 4  | F   | 11 | 1259.6896 |
| 477.2092  | 5  | G   | 10 | 1112.6212 |
| 534.2307  | 6  | G   | 9  | 1055.5997 |
| 662.2893  | 7  | Q   | 8  | 998.5782  |
| 763.3369  | 8  | T   | 7  | 870.5196  |
| 905.4476  | 9  | K   | 6  | 769.4720  |
| 1002.5004 | 10 | P   | 5  | 627.3613  |
| 1101.5688 | 11 | V   | 4  | 530.3085  |
| 1248.6372 | 12 | F   | 3  | 431.2401  |
| 1385.6961 | 13 | H   | 2  | 284.1717  |
|           | 14 | K   | 1  | 147.1128  |

[click] to move table

Static Modifications:  
C: 57.02146

Variable Modifications:  
K: 14.0157

# Rpl42ab

K.QSGFGGQTmono**K**PVFHK.K [46, 59]

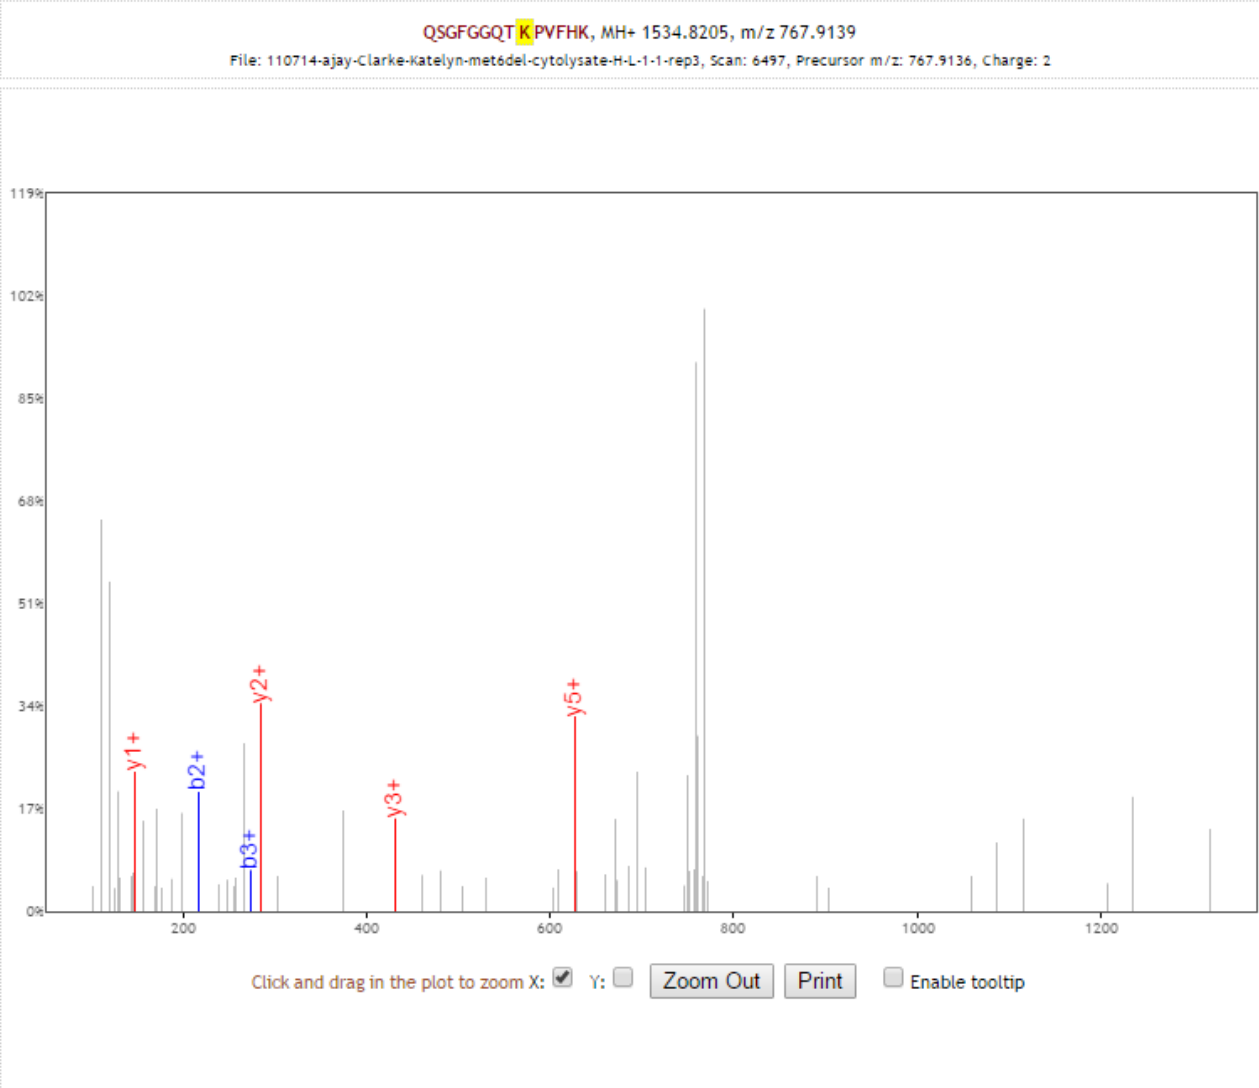

| b+        | #  | Seq # | y+ |
|-----------|----|-------|----|
| 129.0659  | 1  | Q     | 14 |
| 216.0979  | 2  | S     | 13 |
| 273.1193  | 3  | G     | 12 |
| 420.1878  | 4  | F     | 11 |
| 477.2092  | 5  | G     | 10 |
| 534.2307  | 6  | G     | 9  |
| 662.2893  | 7  | Q     | 8  |
| 763.3369  | 8  | T     | 7  |
| 908.4665  | 9  | K     | 6  |
| 1005.5193 | 10 | P     | 5  |
| 1104.5877 | 11 | V     | 4  |
| 1251.6561 | 12 | F     | 3  |
| 1388.7150 | 13 | H     | 2  |
|           | 14 | K     | 1  |

[\[click\]](#) to move table

Static Modifications:  
 C: 57.02146  
 M: 3.0189

Variable Modifications:  
 K: 17.0346

# Rpl42ab

K.QSGFGGQTKPVFHKK.A [46, 60] (missed 1)

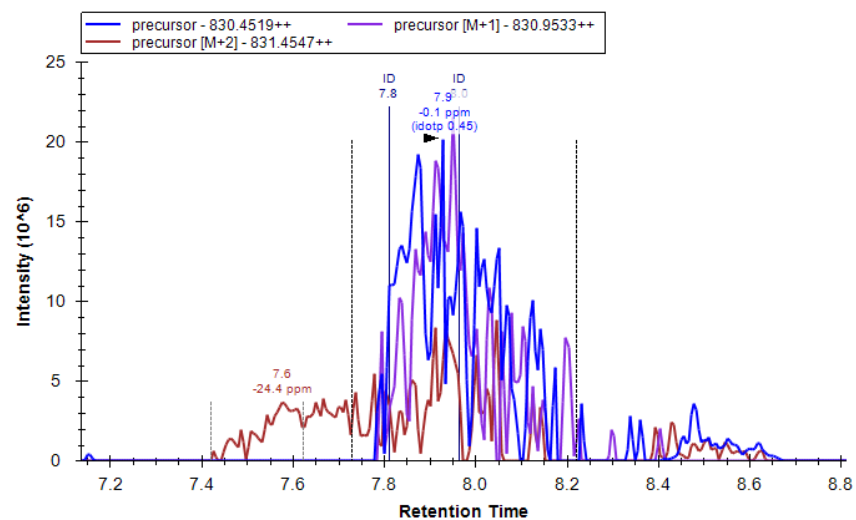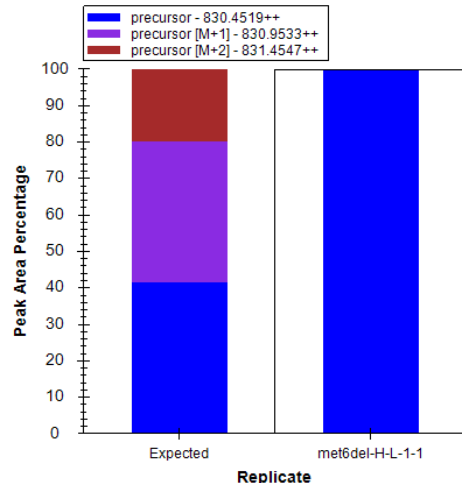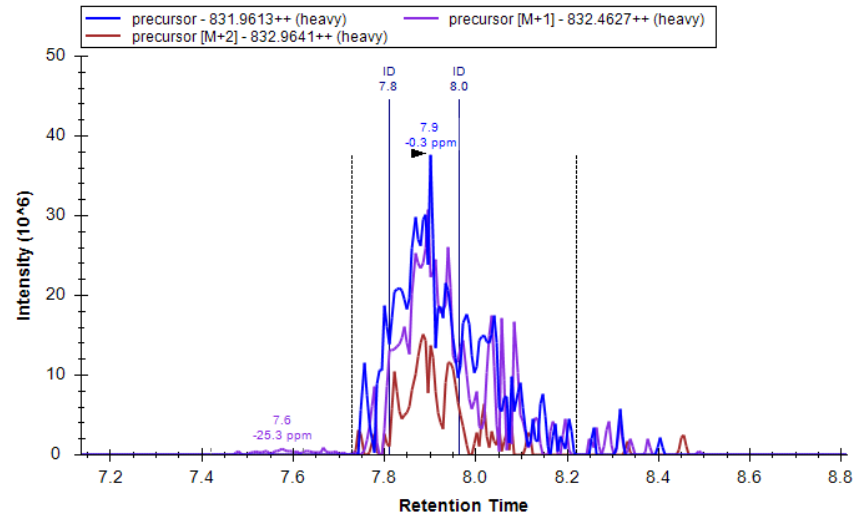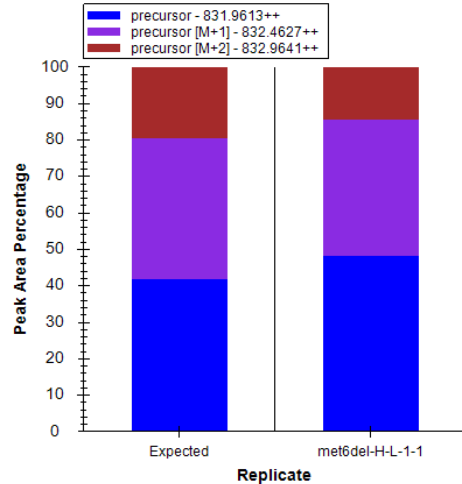

Replicate 1



# Rpl42ab

## K.QSGFGGQT**K**PVFHKK.A [46, 60] (missed 1)

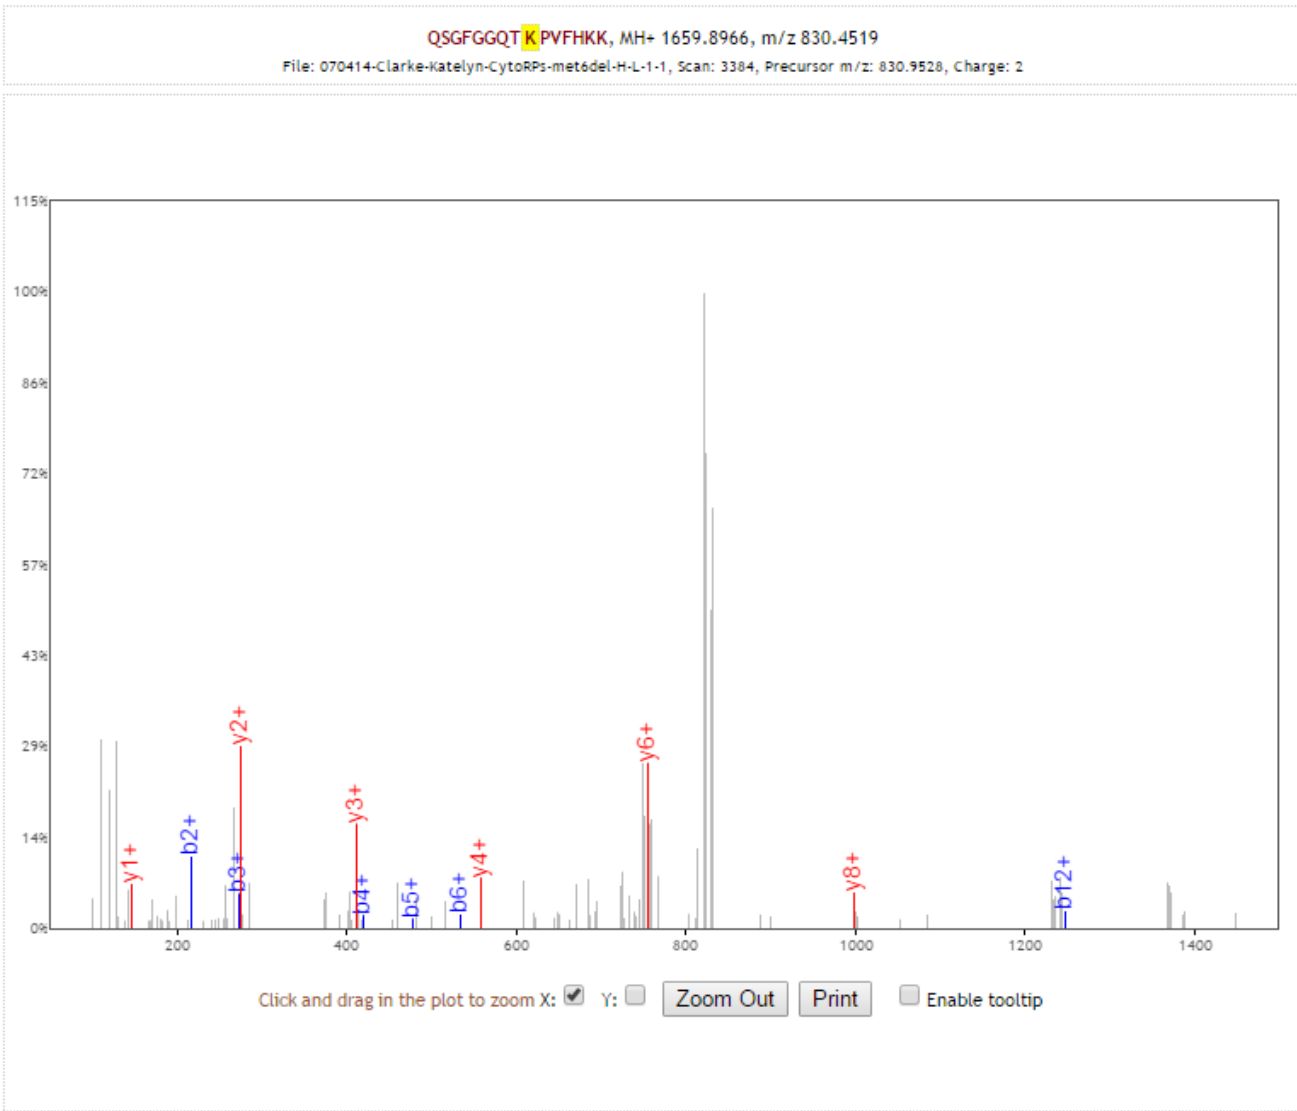

| b+        | #  | Seq # | y+ |           |
|-----------|----|-------|----|-----------|
| 129.0659  | 1  | Q     | 15 |           |
| 216.0979  | 2  | S     | 14 | 1531.8380 |
| 273.1193  | 3  | G     | 13 | 1444.8060 |
| 420.1878  | 4  | F     | 12 | 1387.7845 |
| 477.2092  | 5  | G     | 11 | 1240.7161 |
| 534.2307  | 6  | G     | 10 | 1183.6947 |
| 662.2893  | 7  | Q     | 9  | 1126.6732 |
| 763.3369  | 8  | T     | 8  | 998.6146  |
| 905.4476  | 9  | K     | 7  | 897.5669  |
| 1002.5004 | 10 | P     | 6  | 755.4563  |
| 1101.5688 | 11 | V     | 5  | 658.4035  |
| 1248.6372 | 12 | F     | 4  | 559.3351  |
| 1385.6961 | 13 | H     | 3  | 412.2667  |
| 1513.7911 | 14 | K     | 2  | 275.2078  |
|           | 15 | K     | 1  | 147.1128  |

[\[Click\]](#) to move table  
Static Modifications:  
C: 57.02146  
Variable Modifications:  
K: 14.0157

# Rpl42ab

K.QSGFGGQTKPVFHKK.A [46, 60] (missed 1)

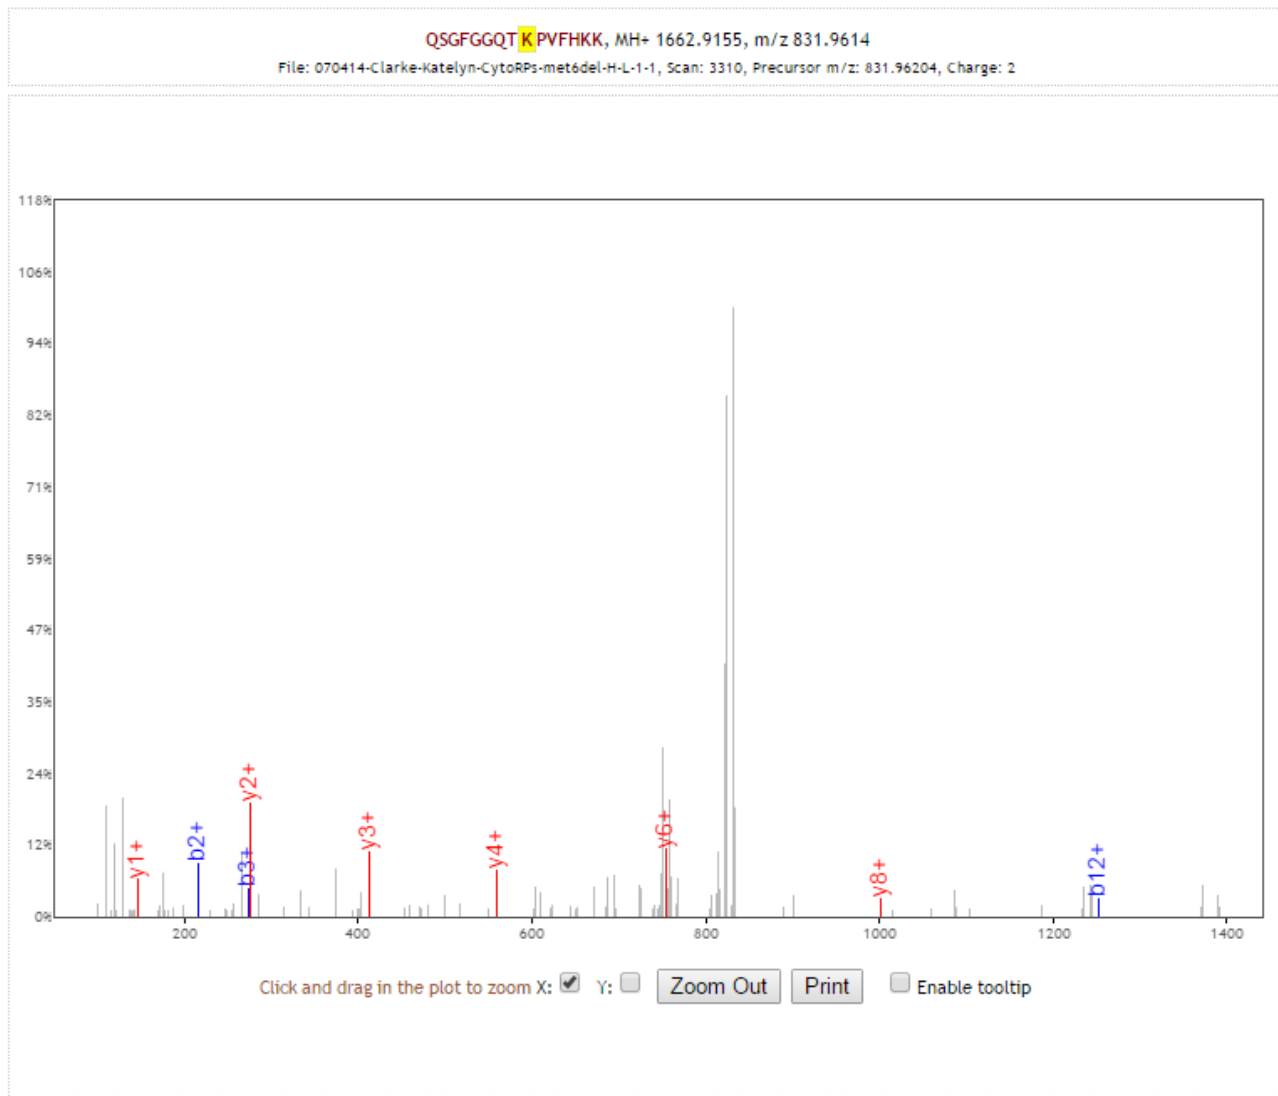

| b+        | #  | Seq | #  | y+        |
|-----------|----|-----|----|-----------|
| 129.0659  | 1  | Q   | 15 |           |
| 216.0979  | 2  | S   | 14 | 1534.8569 |
| 273.1193  | 3  | G   | 13 | 1447.8249 |
| 420.1878  | 4  | F   | 12 | 1390.8034 |
| 477.2092  | 5  | G   | 11 | 1243.7350 |
| 534.2307  | 6  | G   | 10 | 1186.7136 |
| 662.2893  | 7  | Q   | 9  | 1129.6921 |
| 763.3369  | 8  | T   | 8  | 1001.6335 |
| 908.4665  | 9  | K   | 7  | 900.5858  |
| 1005.5193 | 10 | P   | 6  | 755.4563  |
| 1104.5877 | 11 | V   | 5  | 658.4035  |
| 1251.6561 | 12 | F   | 4  | 559.3351  |
| 1388.7150 | 13 | H   | 3  | 412.2667  |
| 1516.8100 | 14 | K   | 2  | 275.2078  |
|           | 15 | K   | 1  | 147.1128  |

[\[Click\]](#) to move table

Static Modifications:  
 C: 57.02146  
 M: 3.0189

Variable Modifications:  
 K: 17.0346

# Hsp26

K.EVARPNYAGALYDPRDETLDDWFDNDLSLFP SGFGFPdi**R**.S [50, 88] (missed 1)

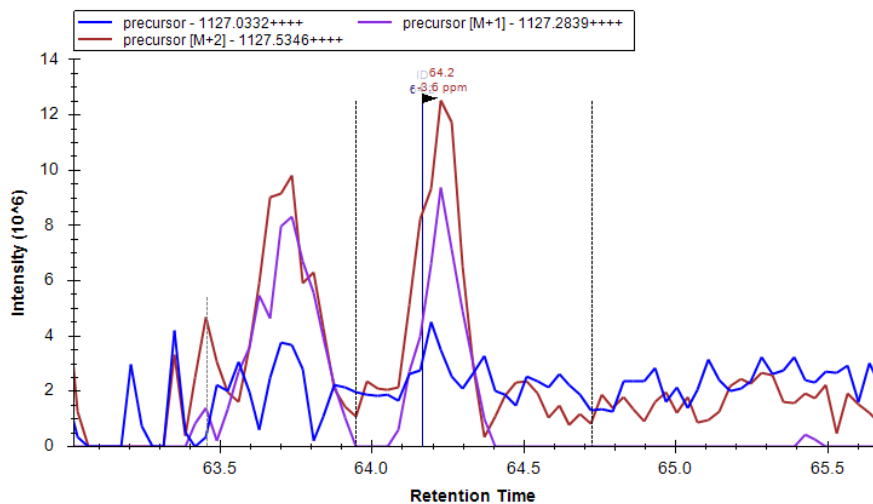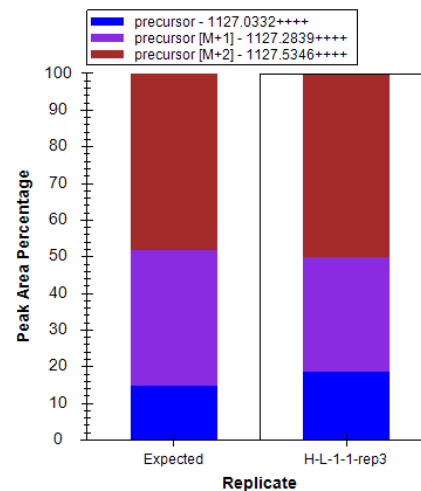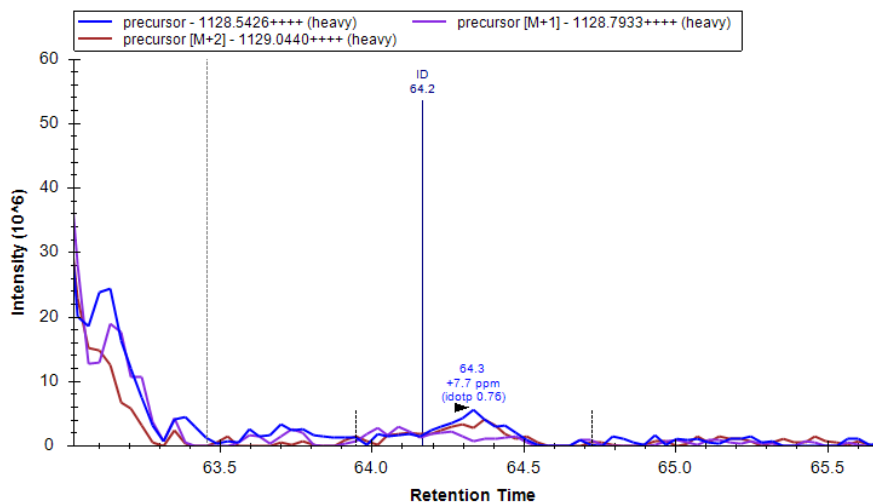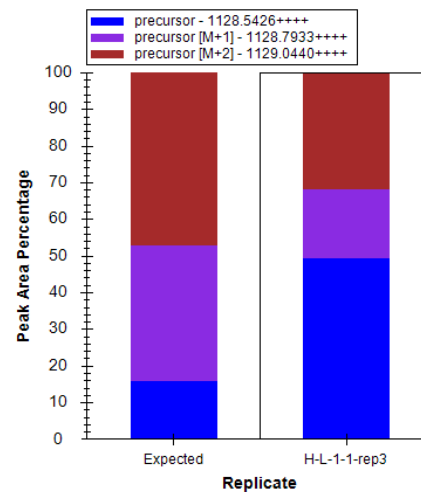

Replicate 3

# Hsp26

# K.EVARNNYAGALYDPRDETLDDWFDNDLSLFPSTGFGFPdiR.S [50, 88] (missed 1)

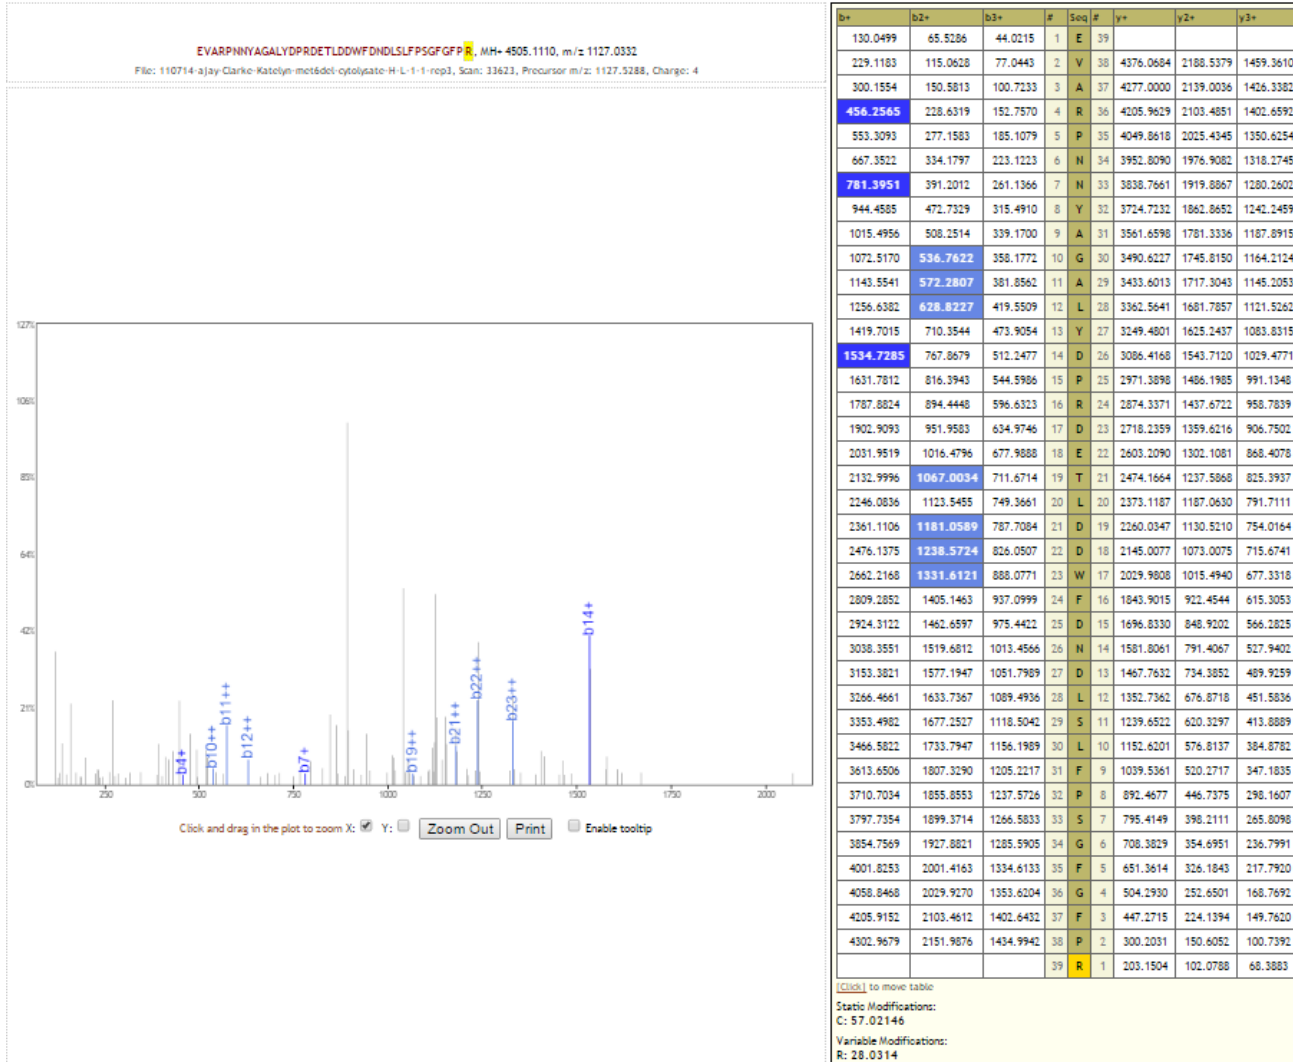

# Ssa4

K.mono**K**SEVFSTYADNQPGLIQLVFEGE.R.T [421, 444] (missed 1)

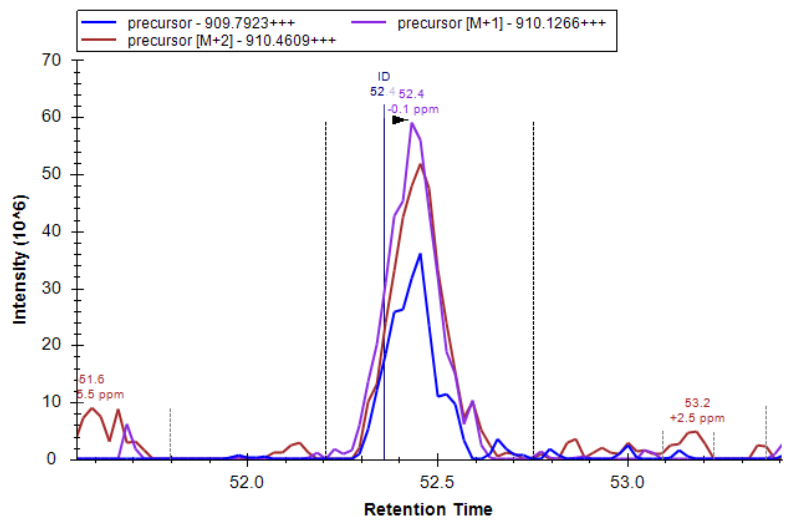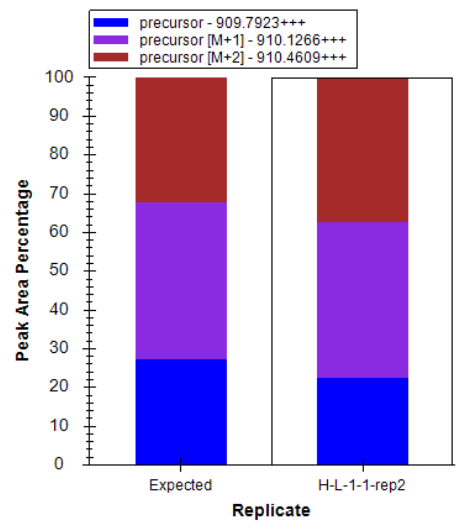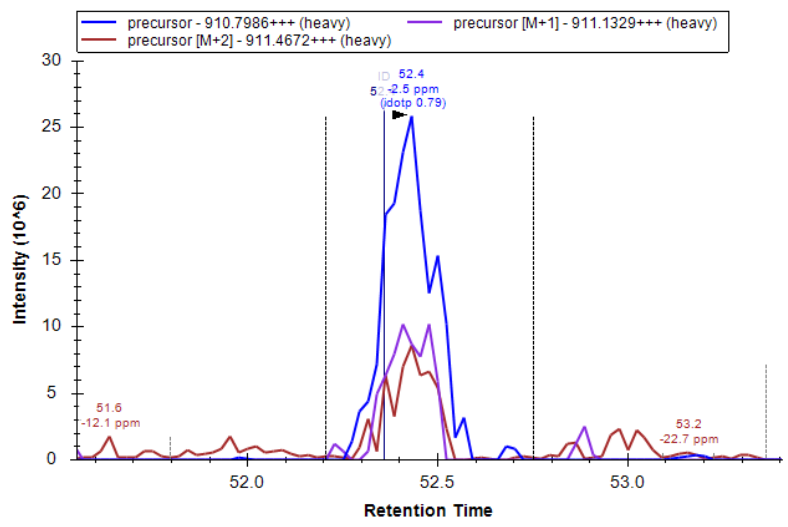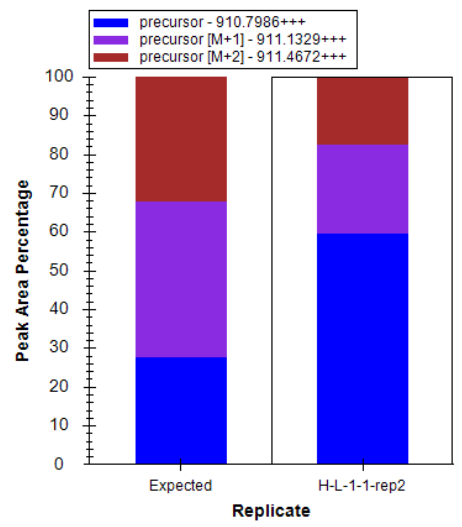

Replicate 2

# Ssa4

## K.mono**K**SEVFSTYADNQPGLIQVFEGE.R.T [421, 444] (missed 1)

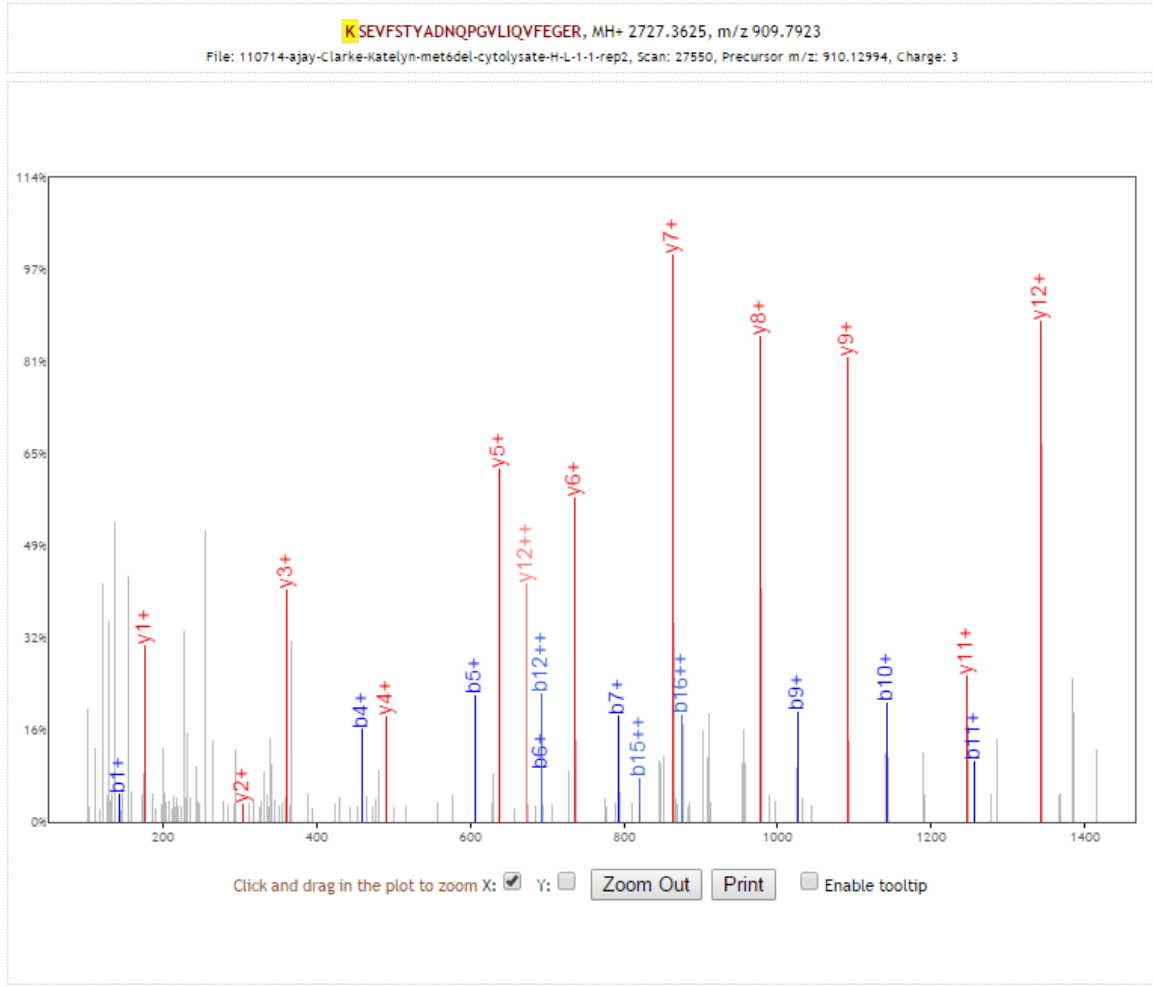

| b+        | b2+       | #  | Seq | #  | y+        | y2+       |
|-----------|-----------|----|-----|----|-----------|-----------|
| 143.1179  | 72.0626   | 1  | K   | 24 |           |           |
| 230.1500  | 115.5786  | 2  | S   | 23 | 2585.2518 | 1293.1295 |
| 359.1926  | 180.0999  | 3  | E   | 22 | 2498.2198 | 1249.6135 |
| 458.2610  | 229.6341  | 4  | V   | 21 | 2369.1772 | 1185.0922 |
| 605.3294  | 303.1683  | 5  | F   | 20 | 2270.1088 | 1135.5580 |
| 692.3614  | 346.6843  | 6  | S   | 19 | 2123.0404 | 1062.0238 |
| 793.4091  | 397.2082  | 7  | T   | 18 | 2036.0083 | 1018.5078 |
| 956.4724  | 478.7399  | 8  | Y   | 17 | 1934.9607 | 967.9840  |
| 1027.5095 | 514.2584  | 9  | A   | 16 | 1771.8973 | 886.4523  |
| 1142.5365 | 571.7719  | 10 | D   | 15 | 1700.8602 | 850.9338  |
| 1256.5794 | 628.7933  | 11 | N   | 14 | 1585.8333 | 793.4203  |
| 1384.6380 | 692.8226  | 12 | Q   | 13 | 1471.7904 | 736.3988  |
| 1481.6907 | 741.3490  | 13 | P   | 12 | 1343.7318 | 672.3695  |
| 1538.7122 | 769.8597  | 14 | G   | 11 | 1246.6790 | 623.8431  |
| 1637.7806 | 819.3940  | 15 | V   | 10 | 1189.6575 | 595.3324  |
| 1750.8647 | 875.9360  | 16 | L   | 9  | 1090.5891 | 545.7982  |
| 1863.9488 | 932.4780  | 17 | I   | 8  | 977.5051  | 489.2562  |
| 1992.0073 | 996.5073  | 18 | Q   | 7  | 864.4210  | 432.7141  |
| 2091.0757 | 1046.0415 | 19 | V   | 6  | 736.3624  | 368.6849  |
| 2238.1442 | 1119.5757 | 20 | F   | 5  | 637.2940  | 319.1506  |
| 2367.1868 | 1184.0970 | 21 | E   | 4  | 490.2256  | 245.6164  |
| 2424.2082 | 1212.6077 | 22 | G   | 3  | 361.1830  | 181.0951  |
| 2553.2508 | 1277.1290 | 23 | E   | 2  | 304.1615  | 152.5844  |
|           |           | 24 | R   | 1  | 175.1190  | 88.0631   |

[\[click\]](#) to move table  
 Static Modifications:  
 C: 57.02146  
 Variable Modifications:  
 K: 14.0157

# Ssa4

K.mono**K**SEVFSTYADNQPGLIQLVFEGE.R.T [421, 444] (missed 1)

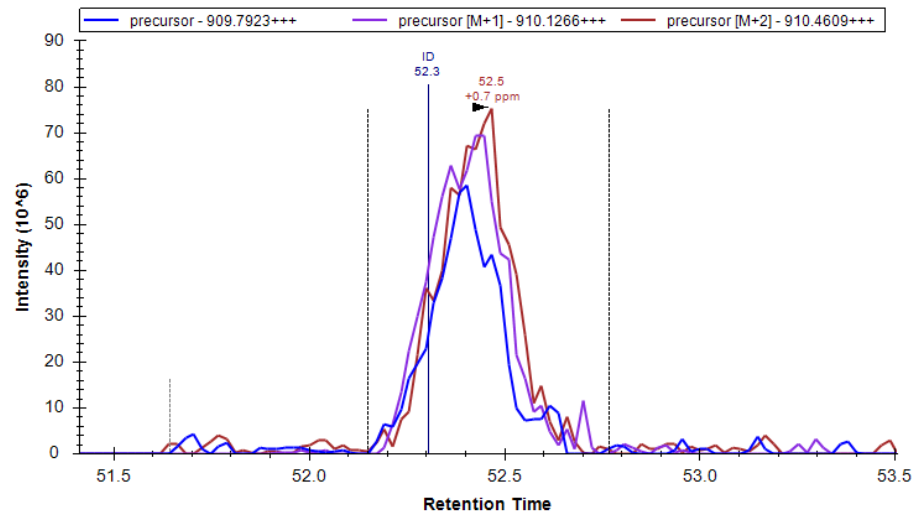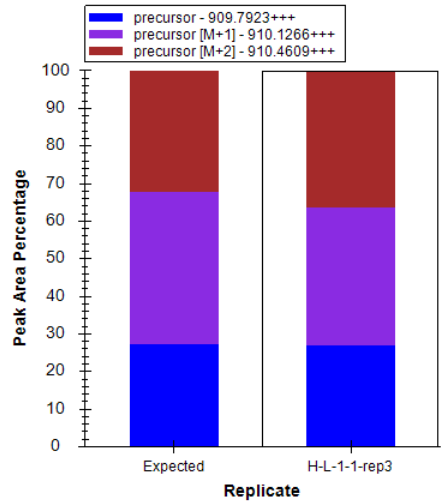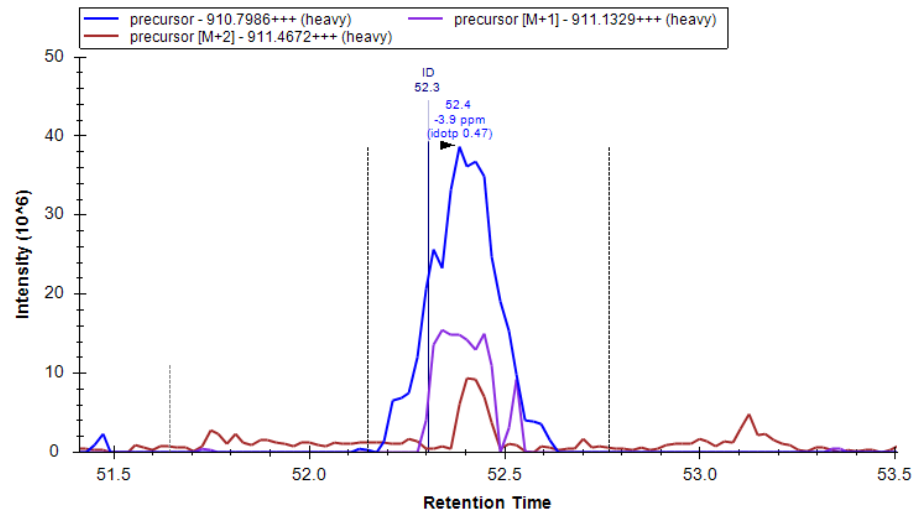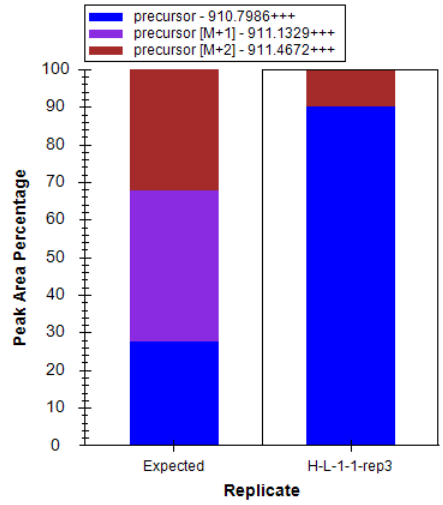

Replicate 3

# Ssa4

## K.mono**K**SEVFSTYADNQPGLVLIQVFEGE.R.T [421, 444] (missed 1)

**K**SEVFSTYADNQPGLVLIQVFEGE.R, MH+ 2727.3625, m/z 909.7923

File: 110714-ajay-Clarke-Katelyn-metödel-cytolysate-H-L-1-1-rep3, Scan: 28217, Precursor m/z: 910.4617, Charge: 3

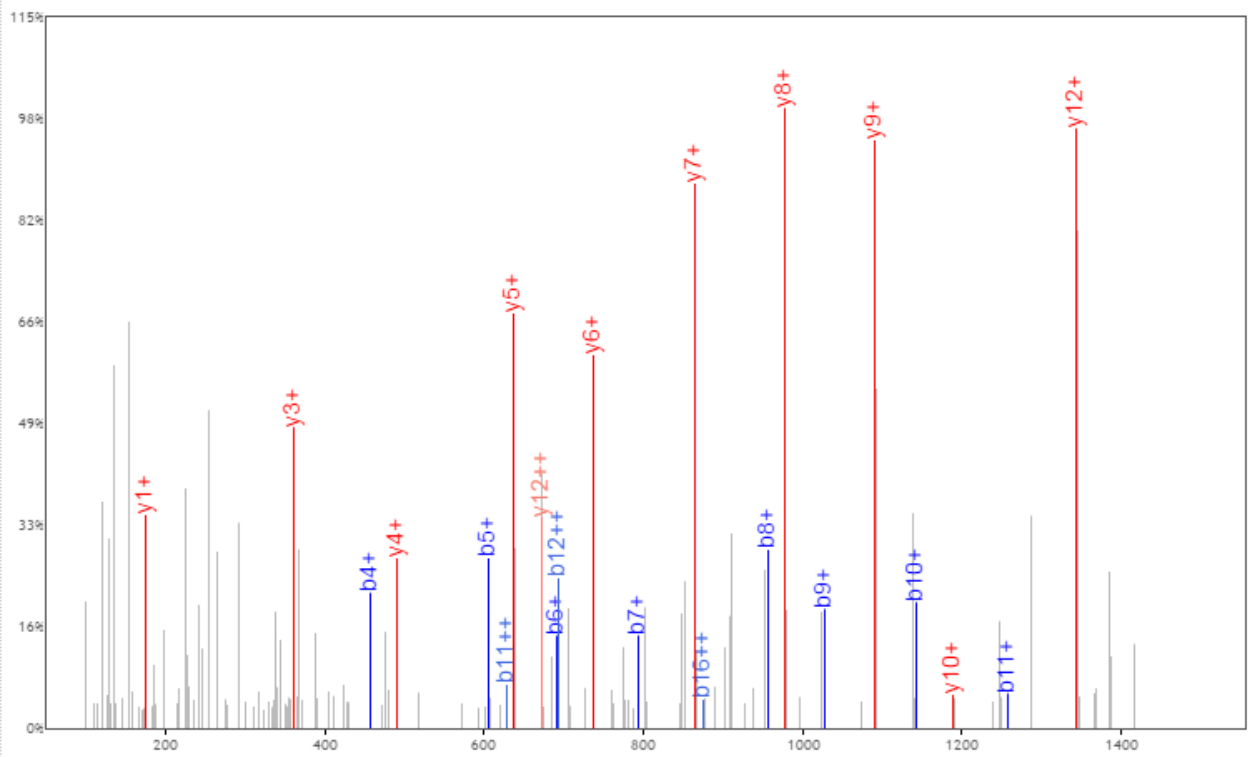

Click and drag in the plot to zoom X:  Y:  Zoom Out Print  Enable tooltip

| b+               | b2+             | #  | Seq #    | y+ | y2+                              |
|------------------|-----------------|----|----------|----|----------------------------------|
| 143.1179         | 72.0626         | 1  | <b>K</b> | 24 |                                  |
| 230.1500         | 115.5786        | 2  | S        | 23 | 2585.2518 1293.1295              |
| 359.1926         | 180.0999        | 3  | E        | 22 | 2498.2198 1249.6135              |
| <b>458.2610</b>  | 229.6341        | 4  | V        | 21 | 2369.1772 1185.0922              |
| <b>605.3294</b>  | 303.1683        | 5  | F        | 20 | 2270.1088 1135.5580              |
| <b>692.3614</b>  | 346.6843        | 6  | S        | 19 | 2123.0404 1062.0238              |
| <b>793.4091</b>  | 397.2082        | 7  | T        | 18 | 2036.0083 1018.5078              |
| <b>956.4724</b>  | 478.7399        | 8  | Y        | 17 | 1934.9607 967.9840               |
| <b>1027.5095</b> | 514.2584        | 9  | A        | 16 | 1771.8973 886.4523               |
| <b>1142.5365</b> | 571.7719        | 10 | D        | 15 | 1700.8602 850.9338               |
| <b>1256.5794</b> | 628.7933        | 11 | N        | 14 | 1585.8333 793.4203               |
| 1384.6380        | <b>692.8226</b> | 12 | Q        | 13 | 1471.7904 736.3988               |
| 1481.6907        | 741.3490        | 13 | P        | 12 | <b>1343.7318</b> <b>672.3695</b> |
| 1538.7122        | 769.8597        | 14 | G        | 11 | 1246.6790 623.8431               |
| 1637.7806        | 819.3940        | 15 | V        | 10 | <b>1189.6575</b> 595.3324        |
| 1750.8647        | <b>875.9360</b> | 16 | L        | 9  | <b>1090.5891</b> 545.7982        |
| 1863.9488        | 932.4780        | 17 | I        | 8  | <b>977.5051</b> 489.2562         |
| 1992.0073        | 996.5073        | 18 | Q        | 7  | <b>864.4210</b> 432.7141         |
| 2091.0757        | 1046.0415       | 19 | V        | 6  | <b>736.3624</b> 368.6849         |
| 2238.1442        | 1119.5757       | 20 | F        | 5  | <b>637.2940</b> 319.1506         |
| 2367.1868        | 1184.0970       | 21 | E        | 4  | <b>490.2256</b> 245.6164         |
| 2424.2082        | 1212.6077       | 22 | G        | 3  | <b>361.1830</b> 181.0951         |
| 2553.2508        | 1277.1290       | 23 | E        | 2  | 304.1615 152.5844                |
|                  |                 | 24 | R        | 1  | <b>175.1190</b> 88.0631          |

[\[Click\]](#) to move table  
 Static Modifications:  
 C: 57.02146  
 Variable Modifications:  
 K: 14.0157



# Ssa2

K.mono**K**SEVFSTYADNQPGLIQVFEGER.A [420, 443] (missed 1)

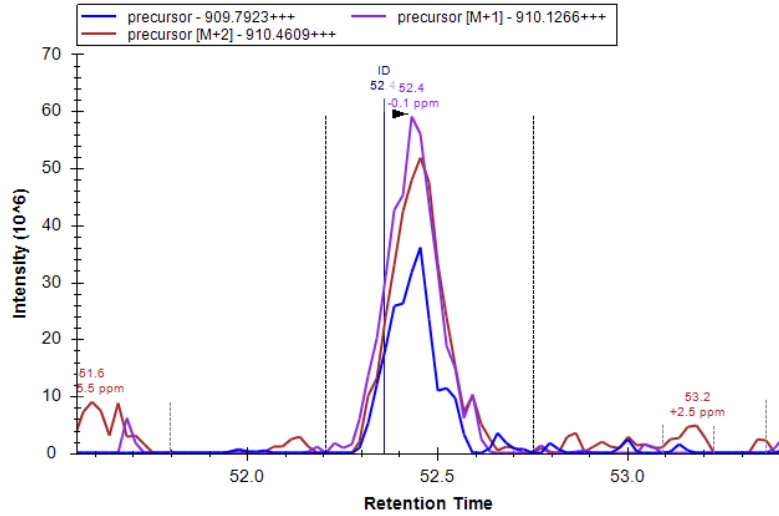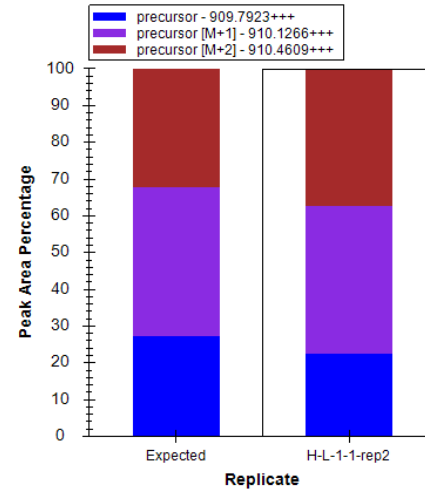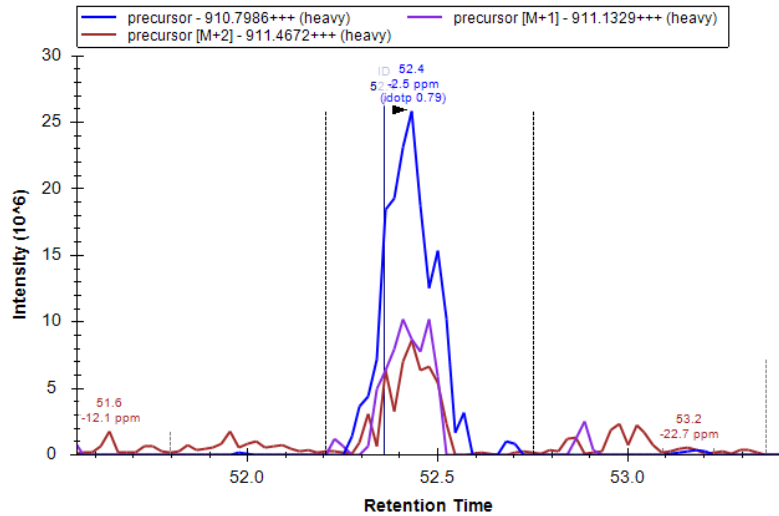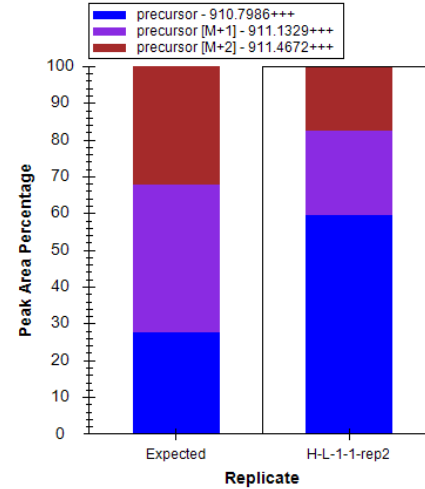

Replicate 2

# Ssa2

K.mono**K**SEVFSTYADNQPGLIQVFEGER.A [420, 443] (missed 1)

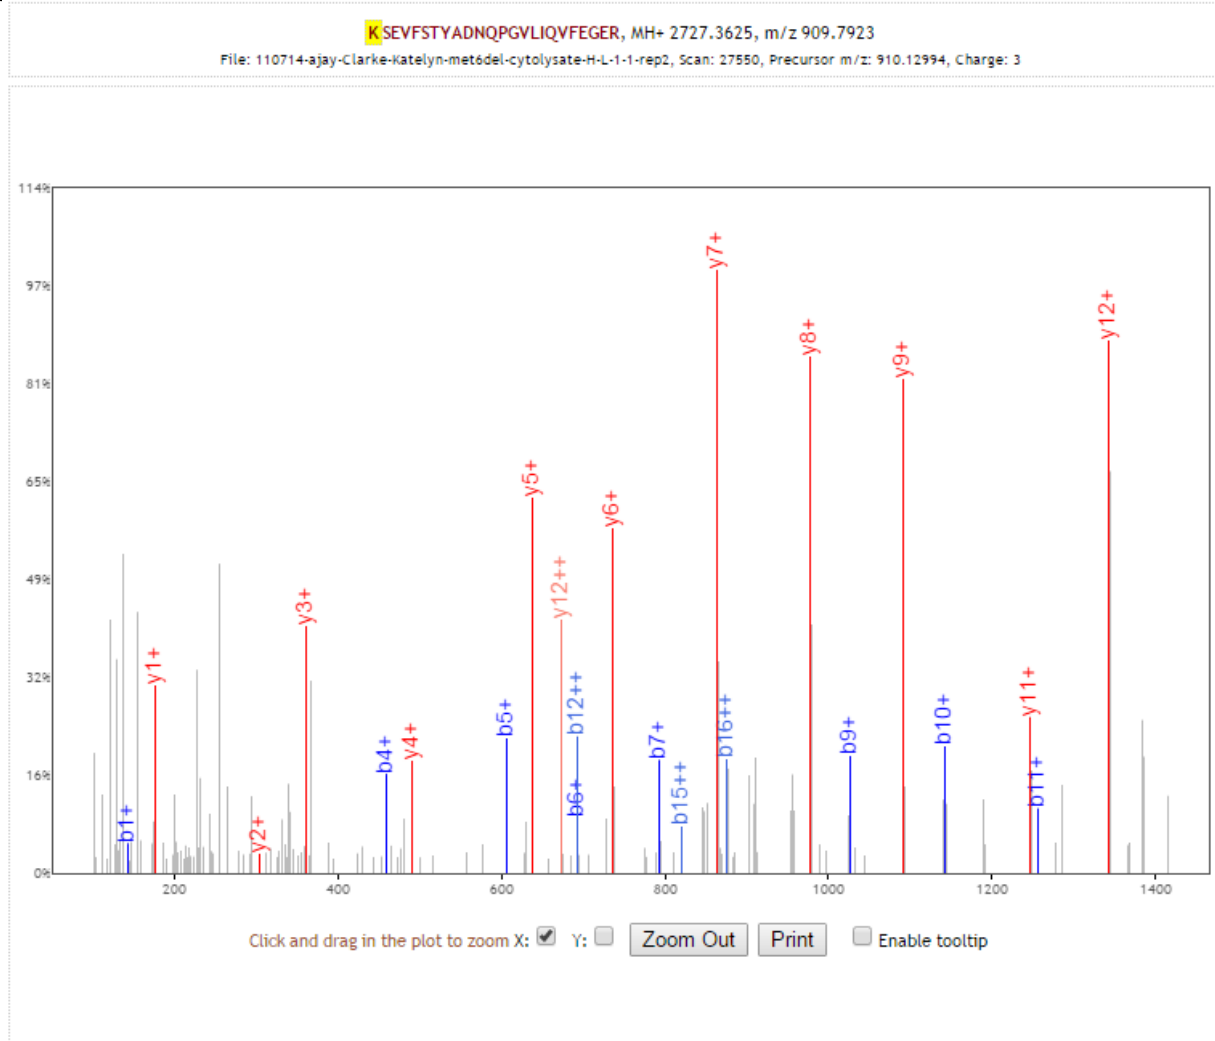

| b+        | b2+       | #  | Seq #       | y+               | y2+             |
|-----------|-----------|----|-------------|------------------|-----------------|
| 143.1179  | 72.0626   | 1  | <b>K</b> 24 |                  |                 |
| 230.1500  | 115.5786  | 2  | S 23        | 2585.2518        | 1293.1295       |
| 359.1926  | 180.0999  | 3  | E 22        | 2498.2198        | 1249.6135       |
| 458.2610  | 229.6341  | 4  | V 21        | 2369.1772        | 1185.0922       |
| 605.3294  | 303.1683  | 5  | F 20        | 2270.1088        | 1135.5580       |
| 692.3614  | 346.6843  | 6  | S 19        | 2123.0404        | 1062.0238       |
| 793.4091  | 397.2082  | 7  | T 18        | 2036.0083        | 1018.5078       |
| 956.4724  | 478.7399  | 8  | Y 17        | 1934.9607        | 967.9840        |
| 1027.5095 | 514.2584  | 9  | A 16        | 1771.8973        | 886.4523        |
| 1142.5365 | 571.7719  | 10 | D 15        | 1700.8602        | 850.9338        |
| 1256.5794 | 628.7933  | 11 | N 14        | 1585.8333        | 793.4203        |
| 1384.6380 | 692.8226  | 12 | Q 13        | 1471.7904        | 736.3988        |
| 1481.6907 | 741.3490  | 13 | P 12        | <b>1343.7318</b> | <b>672.3695</b> |
| 1538.7122 | 769.8597  | 14 | G 11        | <b>1246.6790</b> | 623.8431        |
| 1637.7806 | 819.3940  | 15 | V 10        | 1189.6575        | 595.3324        |
| 1750.8647 | 875.9360  | 16 | L 9         | <b>1090.5891</b> | 545.7982        |
| 1863.9488 | 932.4780  | 17 | I 8         | <b>977.5051</b>  | 489.2562        |
| 1992.0073 | 996.5073  | 18 | Q 7         | <b>864.4210</b>  | 432.7141        |
| 2091.0757 | 1046.0415 | 19 | V 6         | <b>736.3624</b>  | 368.6849        |
| 2238.1442 | 1119.5757 | 20 | F 5         | <b>637.2940</b>  | 319.1506        |
| 2367.1868 | 1184.0970 | 21 | E 4         | <b>490.2256</b>  | 245.6164        |
| 2424.2082 | 1212.6077 | 22 | G 3         | <b>361.1830</b>  | 181.0951        |
| 2553.2508 | 1277.1290 | 23 | E 2         | <b>304.1615</b>  | 152.5844        |
|           |           | 24 | R 1         | <b>175.1190</b>  | 88.0631         |

[\[Click\]](#) to move table  
 Static Modifications:  
 C: 57.02146  
 Variable Modifications:  
 K: 14.0157

# Ssa2

K.mono**K**SEVFSTYADNQPGLIQVFEGER.A [420, 443] (missed 1)

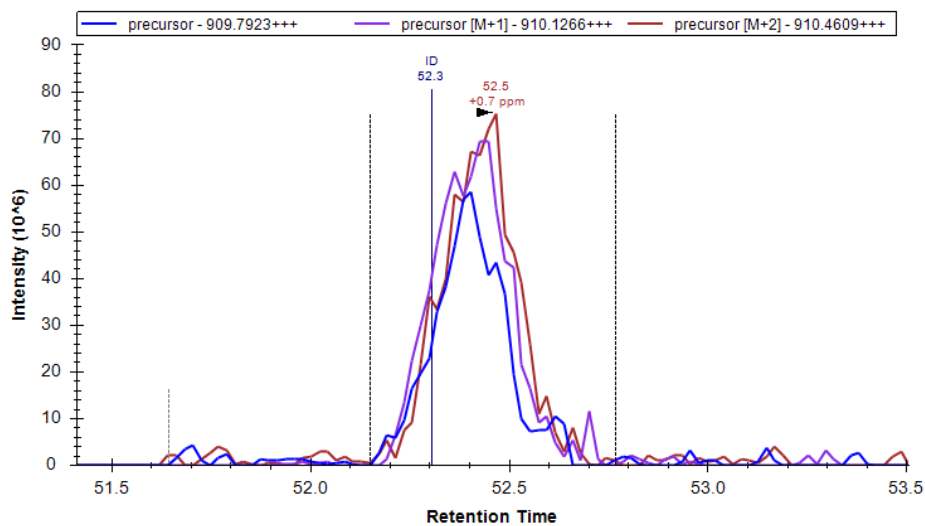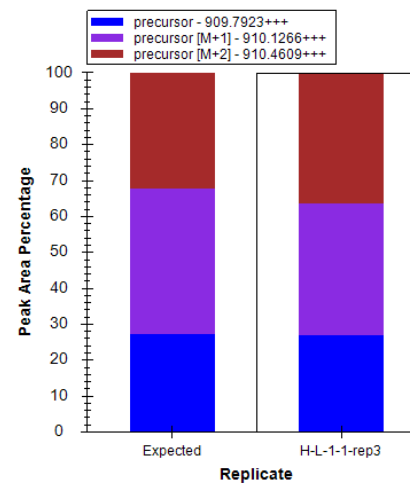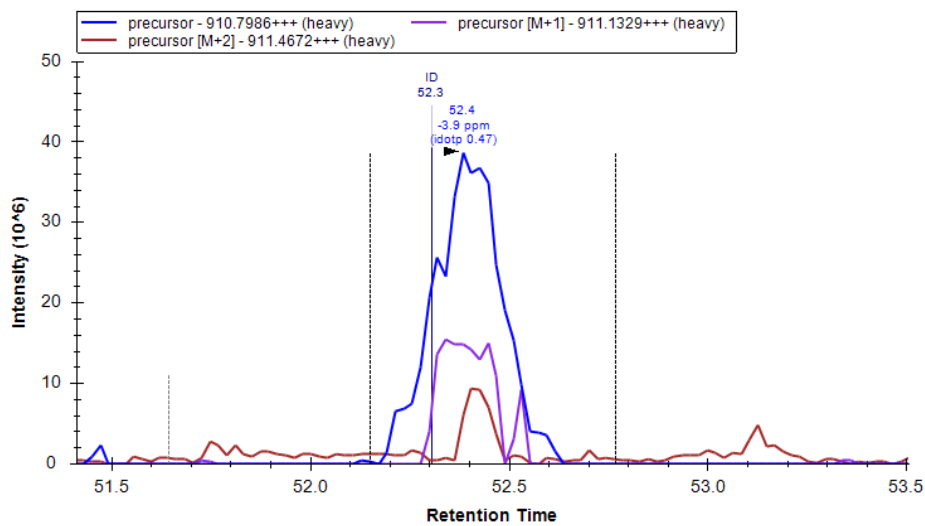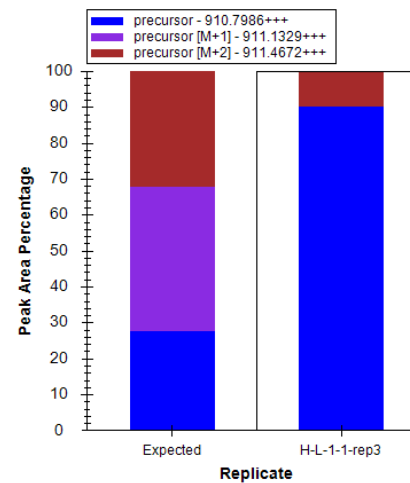

Replicate 3

# Ssa2

## K.mono**K**SEVFSTYADNQPGLVLIQVFEGE.R.A [420, 443] (missed 1)

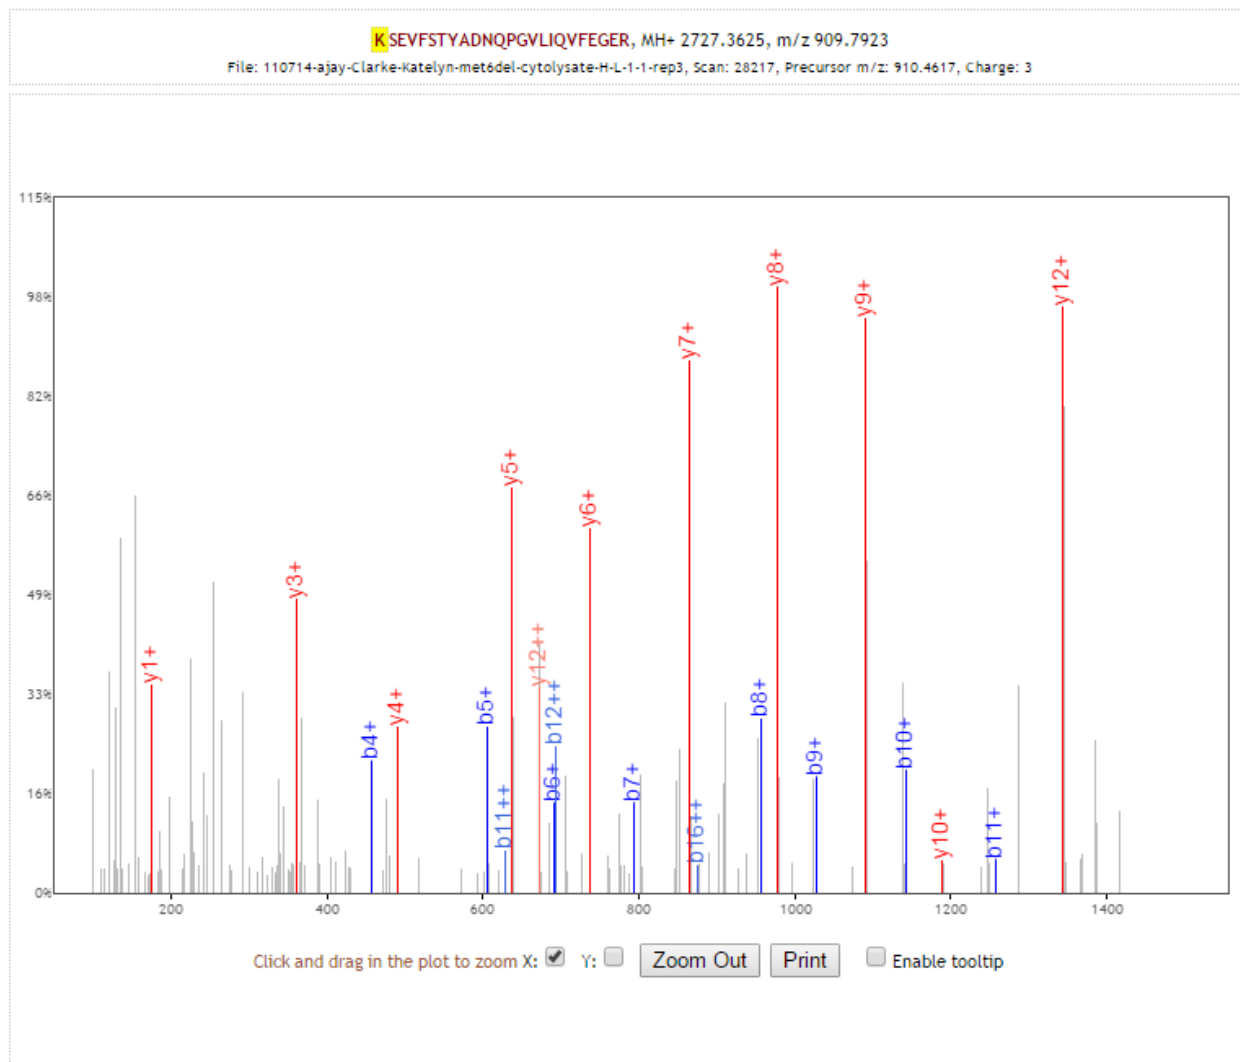

| b+               | b2+             | #  | Seq #       | y+               | y2+             |
|------------------|-----------------|----|-------------|------------------|-----------------|
| 143.1179         | 72.0626         | 1  | <b>K</b> 24 |                  |                 |
| 230.1500         | 115.5786        | 2  | S 23        | 2585.2518        | 1293.1295       |
| 359.1926         | 180.0999        | 3  | E 22        | 2498.2198        | 1249.6135       |
| <b>458.2610</b>  | 229.6341        | 4  | <b>V</b> 21 | 2369.1772        | 1185.0922       |
| <b>605.3294</b>  | 303.1683        | 5  | <b>F</b> 20 | 2270.1088        | 1135.5580       |
| <b>692.3614</b>  | 346.6843        | 6  | <b>S</b> 19 | 2123.0404        | 1062.0238       |
| <b>793.4091</b>  | 397.2082        | 7  | <b>T</b> 18 | 2036.0083        | 1018.5078       |
| <b>956.4724</b>  | 478.7399        | 8  | <b>Y</b> 17 | 1934.9607        | 967.9840        |
| <b>1027.5095</b> | 514.2584        | 9  | <b>A</b> 16 | 1771.8973        | 886.4523        |
| <b>1142.5365</b> | 571.7719        | 10 | <b>D</b> 15 | 1700.8602        | 850.9338        |
| <b>1256.5794</b> | <b>628.7933</b> | 11 | <b>N</b> 14 | 1585.8333        | 793.4203        |
| 1384.6380        | <b>692.8226</b> | 12 | <b>Q</b> 13 | 1471.7904        | 736.3988        |
| 1481.6907        | 741.3490        | 13 | <b>P</b> 12 | <b>1343.7318</b> | <b>672.3695</b> |
| 1538.7122        | 769.8597        | 14 | <b>G</b> 11 | 1246.6790        | 623.8431        |
| 1637.7806        | 819.3940        | 15 | <b>V</b> 10 | <b>1189.6575</b> | 595.3324        |
| 1750.8647        | <b>875.9360</b> | 16 | <b>L</b> 9  | <b>1090.5891</b> | 545.7982        |
| 1863.9488        | 932.4780        | 17 | <b>I</b> 8  | <b>977.5051</b>  | 489.2562        |
| 1992.0073        | 996.5073        | 18 | <b>Q</b> 7  | <b>864.4210</b>  | 432.7141        |
| 2091.0757        | 1046.0415       | 19 | <b>V</b> 6  | <b>736.3624</b>  | 368.6849        |
| 2238.1442        | 1119.5757       | 20 | <b>F</b> 5  | <b>637.2940</b>  | 319.1506        |
| 2367.1868        | 1184.0970       | 21 | <b>E</b> 4  | <b>490.2256</b>  | 245.6164        |
| 2424.2082        | 1212.6077       | 22 | <b>G</b> 3  | <b>361.1830</b>  | 181.0951        |
| 2553.2508        | 1277.1290       | 23 | <b>E</b> 2  | 304.1615         | 152.5844        |
|                  |                 | 24 | <b>R</b> 1  | <b>175.1190</b>  | 88.0631         |

[\[Click\]](#) to move table  
 Static Modifications:  
 C: 57.02146  
 Variable Modifications:  
 K: 14.0157

# Ded1

R.NSSNYNNNGGYNGGdi**R**GGGSFFSNNR.R [34, 60] (missed 1)

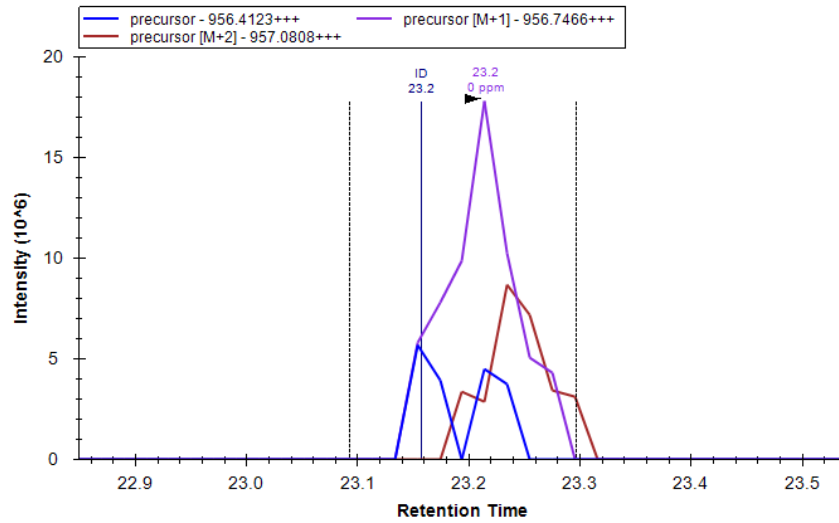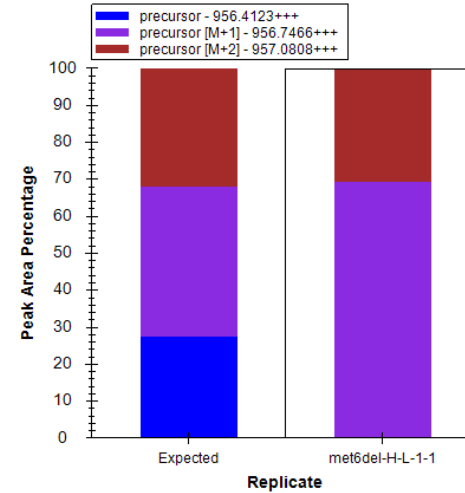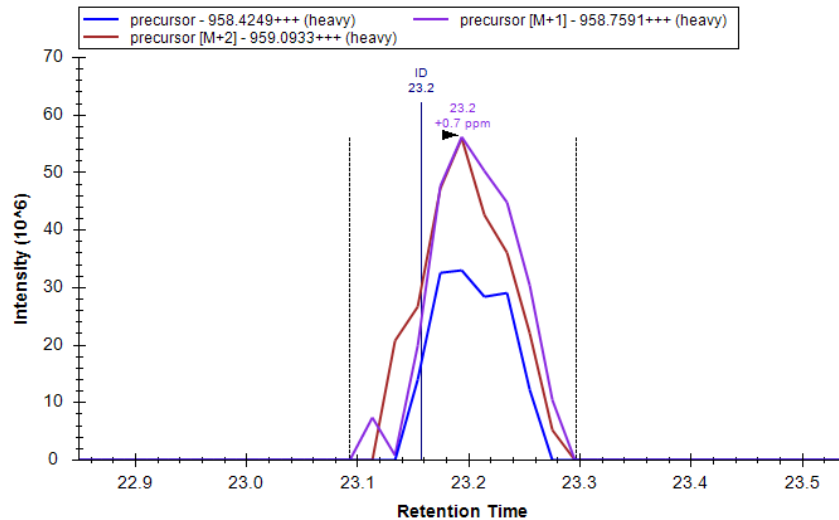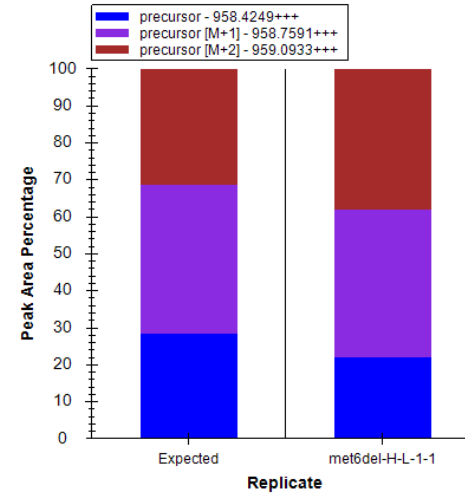

Replicate 1

# Ded1

## R.NSSNYNNNGGYNGGdi**R**GGGSFFSNNR.R [34, 60] (missed 1)

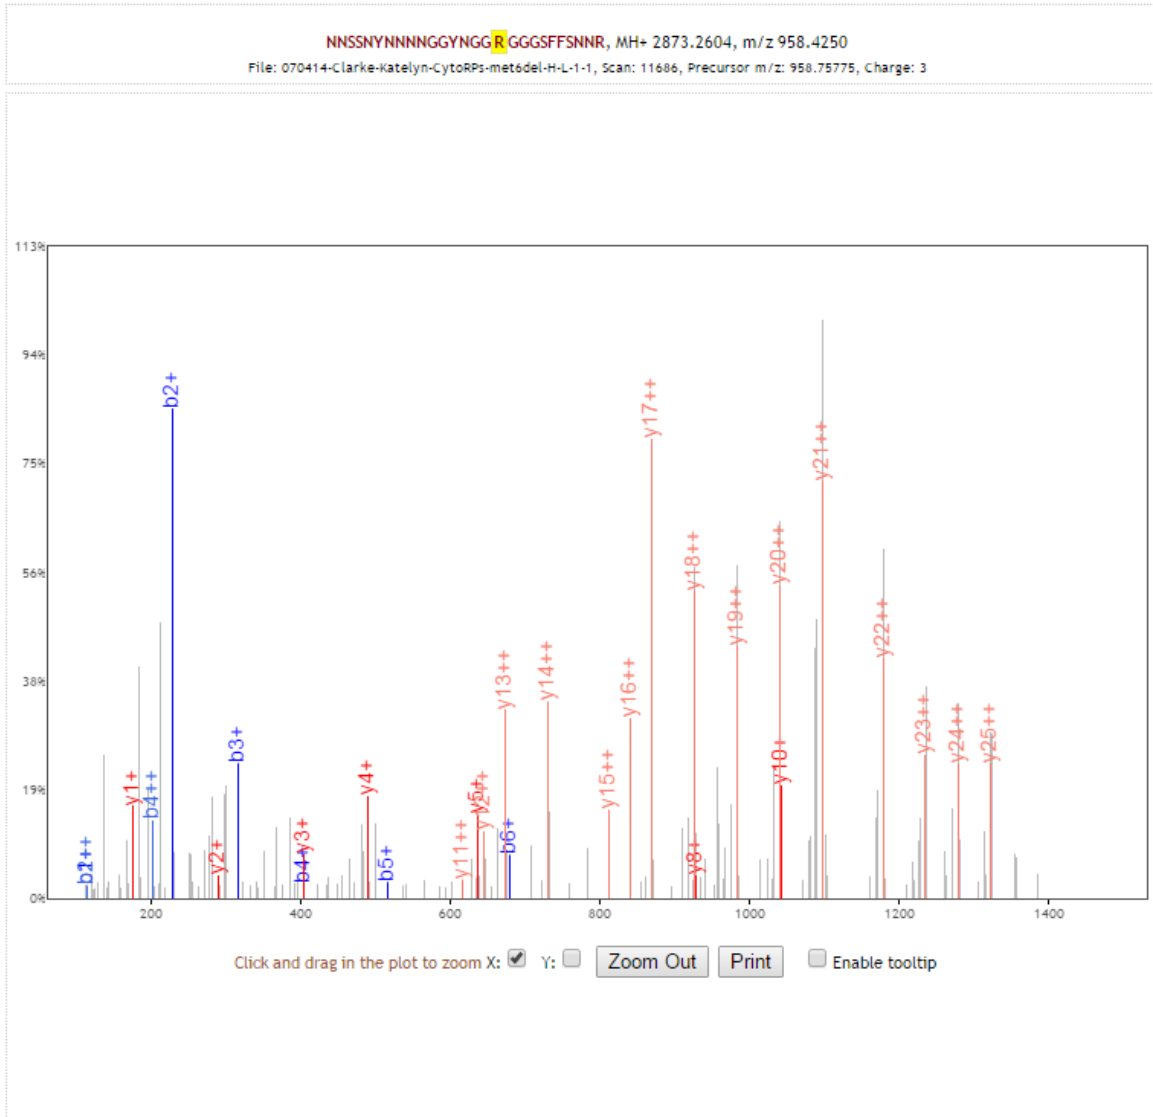

| b+        | b2+       | #  | Seq # | y+        | y2+       |
|-----------|-----------|----|-------|-----------|-----------|
| 115.0502  | 58.0287   | 1  | N 27  |           |           |
| 229.0931  | 115.0502  | 2  | N 26  | 2759.2175 | 1380.1124 |
| 316.1252  | 158.5662  | 3  | S 25  | 2645.1745 | 1323.0909 |
| 403.1572  | 202.0822  | 4  | S 24  | 2558.1425 | 1279.5749 |
| 517.2001  | 259.1037  | 5  | N 23  | 2471.1105 | 1236.0589 |
| 680.2634  | 340.6354  | 6  | Y 22  | 2357.0675 | 1179.0374 |
| 794.3064  | 397.6568  | 7  | N 21  | 2194.0042 | 1097.5057 |
| 908.3493  | 454.6783  | 8  | N 20  | 2079.9613 | 1040.4843 |
| 1022.3922 | 511.6998  | 9  | N 19  | 1965.9184 | 983.4628  |
| 1136.4352 | 568.7212  | 10 | N 18  | 1851.8754 | 926.4414  |
| 1193.4566 | 597.2319  | 11 | G 17  | 1737.8325 | 869.4199  |
| 1250.4781 | 625.7427  | 12 | G 16  | 1680.8110 | 840.9092  |
| 1413.5414 | 707.2743  | 13 | Y 15  | 1623.7896 | 812.3984  |
| 1527.5843 | 764.2958  | 14 | N 14  | 1460.7262 | 730.8668  |
| 1584.6058 | 792.8065  | 15 | G 13  | 1346.6833 | 673.8453  |
| 1641.6273 | 821.3173  | 16 | G 12  | 1289.6619 | 645.3346  |
| 1831.7976 | 916.4024  | 17 | R 11  | 1232.6404 | 616.8238  |
| 1888.8190 | 944.9132  | 18 | G 10  | 1042.4701 | 521.7387  |
| 1945.8405 | 973.4239  | 19 | G 9   | 985.4486  | 493.2279  |
| 2002.8620 | 1001.9346 | 20 | G 8   | 928.4272  | 464.7172  |
| 2089.8940 | 1045.4506 | 21 | S 7   | 871.4057  | 436.2065  |
| 2236.9624 | 1118.9848 | 22 | F 6   | 784.3737  | 392.6905  |
| 2384.0308 | 1192.5190 | 23 | F 5   | 637.3052  | 319.1563  |
| 2471.0629 | 1236.0351 | 24 | S 4   | 490.2368  | 245.6221  |
| 2585.1058 | 1293.0565 | 25 | N 3   | 403.2048  | 202.1060  |
| 2699.1487 | 1350.0780 | 26 | N 2   | 289.1619  | 145.0846  |
|           |           | 27 | R 1   | 175.1190  | 88.0631   |

[\[Click\]](#) to move table  
 Static Modifications:  
 C: 57.02146  
 M: 3.0189  
 Variable Modifications:  
 R: 34.0692
