# Supplementary material
Source: PubMed Central journal article supplement (PMC5148652)
Supplement: NIHMS820798-supplement-Supplementary_Figure_2.pdf [file NIHMS820798-supplement-Supplementary_Figure_2.pdf]

# Mitochondrial Ribosomal Fraction

MS1 Chromatograms and  
MS2 Fragmentation Patterns

# RPL23B

R.DGVFLYFEDNAGVIANPdi**KGEM**di**KGSAITGPVGK**.E [88, 119]  
(missed 2)

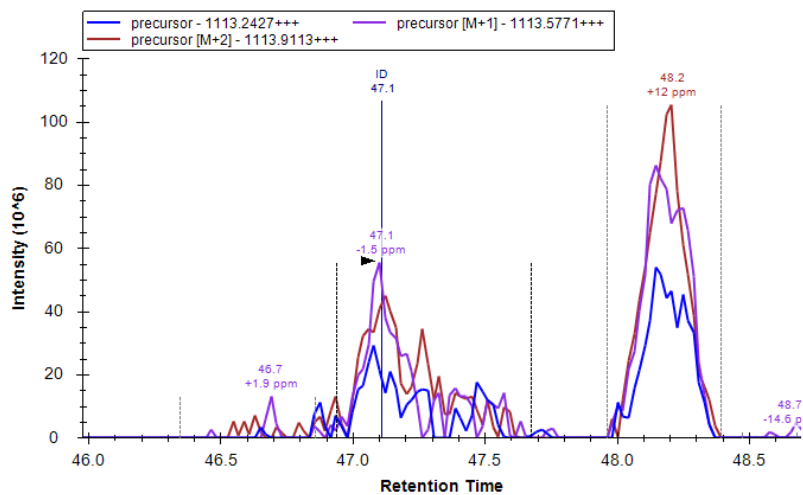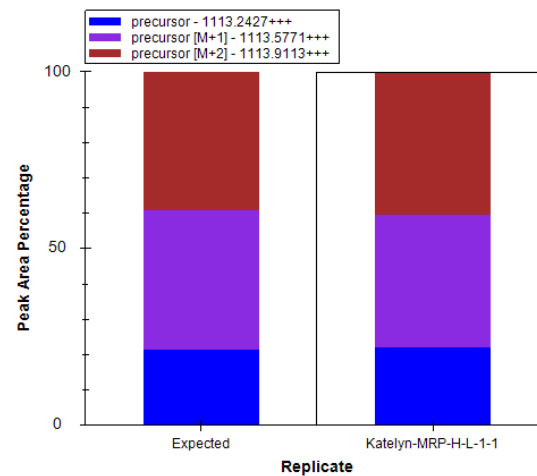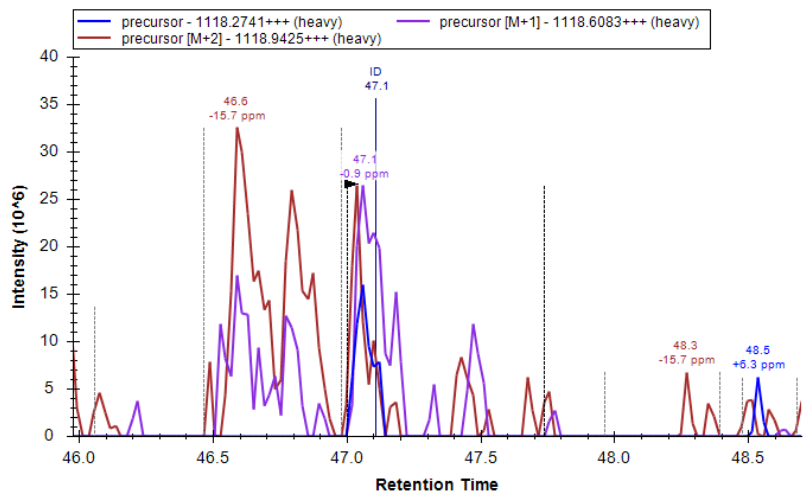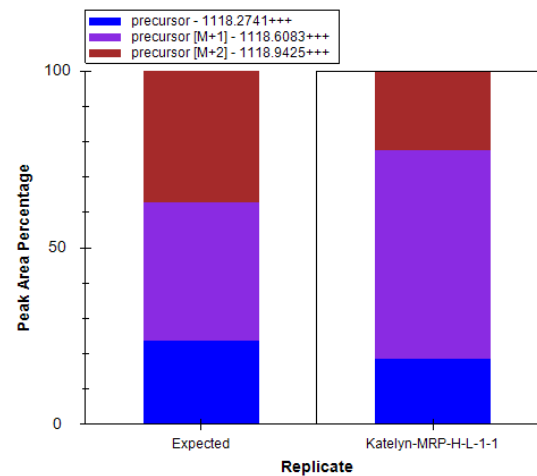

Replicate 2

# RPL23B

R.DGVFLYFEDNAGVIANPdi**K**GEMdi**K**GSAITGPVGK.E [88, 119]  
(missed 2)

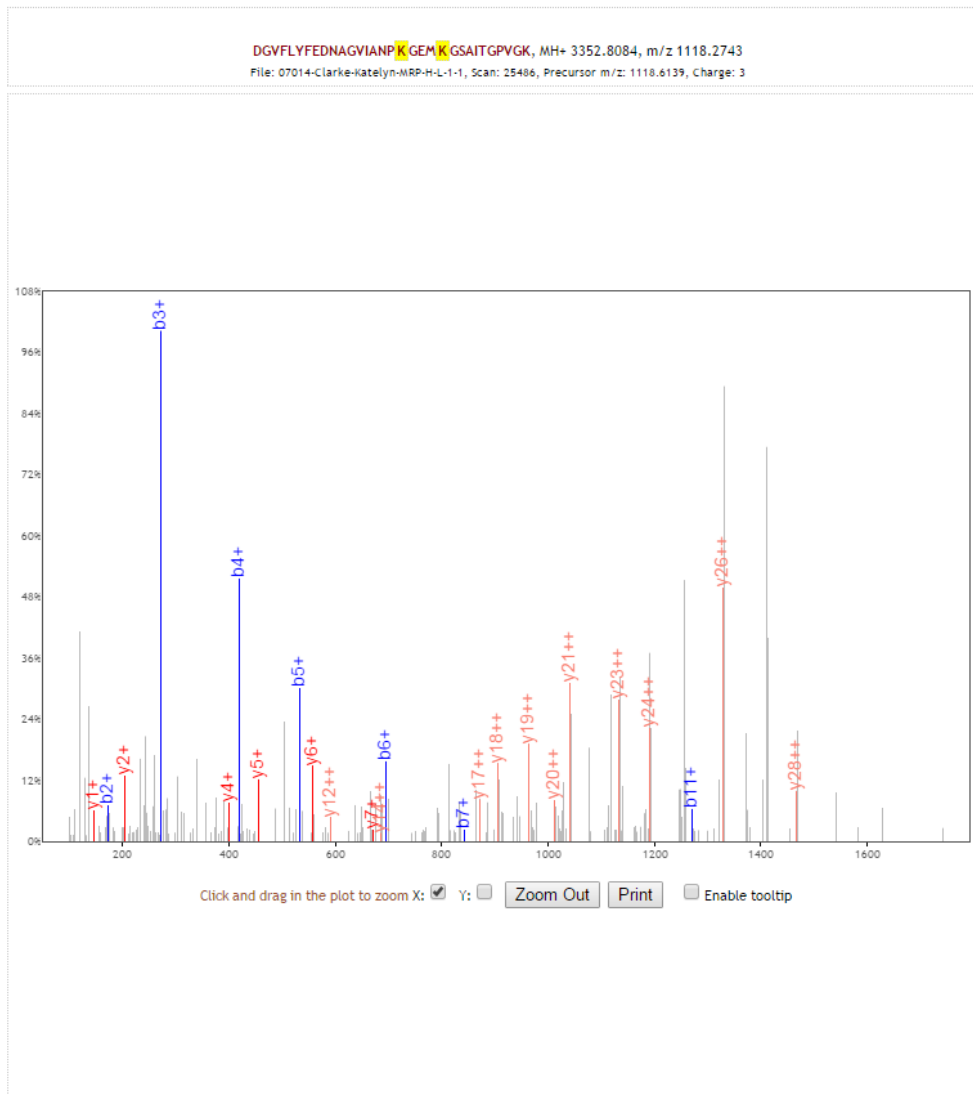

| b+        | b2+       | #  | Seq | #  | y+        | y2+       |
|-----------|-----------|----|-----|----|-----------|-----------|
| 116.0342  | 58.5207   | 1  | D   | 32 |           |           |
| 173.0557  | 87.0315   | 2  | G   | 31 | 3237.7814 | 1619.3944 |
| 272.1241  | 136.5657  | 3  | V   | 30 | 3180.7600 | 1590.8836 |
| 419.1925  | 210.0999  | 4  | F   | 29 | 3081.6916 | 1541.3494 |
| 532.2766  | 266.6419  | 5  | L   | 28 | 2934.6232 | 1467.8152 |
| 695.3399  | 348.1736  | 6  | Y   | 27 | 2821.5391 | 1411.2732 |
| 842.4083  | 421.7078  | 7  | F   | 26 | 2658.4758 | 1329.7415 |
| 971.4509  | 486.2291  | 8  | E   | 25 | 2511.4073 | 1256.2073 |
| 1086.4779 | 543.7426  | 9  | D   | 24 | 2382.3648 | 1191.6860 |
| 1200.5208 | 600.7640  | 10 | N   | 23 | 2267.3378 | 1134.1725 |
| 1271.5579 | 636.2826  | 11 | A   | 22 | 2153.2949 | 1077.1511 |
| 1328.5794 | 664.7933  | 12 | G   | 21 | 2082.2578 | 1041.6325 |
| 1427.6478 | 714.3275  | 13 | V   | 20 | 2025.2363 | 1013.1218 |
| 1540.7318 | 770.8696  | 14 | I   | 19 | 1926.1679 | 963.5876  |
| 1611.7690 | 806.3881  | 15 | A   | 18 | 1813.0838 | 907.0456  |
| 1725.8119 | 863.4096  | 16 | N   | 17 | 1742.0467 | 871.5270  |
| 1822.8646 | 911.9360  | 17 | P   | 16 | 1628.0038 | 814.5055  |
| 1985.0288 | 993.0180  | 18 | K   | 15 | 1530.9510 | 765.9792  |
| 2042.0503 | 1021.5288 | 19 | G   | 14 | 1368.7869 | 684.8971  |
| 2171.0929 | 1086.0501 | 20 | E   | 13 | 1311.7654 | 656.3863  |
| 2305.1522 | 1153.0798 | 21 | M   | 12 | 1182.7228 | 591.8650  |
| 2467.3164 | 1234.1618 | 22 | K   | 11 | 1048.6634 | 524.8353  |
| 2524.3379 | 1262.6726 | 23 | G   | 10 | 886.4993  | 443.7533  |
| 2611.3699 | 1306.1886 | 24 | S   | 9  | 829.4778  | 415.2425  |
| 2682.4070 | 1341.7071 | 25 | A   | 8  | 742.4458  | 371.7265  |
| 2795.4911 | 1398.2492 | 26 | I   | 7  | 671.4087  | 336.2080  |
| 2896.5388 | 1448.7730 | 27 | T   | 6  | 558.3246  | 279.6659  |
| 2953.5602 | 1477.2837 | 28 | G   | 5  | 457.2769  | 229.1421  |
| 3050.6130 | 1525.8101 | 29 | P   | 4  | 400.2554  | 200.6314  |
| 3149.6814 | 1575.3443 | 30 | V   | 3  | 303.2027  | 152.1050  |
| 3206.7029 | 1603.8551 | 31 | G   | 2  | 204.1343  | 102.5708  |
|           |           | 32 | K   | 1  | 147.1128  | 74.0600   |

[\[click\]](#) to move table  
Static Modifications:  
C: 57.02146  
M: 3.0189  
Variable Modifications:  
K: 34.0692

Replicate 2

# RPL23B

## R.DGVFLYFEDNAGVIANPdiKGEMdiKGSAITGPVGK.E [88, 119]

### (missed 2)

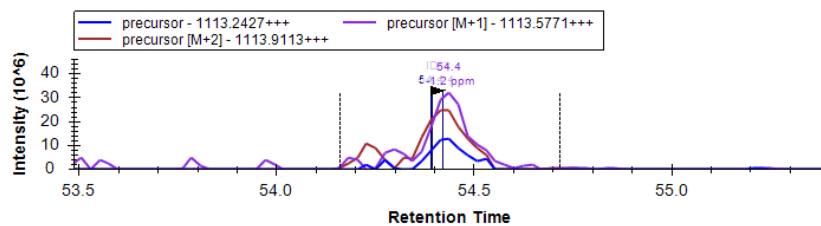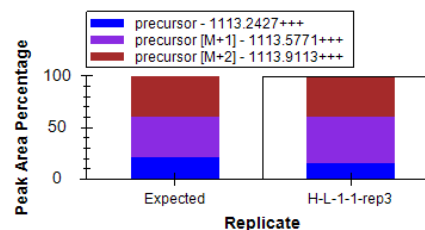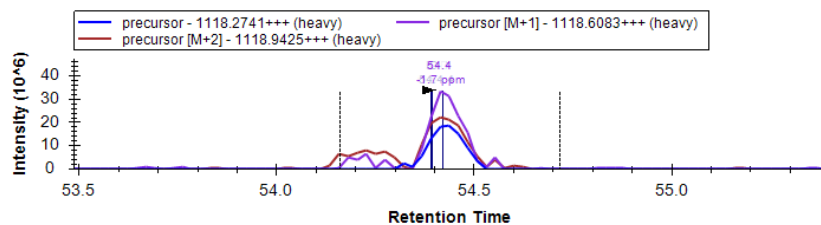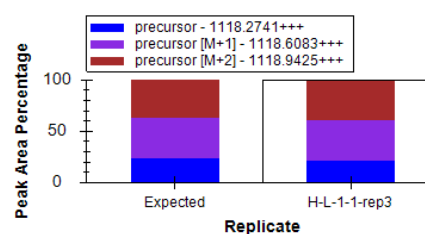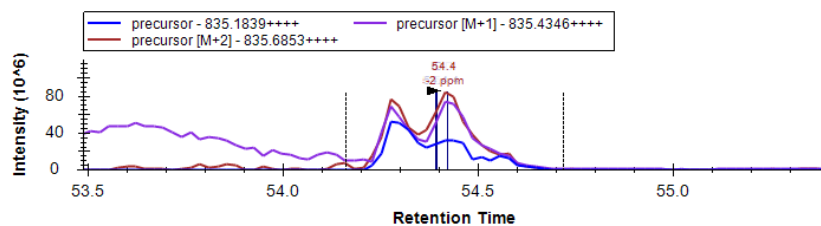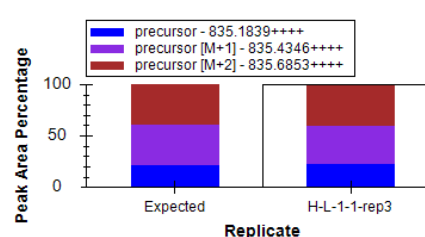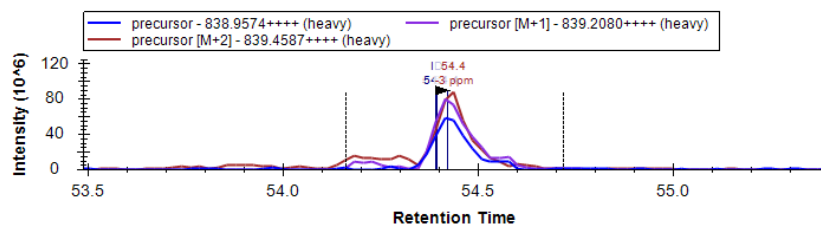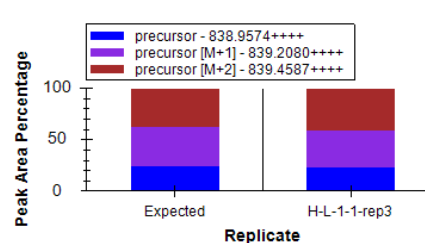

Replicate 3

# RPL23B

## R.DGVFLYFEDNAGVIANPdi**K**GEMdi**K**GSAITGPVGK.E [88, 119] (missed 2)

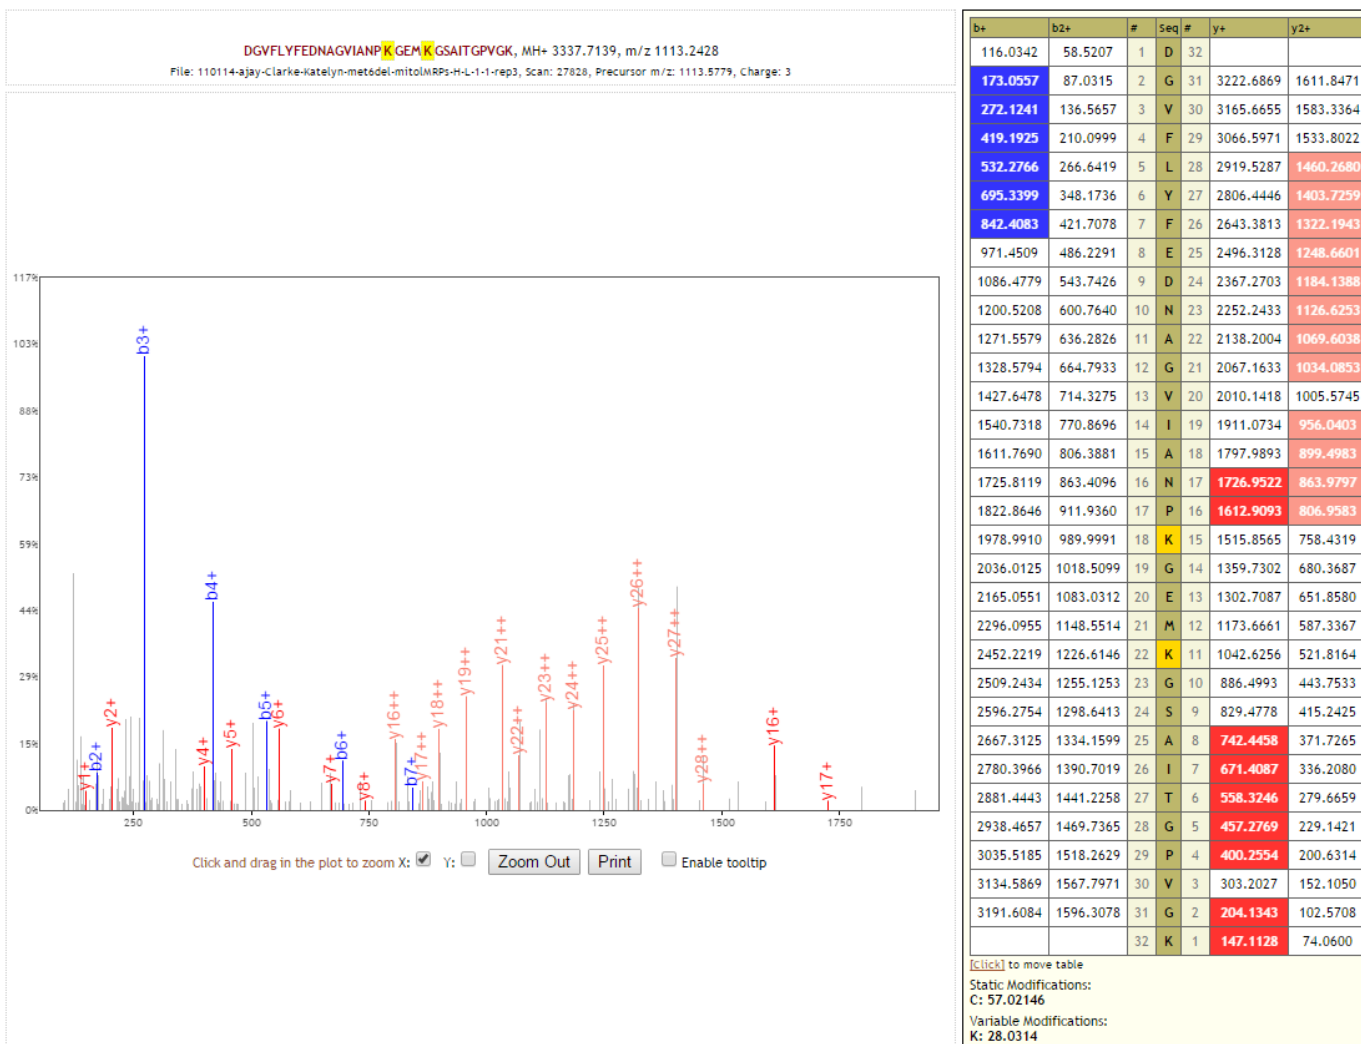

Replicate 3

# RPL23B

R.DGVFLYFEDNAGVIANPdi**K**GEMdi**K**GSAITGPVGK.E [88, 119]  
(missed 2)

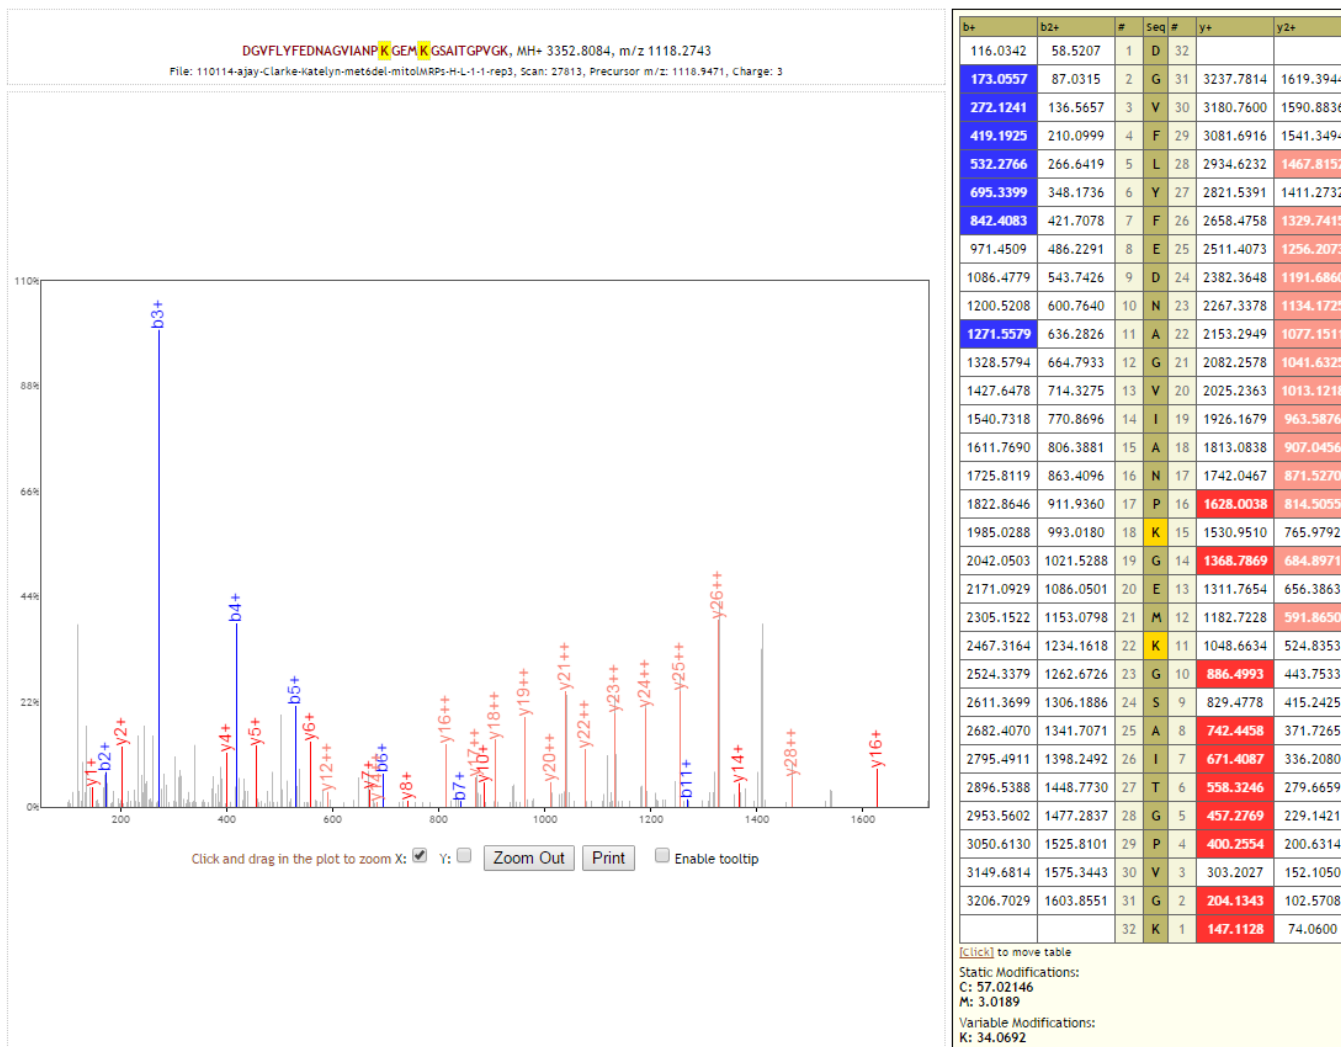

# RPL23B

R.DGVFLYFEDNAGVIANPdi**KGEM**di**KGSAITGPV**GK.E [88, 119]

(missed 2)

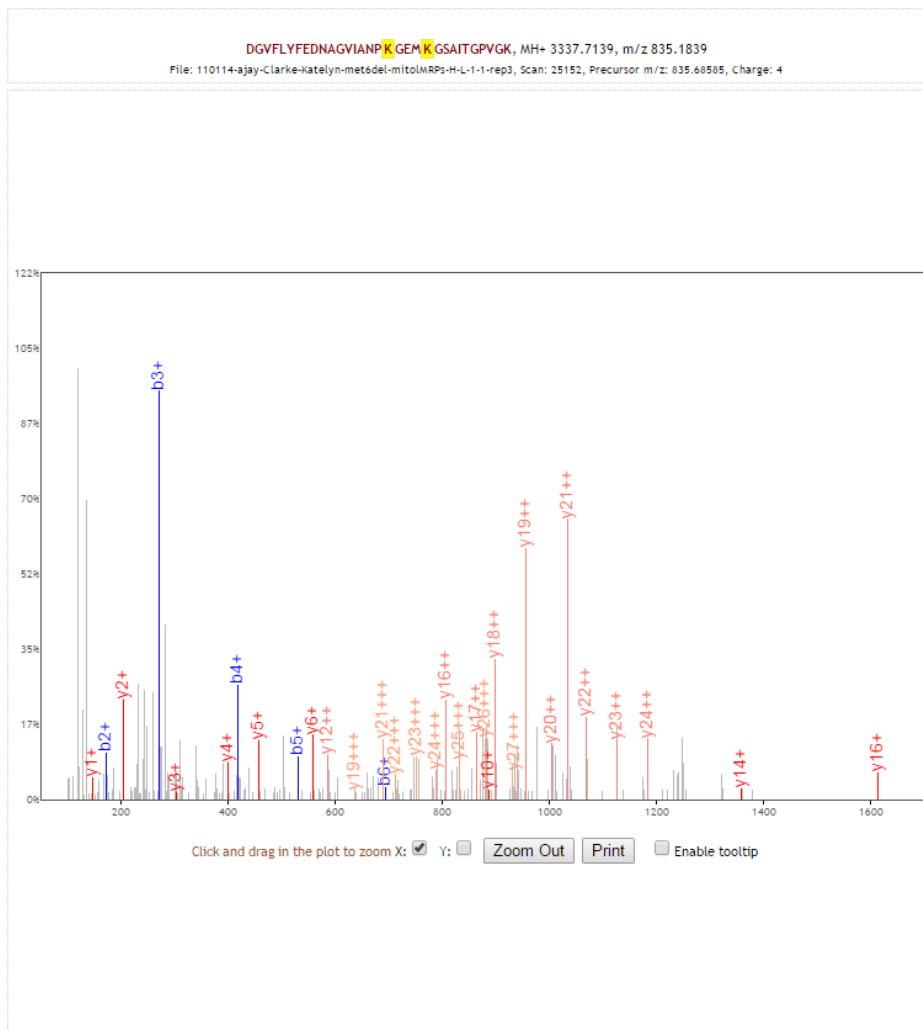

| b+        | b2+       | b3+       | #  | Seq # | y+        | y2+       | y3+       |
|-----------|-----------|-----------|----|-------|-----------|-----------|-----------|
| 116.0342  | 58.5207   | 39.3496   | 1  | D 32  |           |           |           |
| 173.0557  | 87.0315   | 58.3567   | 2  | G 31  | 3222.6869 | 1611.8471 | 1074.9005 |
| 272.1241  | 136.5657  | 91.3795   | 3  | V 30  | 3165.6655 | 1583.3364 | 1055.8933 |
| 419.1925  | 210.0999  | 140.4024  | 4  | F 29  | 3066.5971 | 1533.8022 | 1022.8705 |
| 532.2766  | 266.6419  | 178.0970  | 5  | L 28  | 2919.5287 | 1460.2680 | 973.8477  |
| 695.3399  | 348.1736  | 232.4515  | 6  | Y 27  | 2806.4446 | 1403.7259 | 936.1530  |
| 842.4083  | 421.7078  | 281.4743  | 7  | F 26  | 2643.3813 | 1322.1943 | 881.7986  |
| 971.4509  | 486.2291  | 324.4885  | 8  | E 25  | 2496.3128 | 1248.6601 | 832.7758  |
| 1086.4779 | 543.7426  | 362.8308  | 9  | D 24  | 2367.2703 | 1184.1388 | 789.7616  |
| 1200.5208 | 600.7640  | 400.8451  | 10 | N 23  | 2252.2433 | 1126.6253 | 751.4193  |
| 1271.5579 | 636.2826  | 424.5241  | 11 | A 22  | 2138.2004 | 1069.6038 | 713.4050  |
| 1328.5794 | 664.7933  | 443.5313  | 12 | G 21  | 2067.1633 | 1034.0853 | 689.7259  |
| 1427.6478 | 714.3275  | 476.5541  | 13 | V 20  | 2010.1418 | 1005.5745 | 670.7188  |
| 1540.7318 | 770.8696  | 514.2488  | 14 | I 19  | 1911.0734 | 956.0403  | 637.6960  |
| 1611.7690 | 806.3881  | 537.9278  | 15 | A 18  | 1797.9893 | 899.4983  | 600.0013  |
| 1725.8119 | 863.4096  | 575.9421  | 16 | N 17  | 1726.9522 | 863.9797  | 576.3223  |
| 1822.8646 | 911.9360  | 608.2931  | 17 | P 16  | 1612.9093 | 806.9583  | 538.3079  |
| 1978.9910 | 989.9991  | 660.3352  | 18 | K 15  | 1515.8565 | 758.4319  | 505.9570  |
| 2036.0125 | 1018.5099 | 679.3423  | 19 | G 14  | 1359.7302 | 680.3687  | 453.9149  |
| 2165.0551 | 1083.0312 | 722.3565  | 20 | E 13  | 1302.7087 | 651.8580  | 434.9078  |
| 2296.0955 | 1148.5514 | 766.0367  | 21 | M 12  | 1173.6661 | 587.3367  | 391.8936  |
| 2452.2219 | 1226.6146 | 818.0788  | 22 | K 11  | 1042.6256 | 521.8164  | 348.2134  |
| 2509.2434 | 1255.1253 | 837.0860  | 23 | G 10  | 886.4993  | 443.7533  | 296.1713  |
| 2596.2754 | 1298.6413 | 866.0967  | 24 | S 9   | 829.4778  | 415.2425  | 277.1641  |
| 2667.3125 | 1334.1599 | 889.7757  | 25 | A 8   | 742.4458  | 371.7265  | 248.1534  |
| 2780.3966 | 1390.7019 | 927.4704  | 26 | I 7   | 671.4087  | 336.2080  | 224.4744  |
| 2881.4443 | 1441.2258 | 961.1529  | 27 | T 6   | 558.3246  | 279.6659  | 186.7797  |
| 2938.4657 | 1469.7365 | 980.1601  | 28 | G 5   | 457.2769  | 229.1421  | 153.0972  |
| 3035.5185 | 1518.2629 | 1012.5110 | 29 | P 4   | 400.2554  | 200.6314  | 134.0900  |
| 3134.5869 | 1567.7971 | 1045.5338 | 30 | V 3   | 303.2027  | 152.1050  | 101.7391  |
| 3191.6084 | 1596.3078 | 1064.5410 | 31 | G 2   | 204.1343  | 102.5708  | 68.7163   |
|           |           |           | 32 | K 1   | 147.1128  | 74.0600   | 49.7091   |

[Click](#) to move table  
 Static Modifications:  
 C: 57.02146  
 Variable Modifications:  
 K: 28.0314

# RPL23B

R.RRDGVFLYFEDNAGVIANPdi**KGEM**di**KGSAITGPVGK**.E [86, 119] (missed 3)

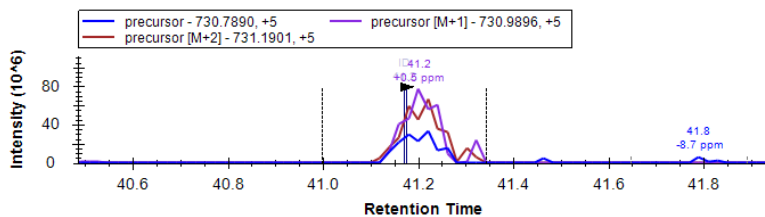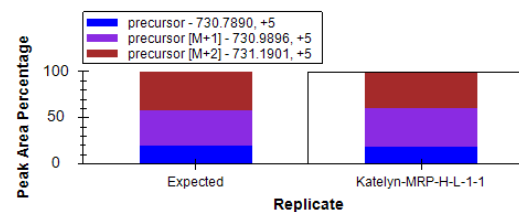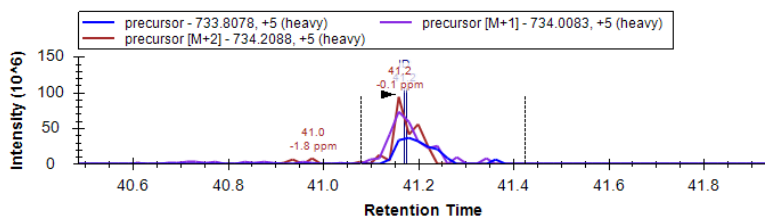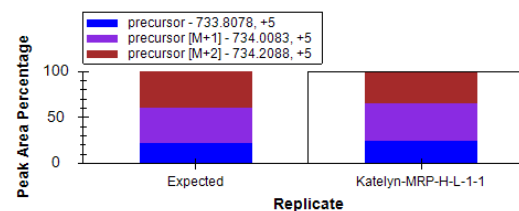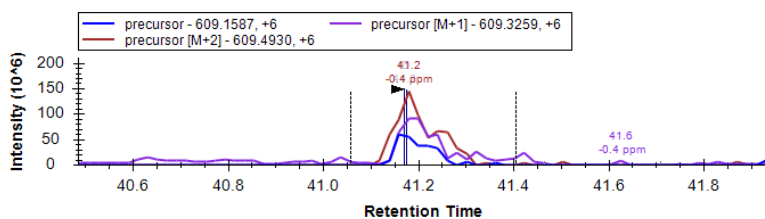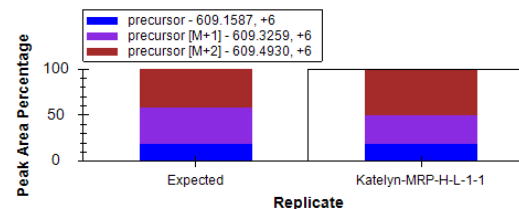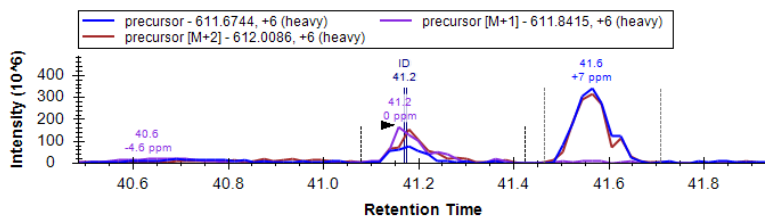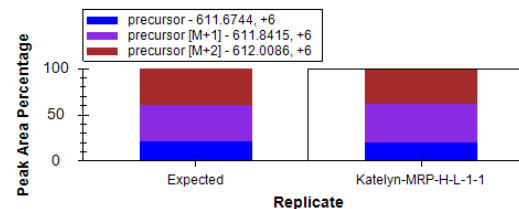

Replicate 2



# RPL23B

R.RRDGVFLYFEDNAGVIANPdi**KGEM**di**KGSAITGPV**GK.E [86, 119] (missed 3)

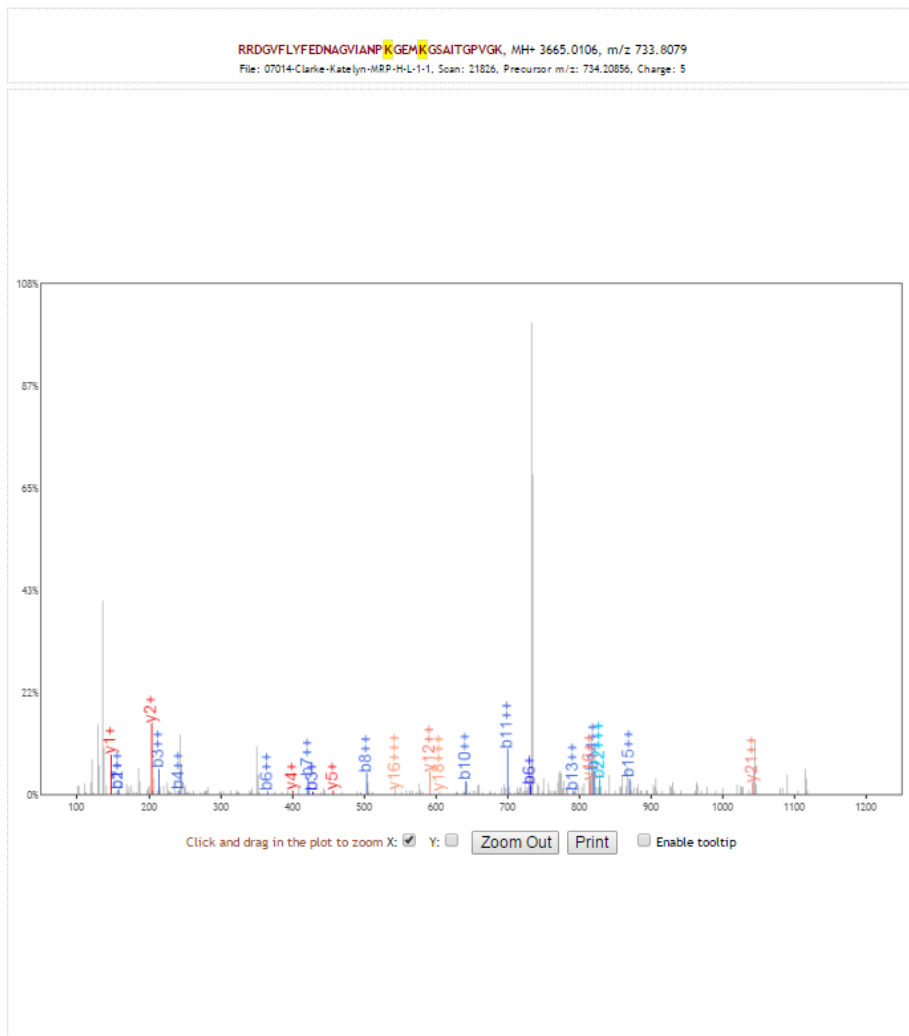

| b-        | b2+       | b3+       | #  | Seq | #  | y-        | y2+       | y3+       |
|-----------|-----------|-----------|----|-----|----|-----------|-----------|-----------|
| 157.1084  | 79.0578   | 53.0410   | 1  | R   | 34 |           |           |           |
| 313.2095  | 157.1084  | 105.0747  | 2  | R   | 33 | 3508.9095 | 1754.9584 | 1170.3080 |
| 428.2364  | 214.6219  | 143.4170  | 3  | D   | 32 | 3352.8084 | 1676.9078 | 1118.2743 |
| 485.2579  | 243.1326  | 162.4242  | 4  | G   | 31 | 3237.7814 | 1619.3944 | 1079.9320 |
| 584.3263  | 292.6668  | 195.4470  | 5  | V   | 30 | 3180.7600 | 1590.8836 | 1060.9248 |
| 731.3947  | 366.2010  | 244.4698  | 6  | F   | 29 | 3081.6916 | 1541.3494 | 1027.9020 |
| 844.4788  | 422.7430  | 282.1644  | 7  | L   | 28 | 2934.6232 | 1467.8152 | 978.8792  |
| 1007.5421 | 504.2747  | 336.5189  | 8  | Y   | 27 | 2821.5391 | 1411.2732 | 941.1845  |
| 1154.6105 | 577.8089  | 385.5417  | 9  | F   | 26 | 2658.4758 | 1329.7415 | 886.8301  |
| 1283.6531 | 642.3302  | 428.5559  | 10 | E   | 25 | 2511.4073 | 1256.2073 | 837.8073  |
| 1398.6801 | 699.8437  | 466.8982  | 11 | D   | 24 | 2382.3648 | 1191.6860 | 794.7931  |
| 1512.7230 | 756.8651  | 504.9125  | 12 | N   | 23 | 2267.3378 | 1134.1725 | 756.4508  |
| 1583.7601 | 792.3837  | 528.5916  | 13 | A   | 22 | 2153.2949 | 1077.1511 | 718.4365  |
| 1640.7816 | 820.8944  | 547.5987  | 14 | G   | 21 | 2082.2578 | 1041.6325 | 694.7574  |
| 1739.8500 | 870.4286  | 580.6215  | 15 | V   | 20 | 2025.2363 | 1013.1218 | 675.7503  |
| 1852.9341 | 926.9707  | 618.3162  | 16 | I   | 19 | 1926.1679 | 963.5876  | 642.7275  |
| 1923.9712 | 962.4892  | 641.9952  | 17 | A   | 18 | 1813.0838 | 907.0456  | 605.0328  |
| 2038.0141 | 1019.5107 | 680.0096  | 18 | N   | 17 | 1742.0467 | 871.5270  | 581.3538  |
| 2135.0669 | 1068.0371 | 712.3605  | 19 | P   | 16 | 1628.0038 | 814.5055  | 543.3394  |
| 2297.2310 | 1149.1192 | 766.4152  | 20 | K   | 15 | 1530.9510 | 765.9792  | 510.9885  |
| 2354.2525 | 1177.6299 | 785.4223  | 21 | G   | 14 | 1368.7869 | 684.8971  | 456.9338  |
| 2483.2951 | 1242.1512 | 828.4365  | 22 | E   | 13 | 1311.7654 | 656.3863  | 437.9267  |
| 2617.3545 | 1309.1809 | 873.1230  | 23 | H   | 12 | 1182.7228 | 591.8650  | 394.9125  |
| 2779.5186 | 1390.2630 | 927.1777  | 24 | K   | 11 | 1048.6634 | 524.8353  | 350.2260  |
| 2836.5401 | 1418.7737 | 946.1849  | 25 | G   | 10 | 886.4993  | 443.7533  | 296.1713  |
| 2923.5721 | 1462.2897 | 975.1956  | 26 | S   | 9  | 829.4778  | 415.2425  | 277.1641  |
| 2994.6092 | 1497.8083 | 998.8746  | 27 | A   | 8  | 742.4458  | 371.7265  | 248.1534  |
| 3107.6933 | 1554.3503 | 1036.5693 | 28 | I   | 7  | 671.4087  | 336.2080  | 224.4744  |
| 3208.7410 | 1604.8741 | 1070.2518 | 29 | T   | 6  | 558.3246  | 279.6659  | 186.7797  |
| 3265.7624 | 1633.3849 | 1089.2590 | 30 | G   | 5  | 457.2769  | 229.1421  | 153.0972  |
| 3362.8152 | 1681.9112 | 1121.6099 | 31 | P   | 4  | 400.2554  | 200.6314  | 134.0900  |
| 3461.8836 | 1731.4454 | 1154.6327 | 32 | V   | 3  | 303.2027  | 152.1050  | 101.7391  |
| 3518.9051 | 1759.9562 | 1173.6399 | 33 | G   | 2  | 204.1343  | 102.5708  | 68.7163   |
|           |           |           | 34 | K   | 1  | 147.1128  | 74.0600   | 49.7091   |

[Click](#) to move table

Static Modifications:  
 C: 57.02146  
 M: 3.0189

Variable Modifications:  
 K: 34.0692

# RPL23B

## R.RRDGVFLYFEDNAGVIANPdi**K**GEMdi**K**GSAITGPVVGK.E [86, 119] (missed 3)

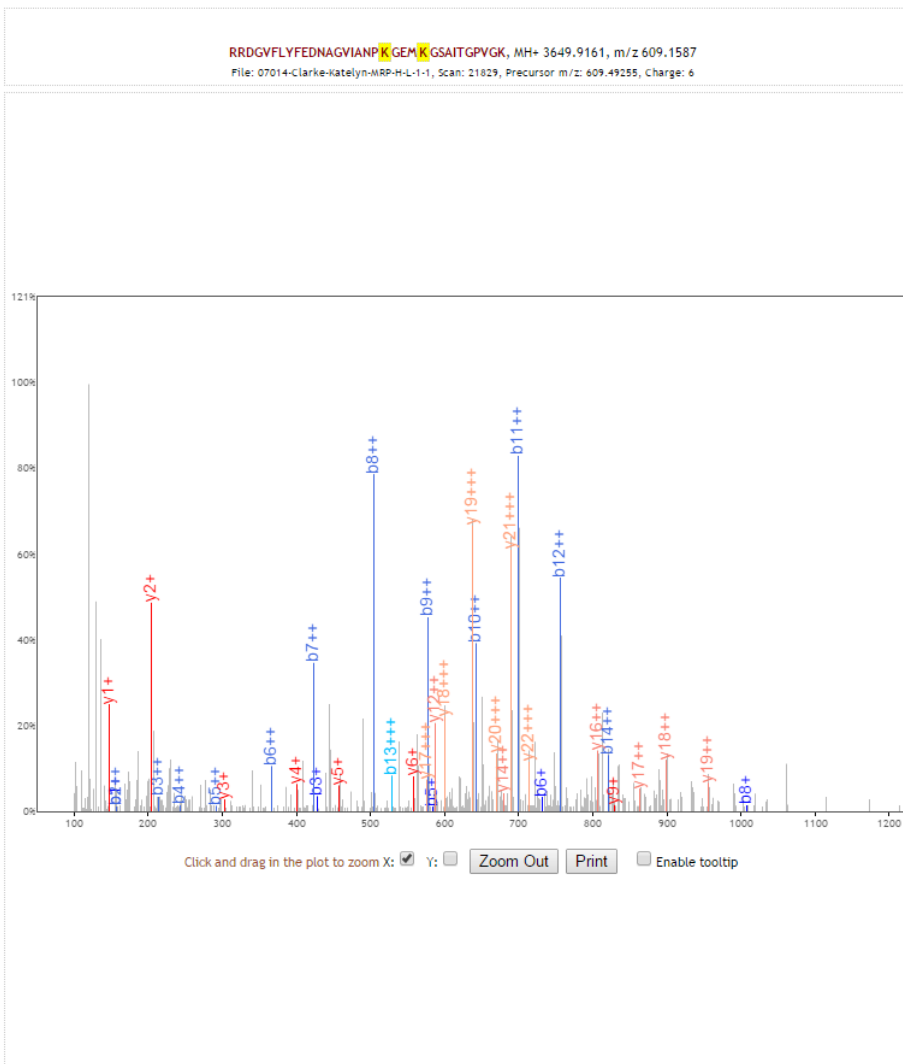

| b+        | b2+       | b3+       | #  | Seq | #  | y+        | y2+       | y3+       |
|-----------|-----------|-----------|----|-----|----|-----------|-----------|-----------|
| 157.1084  | 79.0578   | 53.0410   | 1  | R   | 34 |           |           |           |
| 313.2095  | 157.1084  | 105.0747  | 2  | R   | 33 | 3493.8150 | 1747.4111 | 1165.2765 |
| 428.2364  | 214.6219  | 143.4170  | 3  | D   | 32 | 3337.7139 | 1669.3606 | 1113.2428 |
| 485.2579  | 243.1326  | 162.4242  | 4  | G   | 31 | 3222.6869 | 1611.8471 | 1074.9005 |
| 584.3263  | 292.6668  | 195.4470  | 5  | V   | 30 | 3165.6655 | 1583.3364 | 1055.8933 |
| 731.3947  | 366.2010  | 244.4698  | 6  | F   | 29 | 3066.5971 | 1533.8022 | 1022.8705 |
| 844.4788  | 422.7430  | 282.1644  | 7  | L   | 28 | 2919.5287 | 1460.2680 | 973.8477  |
| 1007.5421 | 504.2747  | 336.5189  | 8  | Y   | 27 | 2806.4446 | 1403.7259 | 936.1530  |
| 1154.6105 | 577.8089  | 385.5417  | 9  | F   | 26 | 2643.3813 | 1322.1943 | 881.7986  |
| 1283.6531 | 642.3302  | 428.5559  | 10 | E   | 25 | 2496.3128 | 1248.6601 | 832.7758  |
| 1398.6801 | 699.8437  | 466.8982  | 11 | D   | 24 | 2367.2703 | 1184.1388 | 789.7616  |
| 1512.7230 | 756.8651  | 504.9125  | 12 | N   | 23 | 2252.2433 | 1126.6253 | 751.4193  |
| 1583.7601 | 792.3837  | 528.5916  | 13 | A   | 22 | 2138.2004 | 1069.6038 | 713.4050  |
| 1640.7816 | 820.8944  | 547.5987  | 14 | G   | 21 | 2067.1633 | 1034.0853 | 689.7259  |
| 1739.8500 | 870.4286  | 580.6215  | 15 | V   | 20 | 2010.1418 | 1005.5745 | 670.7188  |
| 1852.9341 | 926.9707  | 618.3162  | 16 | I   | 19 | 1911.0734 | 956.0403  | 637.6960  |
| 1923.9712 | 962.4892  | 641.9952  | 17 | A   | 18 | 1797.9893 | 899.4983  | 600.0013  |
| 2038.0141 | 1019.5107 | 680.0096  | 18 | N   | 17 | 1726.9522 | 863.9797  | 576.3223  |
| 2135.0669 | 1068.0371 | 712.3605  | 19 | P   | 16 | 1612.9093 | 806.9583  | 538.3079  |
| 2291.1932 | 1146.1003 | 764.4026  | 20 | K   | 15 | 1515.8565 | 758.4319  | 505.9570  |
| 2348.2147 | 1174.6110 | 783.4097  | 21 | G   | 14 | 1359.7302 | 680.3687  | 453.9149  |
| 2477.2573 | 1239.1323 | 826.4239  | 22 | E   | 13 | 1302.7087 | 651.8580  | 434.9078  |
| 2608.2978 | 1304.6525 | 870.1041  | 23 | M   | 12 | 1173.6661 | 587.3367  | 391.8936  |
| 2764.4241 | 1382.7157 | 922.1462  | 24 | K   | 11 | 1042.6256 | 521.8164  | 348.2134  |
| 2821.4456 | 1411.2264 | 941.1534  | 25 | G   | 10 | 886.4993  | 443.7533  | 296.1713  |
| 2908.4776 | 1454.7424 | 970.1641  | 26 | S   | 9  | 829.4778  | 415.2425  | 277.1641  |
| 2979.5147 | 1490.2610 | 993.8431  | 27 | A   | 8  | 742.4458  | 371.7265  | 248.1534  |
| 3092.5988 | 1546.8030 | 1031.5378 | 28 | I   | 7  | 671.4087  | 336.2080  | 224.4744  |
| 3193.6465 | 1597.3269 | 1065.2203 | 29 | T   | 6  | 558.3246  | 279.6659  | 186.7797  |
| 3250.6679 | 1625.8376 | 1084.2275 | 30 | G   | 5  | 457.2769  | 229.1421  | 153.0972  |
| 3347.7207 | 1674.3640 | 1116.5784 | 31 | P   | 4  | 400.2554  | 200.6314  | 134.0900  |
| 3446.7891 | 1723.8982 | 1149.6012 | 32 | V   | 3  | 303.2027  | 152.1050  | 101.7391  |
| 3503.8106 | 1752.4089 | 1168.6084 | 33 | G   | 2  | 204.1343  | 102.5708  | 68.7163   |
|           |           |           | 34 | K   | 1  | 147.1128  | 74.0600   | 49.7091   |

[\[click\]](#) to move table  
 Static Modifications:  
 C: 57.02146  
 Variable Modifications:  
 K: 28.0314

Replicate 2

# RPL23B

## R.DGVFLYFEDNAGVIANPtri**K**GEMmono**K**GSAITGPVGK.E [88, 119] (missed 2)

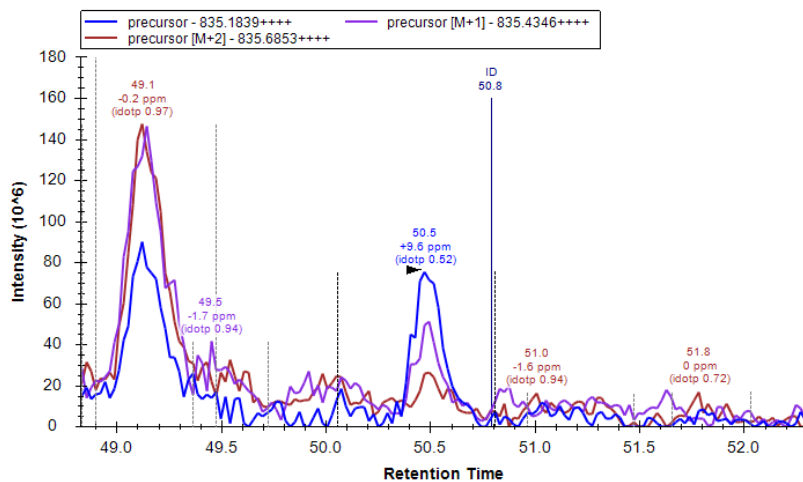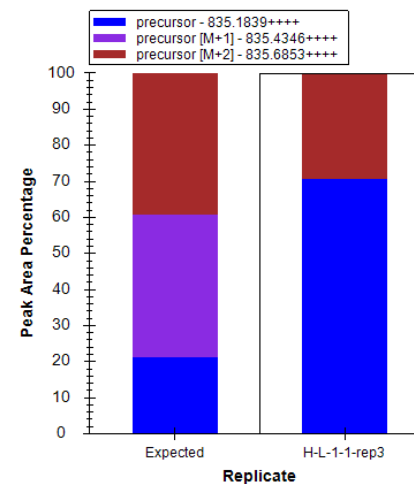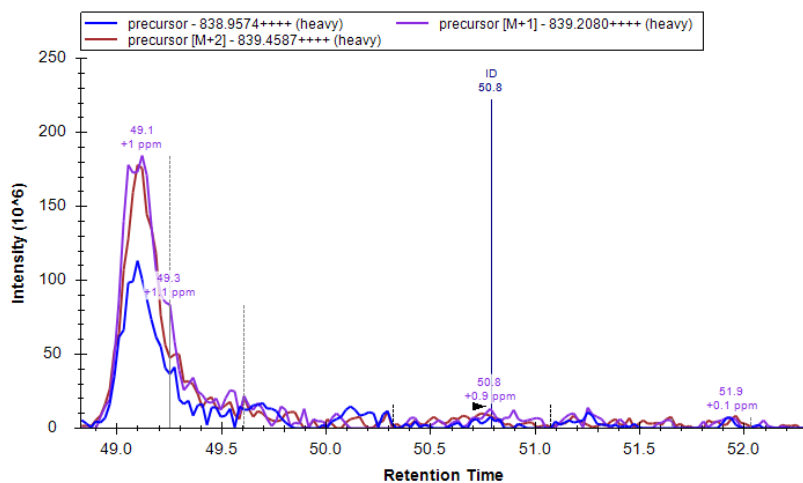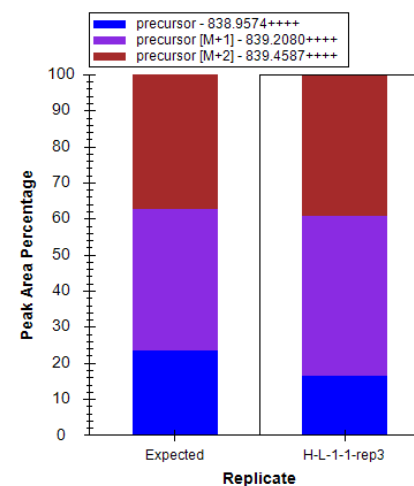

Replicate 3

# RPL23B

R.DGVFLYFEDNAGVIANPtri**K**GEMmono**K**GSAITGPVGK.E [88, 119] (missed 2)

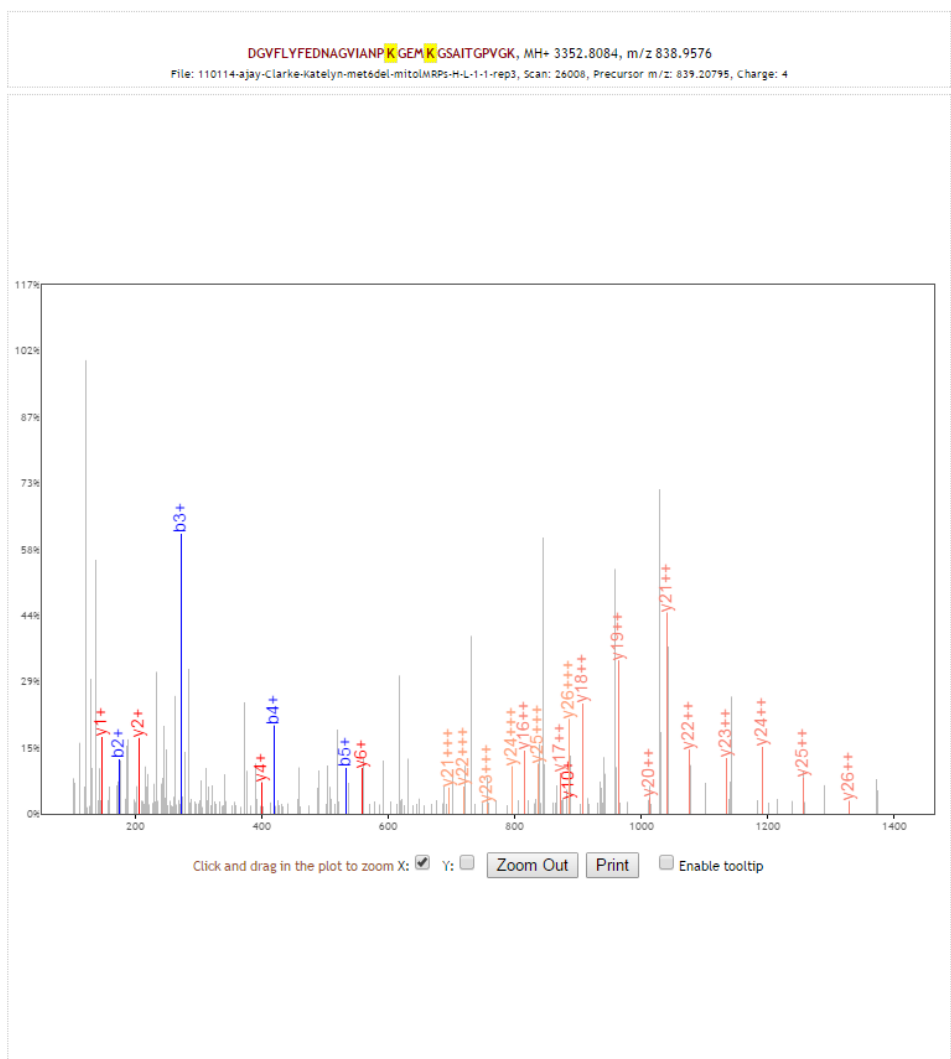

| b+              | b2+       | b3+       | #  | Seq #       | y+              | y2+              | y3+             |
|-----------------|-----------|-----------|----|-------------|-----------------|------------------|-----------------|
| 116.0342        | 58.5207   | 39.3496   | 1  | D 32        |                 |                  |                 |
| <b>173.0557</b> | 87.0315   | 58.3567   | 2  | G 31        | 3237.7814       | 1619.3944        | 1079.9320       |
| <b>272.1241</b> | 136.5657  | 91.3795   | 3  | V 30        | 3180.7600       | 1590.8836        | 1060.9248       |
| <b>419.1925</b> | 210.0999  | 140.4024  | 4  | F 29        | 3081.6916       | 1541.3494        | 1027.9020       |
| <b>532.2766</b> | 266.6419  | 178.0970  | 5  | L 28        | 2934.6232       | 1467.8152        | 978.8792        |
| 695.3399        | 348.1736  | 232.4515  | 6  | Y 27        | 2821.5391       | 1411.2732        | 941.1845        |
| 842.4083        | 421.7078  | 281.4743  | 7  | F 26        | 2658.4758       | <b>1329.7415</b> | <b>886.8301</b> |
| 971.4509        | 486.2291  | 324.4885  | 8  | E 25        | 2511.4073       | <b>1256.2073</b> | <b>837.8073</b> |
| 1086.4779       | 543.7426  | 362.8308  | 9  | D 24        | 2382.3648       | <b>1191.6860</b> | <b>794.7931</b> |
| 1200.5208       | 600.7640  | 400.8451  | 10 | N 23        | 2267.3378       | <b>1134.1725</b> | <b>756.4508</b> |
| 1271.5579       | 636.2826  | 424.5241  | 11 | A 22        | 2153.2949       | <b>1077.1511</b> | <b>718.4365</b> |
| 1328.5794       | 664.7933  | 443.5313  | 12 | G 21        | 2082.2578       | <b>1041.6325</b> | <b>694.7574</b> |
| 1427.6478       | 714.3275  | 476.5541  | 13 | V 20        | 2025.2363       | <b>1013.1218</b> | <b>675.7503</b> |
| 1540.7318       | 770.8696  | 514.2488  | 14 | I 19        | 1926.1679       | <b>963.5876</b>  | <b>642.7275</b> |
| 1611.7690       | 806.3881  | 537.9278  | 15 | A 18        | 1813.0838       | <b>907.0456</b>  | <b>605.0328</b> |
| 1725.8119       | 863.4096  | 575.9421  | 16 | N 17        | 1742.0467       | <b>871.5270</b>  | <b>581.3538</b> |
| 1822.8646       | 911.9360  | 608.2931  | 17 | P 16        | 1628.0038       | <b>814.5055</b>  | <b>543.3394</b> |
| 2002.0634       | 1001.5353 | 668.0260  | 18 | <b>K</b> 15 | 1530.9510       | 765.9792         | 510.9885        |
| 2059.0849       | 1030.0461 | 687.0331  | 19 | G 14        | 1351.7523       | 676.3798         | 451.2556        |
| 2188.1275       | 1094.5674 | 730.0473  | 20 | E 13        | 1294.7308       | 647.8690         | 432.2485        |
| 2322.1868       | 1161.5971 | 774.7338  | 21 | M 12        | 1165.6882       | 583.3477         | 389.2343        |
| 2467.3164       | 1234.1618 | 823.1103  | 22 | <b>K</b> 11 | 1031.6288       | 516.3180         | 344.5478        |
| 2524.3379       | 1262.6726 | 842.1175  | 23 | G 10        | <b>886.4993</b> | 443.7533         | 296.1713        |
| 2611.3699       | 1306.1886 | 871.1282  | 24 | S 9         | 829.4778        | 415.2425         | 277.1641        |
| 2682.4070       | 1341.7071 | 894.8072  | 25 | A 8         | 742.4458        | 371.7265         | 248.1534        |
| 2795.4911       | 1398.2492 | 932.5019  | 26 | I 7         | 671.4087        | 336.2080         | 224.4744        |
| 2896.5388       | 1448.7730 | 966.1844  | 27 | T 6         | <b>558.3246</b> | 279.6659         | 186.7797        |
| 2953.5602       | 1477.2837 | 985.1916  | 28 | G 5         | 457.2769        | 229.1421         | 153.0972        |
| 3050.6130       | 1525.8101 | 1017.5425 | 29 | P 4         | <b>400.2554</b> | 200.6314         | 134.0900        |
| 3149.6814       | 1575.3443 | 1050.5653 | 30 | V 3         | 303.2027        | 152.1050         | 101.7391        |
| 3206.7029       | 1603.8551 | 1069.5725 | 31 | G 2         | <b>204.1343</b> | 102.5708         | 68.7163         |
|                 |           |           | 32 | <b>K</b> 1  | <b>147.1128</b> | 74.0600          | 49.7091         |

[\[Click\]](#) to move table  
 Static Modifications:  
 C: 57.02146  
 M: 3.0189  
 Variable Modifications:  
 K: 51.1038

# RPL23B

R.DGVFLYFEDNAGVIANPmono**KGEM**tri**KGSAITGPVGK**.E [88, 119] (missed 2)

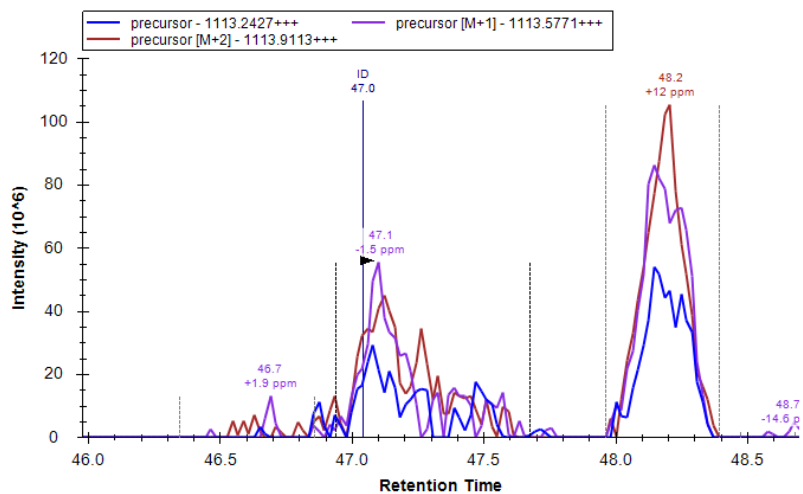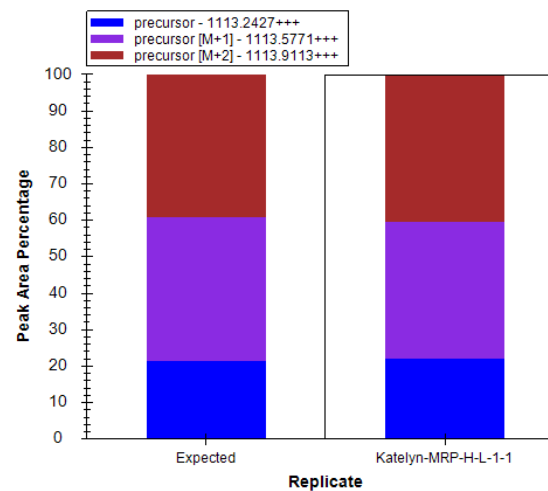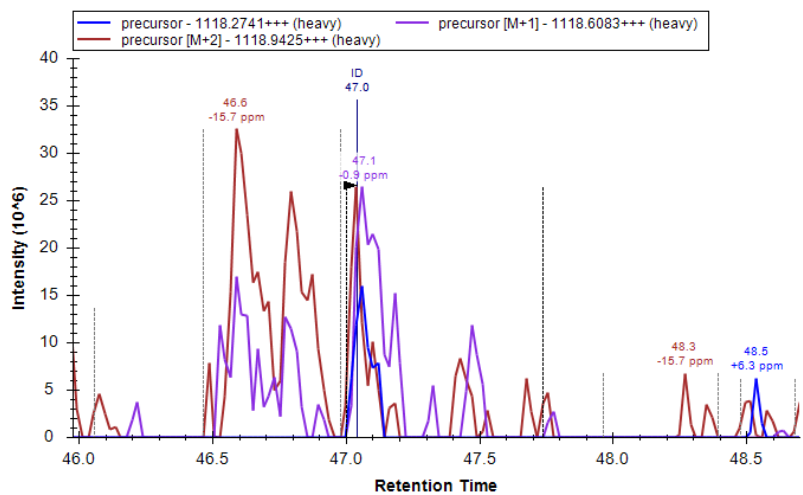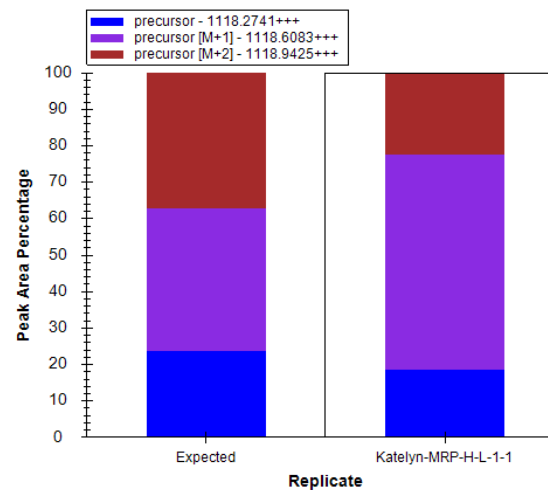

Replicate 2

# RPL23B

R.DGVFLYFEDNAGVIANPmono**K**GEMtri**K**GSAITGPVGK.E [88, 119] (missed 2)

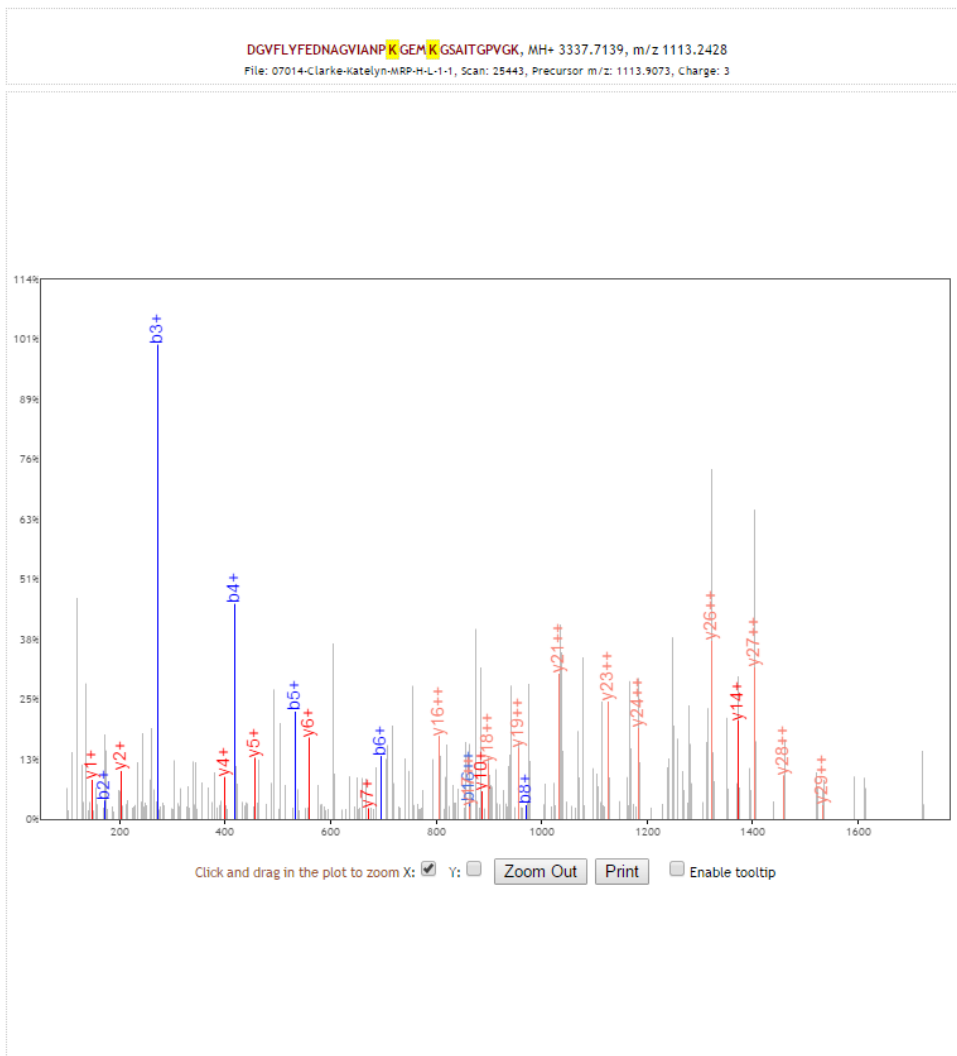

| b+        | b2+       | #  | Seq # | y+        | y2+       |
|-----------|-----------|----|-------|-----------|-----------|
| 116.0342  | 58.5207   | 1  | D 32  |           |           |
| 173.0557  | 87.0315   | 2  | G 31  | 3222.6869 | 1611.8471 |
| 272.1241  | 136.5657  | 3  | V 30  | 3165.6655 | 1583.3364 |
| 419.1925  | 210.0999  | 4  | F 29  | 3066.5971 | 1533.8022 |
| 532.2766  | 266.6419  | 5  | L 28  | 2919.5287 | 1460.2680 |
| 695.3399  | 348.1736  | 6  | Y 27  | 2806.4446 | 1403.7259 |
| 842.4083  | 421.7078  | 7  | F 26  | 2643.3813 | 1322.1943 |
| 971.4509  | 486.2291  | 8  | E 25  | 2496.3128 | 1248.6601 |
| 1086.4779 | 543.7426  | 9  | D 24  | 2367.2703 | 1184.1388 |
| 1200.5208 | 600.7640  | 10 | N 23  | 2252.2433 | 1126.6253 |
| 1271.5579 | 636.2826  | 11 | A 22  | 2138.2004 | 1069.6038 |
| 1328.5794 | 664.7933  | 12 | G 21  | 2067.1633 | 1034.0853 |
| 1427.6478 | 714.3275  | 13 | V 20  | 2010.1418 | 1005.5745 |
| 1540.7318 | 770.8696  | 14 | I 19  | 1911.0734 | 956.0403  |
| 1611.7690 | 806.3881  | 15 | A 18  | 1797.9893 | 899.4983  |
| 1725.8119 | 863.4096  | 16 | N 17  | 1726.9522 | 863.9797  |
| 1822.8646 | 911.9360  | 17 | P 16  | 1612.9093 | 806.9583  |
| 1964.9753 | 982.9913  | 18 | K 15  | 1515.8565 | 758.4319  |
| 2021.9968 | 1011.5020 | 19 | G 14  | 1373.7459 | 687.3766  |
| 2151.0394 | 1076.0233 | 20 | E 13  | 1316.7244 | 658.8658  |
| 2282.0798 | 1141.5436 | 21 | M 12  | 1187.6818 | 594.3445  |
| 2452.2219 | 1226.6146 | 22 | K 11  | 1056.6413 | 528.8243  |
| 2509.2434 | 1255.1253 | 23 | G 10  | 886.4993  | 443.7533  |
| 2596.2754 | 1298.6413 | 24 | S 9   | 829.4778  | 415.2425  |
| 2667.3125 | 1334.1599 | 25 | A 8   | 742.4458  | 371.7265  |
| 2780.3966 | 1390.7019 | 26 | I 7   | 671.4087  | 336.2080  |
| 2881.4443 | 1441.2258 | 27 | T 6   | 558.3246  | 279.6659  |
| 2938.4657 | 1469.7365 | 28 | G 5   | 457.2769  | 229.1421  |
| 3035.5185 | 1518.2629 | 29 | P 4   | 400.2554  | 200.6314  |
| 3134.5869 | 1567.7971 | 30 | V 3   | 303.2027  | 152.1050  |
| 3191.6084 | 1596.3078 | 31 | G 2   | 204.1343  | 102.5708  |
|           |           | 32 | K 1   | 147.1128  | 74.0600   |

[\[Click\]](#) to move table  
 Static Modifications:  
 C: 57.02146  
 Variable Modifications:  
 K: 14.0157

# RPL23B

R.DGVFLYFEDNAGVIANPmono**KGEM**tri**KGSAITGPVGK**.E [88, 119] (missed 2)

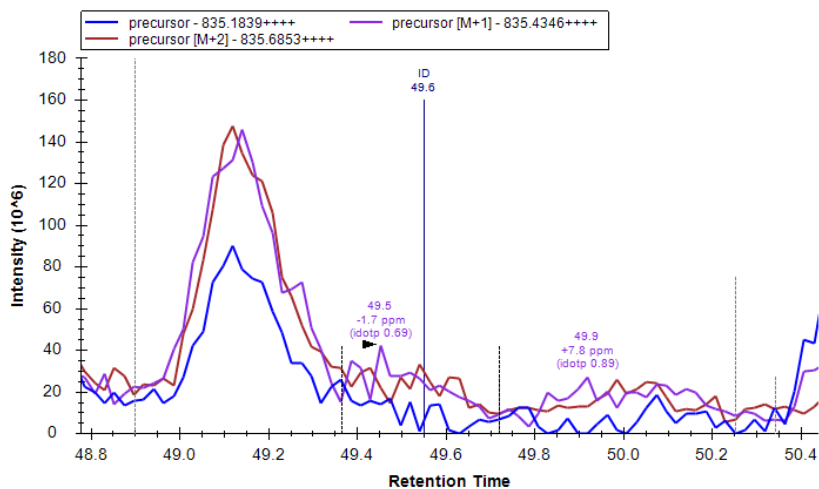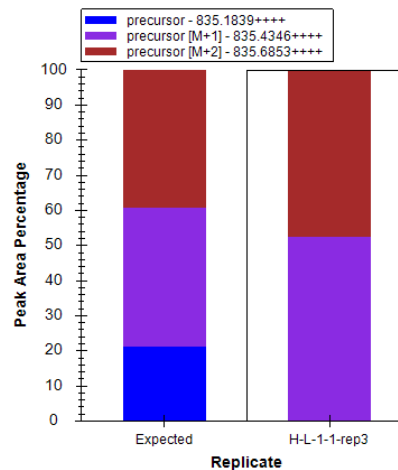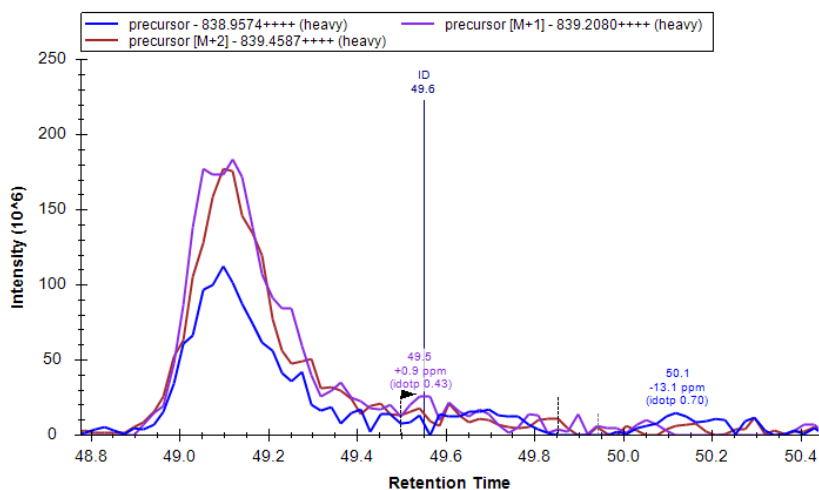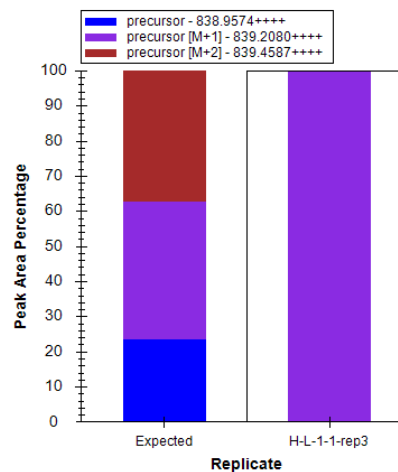

Replicate 3

# RPL23B

R.DGVFLYFEDNAGVIANPmono**K**GEMtri**K**GSAITGPVGK.E [88, 119] (missed 2)

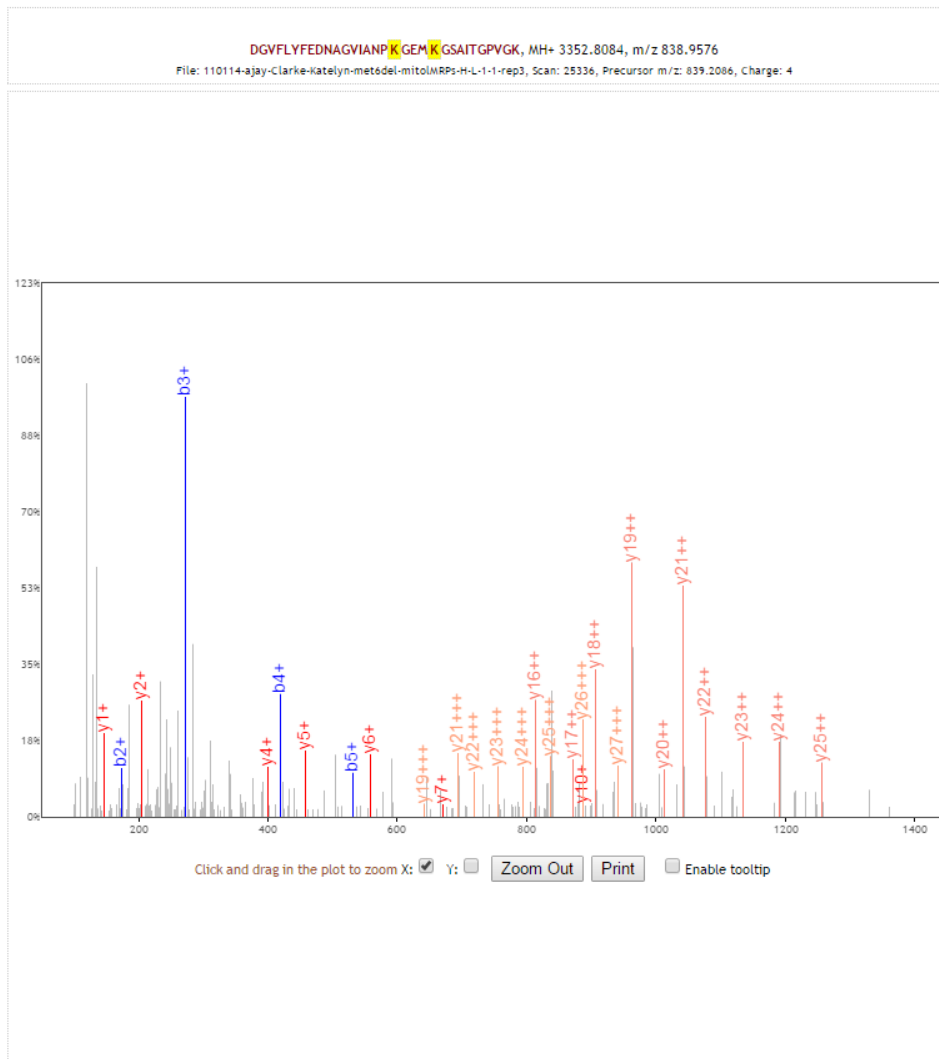

| b+              | b2+       | b3+       | #  | Seq      | #  | y+              | y2+       | y3+       |
|-----------------|-----------|-----------|----|----------|----|-----------------|-----------|-----------|
| 116.0342        | 58.5207   | 39.3496   | 1  | D        | 32 |                 |           |           |
| <b>173.0557</b> | 87.0315   | 58.3567   | 2  | G        | 31 | 3237.7814       | 1619.3944 | 1079.9320 |
| <b>272.1241</b> | 136.5657  | 91.3795   | 3  | V        | 30 | 3180.7600       | 1590.8836 | 1060.9248 |
| <b>419.1925</b> | 210.0999  | 140.4024  | 4  | F        | 29 | 3081.6916       | 1541.3494 | 1027.9020 |
| <b>532.2766</b> | 266.6419  | 178.0970  | 5  | L        | 28 | 2934.6232       | 1467.8152 | 978.8792  |
| 695.3399        | 348.1736  | 232.4515  | 6  | Y        | 27 | 2821.5391       | 1411.2732 | 941.1845  |
| 842.4083        | 421.7078  | 281.4743  | 7  | F        | 26 | 2658.4758       | 1329.7415 | 886.8301  |
| 971.4509        | 486.2291  | 324.4885  | 8  | E        | 25 | 2511.4073       | 1256.2073 | 837.8073  |
| 1086.4779       | 543.7426  | 362.8308  | 9  | D        | 24 | 2382.3648       | 1191.6860 | 794.7931  |
| 1200.5208       | 600.7640  | 400.8451  | 10 | N        | 23 | 2267.3378       | 1134.1725 | 756.4508  |
| 1271.5579       | 636.2826  | 424.5241  | 11 | A        | 22 | 2153.2949       | 1077.1511 | 718.4365  |
| 1328.5794       | 664.7933  | 443.5313  | 12 | G        | 21 | 2082.2578       | 1041.6325 | 694.7574  |
| 1427.6478       | 714.3275  | 476.5541  | 13 | V        | 20 | 2025.2363       | 1013.1218 | 675.7503  |
| 1540.7318       | 770.8696  | 514.2488  | 14 | I        | 19 | 1926.1679       | 963.5876  | 642.7275  |
| 1611.7690       | 806.3881  | 537.9278  | 15 | A        | 18 | 1813.0838       | 907.0456  | 605.0328  |
| 1725.8119       | 863.4096  | 575.9421  | 16 | N        | 17 | 1742.0467       | 871.5270  | 581.3538  |
| 1822.8646       | 911.9360  | 608.2931  | 17 | P        | 16 | 1628.0038       | 814.5055  | 543.3394  |
| 1967.9942       | 984.5007  | 656.6696  | 18 | <b>K</b> | 15 | 1530.9510       | 765.9792  | 510.9885  |
| 2025.0157       | 1013.0115 | 675.6767  | 19 | G        | 14 | 1385.8215       | 693.4144  | 462.6120  |
| 2154.0583       | 1077.5328 | 718.6909  | 20 | E        | 13 | 1328.8000       | 664.9036  | 443.6049  |
| 2288.1176       | 1144.5625 | 763.3774  | 21 | M        | 12 | 1199.7574       | 600.3823  | 400.5907  |
| 2467.3164       | 1234.1618 | 823.1103  | 22 | <b>K</b> | 11 | 1065.6980       | 533.3526  | 355.9042  |
| 2524.3379       | 1262.6726 | 842.1175  | 23 | G        | 10 | <b>886.4993</b> | 443.7533  | 296.1713  |
| 2611.3699       | 1306.1886 | 871.1282  | 24 | S        | 9  | 829.4778        | 415.2425  | 277.1641  |
| 2682.4070       | 1341.7071 | 894.8072  | 25 | A        | 8  | 742.4458        | 371.7265  | 248.1534  |
| 2795.4911       | 1398.2492 | 932.5019  | 26 | I        | 7  | <b>671.4087</b> | 336.2080  | 224.4744  |
| 2896.5388       | 1448.7730 | 966.1844  | 27 | T        | 6  | <b>558.3246</b> | 279.6659  | 186.7797  |
| 2953.5602       | 1477.2837 | 985.1916  | 28 | G        | 5  | <b>457.2769</b> | 229.1421  | 153.0972  |
| 3050.6130       | 1525.8101 | 1017.5425 | 29 | P        | 4  | <b>400.2554</b> | 200.6314  | 134.0900  |
| 3149.6814       | 1575.3443 | 1050.5653 | 30 | V        | 3  | 303.2027        | 152.1050  | 101.7391  |
| 3206.7029       | 1603.8551 | 1069.5725 | 31 | G        | 2  | <b>204.1343</b> | 102.5708  | 68.7163   |
|                 |           |           | 32 | <b>K</b> | 1  | <b>147.1128</b> | 74.0600   | 49.7091   |

[Click](#) to move table  
 Static Modifications:  
 C: 57.02146  
 M: 3.0189  
 Variable Modifications:  
 K: 17.0346



# Histone H3

## K.SAPSTGGVdiKKPHR.Y [28, 40] (missed 1)

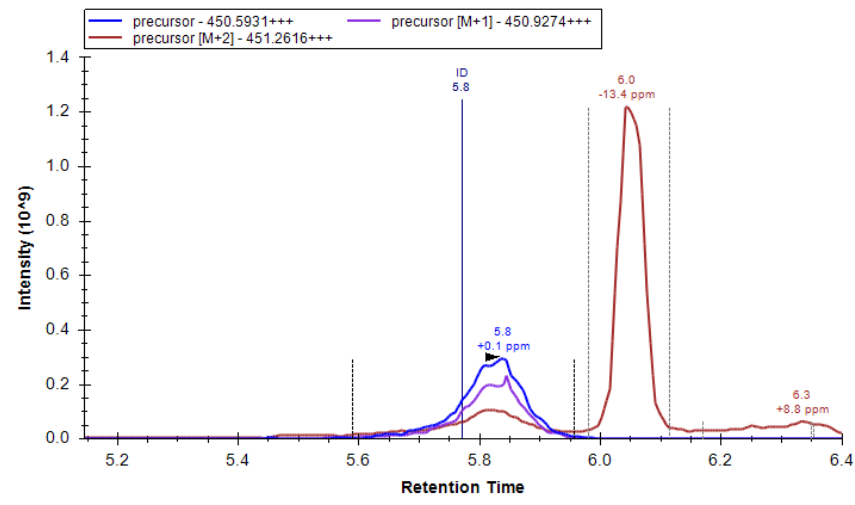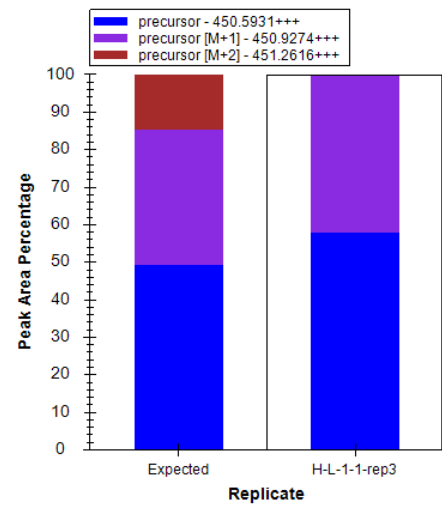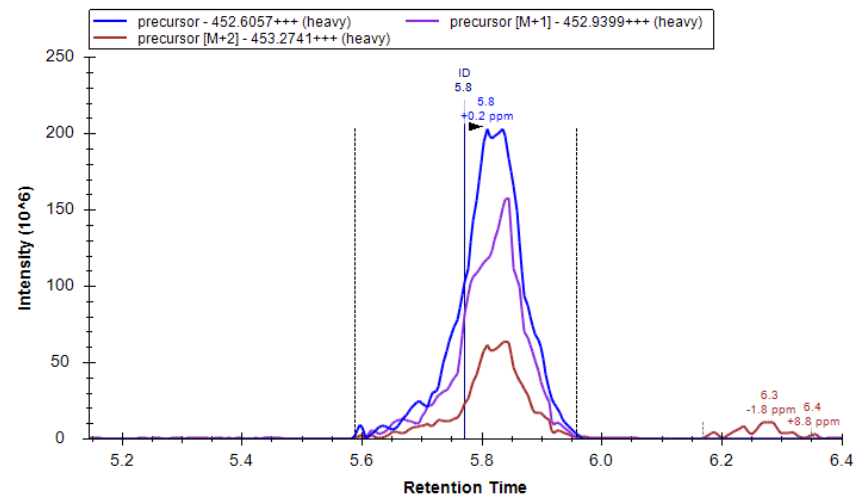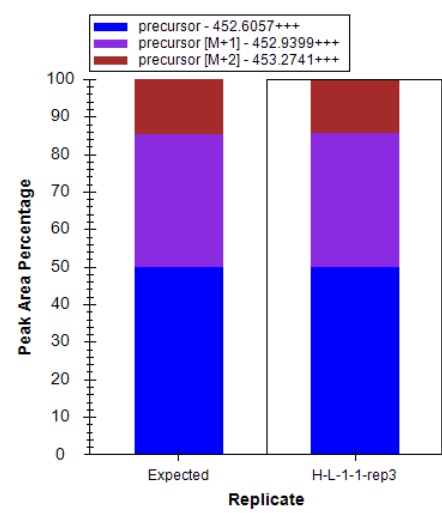

Replicate 3

# Histone H3

## K.SAPSTGGVdi**K**KPHR.Y [28, 40] (missed 1)

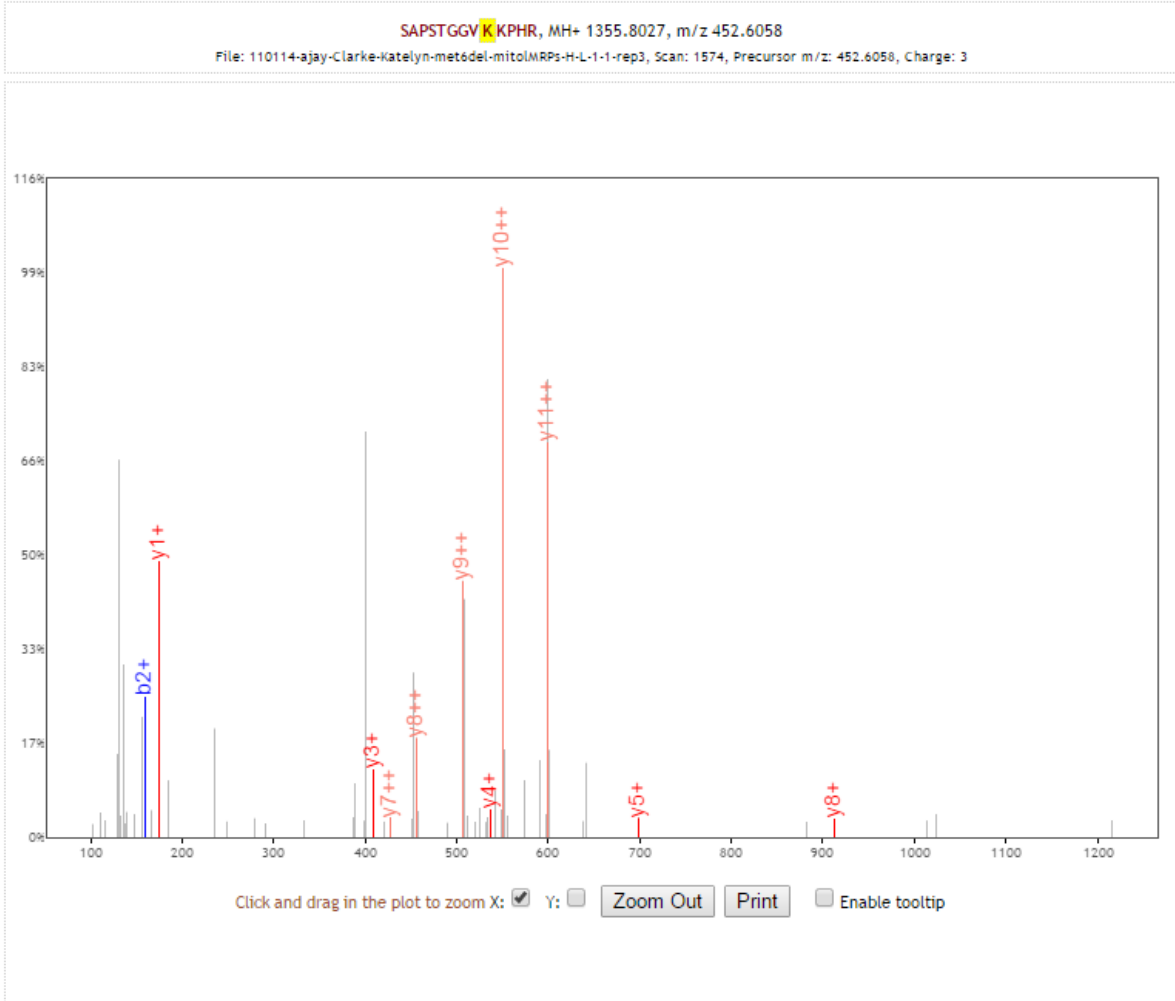

| b+        | b2+      | #  | Seq # | y+        | y2+      |
|-----------|----------|----|-------|-----------|----------|
| 88.0393   | 44.5233  | 1  | S 13  |           |          |
| 159.0764  | 80.0418  | 2  | A 12  | 1268.7707 | 634.8890 |
| 256.1292  | 128.5682 | 3  | P 11  | 1197.7336 | 599.3704 |
| 343.1612  | 172.0842 | 4  | S 10  | 1100.6808 | 550.8440 |
| 444.2089  | 222.6081 | 5  | T 9   | 1013.6488 | 507.3280 |
| 501.2304  | 251.1188 | 6  | G 8   | 912.6011  | 456.8042 |
| 558.2518  | 279.6295 | 7  | G 7   | 855.5796  | 428.2935 |
| 657.3202  | 329.1638 | 8  | V 6   | 798.5582  | 399.7827 |
| 819.4844  | 410.2458 | 9  | K 5   | 699.4898  | 350.2485 |
| 947.5794  | 474.2933 | 10 | K 4   | 537.3256  | 269.1664 |
| 1044.6321 | 522.8197 | 11 | P 3   | 409.2306  | 205.1190 |
| 1181.6910 | 591.3492 | 12 | H 2   | 312.1779  | 156.5926 |
|           |          | 13 | R 1   | 175.1190  | 88.0631  |

[\[click\]](#) to move table

Static Modifications:  
 C: 57.02146  
 M: 3.0189

Variable Modifications:  
 K: 34.0692

# Histone H3

## K.SAPSTGGVKmono**K**PHR.Y [28, 40] (missed 1)

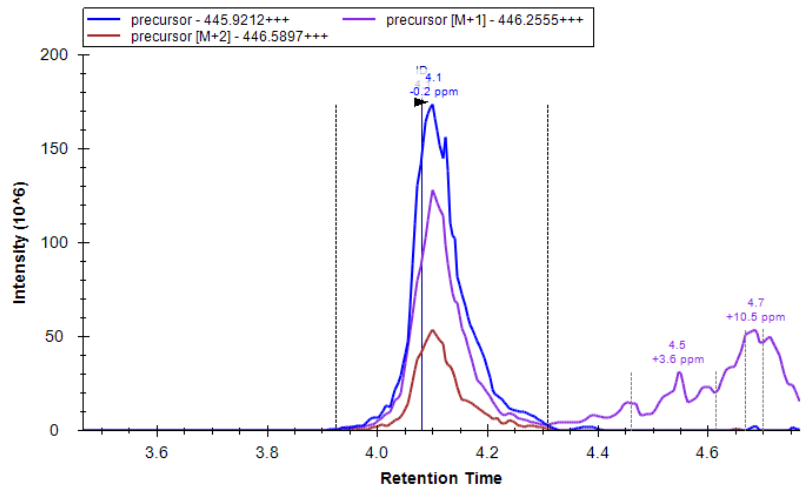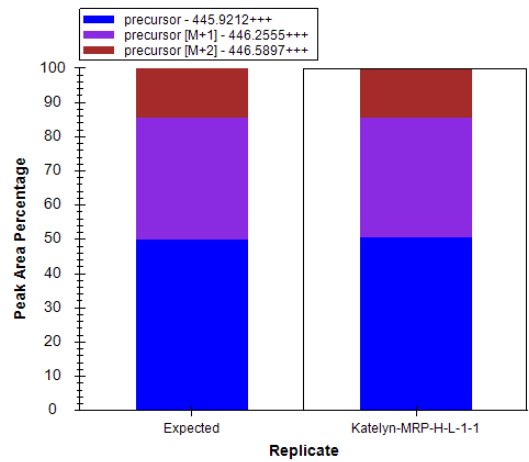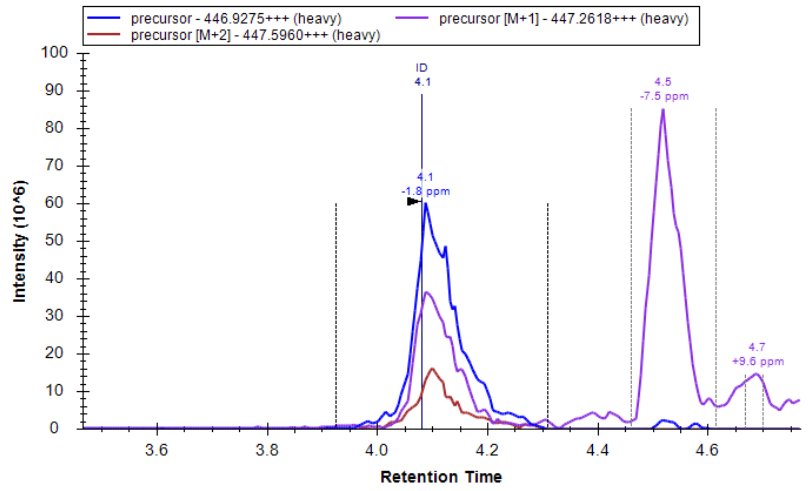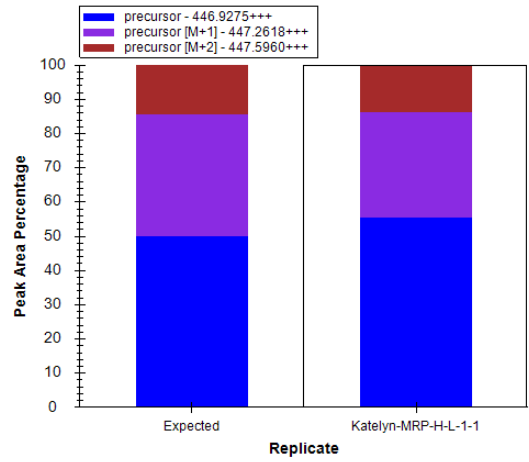

Replicate 2

# Histone H3

## K.SAPSTGGVKmonoKPHR.Y [28, 40] (missed 1)

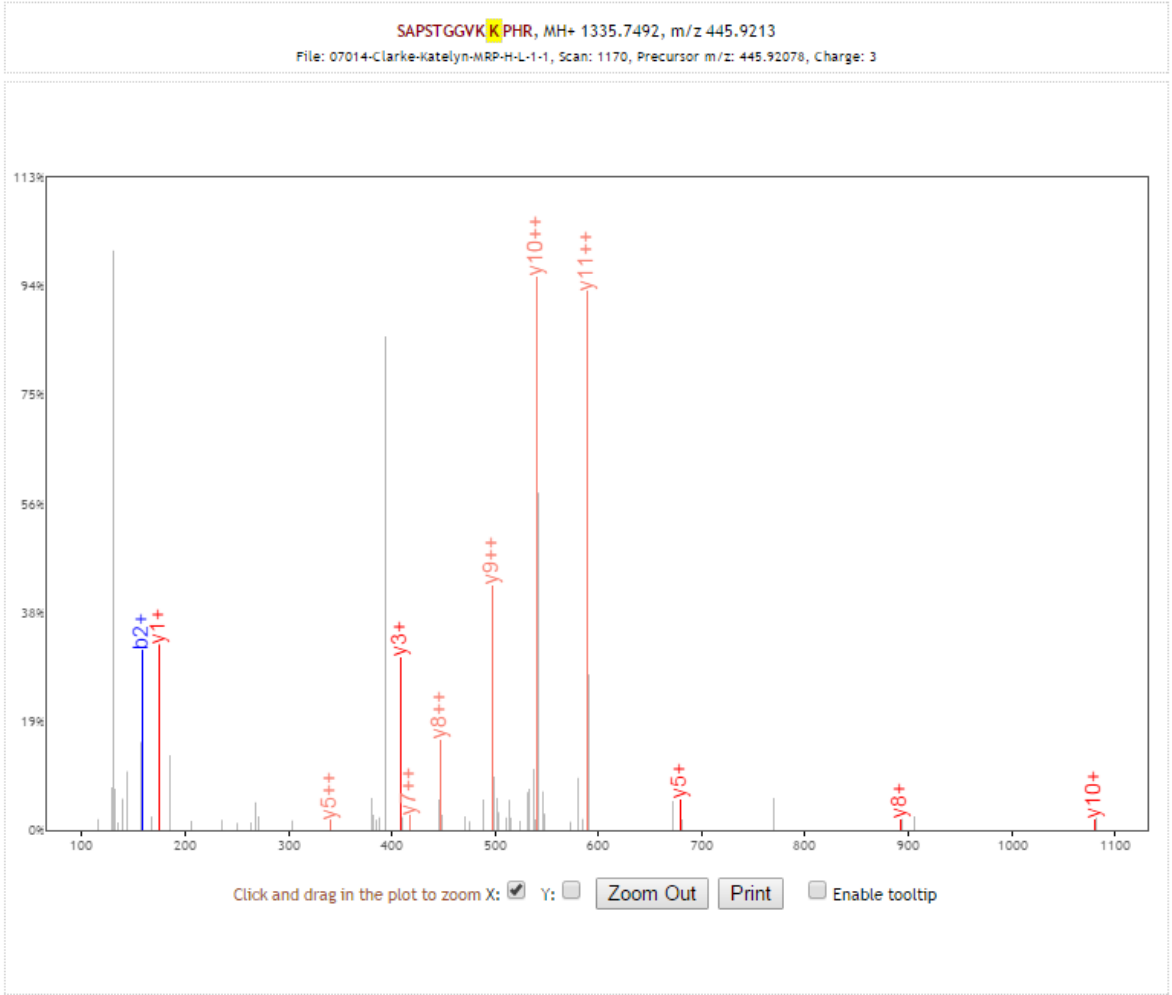

| b+              | b2+      | #  | Seq #      | y+               | y2+             |
|-----------------|----------|----|------------|------------------|-----------------|
| 88.0393         | 44.5233  | 1  | S 13       |                  |                 |
| <b>159.0764</b> | 80.0418  | 2  | A 12       | 1248.7172        | 624.8622        |
| 256.1292        | 128.5682 | 3  | P 11       | 1177.6801        | <b>589.3437</b> |
| 343.1612        | 172.0842 | 4  | S 10       | <b>1080.6273</b> | <b>540.8173</b> |
| 444.2089        | 222.6081 | 5  | T 9        | 993.5953         | <b>497.3013</b> |
| 501.2304        | 251.1188 | 6  | G 8        | <b>892.5476</b>  | <b>446.7774</b> |
| 558.2518        | 279.6295 | 7  | G 7        | 835.5261         | <b>418.2667</b> |
| 657.3202        | 329.1638 | 8  | V 6        | 778.5047         | 389.7560        |
| 785.4152        | 393.2112 | 9  | K 5        | <b>679.4363</b>  | <b>340.2218</b> |
| 927.5259        | 464.2666 | 10 | <b>K</b> 4 | 551.3413         | 276.1743        |
| 1024.5786       | 512.7929 | 11 | P 3        | <b>409.2306</b>  | 205.1190        |
| 1161.6375       | 581.3224 | 12 | H 2        | 312.1779         | 156.5926        |
|                 |          | 13 | R 1        | <b>175.1190</b>  | 88.0631         |

[\[Click\]](#) to move table

Static Modifications:  
 C: 57.02146

Variable Modifications:  
 K: 14.0157

# eEF1A

## K.STTTGHLIYmono**K**CGGIDKR.T [20, 36] (missed 2)

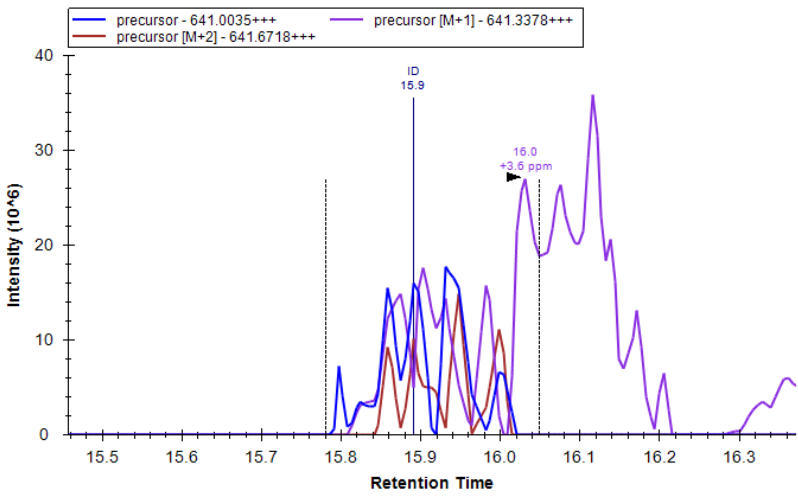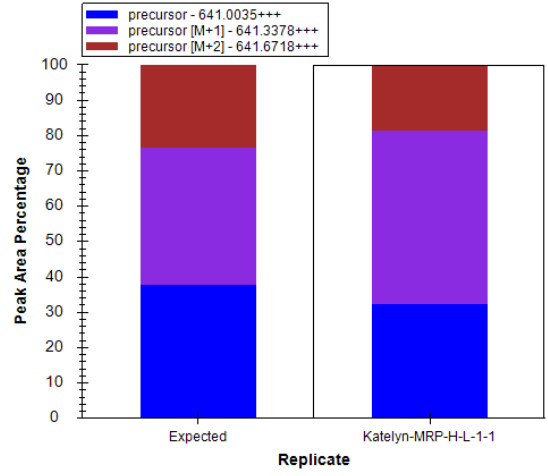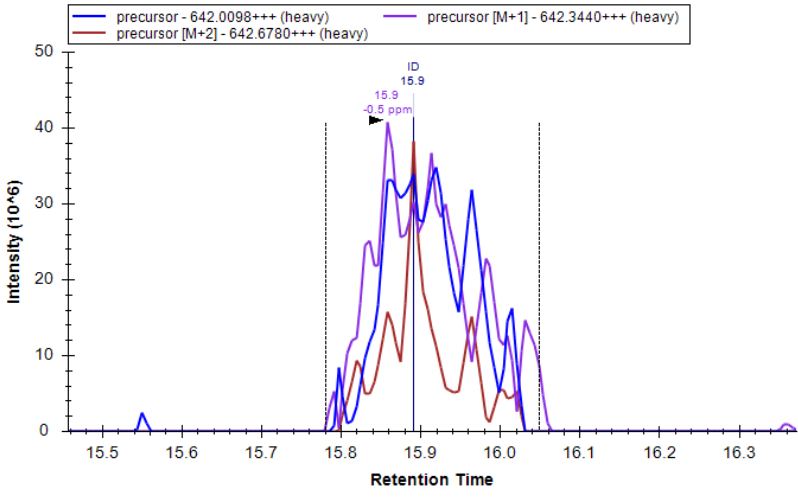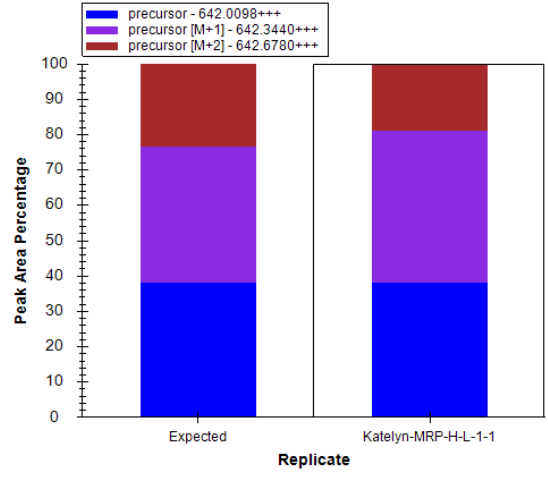

Replicate 2

# eEF1A

## K.STTTGHLIYmono**K**CGGIDKR.T [20, 36] (missed 2)

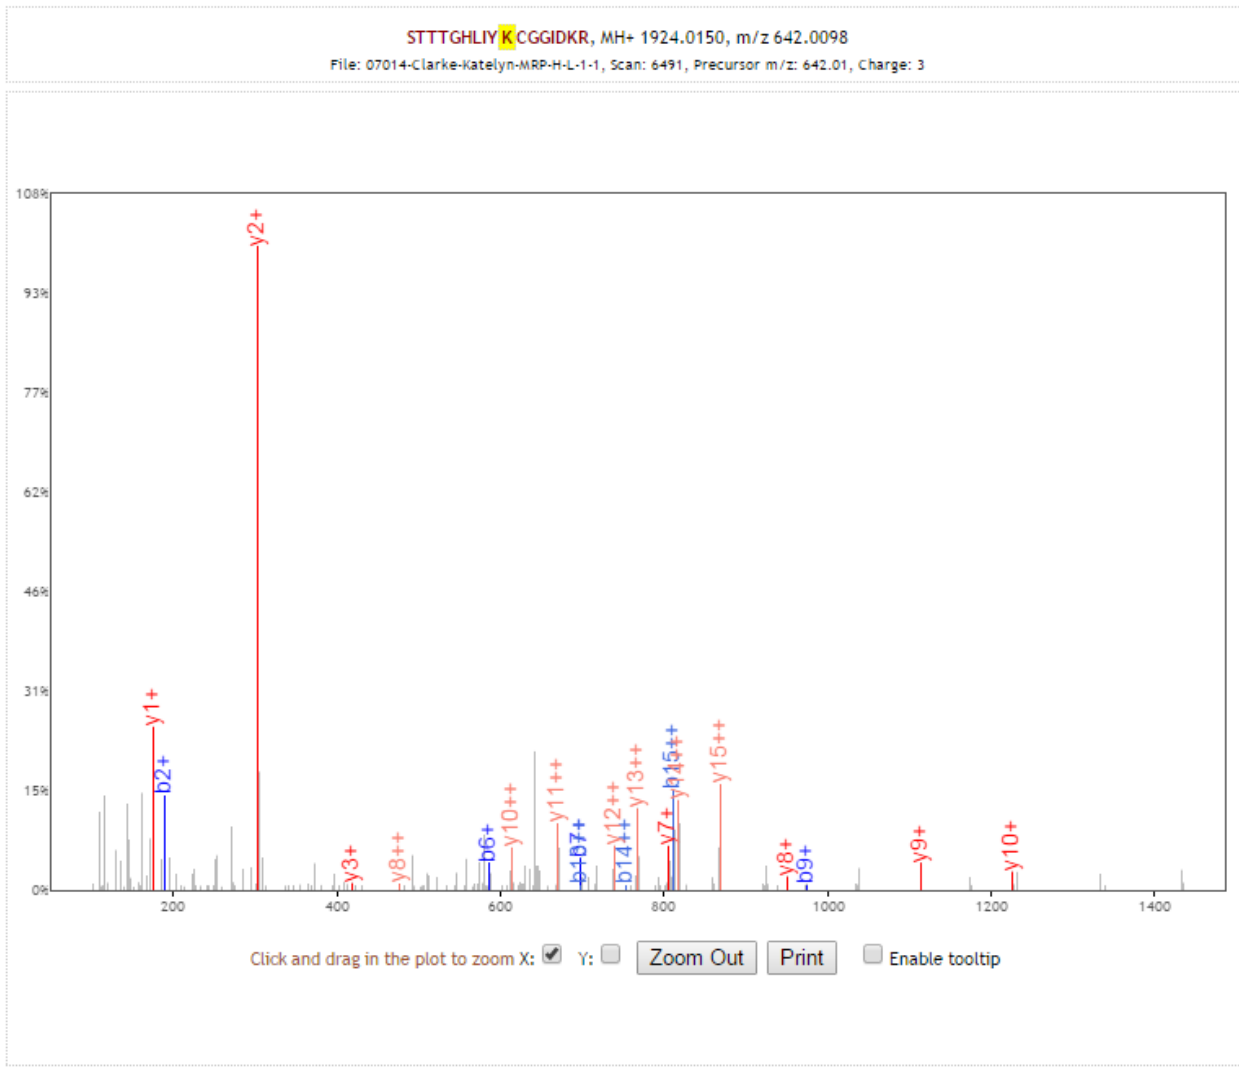

| b+              | b2+             | #  | Seq #      | y+               | y2+             |
|-----------------|-----------------|----|------------|------------------|-----------------|
| 88.0393         | 44.5233         | 1  | S 17       |                  |                 |
| <b>189.0870</b> | 95.0471         | 2  | T 16       | 1836.9829        | 918.9951        |
| 290.1347        | 145.5710        | 3  | T 15       | 1735.9352        | <b>868.4713</b> |
| 391.1823        | 196.0948        | 4  | T 14       | 1634.8876        | <b>817.9474</b> |
| 448.2038        | 224.6055        | 5  | G 13       | 1533.8399        | <b>767.4236</b> |
| <b>585.2627</b> | 293.1350        | 6  | H 12       | 1476.8184        | <b>738.9129</b> |
| <b>698.3468</b> | 349.6770        | 7  | L 11       | 1339.7595        | <b>670.3834</b> |
| 811.4308        | 406.2191        | 8  | I 10       | <b>1226.6754</b> | <b>613.8414</b> |
| <b>974.4942</b> | 487.7507        | 9  | Y 9        | <b>1113.5914</b> | 557.2993        |
| 1119.6237       | 560.3155        | 10 | <b>K</b> 8 | <b>950.5281</b>  | <b>475.7677</b> |
| 1279.6544       | 640.3308        | 11 | C 7        | <b>805.3985</b>  | 403.2029        |
| 1336.6758       | 668.8416        | 12 | G 6        | 645.3678         | 323.1876        |
| 1393.6973       | <b>697.3523</b> | 13 | G 5        | 588.3464         | 294.6768        |
| 1506.7814       | <b>753.8943</b> | 14 | I 4        | 531.3249         | 266.1661        |
| 1621.8083       | <b>811.4078</b> | 15 | D 3        | <b>418.2409</b>  | 209.6241        |
| 1749.9033       | 875.4553        | 16 | K 2        | <b>303.2139</b>  | 152.1106        |
|                 |                 | 17 | R 1        | <b>175.1190</b>  | 88.0631         |

[\[click\]](#) to move table

Static Modifications:  
 C: 57.02146  
 M: 3.0189

Variable Modifications:  
 K: 17.0346

# Rpl12ab

K.IQNmono**R**QAAASVVPSASSLVITALKEPPR.D [63, 89] (missed 2)

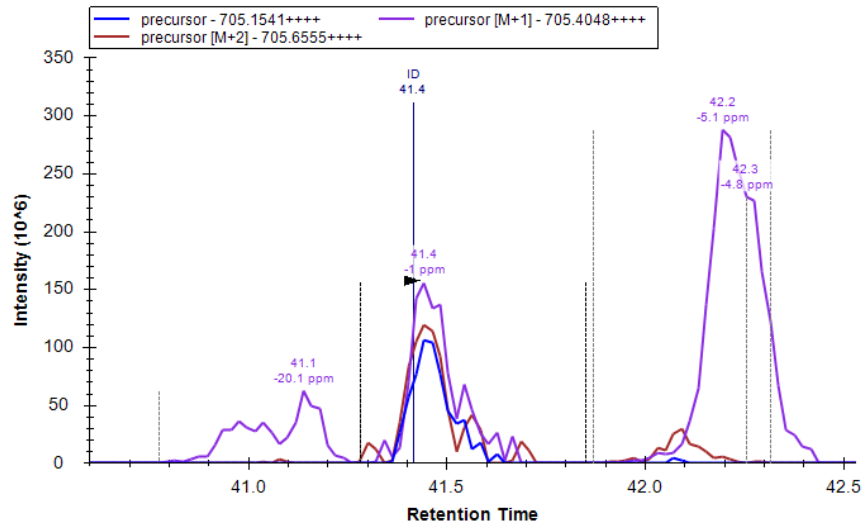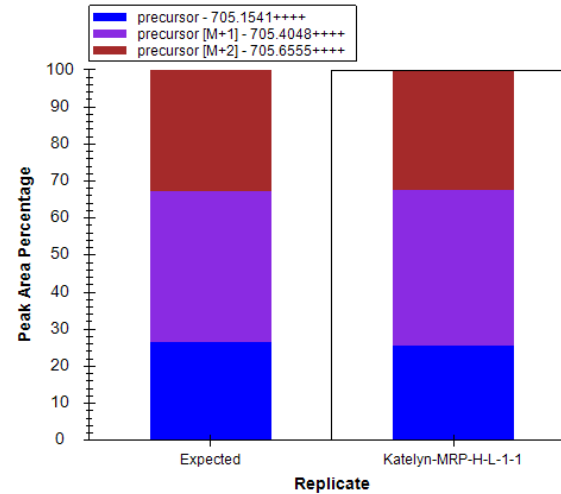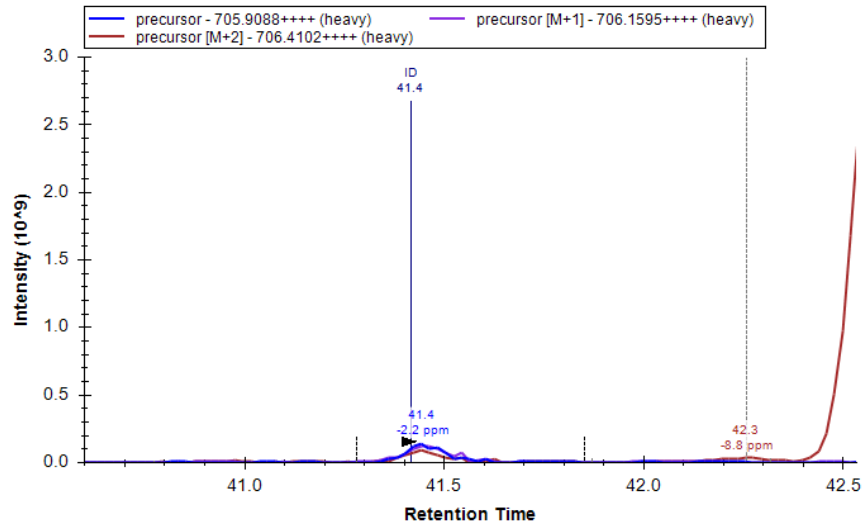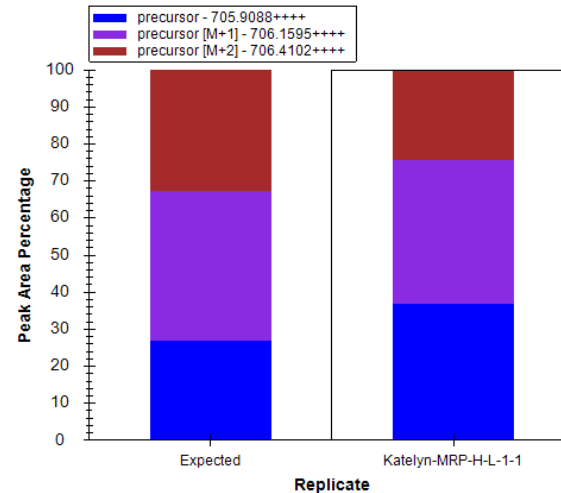

Replicate 2

# Rpl12ab

K.IQNmono**R**QAAASVVPSASSLVITALKEPPR.D [63, 89] (missed 2)

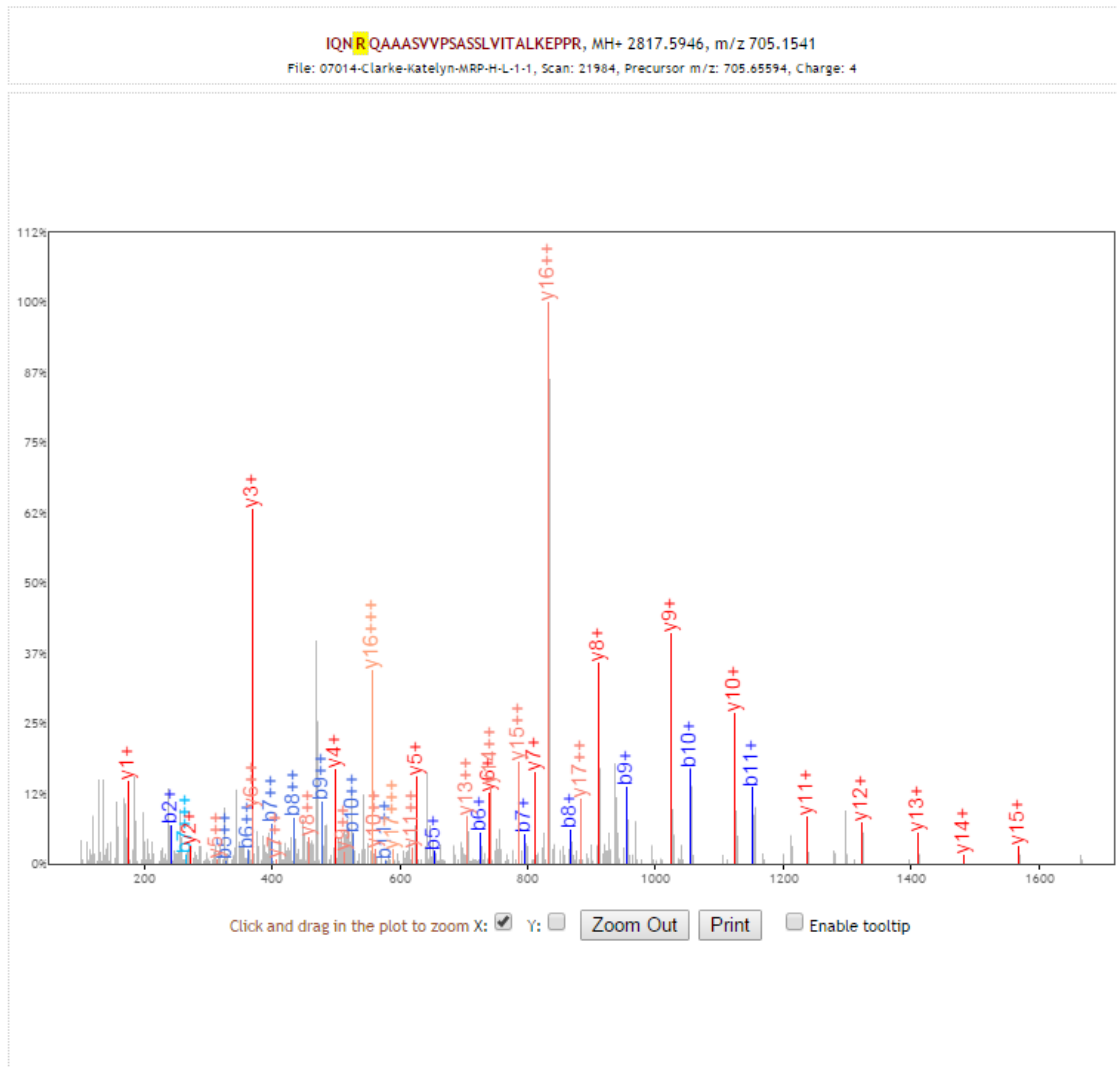

| b+               | b2+             | b3+             | #  | Seq #    | y+ | y2+              | y3+             |
|------------------|-----------------|-----------------|----|----------|----|------------------|-----------------|
| 114.0913         | 57.5493         | 38.7020         | 1  | I        | 27 |                  |                 |
| <b>242.1499</b>  | 121.5786        | 81.3882         | 2  | Q        | 26 | 2704.5105        | 1352.7589       |
| 356.1928         | 178.6001        | 119.4025        | 3  | N        | 25 | 2576.4519        | 1288.7296       |
| 526.3097         | 263.6585        | 176.1081        | 4  | <b>R</b> | 24 | 2462.4090        | 1231.7081       |
| <b>654.3682</b>  | <b>327.6878</b> | 218.7943        | 5  | Q        | 23 | 2292.2922        | 1146.6497       |
| <b>725.4053</b>  | <b>363.2063</b> | <b>242.4733</b> | 6  | A        | 22 | 2164.2336        | 1082.6204       |
| <b>796.4425</b>  | <b>398.7249</b> | <b>266.1523</b> | 7  | A        | 21 | 2093.1965        | 1047.1019       |
| <b>867.4796</b>  | <b>434.2434</b> | 289.8314        | 8  | A        | 20 | 2022.1594        | 1011.5833       |
| <b>954.5116</b>  | <b>477.7594</b> | 318.8421        | 9  | S        | 19 | 1951.1223        | 976.0648        |
| <b>1053.5800</b> | <b>527.2936</b> | 351.8649        | 10 | V        | 18 | 1864.0902        | 932.5488        |
| <b>1152.6484</b> | <b>576.8279</b> | 384.8877        | 11 | V        | 17 | 1765.0218        | <b>883.0145</b> |
| 1249.7012        | 625.3542        | 417.2386        | 12 | P        | 16 | 1665.9534        | <b>833.4803</b> |
| 1336.7332        | 668.8702        | 446.2493        | 13 | S        | 15 | <b>1568.9006</b> | <b>784.9540</b> |
| 1407.7703        | 704.3888        | 469.9283        | 14 | A        | 14 | <b>1481.8686</b> | <b>741.4379</b> |
| 1494.8024        | 747.9048        | 498.9390        | 15 | S        | 13 | <b>1410.8315</b> | <b>705.9194</b> |
| 1581.8344        | 791.4208        | 527.9496        | 16 | S        | 12 | <b>1323.7995</b> | <b>662.4034</b> |
| 1694.9185        | 847.9629        | 565.6443        | 17 | L        | 11 | <b>1236.7674</b> | <b>618.8874</b> |
| 1793.9869        | 897.4971        | 598.6671        | 18 | V        | 10 | <b>1123.6834</b> | <b>562.3453</b> |
| 1907.0709        | 954.0391        | 636.3618        | 19 | I        | 9  | <b>1024.6150</b> | <b>512.8111</b> |
| 2008.1186        | 1004.5629       | 670.0444        | 20 | T        | 8  | <b>911.5309</b>  | <b>456.2691</b> |
| 2079.1557        | 1040.0815       | 693.7234        | 21 | A        | 7  | <b>810.4832</b>  | <b>405.7452</b> |
| 2192.2398        | 1096.6235       | 731.4181        | 22 | L        | 6  | <b>739.4461</b>  | <b>370.2267</b> |
| 2320.3348        | 1160.6710       | 774.1164        | 23 | K        | 5  | <b>626.3620</b>  | <b>313.6847</b> |
| 2449.3773        | 1225.1923       | 817.1306        | 24 | E        | 4  | <b>498.2671</b>  | <b>249.6372</b> |
| 2546.4301        | 1273.7187       | 849.4816        | 25 | P        | 3  | <b>369.2245</b>  | <b>185.1159</b> |
| 2643.4829        | 1322.2451       | 881.8325        | 26 | P        | 2  | <b>272.1717</b>  | <b>136.5895</b> |
|                  |                 |                 | 27 | R        | 1  | <b>175.1190</b>  | <b>88.0631</b>  |

[Click] to move table

Static Modifications:  
C: 57.02146

Variable Modifications:  
R: 14.0157



# Rpl12ab

K.IQNmono**R**QAAASVVPSASSLVITALKEPPR.D [63, 89] (missed 2)

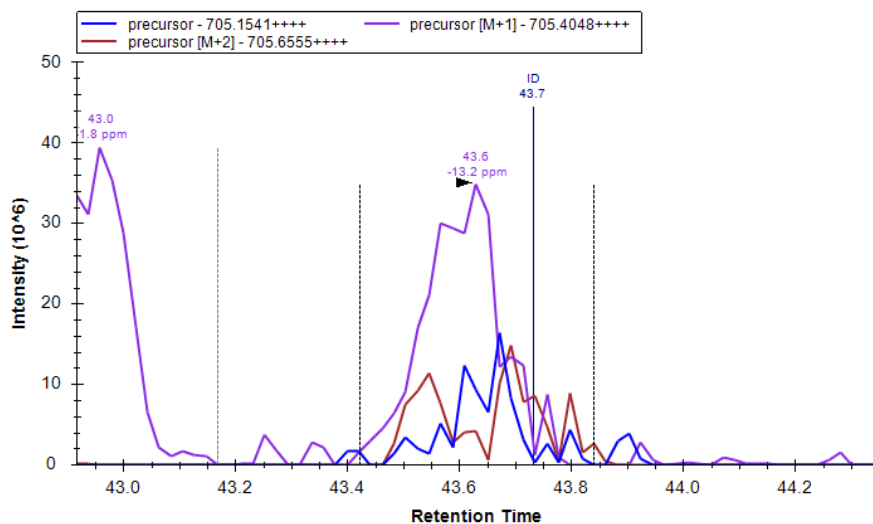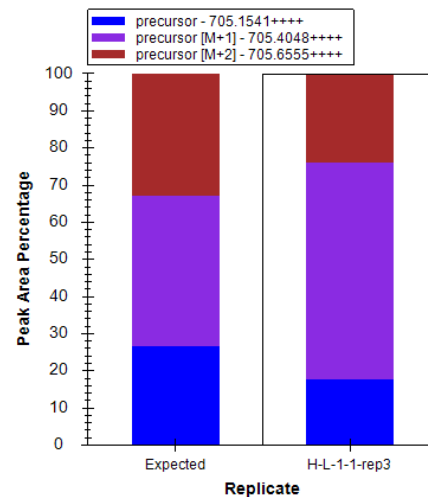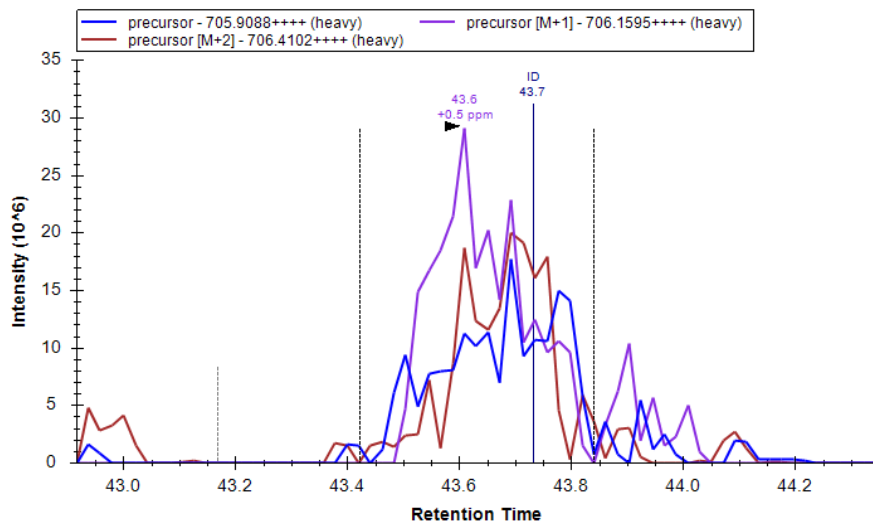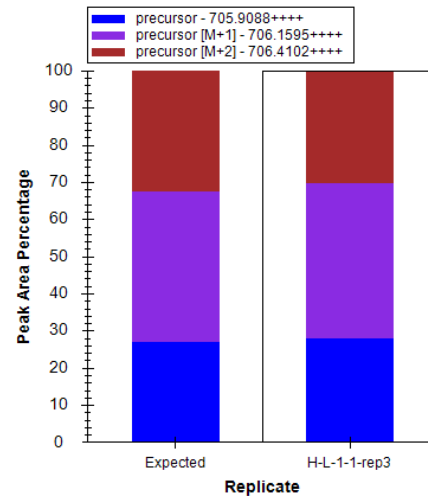

Replicate 3

# Rpl12ab

K.IQNmono**R**QAAASVVPSASSLVITALKEPPR.D [63, 89] (missed 2)

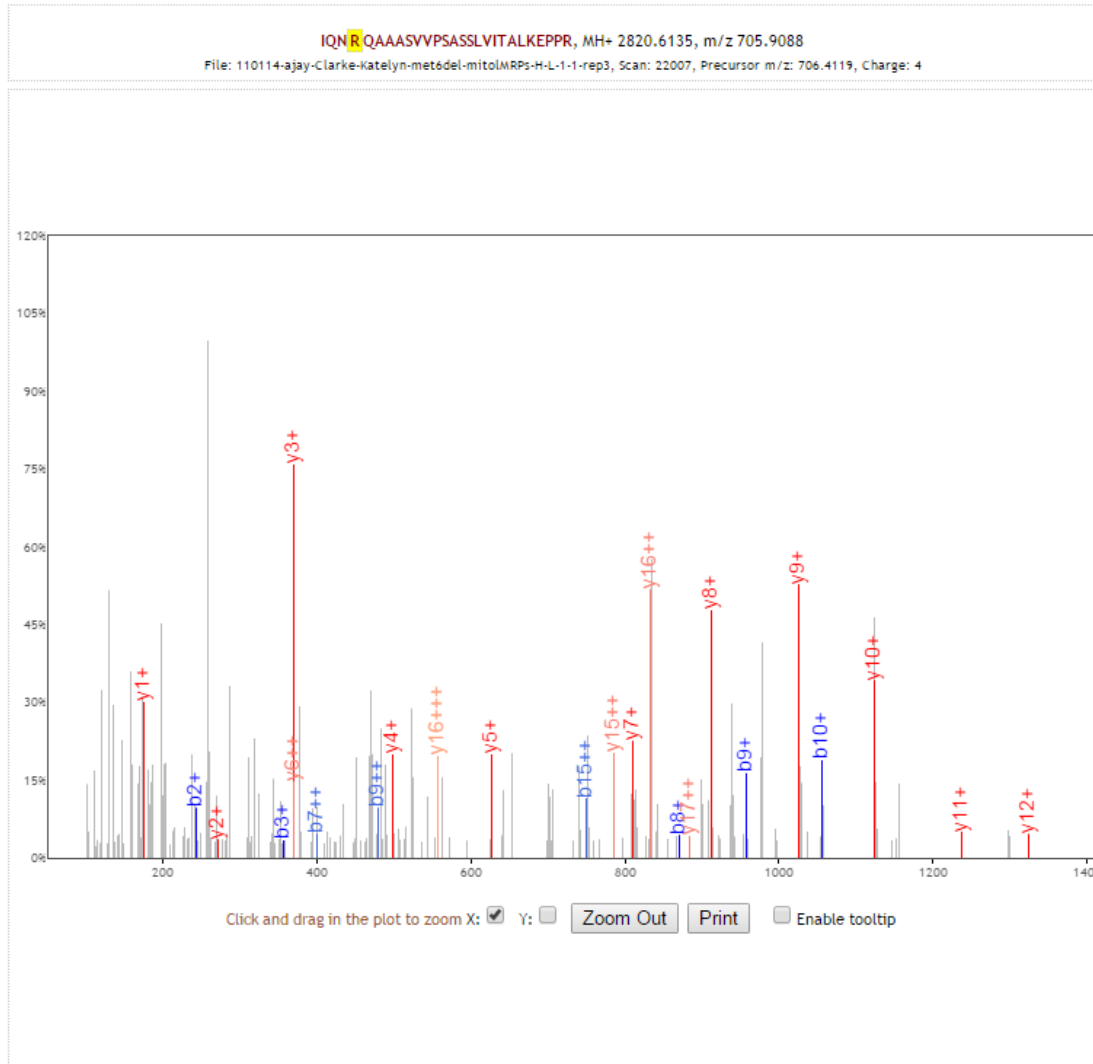

| b+               | b2+             | b3+      | #  | Seq      | #  | y+               | y2+             | y3+             |
|------------------|-----------------|----------|----|----------|----|------------------|-----------------|-----------------|
| 114.0913         | 57.5493         | 38.7020  | 1  | I        | 27 |                  |                 |                 |
| <b>242.1499</b>  | 121.5786        | 81.3882  | 2  | Q        | 26 | 2707.5294        | 1354.2683       | 903.1813        |
| <b>356.1928</b>  | 178.6001        | 119.4025 | 3  | N        | 25 | 2579.4708        | 1290.2390       | 860.4951        |
| 529.3286         | 265.1679        | 177.1144 | 4  | <b>R</b> | 24 | 2465.4279        | 1233.2176       | 822.4808        |
| 657.3871         | 329.1972        | 219.8006 | 5  | Q        | 23 | 2292.2922        | 1146.6497       | 764.7689        |
| 728.4242         | 364.7158        | 243.4796 | 6  | A        | 22 | 2164.2336        | 1082.6204       | 722.0827        |
| 799.4614         | <b>400.2343</b> | 267.1586 | 7  | A        | 21 | 2093.1965        | 1047.1019       | 698.4037        |
| <b>870.4985</b>  | 435.7529        | 290.8377 | 8  | A        | 20 | 2022.1594        | 1011.5833       | 674.7246        |
| <b>957.5305</b>  | <b>479.2689</b> | 319.8484 | 9  | S        | 19 | 1951.1223        | 976.0648        | 651.0456        |
| <b>1056.5989</b> | 528.8031        | 352.8712 | 10 | V        | 18 | 1864.0902        | 932.5488        | 622.0349        |
| 1155.6673        | 578.3373        | 385.8940 | 11 | V        | 17 | 1765.0218        | <b>883.0145</b> | 589.0121        |
| 1252.7201        | 626.8637        | 418.2449 | 12 | P        | 16 | 1665.9534        | <b>833.4803</b> | <b>555.9893</b> |
| 1339.7521        | 670.3797        | 447.2556 | 13 | S        | 15 | 1568.9006        | <b>784.9540</b> | 523.6384        |
| 1410.7892        | 705.8983        | 470.9346 | 14 | A        | 14 | 1481.8686        | 741.4379        | 494.6277        |
| 1497.8213        | <b>749.4143</b> | 499.9453 | 15 | S        | 13 | 1410.8315        | 705.9194        | 470.9487        |
| 1584.8533        | 792.9303        | 528.9559 | 16 | S        | 12 | <b>1323.7995</b> | 662.4034        | 441.9380        |
| 1697.9374        | 849.4723        | 566.6506 | 17 | L        | 11 | <b>1236.7674</b> | 618.8874        | 412.9273        |
| 1797.0058        | 899.0065        | 599.6734 | 18 | V        | 10 | <b>1123.6834</b> | 562.3453        | 375.2326        |
| 1910.0898        | 955.5486        | 637.3681 | 19 | I        | 9  | <b>1024.6150</b> | 512.8111        | 342.2098        |
| 2011.1375        | 1006.0724       | 671.0507 | 20 | T        | 8  | <b>911.5309</b>  | 456.2691        | 304.5151        |
| 2082.1746        | 1041.5910       | 694.7297 | 21 | A        | 7  | <b>810.4832</b>  | 405.7452        | 270.8326        |
| 2195.2587        | 1098.1330       | 732.4244 | 22 | L        | 6  | 739.4461         | <b>370.2267</b> | 247.1536        |
| 2323.3537        | 1162.1805       | 775.1227 | 23 | K        | 5  | <b>626.3620</b>  | 313.6847        | 209.4589        |
| 2452.3962        | 1226.7018       | 818.1369 | 24 | E        | 4  | <b>498.2671</b>  | 249.6372        | 166.7605        |
| 2549.4490        | 1275.2281       | 850.4879 | 25 | P        | 3  | <b>369.2245</b>  | 185.1159        | 123.7463        |
| 2646.5018        | 1323.7545       | 882.8388 | 26 | P        | 2  | <b>272.1717</b>  | 136.5895        | 91.3954         |
|                  |                 |          | 27 | R        | 1  | <b>175.1190</b>  | 88.0631         | 59.0445         |

[\[Click\]](#) to move table

Static Modifications:  
C: 57.02146  
M: 3.0189

Variable Modifications:  
R: 17.0346

# Rpl12ab

K.IQNmono**R**QAAASVVPSASSLVITALKEPPRDR.K [63, 91]

(missed 3)

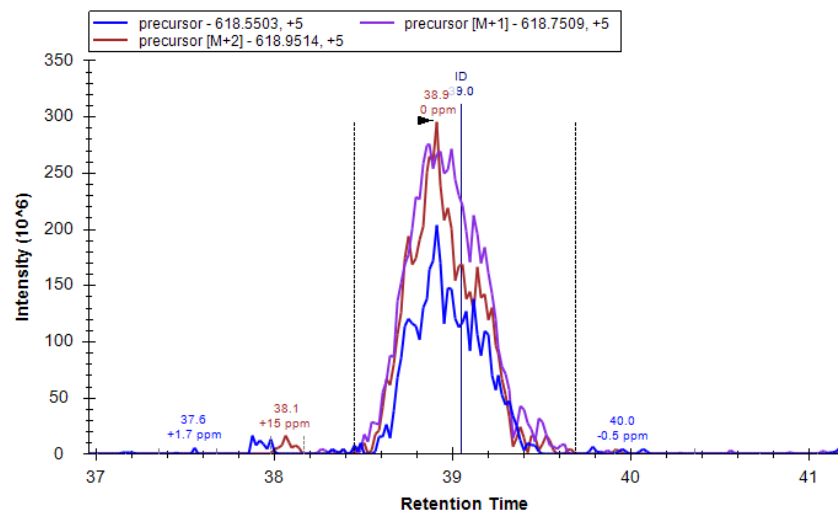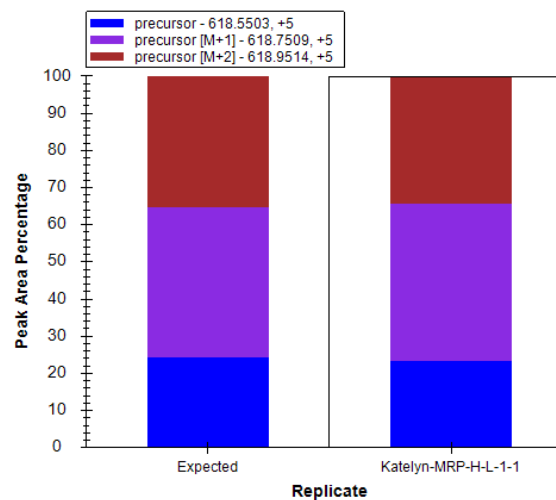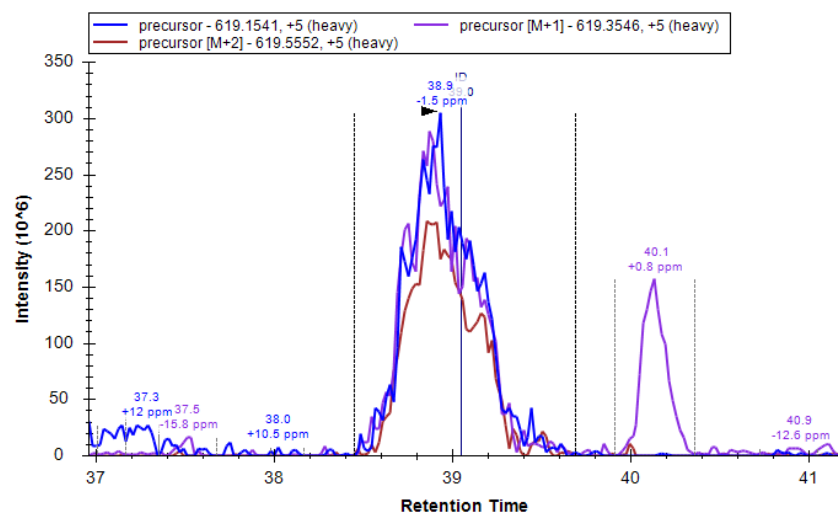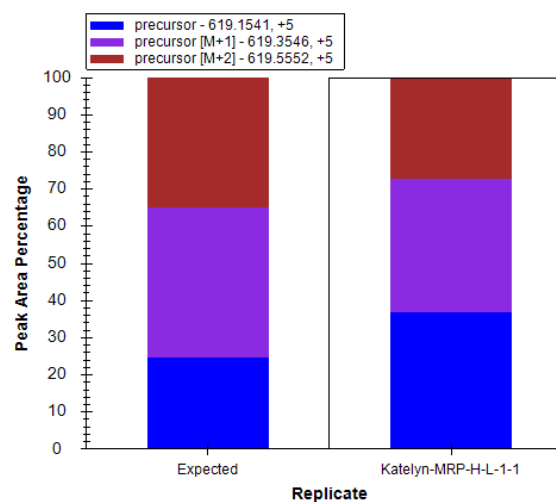

Replicate 2

# Rpl12ab

K.IQNmono**R**QAAASVVPSASSLVITALKEPPRDR.K [63, 91]

(missed 3)

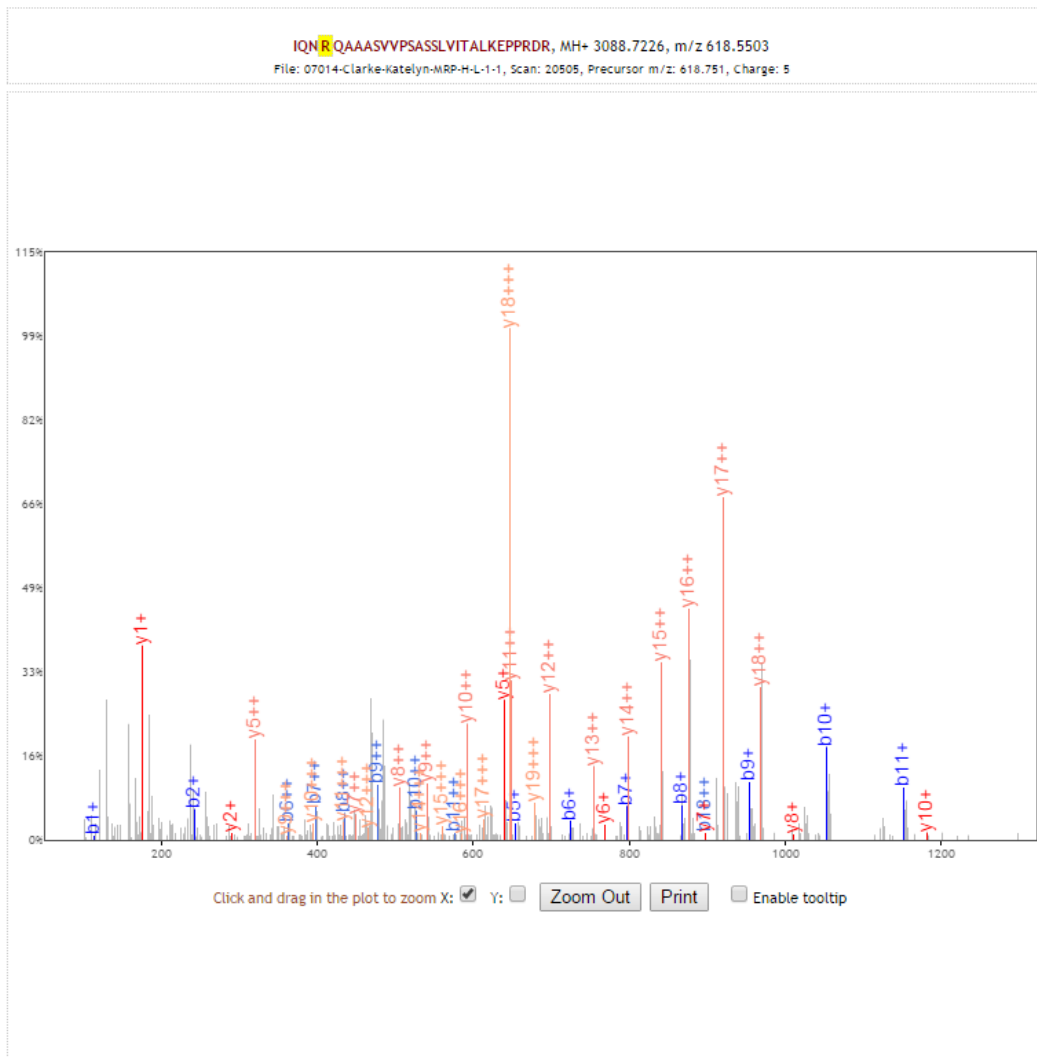

| b+        | b2+       | b3+      | #  | Seq # | y+        | y2+       | y3+      |
|-----------|-----------|----------|----|-------|-----------|-----------|----------|
| 114.0913  | 57.5493   | 38.7020  | 1  | I 29  |           |           |          |
| 242.1499  | 121.5786  | 81.3882  | 2  | Q 28  | 2975.6385 | 1488.3229 | 992.5510 |
| 356.1928  | 178.6001  | 119.4025 | 3  | N 27  | 2847.5800 | 1424.2936 | 949.8648 |
| 526.3097  | 263.6585  | 176.1081 | 4  | R 26  | 2733.5370 | 1367.2722 | 911.8505 |
| 654.3682  | 327.6878  | 218.7943 | 5  | Q 25  | 2563.4202 | 1282.2138 | 855.1449 |
| 725.4053  | 363.2063  | 242.4733 | 6  | A 24  | 2435.3616 | 1218.1845 | 812.4587 |
| 796.4425  | 398.7249  | 266.1523 | 7  | A 23  | 2364.3245 | 1182.6659 | 788.7797 |
| 867.4796  | 434.2434  | 289.8314 | 8  | A 22  | 2293.2874 | 1147.1473 | 765.1007 |
| 954.5116  | 477.7594  | 318.8421 | 9  | S 21  | 2222.2503 | 1111.6288 | 741.4216 |
| 1053.5800 | 527.2936  | 351.8649 | 10 | V 20  | 2135.2183 | 1068.1128 | 712.4109 |
| 1152.6484 | 576.8279  | 384.8877 | 11 | V 19  | 2036.1499 | 1018.5786 | 679.3881 |
| 1249.7012 | 625.3542  | 417.2386 | 12 | P 18  | 1937.0815 | 969.0444  | 646.3653 |
| 1336.7332 | 668.8702  | 446.2493 | 13 | S 17  | 1840.0287 | 920.5180  | 614.0144 |
| 1407.7703 | 704.3888  | 469.9283 | 14 | A 16  | 1752.9967 | 877.0020  | 585.0037 |
| 1494.8024 | 747.9048  | 498.9390 | 15 | S 15  | 1681.9595 | 841.4834  | 561.3247 |
| 1581.8344 | 791.4208  | 527.9496 | 16 | S 14  | 1594.9275 | 797.9674  | 532.3140 |
| 1694.9185 | 847.9629  | 565.6443 | 17 | L 13  | 1507.8955 | 754.4514  | 503.3033 |
| 1793.9869 | 897.4971  | 598.6671 | 18 | V 12  | 1394.8114 | 697.9094  | 465.6087 |
| 1907.0709 | 954.0391  | 636.3618 | 19 | I 11  | 1295.7430 | 648.3751  | 432.5859 |
| 2008.1186 | 1004.5629 | 670.0444 | 20 | T 10  | 1182.6589 | 591.8331  | 394.8912 |
| 2079.1557 | 1040.0815 | 693.7234 | 21 | A 9   | 1081.6113 | 541.3093  | 361.2086 |
| 2192.2398 | 1096.6235 | 731.4181 | 22 | L 8   | 1010.5742 | 505.7907  | 337.5296 |
| 2320.3348 | 1160.6710 | 774.1164 | 23 | K 7   | 897.4901  | 449.2487  | 299.8349 |
| 2449.3773 | 1225.1923 | 817.1306 | 24 | E 6   | 769.3951  | 385.2012  | 257.1366 |
| 2546.4301 | 1273.7187 | 849.4816 | 25 | P 5   | 640.3525  | 320.6799  | 214.1224 |
| 2643.4829 | 1322.2451 | 881.8325 | 26 | P 4   | 543.2998  | 272.1535  | 181.7714 |
| 2799.5840 | 1400.2956 | 933.8662 | 27 | R 3   | 446.2470  | 223.6271  | 149.4205 |
| 2914.6109 | 1457.8091 | 972.2085 | 28 | D 2   | 290.1459  | 145.5766  | 97.3868  |
|           |           |          | 29 | R 1   | 175.1190  | 88.0631   | 59.0445  |

[\[click\]](#) to move table

Static Modifications:  
 C: 57.02146

Variable Modifications:  
 R: 14.0157

# Rpl12ab

K.IQNmono**R**QAAASVVPSASSLVITALKEPPRDR.K [63, 91]  
(missed 3)

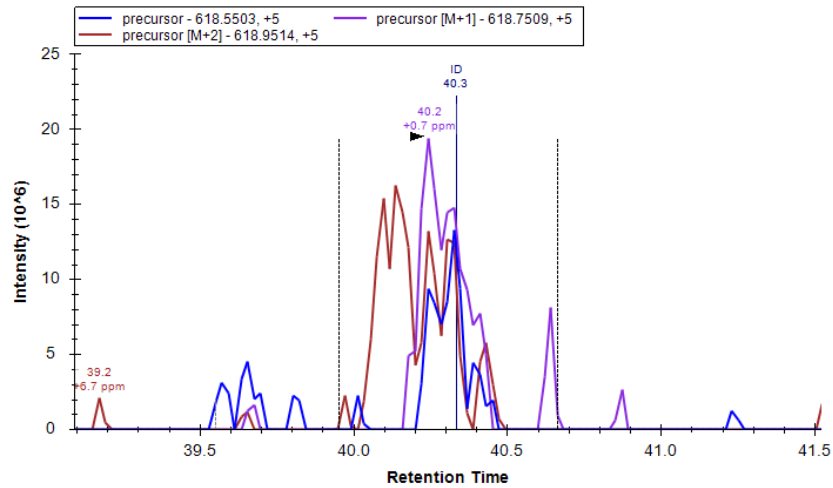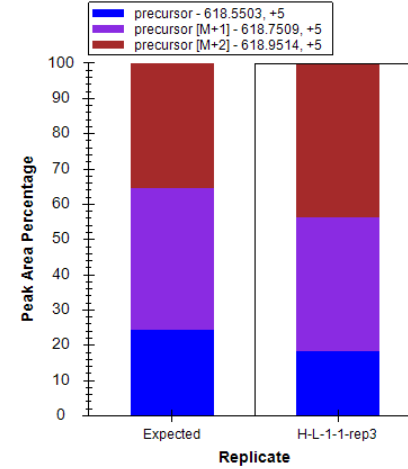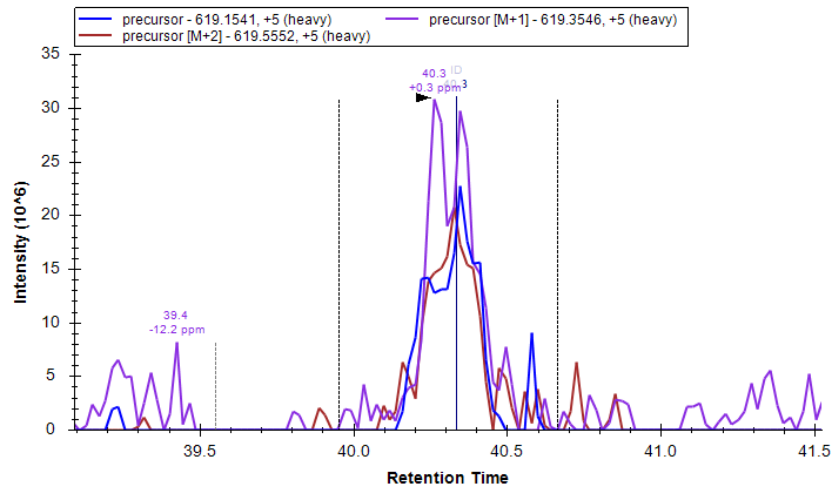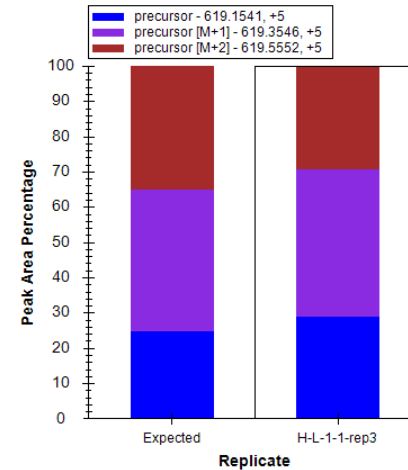

Replicate 3

# Rpl12ab

K.IQNmono**R**QAAASVVPSASSLVITALKEPPDR.K [63, 91]

(missed 3)

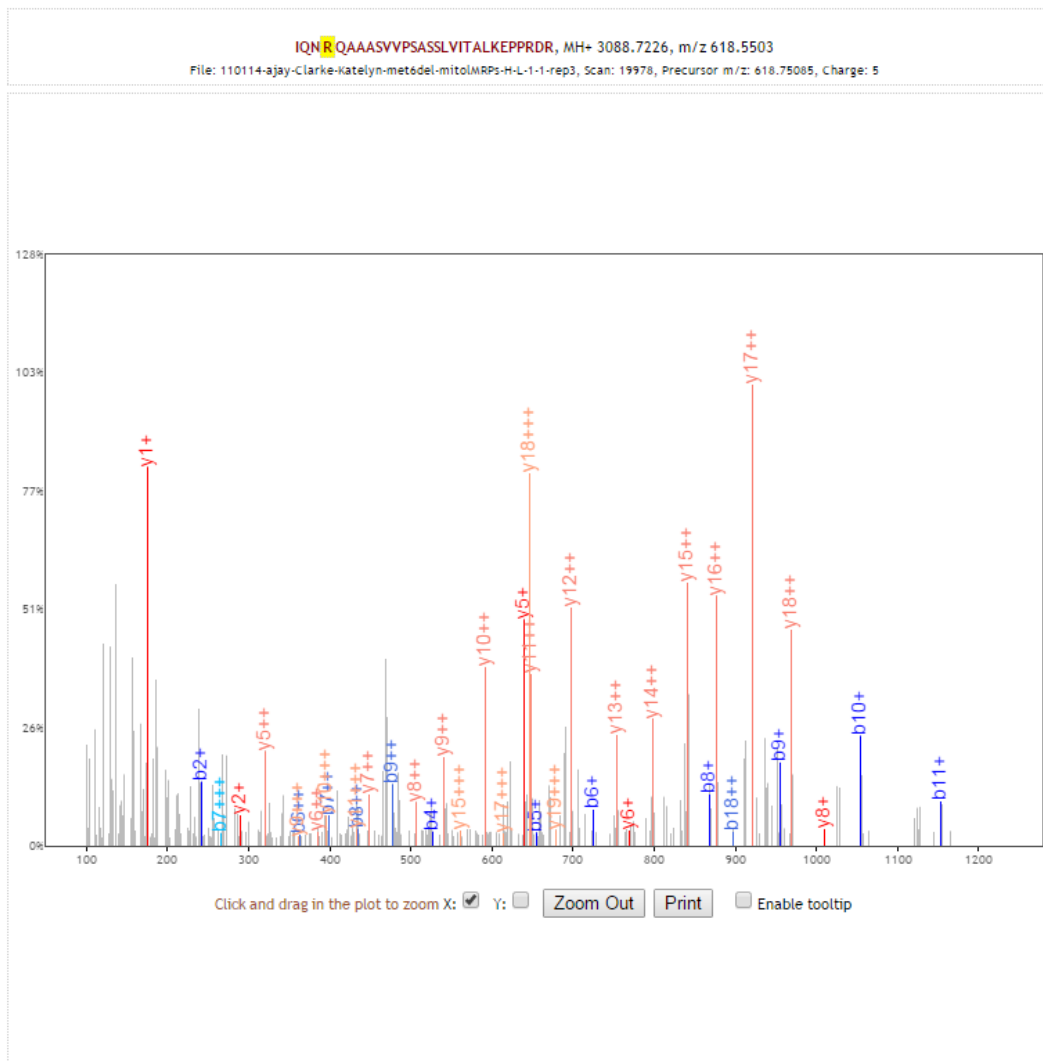

| b+        | b2+       | b3+      | #  | Seq # | y+        | y2+       | y3+      |
|-----------|-----------|----------|----|-------|-----------|-----------|----------|
| 114.0913  | 57.5493   | 38.7020  | 1  | I 29  |           |           |          |
| 242.1499  | 121.5786  | 81.3882  | 2  | Q 28  | 2975.6385 | 1488.3229 | 992.5510 |
| 356.1928  | 178.6001  | 119.4025 | 3  | N 27  | 2847.5800 | 1424.2936 | 949.8648 |
| 526.3097  | 263.6585  | 176.1081 | 4  | R 26  | 2733.5370 | 1367.2722 | 911.8505 |
| 654.3682  | 327.6878  | 218.7943 | 5  | Q 25  | 2563.4202 | 1282.2138 | 855.1449 |
| 725.4053  | 363.2063  | 242.4733 | 6  | A 24  | 2435.3616 | 1218.1845 | 812.4587 |
| 796.4425  | 398.7249  | 266.1523 | 7  | A 23  | 2364.3245 | 1182.6659 | 788.7797 |
| 867.4796  | 434.2434  | 289.8314 | 8  | A 22  | 2293.2874 | 1147.1473 | 765.1007 |
| 954.5116  | 477.7594  | 318.8421 | 9  | S 21  | 2222.2503 | 1111.6288 | 741.4216 |
| 1053.5800 | 527.2936  | 351.8649 | 10 | V 20  | 2135.2183 | 1068.1128 | 712.4109 |
| 1152.6484 | 576.8279  | 384.8877 | 11 | V 19  | 2036.1499 | 1018.5786 | 679.3881 |
| 1249.7012 | 625.3542  | 417.2386 | 12 | P 18  | 1937.0815 | 969.0444  | 646.3653 |
| 1336.7332 | 668.8702  | 446.2493 | 13 | S 17  | 1840.0287 | 920.5180  | 614.0144 |
| 1407.7703 | 704.3888  | 469.9283 | 14 | A 16  | 1752.9967 | 877.0020  | 585.0037 |
| 1494.8024 | 747.9048  | 498.9390 | 15 | S 15  | 1681.9595 | 841.4834  | 561.3247 |
| 1581.8344 | 791.4208  | 527.9496 | 16 | S 14  | 1594.9275 | 797.9674  | 532.3140 |
| 1694.9185 | 847.9629  | 565.6443 | 17 | L 13  | 1507.8955 | 754.4514  | 503.3033 |
| 1793.9869 | 897.4971  | 598.6671 | 18 | V 12  | 1394.8114 | 697.9094  | 465.6087 |
| 1907.0709 | 954.0391  | 636.3618 | 19 | I 11  | 1295.7430 | 648.3751  | 432.5859 |
| 2008.1186 | 1004.5629 | 670.0444 | 20 | T 10  | 1182.6589 | 591.8331  | 394.8912 |
| 2079.1557 | 1040.0815 | 693.7234 | 21 | A 9   | 1081.6113 | 541.3093  | 361.2086 |
| 2192.2398 | 1096.6235 | 731.4181 | 22 | L 8   | 1010.5742 | 505.7907  | 337.5296 |
| 2320.3348 | 1160.6710 | 774.1164 | 23 | K 7   | 897.4901  | 449.2487  | 299.8349 |
| 2449.3773 | 1225.1923 | 817.1306 | 24 | E 6   | 769.3951  | 385.2012  | 257.1366 |
| 2546.4301 | 1273.7187 | 849.4816 | 25 | P 5   | 640.3525  | 320.6799  | 214.1224 |
| 2643.4829 | 1322.2451 | 881.8325 | 26 | P 4   | 543.2998  | 272.1535  | 181.7714 |
| 2799.5840 | 1400.2956 | 933.8662 | 27 | R 3   | 446.2470  | 223.6271  | 149.4205 |
| 2914.6109 | 1457.8091 | 972.2085 | 28 | D 2   | 290.1459  | 145.5766  | 97.3868  |
|           |           |          | 29 | R 1   | 175.1190  | 88.0631   | 59.0445  |

[\[Click\]](#) to move table  
Static Modifications:  
C: 57.02146  
Variable Modifications:  
R: 14.0157

# Rpl42ab

## R.KQSGFGGQTmono**K**PVFHK.K [45, 59] (missed 1)

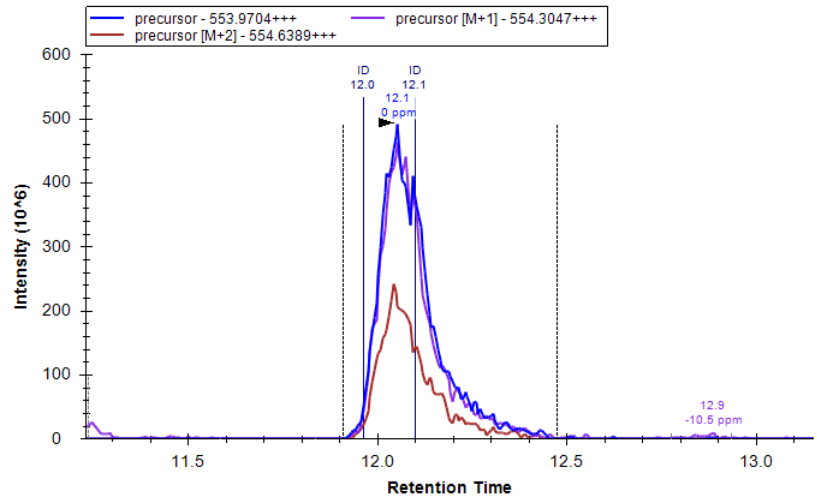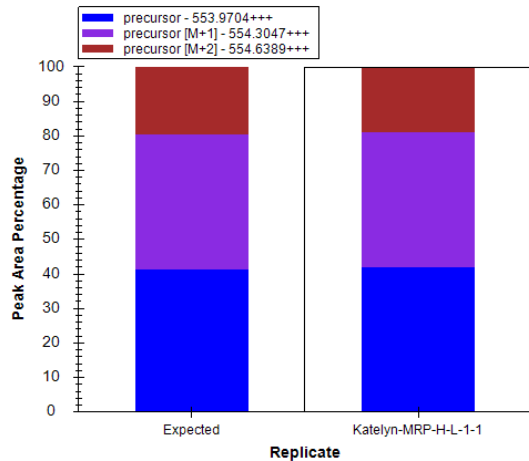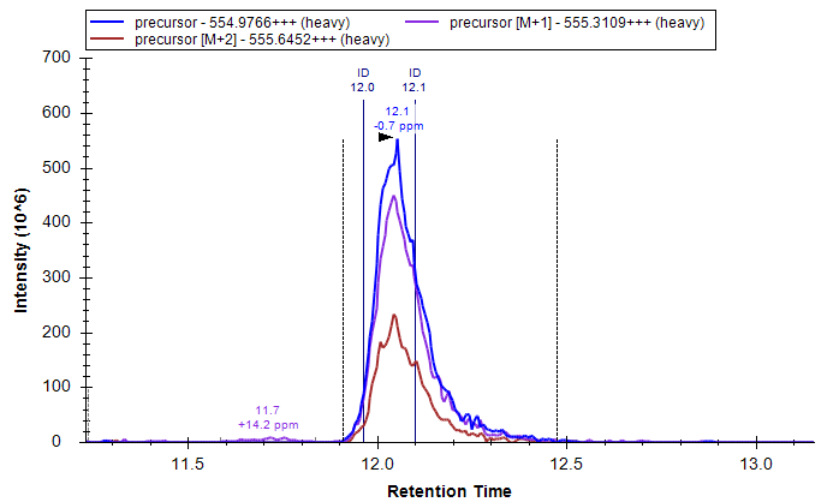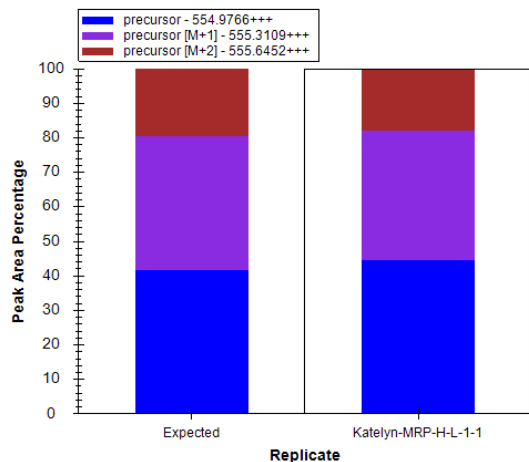

# Rpl42ab

## R.KQSGFGGQTmono**K**PVFHK.K [45, 59] (missed 1)

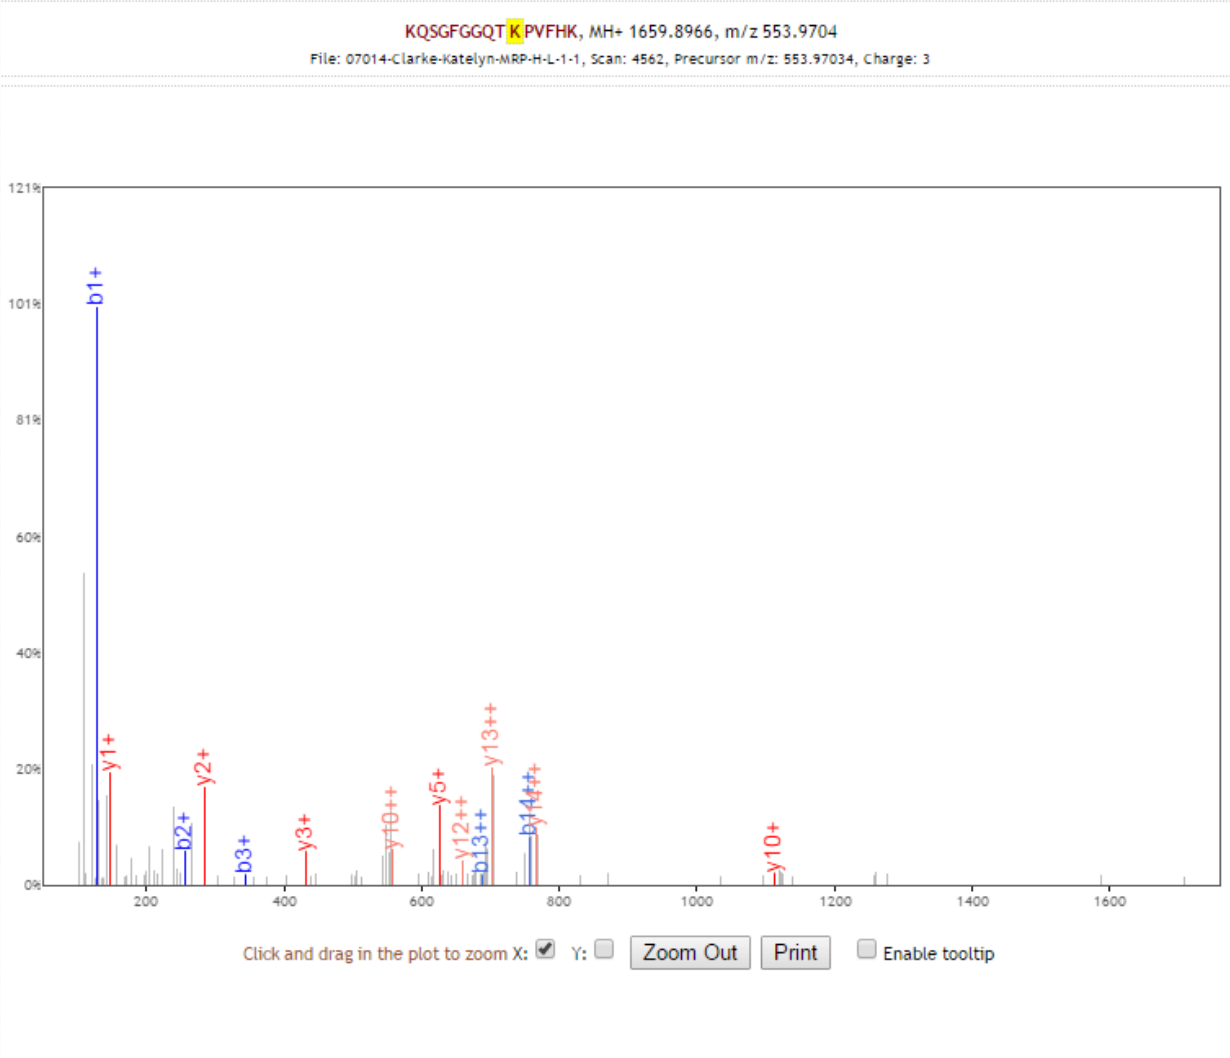

| b+        | b2+      | #  | Seq # | y+        | y2+      |
|-----------|----------|----|-------|-----------|----------|
| 129.1022  | 65.0548  | 1  | K 15  |           |          |
| 257.1608  | 129.0840 | 2  | Q 14  | 1531.8016 | 766.4045 |
| 344.1928  | 172.6001 | 3  | S 13  | 1403.7431 | 702.3752 |
| 401.2143  | 201.1108 | 4  | G 12  | 1316.7110 | 658.8592 |
| 548.2827  | 274.6450 | 5  | F 11  | 1259.6896 | 630.3484 |
| 605.3042  | 303.1557 | 6  | G 10  | 1112.6212 | 556.8142 |
| 662.3257  | 331.6665 | 7  | G 9   | 1055.5997 | 528.3035 |
| 790.3842  | 395.6958 | 8  | Q 8   | 998.5782  | 499.7928 |
| 891.4319  | 446.2196 | 9  | T 7   | 870.5196  | 435.7635 |
| 1033.5426 | 517.2749 | 10 | K 6   | 769.4720  | 385.2396 |
| 1130.5953 | 565.8013 | 11 | P 5   | 627.3613  | 314.1843 |
| 1229.6637 | 615.3355 | 12 | V 4   | 530.3085  | 265.6579 |
| 1376.7322 | 688.8697 | 13 | F 3   | 431.2401  | 216.1237 |
| 1513.7911 | 757.3992 | 14 | H 2   | 284.1717  | 142.5895 |
|           |          | 15 | K 1   | 147.1128  | 74.0600  |

[\[click\]](#) to move table  
 Static Modifications:  
 C: 57.02146  
 Variable Modifications:  
 K: 14.0157



# Rpl42ab

## R.KQSGFGGQTmono**K**PVFHK.K [45, 59] (missed 1)

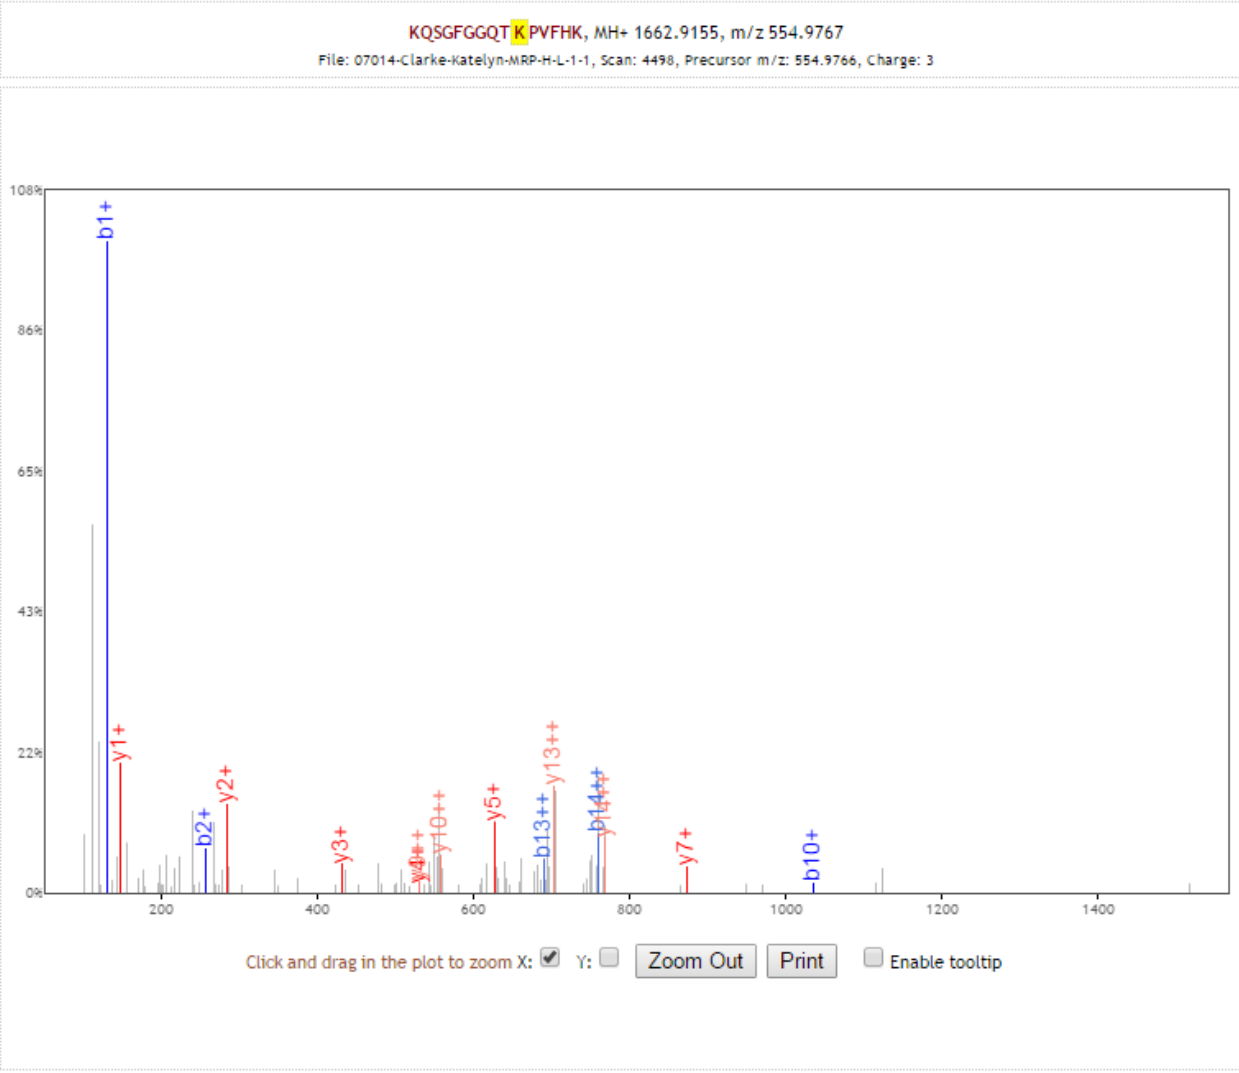

| b+        | b2+      | #  | Seq | #  | y+        | y2+      |
|-----------|----------|----|-----|----|-----------|----------|
| 129.1022  | 65.0548  | 1  | K   | 15 |           |          |
| 257.1608  | 129.0840 | 2  | Q   | 14 | 1534.8205 | 767.9139 |
| 344.1928  | 172.6001 | 3  | S   | 13 | 1406.7620 | 703.8846 |
| 401.2143  | 201.1108 | 4  | G   | 12 | 1319.7299 | 660.3686 |
| 548.2827  | 274.6450 | 5  | F   | 11 | 1262.7085 | 631.8579 |
| 605.3042  | 303.1557 | 6  | G   | 10 | 1115.6401 | 558.3237 |
| 662.3257  | 331.6665 | 7  | G   | 9  | 1058.6186 | 529.8129 |
| 790.3842  | 395.6958 | 8  | Q   | 8  | 1001.5971 | 501.3022 |
| 891.4319  | 446.2196 | 9  | T   | 7  | 873.5385  | 437.2729 |
| 1036.5615 | 518.7844 | 10 | K   | 6  | 772.4909  | 386.7491 |
| 1133.6142 | 567.3108 | 11 | P   | 5  | 627.3613  | 314.1843 |
| 1232.6826 | 616.8450 | 12 | V   | 4  | 530.3085  | 265.6579 |
| 1379.7511 | 690.3792 | 13 | F   | 3  | 431.2401  | 216.1237 |
| 1516.8100 | 758.9086 | 14 | H   | 2  | 284.1717  | 142.5895 |
|           |          | 15 | K   | 1  | 147.1128  | 74.0600  |

[\[Click\]](#) to move table

Static Modifications:  
 C: 57.02146  
 M: 3.0189

Variable Modifications:  
 K: 17.0346

# Rpl42ab

K.QSGFGGQTmono**K**PVFHK.K [46, 59]

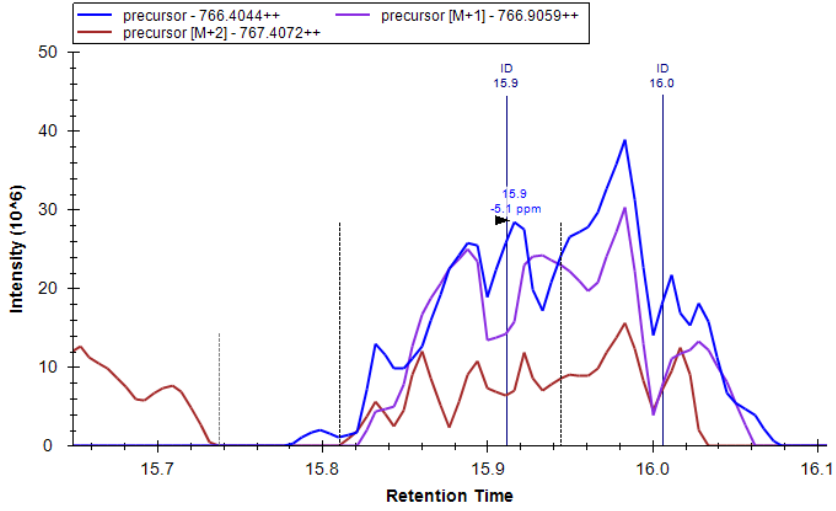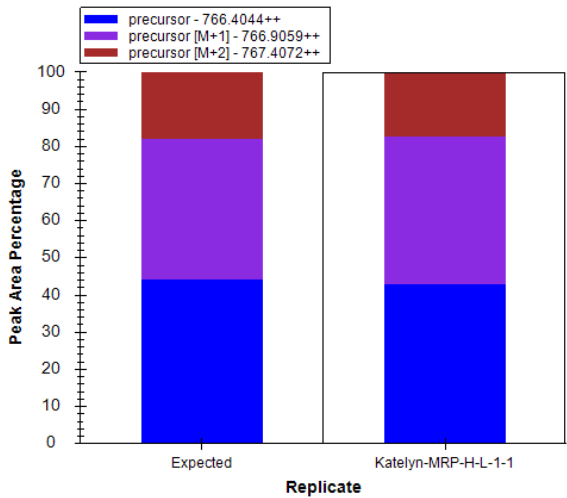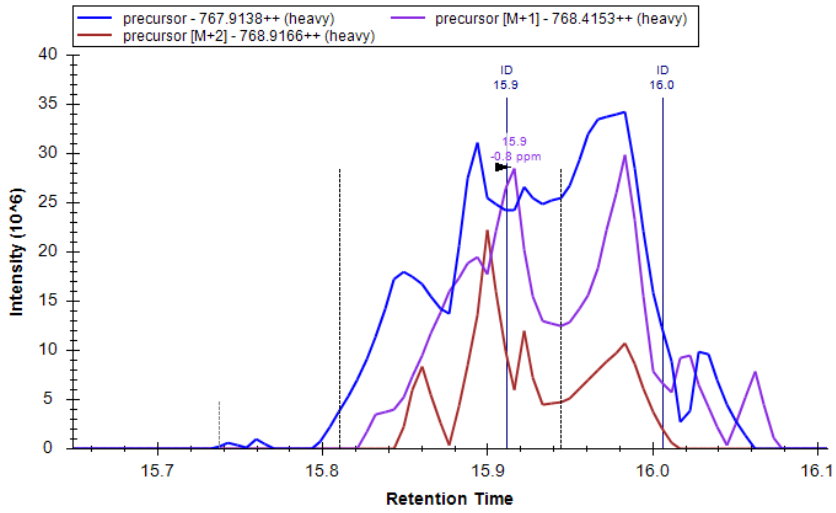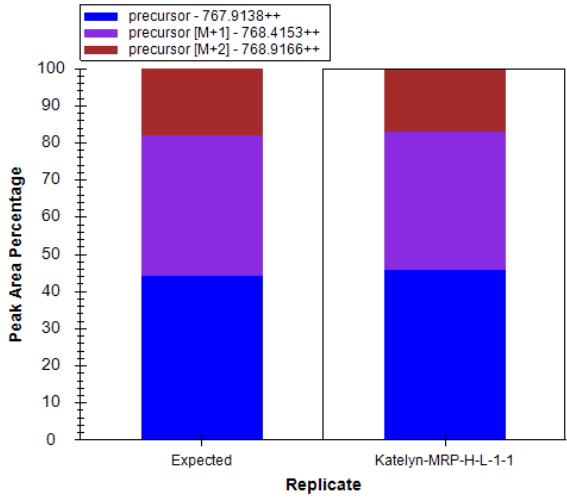

Replicate 2

# Rpl42ab

K.QSGFGGQTmono**K**PVFHK.K [46, 59]

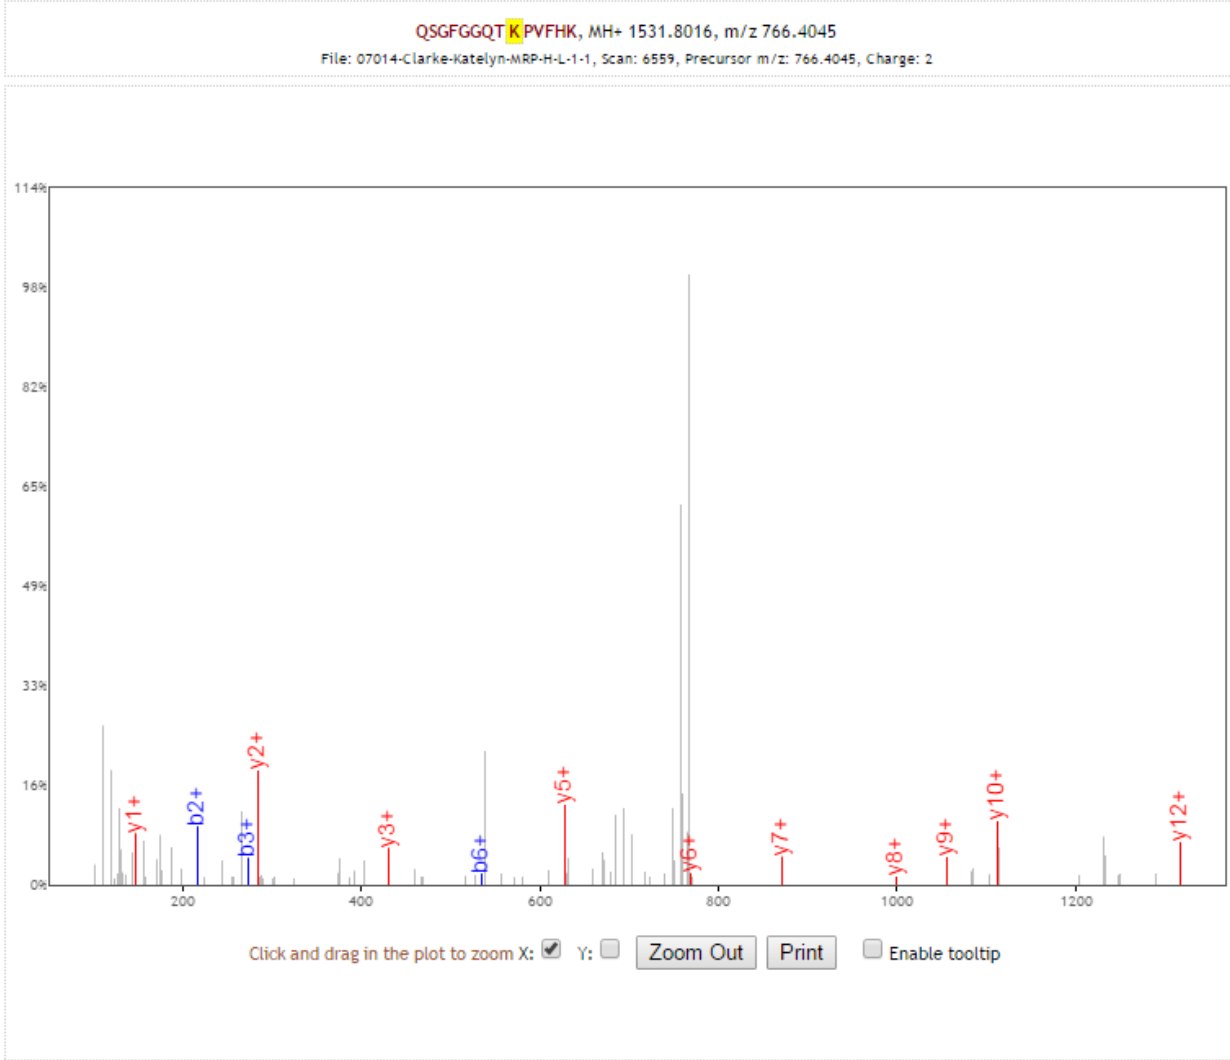

| b+        | #  | Seq #      | y+        |
|-----------|----|------------|-----------|
| 129.0659  | 1  | Q 14       |           |
| 216.0979  | 2  | S 13       | 1403.7431 |
| 273.1193  | 3  | G 12       | 1316.7110 |
| 420.1878  | 4  | F 11       | 1259.6896 |
| 477.2092  | 5  | G 10       | 1112.6212 |
| 534.2307  | 6  | G 9        | 1055.5997 |
| 662.2893  | 7  | Q 8        | 998.5782  |
| 763.3369  | 8  | T 7        | 870.5196  |
| 905.4476  | 9  | <b>K</b> 6 | 769.4720  |
| 1002.5004 | 10 | P 5        | 627.3613  |
| 1101.5688 | 11 | V 4        | 530.3085  |
| 1248.6372 | 12 | F 3        | 431.2401  |
| 1385.6961 | 13 | H 2        | 284.1717  |
|           | 14 | K 1        | 147.1128  |

[\[Click\]](#) to move table

Static Modifications:  
C: 57.02146

Variable Modifications:  
K: 14.0157

# Rpl42ab

K.QSGFGGQTmono**K**PVFHK.K [46, 59]

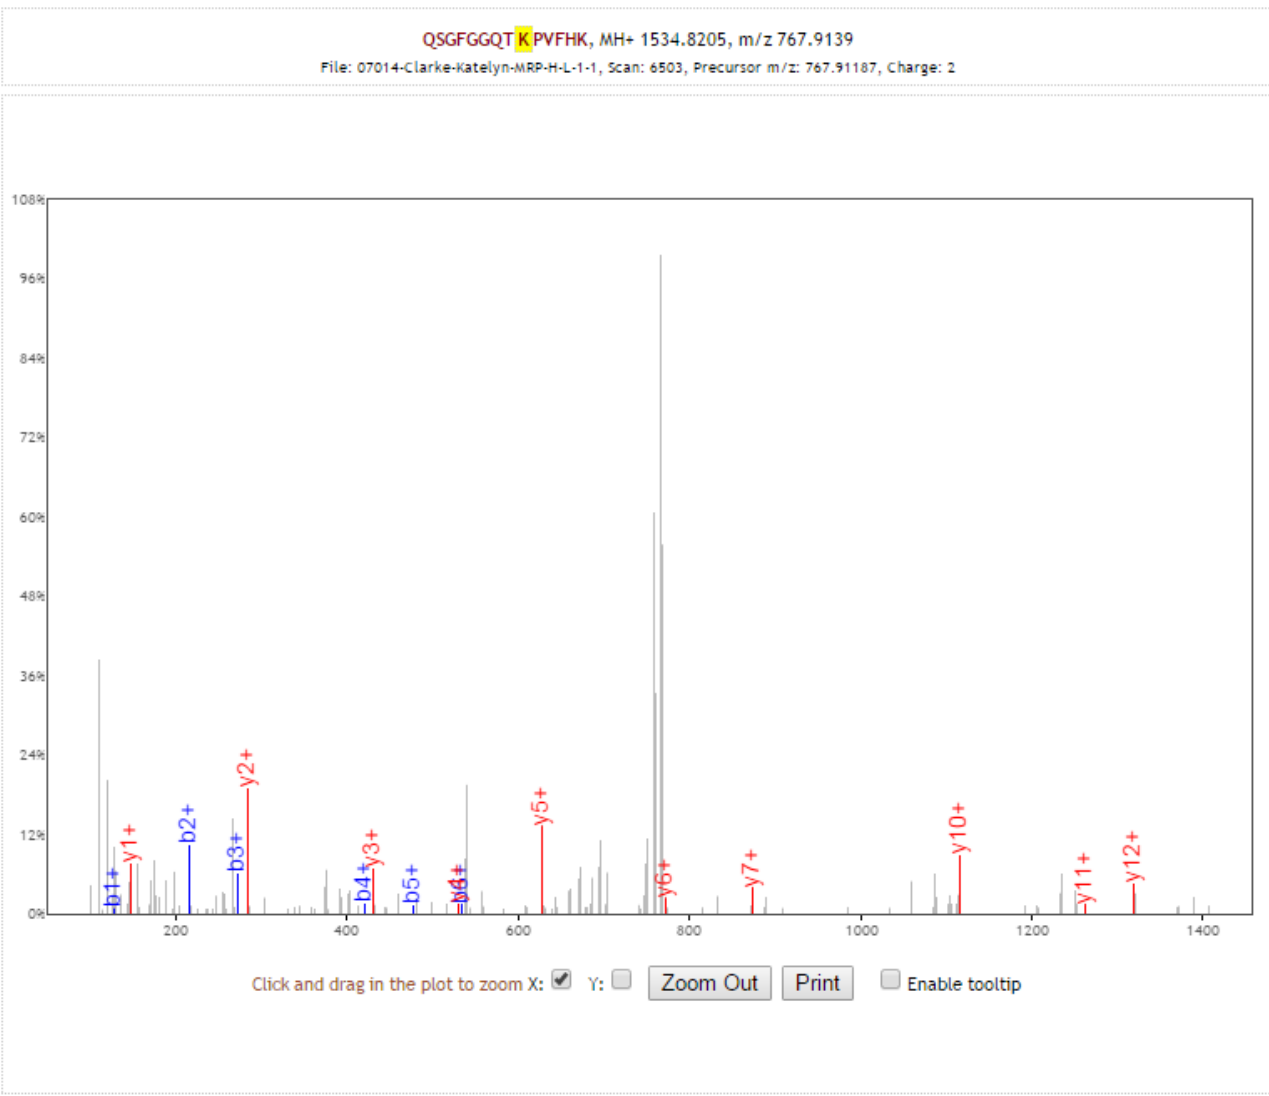

| b+        | #  | Seq #      | y+        |
|-----------|----|------------|-----------|
| 129.0659  | 1  | Q 14       |           |
| 216.0979  | 2  | S 13       | 1406.7620 |
| 273.1193  | 3  | G 12       | 1319.7299 |
| 420.1878  | 4  | F 11       | 1262.7085 |
| 477.2092  | 5  | G 10       | 1115.6401 |
| 534.2307  | 6  | G 9        | 1058.6186 |
| 662.2893  | 7  | Q 8        | 1001.5971 |
| 763.3369  | 8  | T 7        | 873.5385  |
| 908.4665  | 9  | <b>K</b> 6 | 772.4909  |
| 1005.5193 | 10 | P 5        | 627.3613  |
| 1104.5877 | 11 | V 4        | 530.3085  |
| 1251.6561 | 12 | F 3        | 431.2401  |
| 1388.7150 | 13 | H 2        | 284.1717  |
|           | 14 | K 1        | 147.1128  |

[\[Click\]](#) to move table

Static Modifications:  
 C: 57.02146  
 M: 3.0189

Variable Modifications:  
 K: 17.0346

# Pdb1

## R.EALNSAMAEELDmonoRDDDVFLIGEEVAQYNGAYK.V [42, 73] (missed 1)

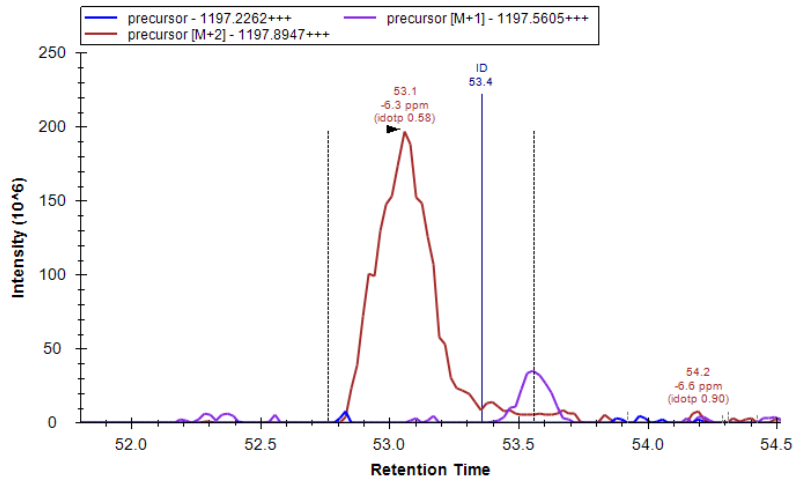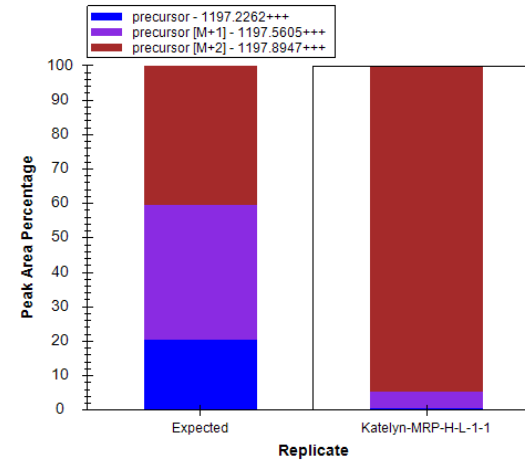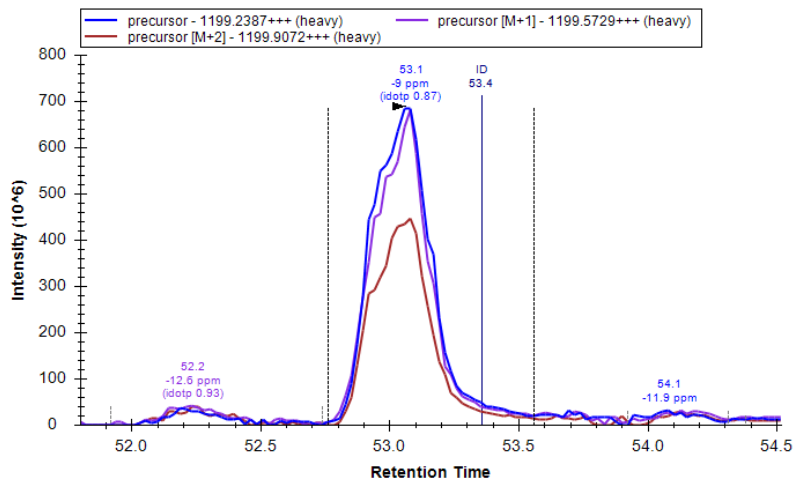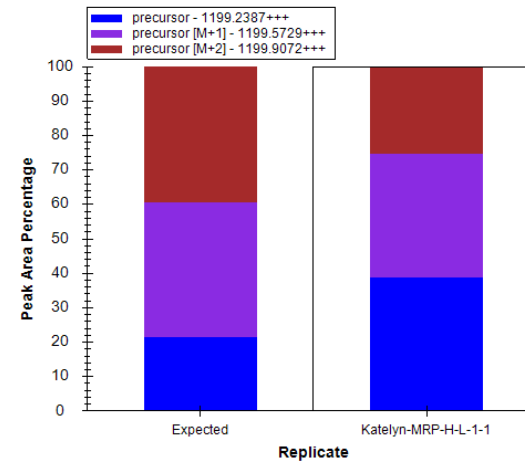

Replicate 2

# Pdb1

## R.EALNSAMAEELDmono**R**DDDVFLIGEEVAQYNGAYK.V [42, 73] (missed 1)

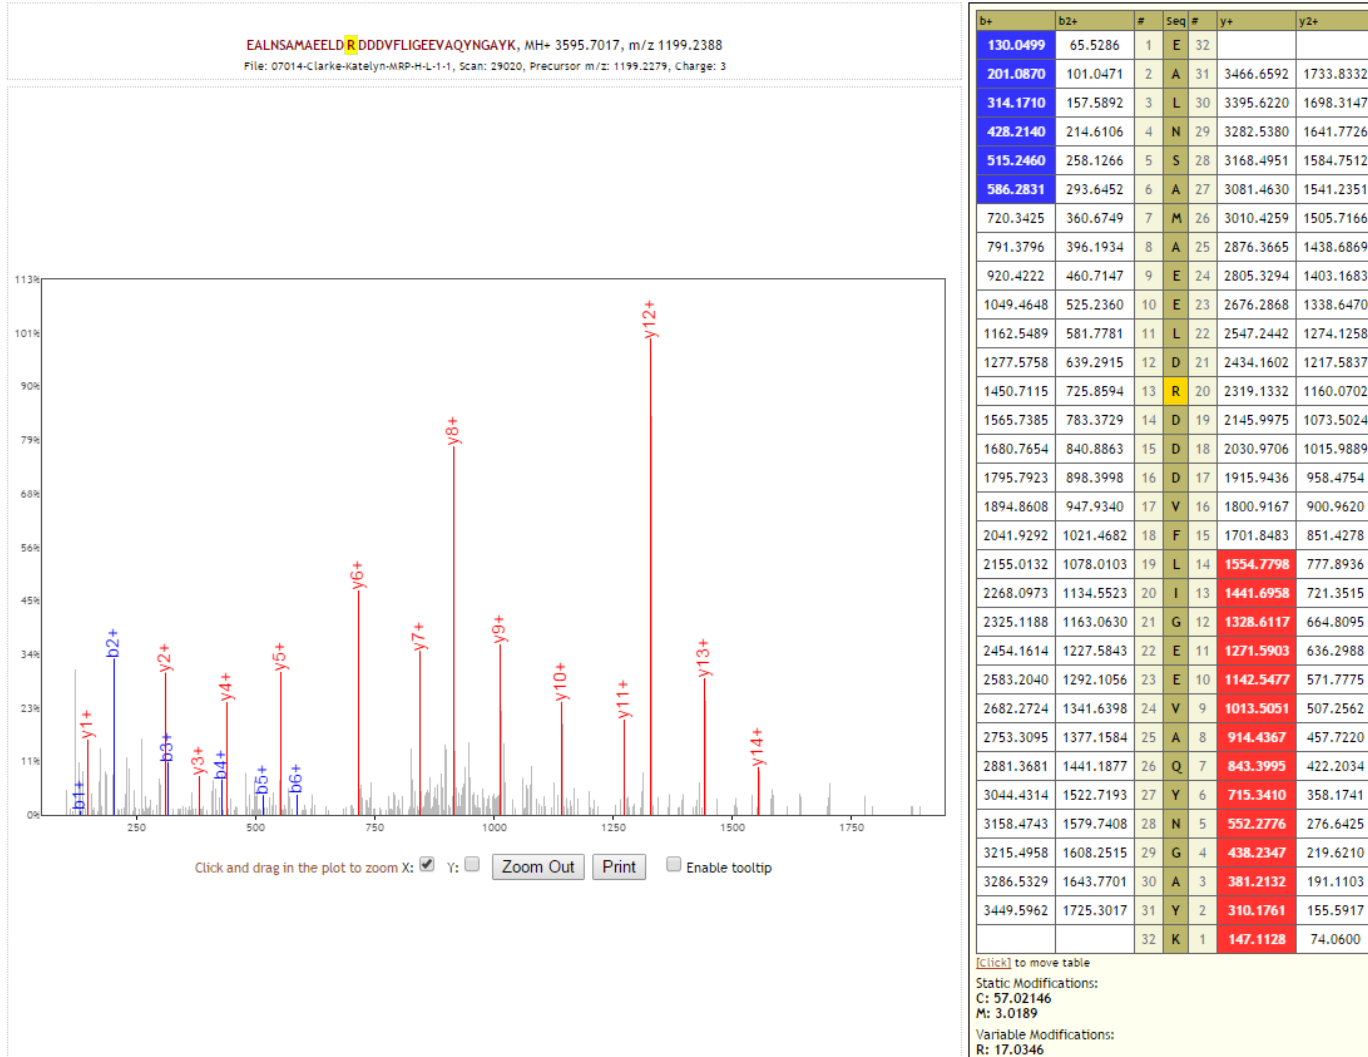

# Ecm10

## R.NAIETANmonoKADQLANDTENSIFEGK.L [550, 575] (missed 2)

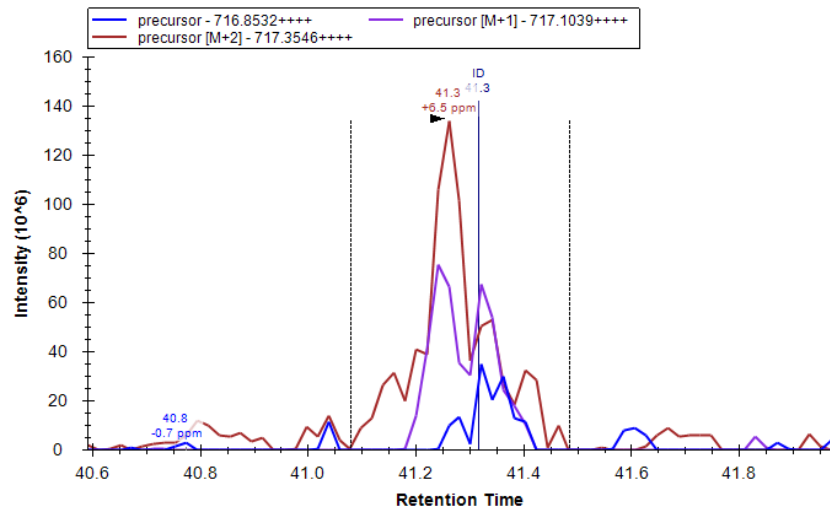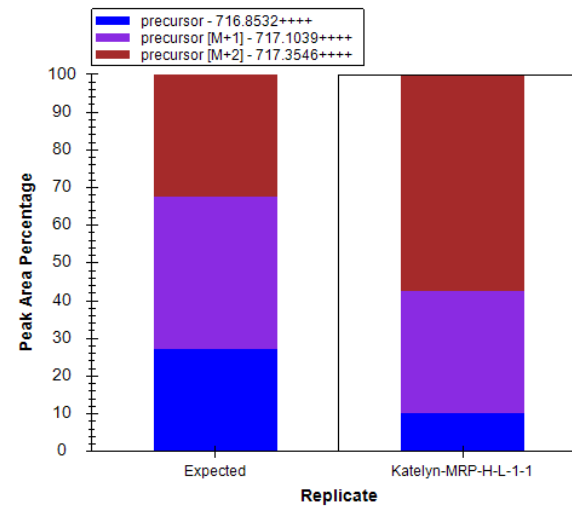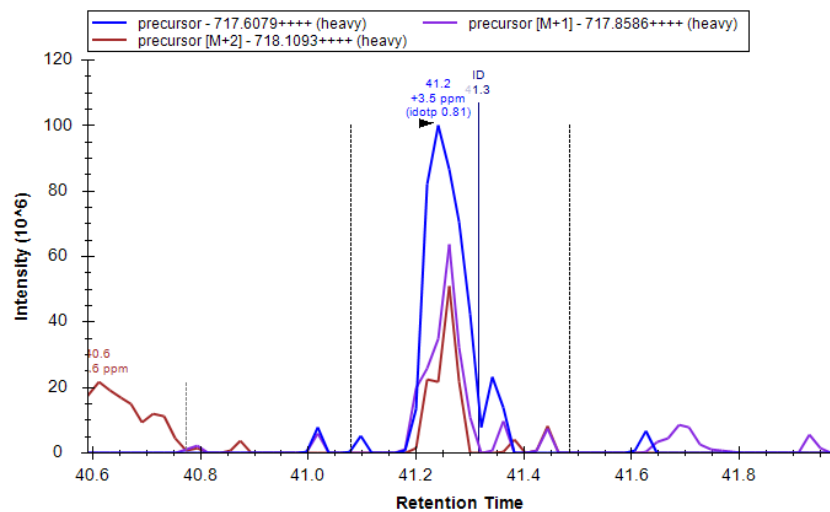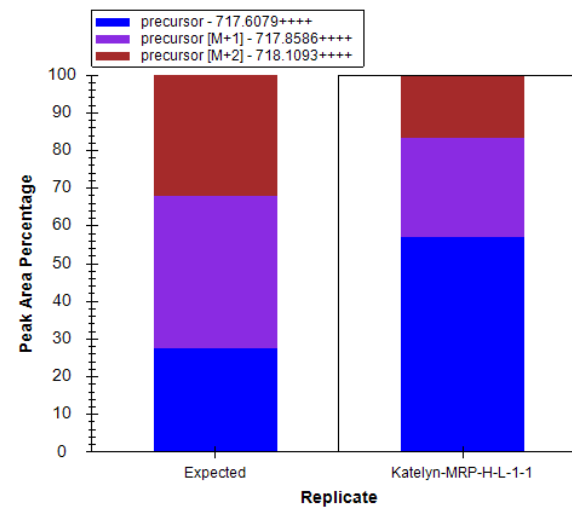

Replicate 2

# Ecm10

## R.NAIETANmono**K**ADQLANDTENSIFEGK.L [550, 575] (missed 2)

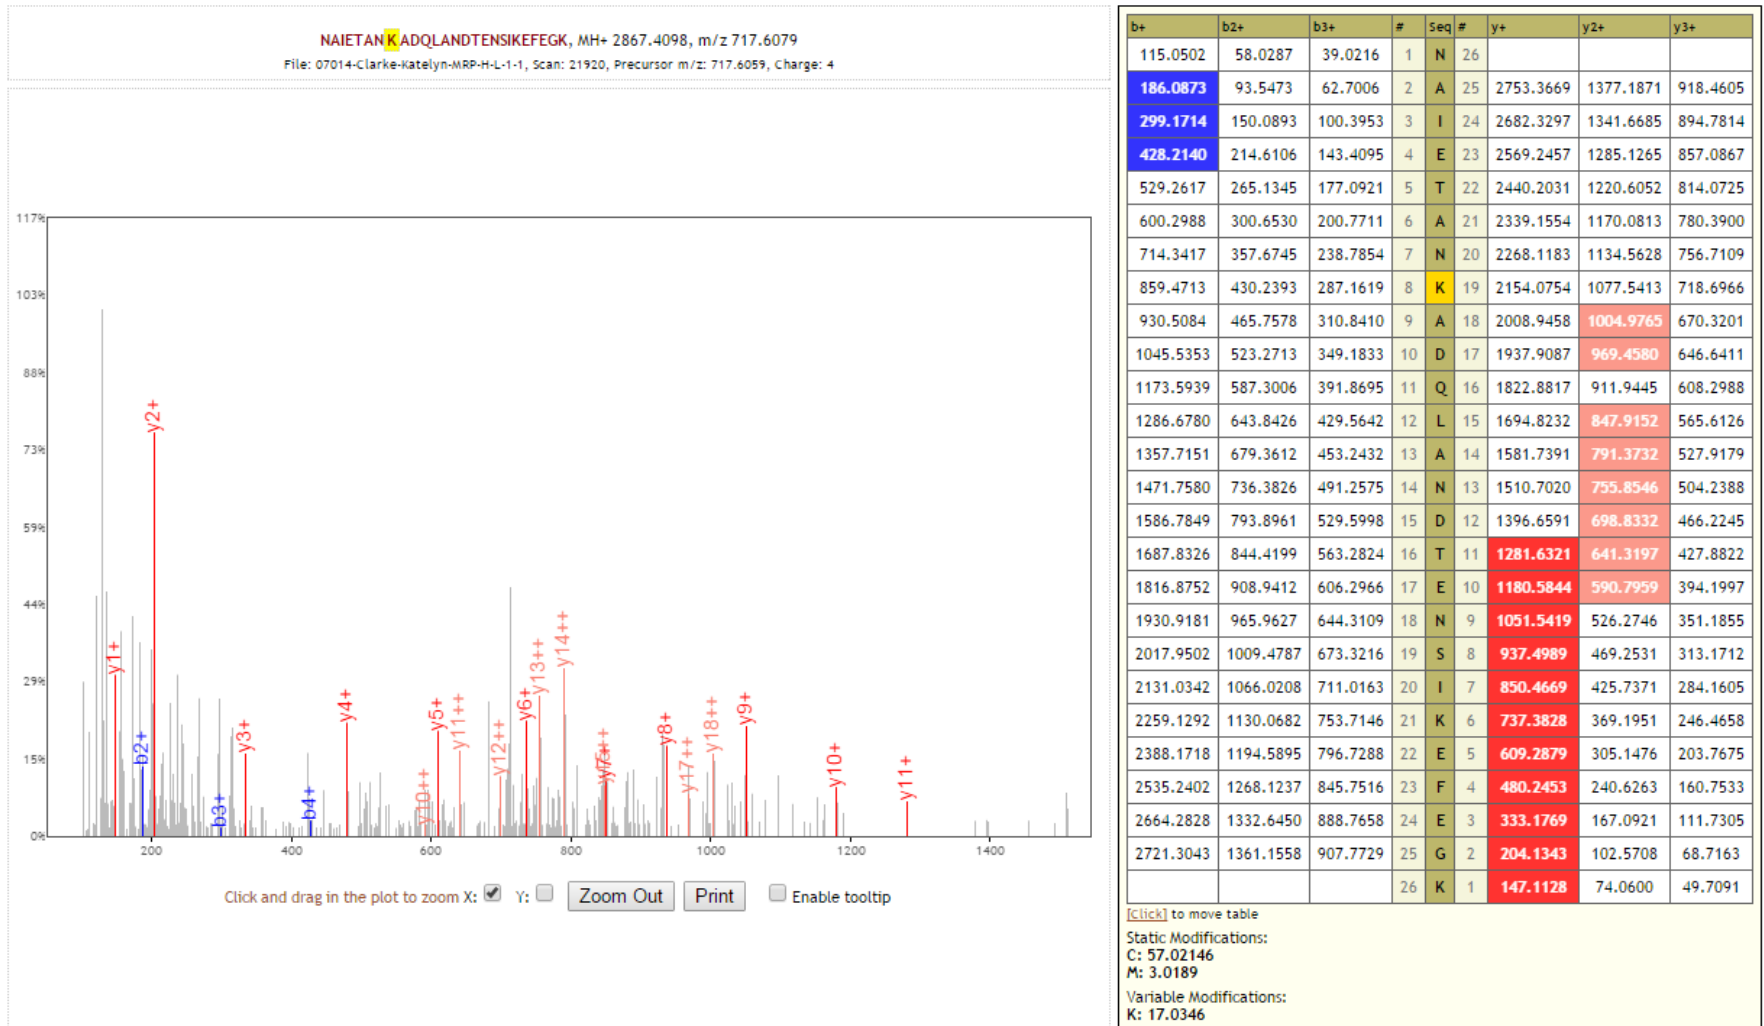

Replicate 2



# Pst2

## K.VAGCFVSTGTGGGNEATIMNSLSTLAHHGIIFVPLGYmonoK.N

### [106, 143]

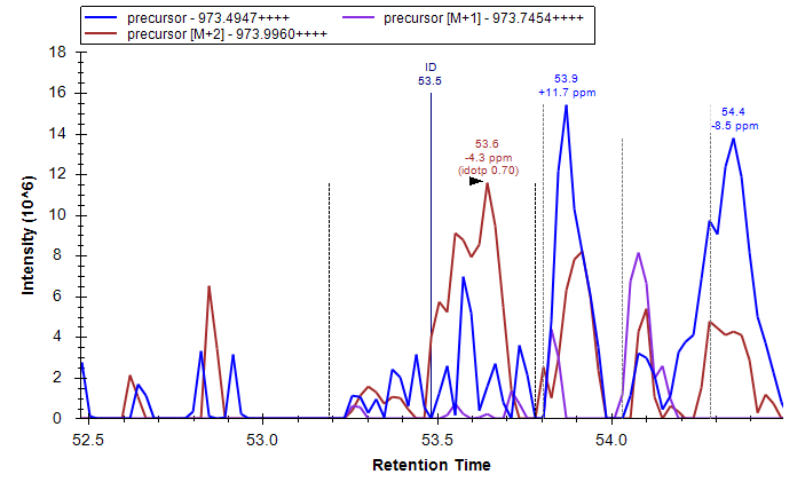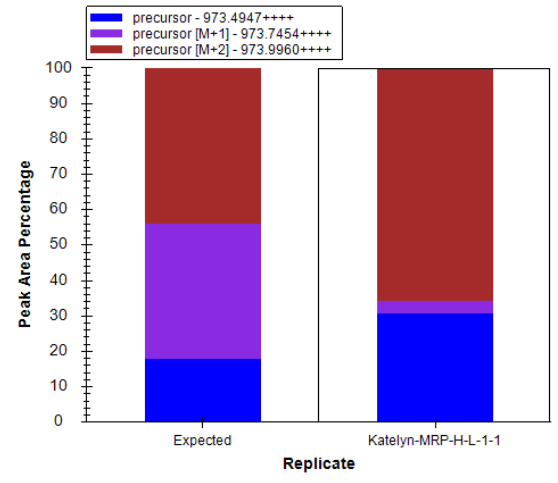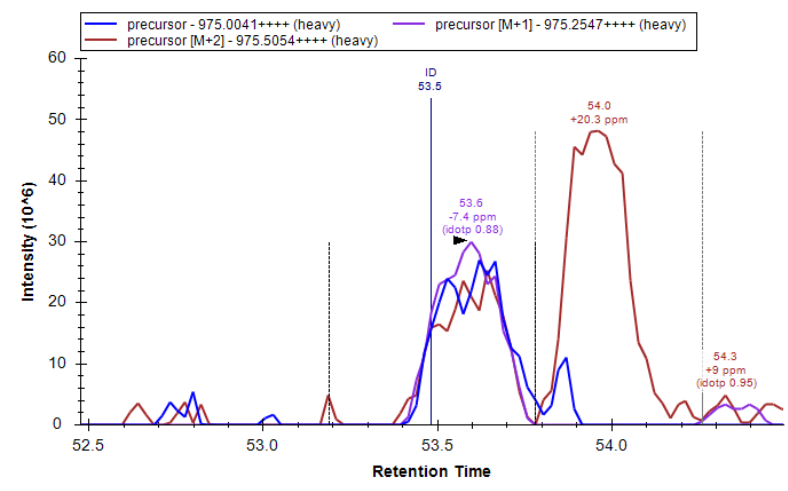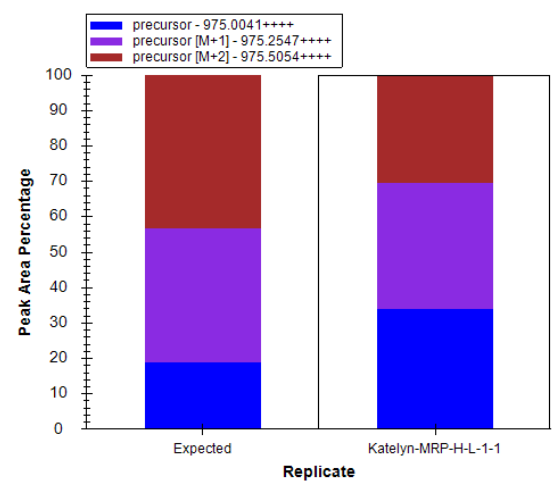

Replicate 2

# Pst2

## K.VAGCFVSTGTGGGNEATIMNSLSTLAHHGIIFVPLGYmonoK.N

### [106, 143]

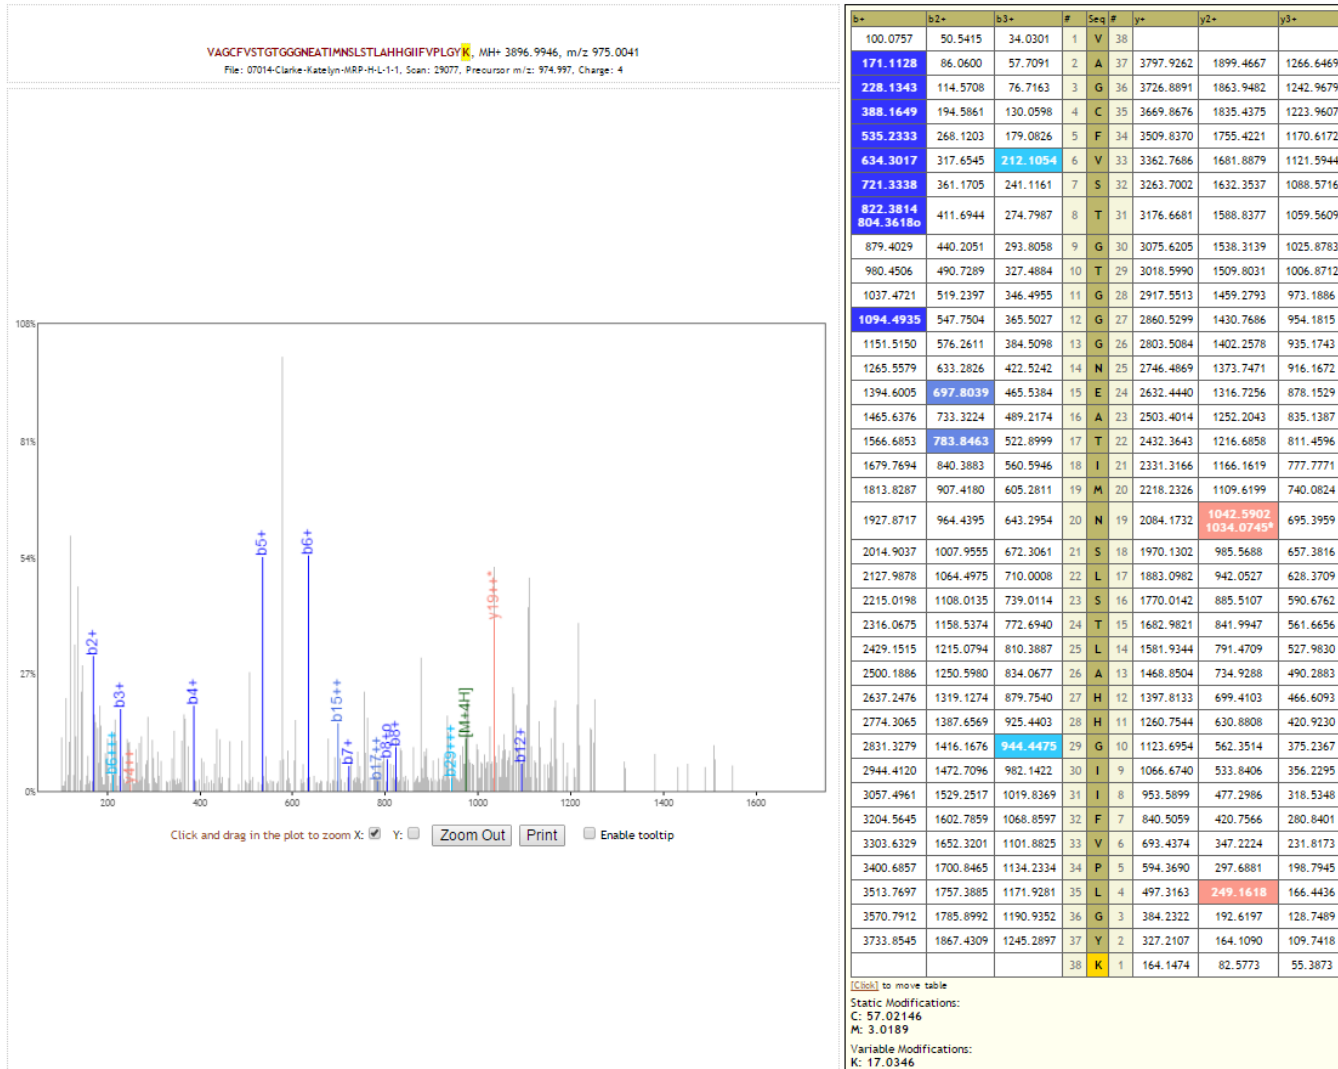

Replicate 2

# Ssa4

K.mono**K**SEVFSTYADNQPGLIQVFEGER.T [421, 444] (missed 1)

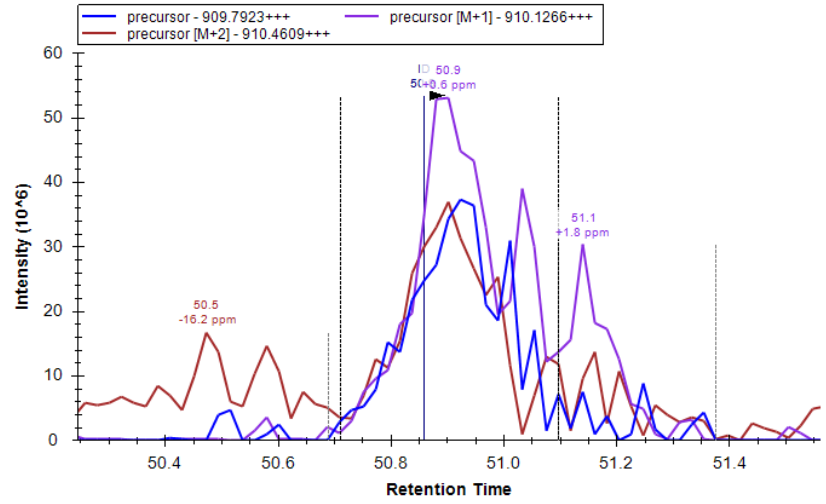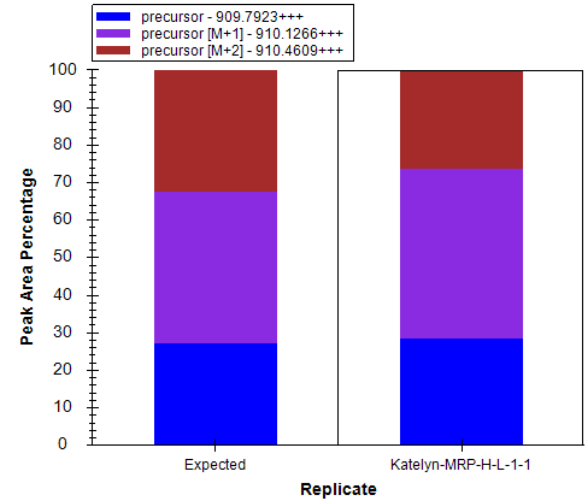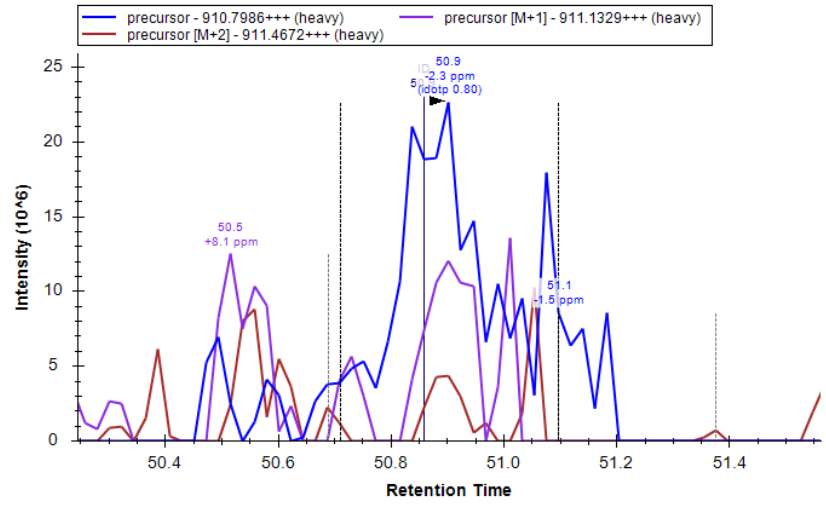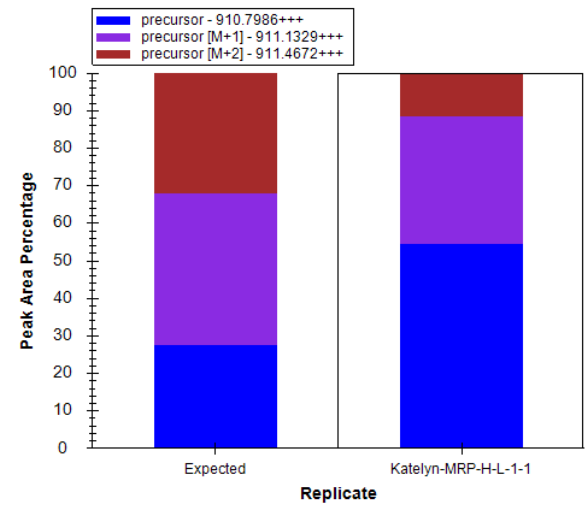

Replicate 2

# Ssa4

## K.mono**K**SEVFSTYADNQPGLIQVFEGE.R.T [421, 444] (missed 1)

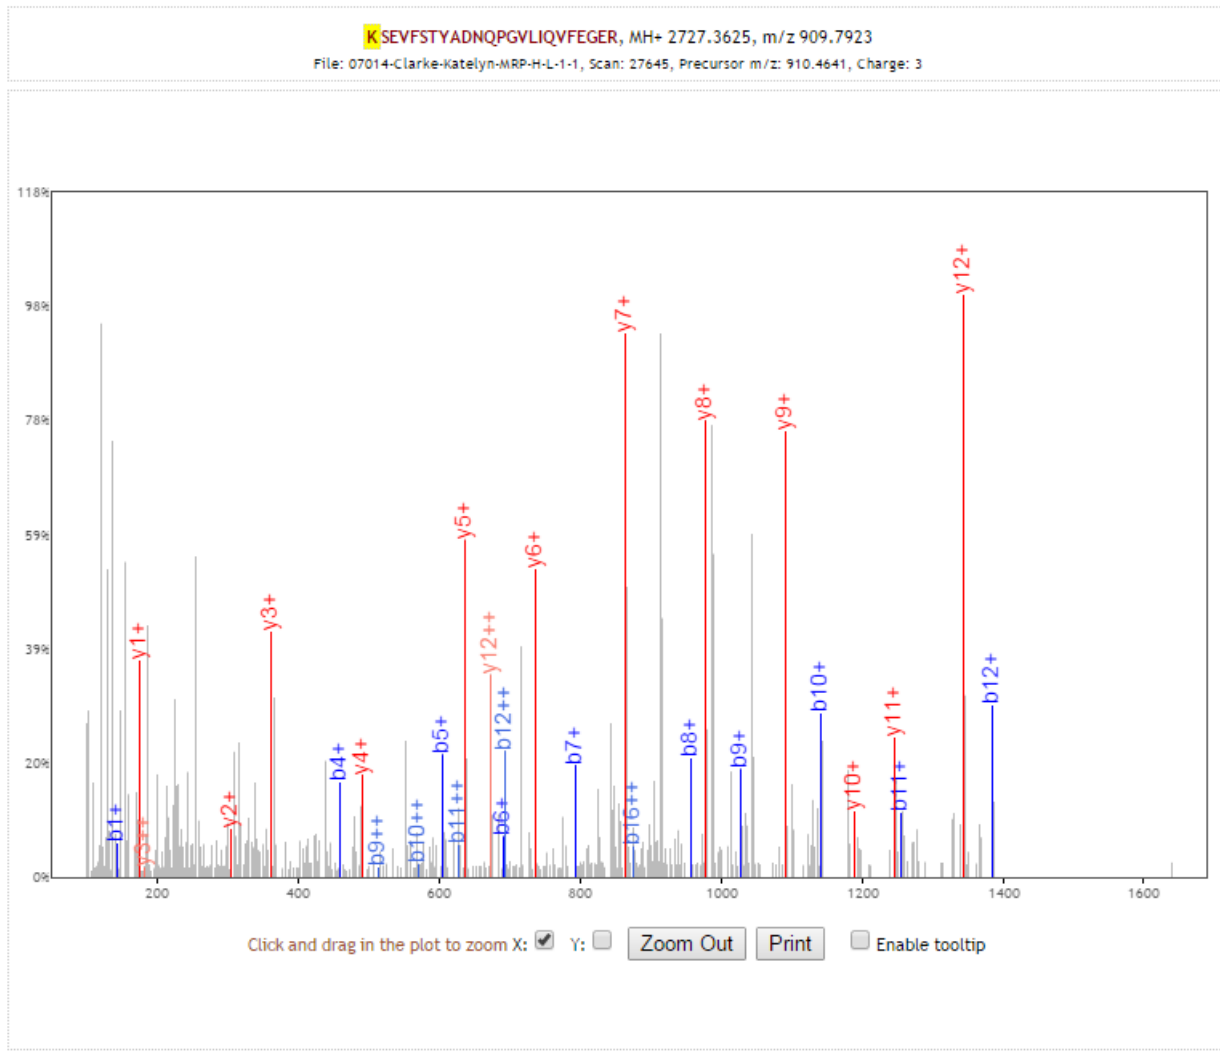

| b+        | b2+       | #  | Seq | #  | y+        | y2+       |
|-----------|-----------|----|-----|----|-----------|-----------|
| 143.1179  | 72.0626   | 1  | K   | 24 |           |           |
| 230.1500  | 115.5786  | 2  | S   | 23 | 2585.2518 | 1293.1295 |
| 359.1926  | 180.0999  | 3  | E   | 22 | 2498.2198 | 1249.6135 |
| 458.2610  | 229.6341  | 4  | V   | 21 | 2369.1772 | 1185.0922 |
| 605.3294  | 303.1683  | 5  | F   | 20 | 2270.1088 | 1135.5580 |
| 692.3614  | 346.6843  | 6  | S   | 19 | 2123.0404 | 1062.0238 |
| 793.4091  | 397.2082  | 7  | T   | 18 | 2036.0083 | 1018.5078 |
| 956.4724  | 478.7399  | 8  | Y   | 17 | 1934.9607 | 967.9840  |
| 1027.5095 | 514.2584  | 9  | A   | 16 | 1771.8973 | 886.4523  |
| 1142.5365 | 571.7719  | 10 | D   | 15 | 1700.8602 | 850.9338  |
| 1256.5794 | 628.7933  | 11 | N   | 14 | 1585.8333 | 793.4203  |
| 1384.6380 | 692.8226  | 12 | Q   | 13 | 1471.7904 | 736.3988  |
| 1481.6907 | 741.3490  | 13 | P   | 12 | 1343.7318 | 672.3695  |
| 1538.7122 | 769.8597  | 14 | G   | 11 | 1246.6790 | 623.8431  |
| 1637.7806 | 819.3940  | 15 | V   | 10 | 1189.6575 | 595.3324  |
| 1750.8647 | 875.9360  | 16 | L   | 9  | 1090.5891 | 545.7982  |
| 1863.9488 | 932.4780  | 17 | I   | 8  | 977.5051  | 489.2562  |
| 1992.0073 | 996.5073  | 18 | Q   | 7  | 864.4210  | 432.7141  |
| 2091.0757 | 1046.0415 | 19 | V   | 6  | 736.3624  | 368.6849  |
| 2238.1442 | 1119.5757 | 20 | F   | 5  | 637.2940  | 319.1506  |
| 2367.1868 | 1184.0970 | 21 | E   | 4  | 490.2256  | 245.6164  |
| 2424.2082 | 1212.6077 | 22 | G   | 3  | 361.1830  | 181.0951  |
| 2553.2508 | 1277.1290 | 23 | E   | 2  | 304.1615  | 152.5844  |
|           |           | 24 | R   | 1  | 175.1190  | 88.0631   |

[\[Click\]](#) to move table  
 Static Modifications:  
 C: 57.02146  
 Variable Modifications:  
 K: 14.0157

# Mnp1

K.ISdi**K**IVQDISQLTLLETSSLINELK.T [53, 76] (missed 1)

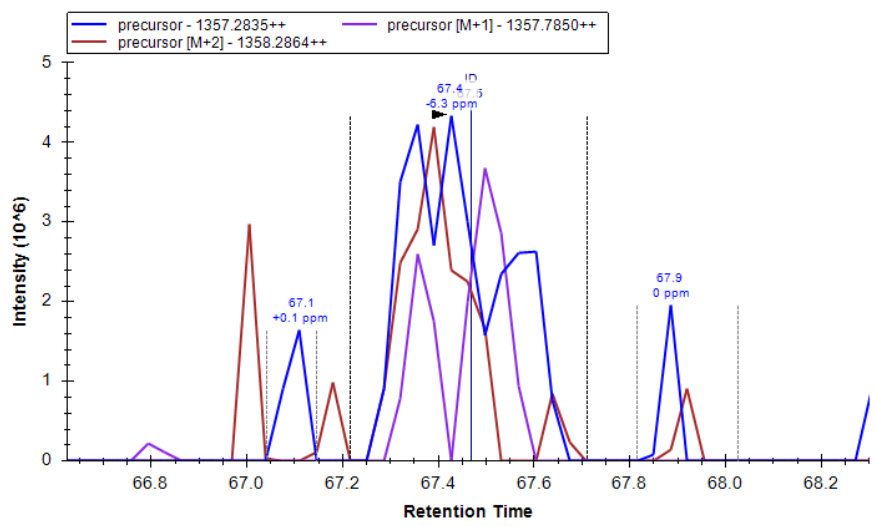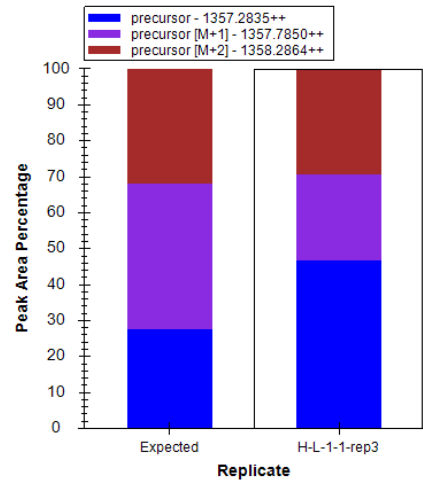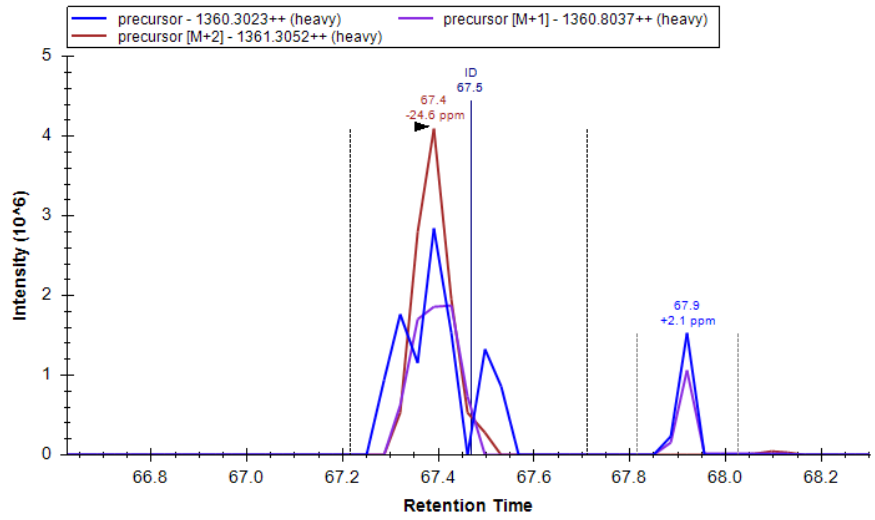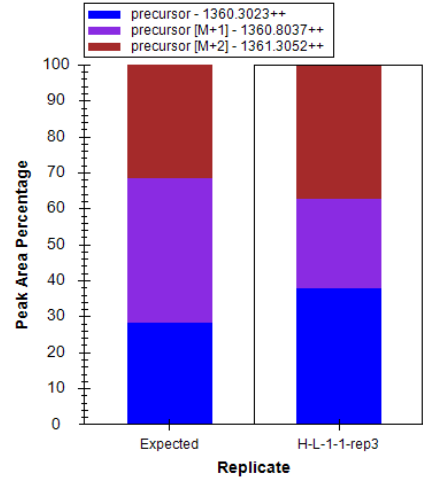

Replicate 3

# Mnp1

K.ISdi**K**IVQDISQLTLLLETSSLINELK.T [53, 76] (missed 1)

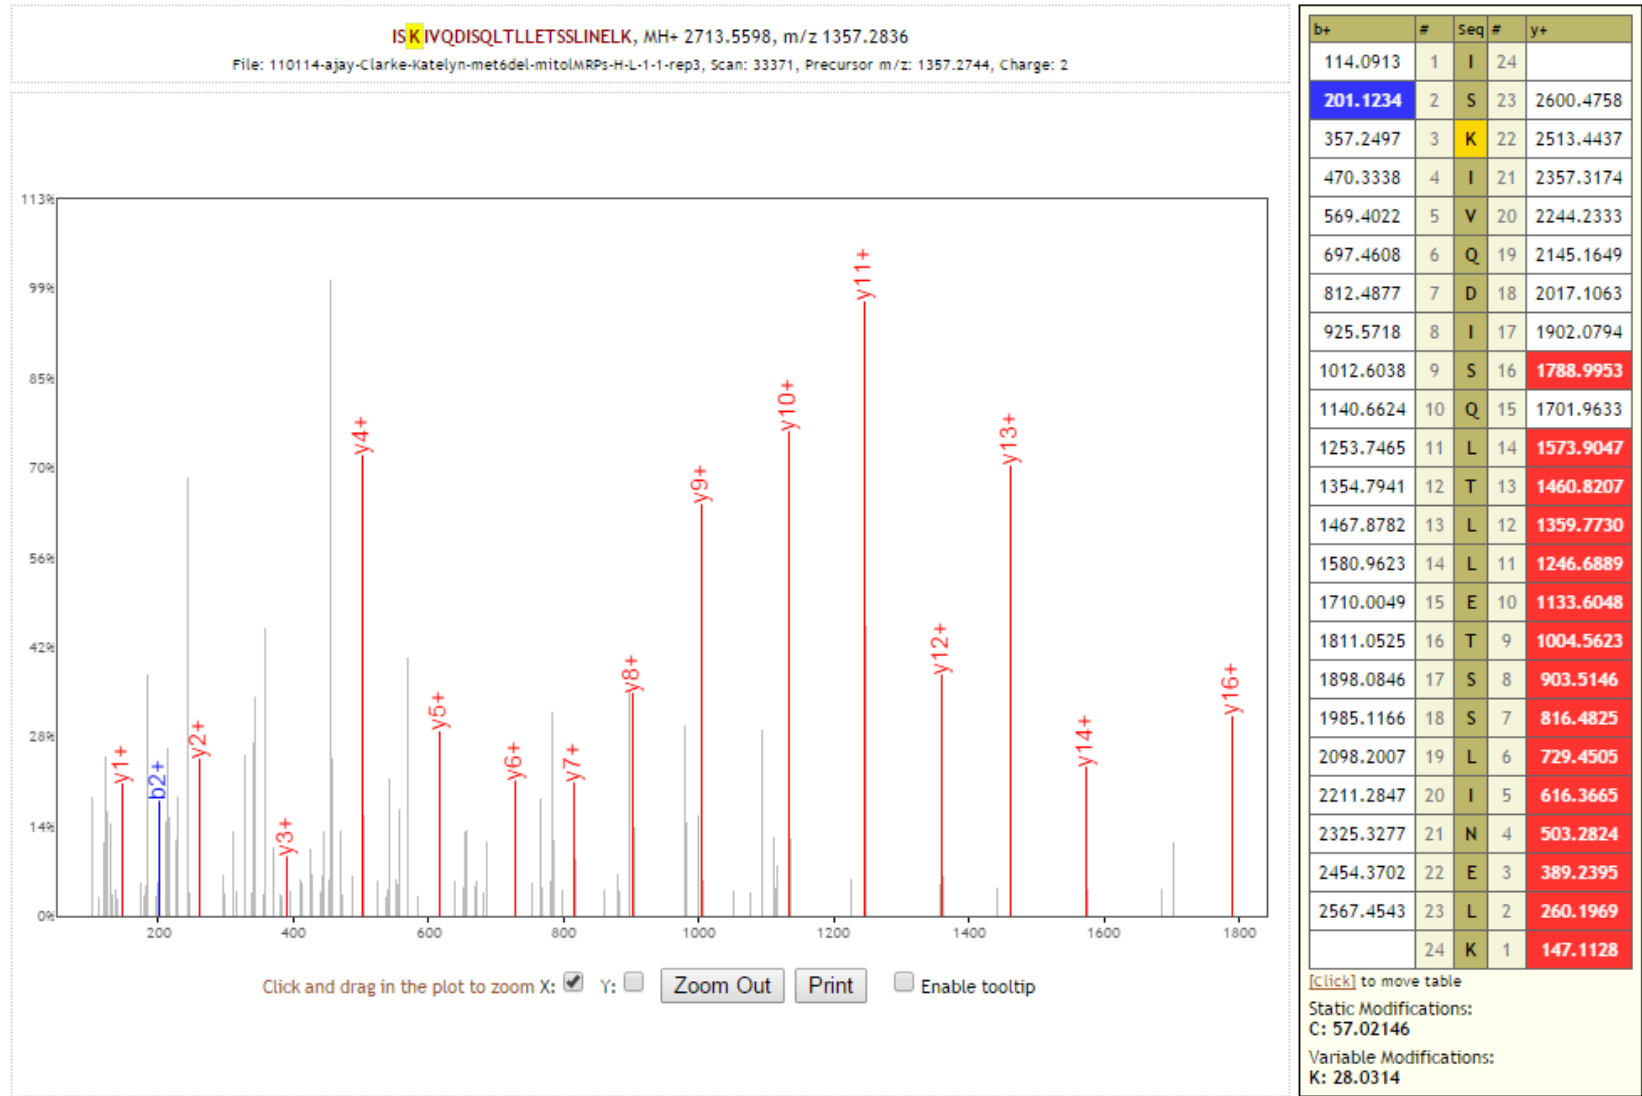

# Rps2

## K.AGmonoKITTIEEFLHSLPVK.E [46, 63] (missed 1)

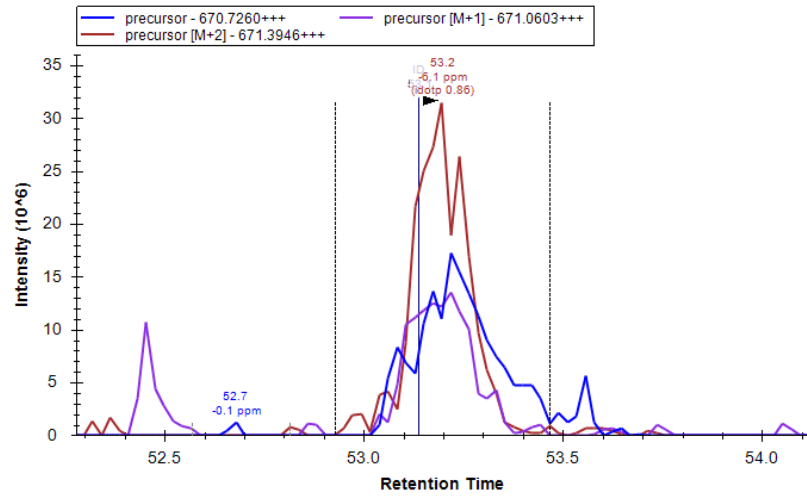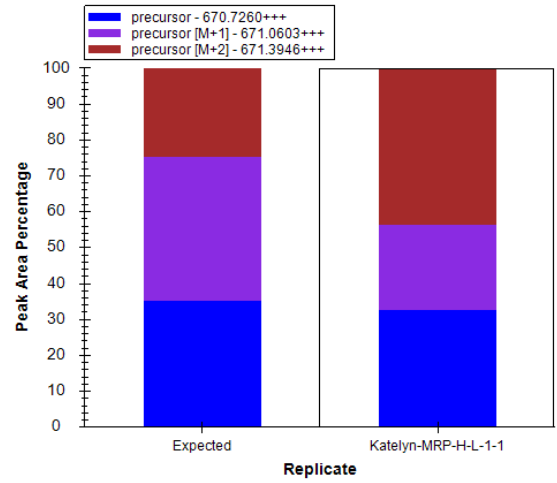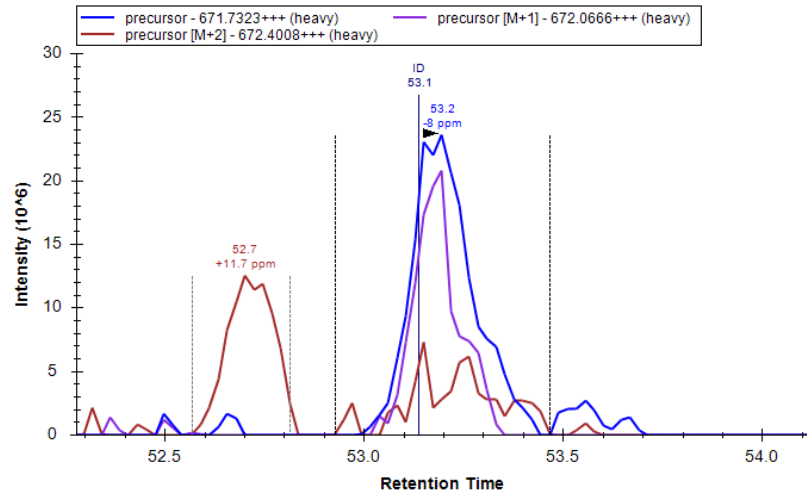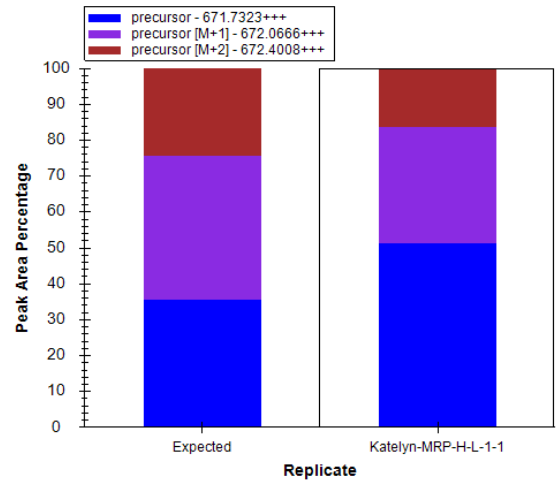

Replicate 2

# Rps2

## K.AGmono**K**ITTIEEIFLHSLPVK.E [46, 63] (missed 1)

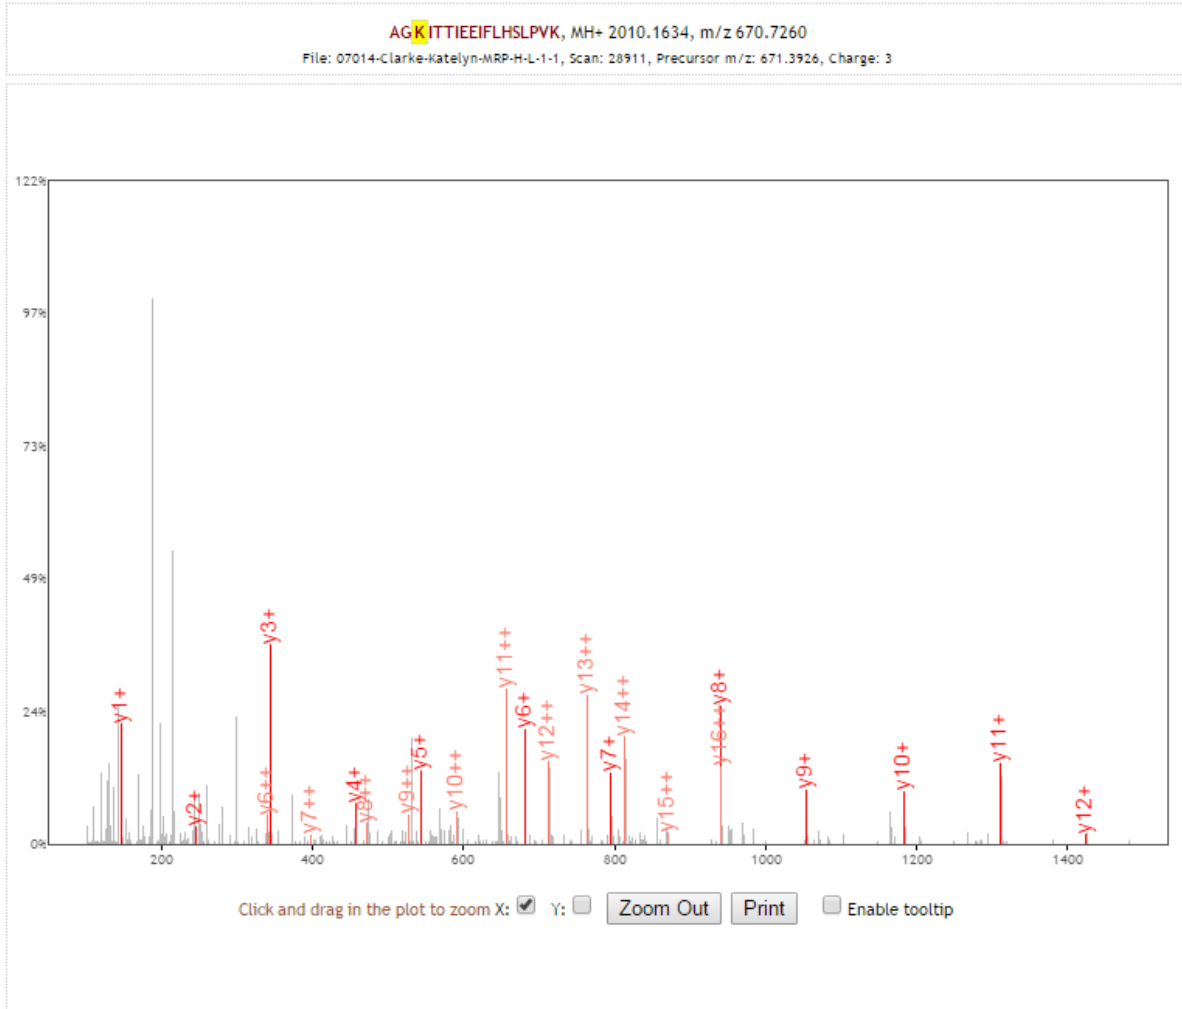

| b+        | b2+      | #  | Seq      | #  | y+        | y2+      |
|-----------|----------|----|----------|----|-----------|----------|
| 72.0444   | 36.5258  | 1  | A        | 18 |           |          |
| 129.0659  | 65.0366  | 2  | G        | 17 | 1939.1263 | 970.0668 |
| 271.1765  | 136.0919 | 3  | <b>K</b> | 16 | 1882.1049 | 941.5561 |
| 384.2606  | 192.6339 | 4  | I        | 15 | 1739.9942 | 870.5007 |
| 485.3083  | 243.1578 | 5  | T        | 14 | 1626.9101 | 813.9587 |
| 586.3559  | 293.6816 | 6  | T        | 13 | 1525.8625 | 763.4349 |
| 699.4400  | 350.2236 | 7  | I        | 12 | 1424.8148 | 712.9110 |
| 828.4826  | 414.7449 | 8  | E        | 11 | 1311.7307 | 656.3690 |
| 957.5252  | 479.2662 | 9  | E        | 10 | 1182.6881 | 591.8477 |
| 1070.6093 | 535.8083 | 10 | I        | 9  | 1053.6455 | 527.3264 |
| 1217.6777 | 609.3425 | 11 | F        | 8  | 940.5615  | 470.7844 |
| 1330.7617 | 665.8845 | 12 | L        | 7  | 793.4930  | 397.2502 |
| 1467.8206 | 734.4140 | 13 | H        | 6  | 680.4090  | 340.7081 |
| 1554.8527 | 777.9300 | 14 | S        | 5  | 543.3501  | 272.1787 |
| 1667.9367 | 834.4720 | 15 | L        | 4  | 456.3180  | 228.6627 |
| 1764.9895 | 882.9984 | 16 | P        | 3  | 343.2340  | 172.1206 |
| 1864.0579 | 932.5326 | 17 | V        | 2  | 246.1812  | 123.5942 |
|           |          | 18 | <b>K</b> | 1  | 147.1128  | 74.0600  |

[\[Click\]](#) to move table  
 Static Modifications:  
 C: 57.02146  
 Variable Modifications:  
 K: 14.0157



# Ssa2

K.mono**K**SEVFSTYADNQPGLIQVFEGER.A [420, 443] (missed 1)

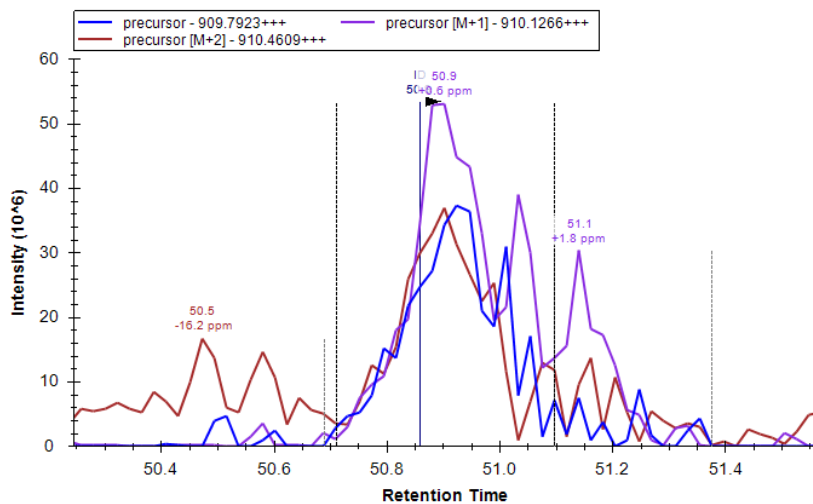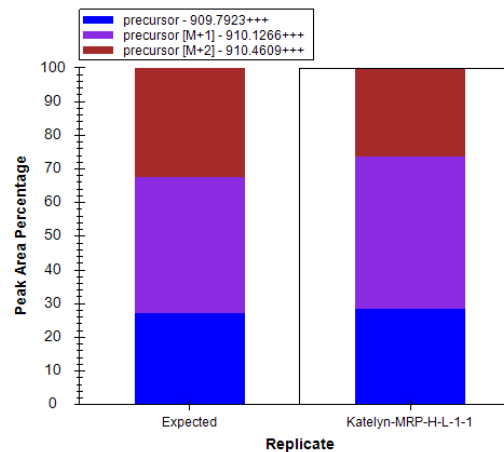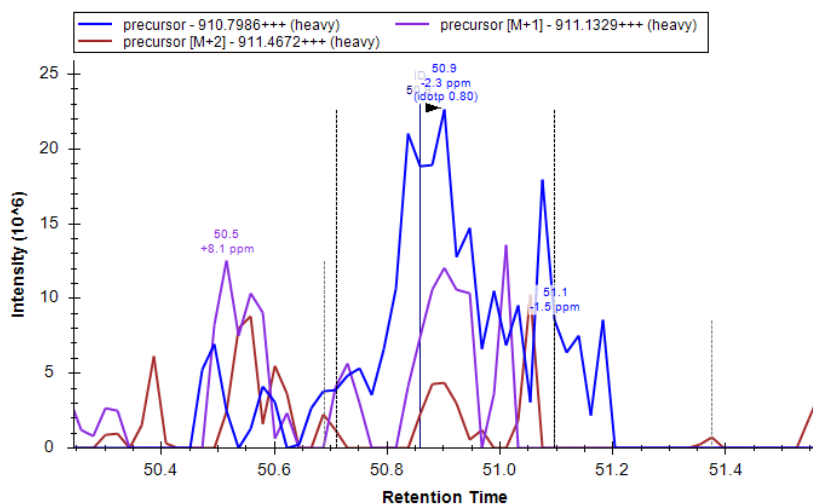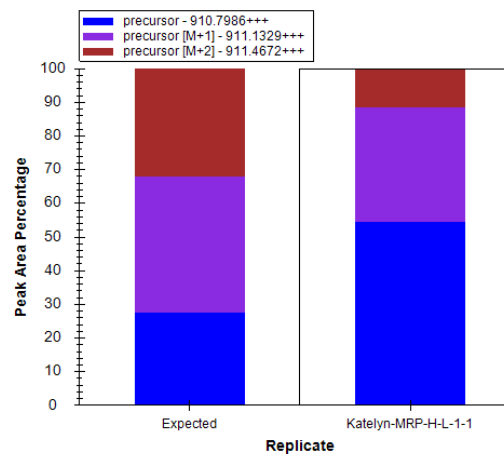

Replicate 2

# Ssa2

K.mono**K**SEVFSTYADNQPGLVLIQVFEGE.R.A [420, 443] (missed 1)

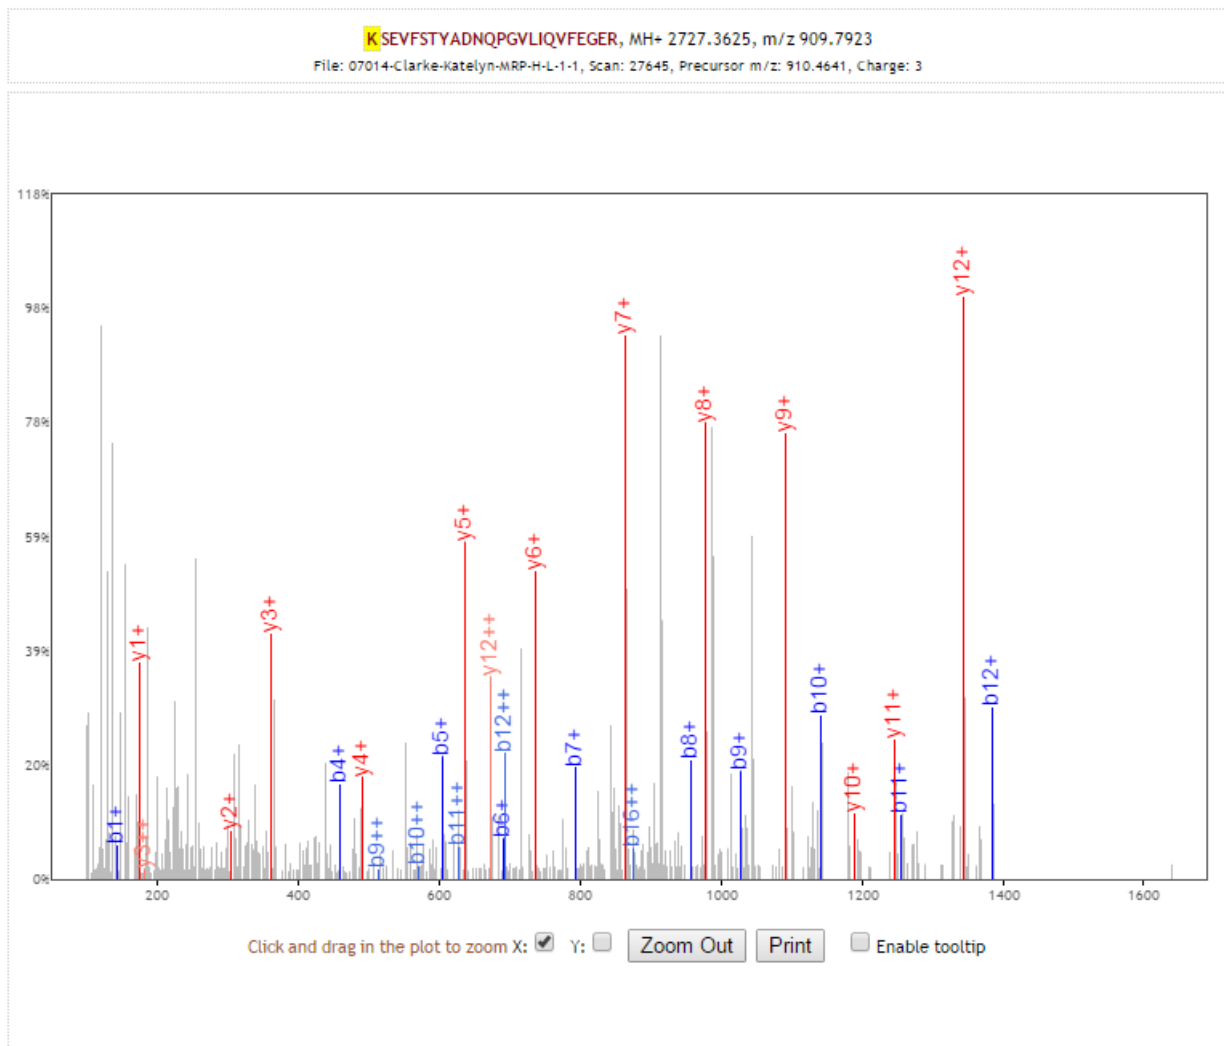

| b+        | b2+       | #  | Seq | #  | y+        | y2+       |
|-----------|-----------|----|-----|----|-----------|-----------|
| 143.1179  | 72.0626   | 1  | K   | 24 |           |           |
| 230.1500  | 115.5786  | 2  | S   | 23 | 2585.2518 | 1293.1295 |
| 359.1926  | 180.0999  | 3  | E   | 22 | 2498.2198 | 1249.6135 |
| 458.2610  | 229.6341  | 4  | V   | 21 | 2369.1772 | 1185.0922 |
| 605.3294  | 303.1683  | 5  | F   | 20 | 2270.1088 | 1135.5580 |
| 692.3614  | 346.6843  | 6  | S   | 19 | 2123.0404 | 1062.0238 |
| 793.4091  | 397.2082  | 7  | T   | 18 | 2036.0083 | 1018.5078 |
| 956.4724  | 478.7399  | 8  | Y   | 17 | 1934.9607 | 967.9840  |
| 1027.5095 | 514.2584  | 9  | A   | 16 | 1771.8973 | 886.4523  |
| 1142.5365 | 571.7719  | 10 | D   | 15 | 1700.8602 | 850.9338  |
| 1256.5794 | 628.7933  | 11 | N   | 14 | 1585.8333 | 793.4203  |
| 1384.6380 | 692.8226  | 12 | Q   | 13 | 1471.7904 | 736.3988  |
| 1481.6907 | 741.3490  | 13 | P   | 12 | 1343.7318 | 672.3695  |
| 1538.7122 | 769.8597  | 14 | G   | 11 | 1246.6790 | 623.8431  |
| 1637.7806 | 819.3940  | 15 | V   | 10 | 1189.6575 | 595.3324  |
| 1750.8647 | 875.9360  | 16 | L   | 9  | 1090.5891 | 545.7982  |
| 1863.9488 | 932.4780  | 17 | I   | 8  | 977.5051  | 489.2562  |
| 1992.0073 | 996.5073  | 18 | Q   | 7  | 864.4210  | 432.7141  |
| 2091.0757 | 1046.0415 | 19 | V   | 6  | 736.3624  | 368.6849  |
| 2238.1442 | 1119.5757 | 20 | F   | 5  | 637.2940  | 319.1506  |
| 2367.1868 | 1184.0970 | 21 | E   | 4  | 490.2256  | 245.6164  |
| 2424.2082 | 1212.6077 | 22 | G   | 3  | 361.1830  | 181.0951  |
| 2553.2508 | 1277.1290 | 23 | E   | 2  | 304.1615  | 152.5844  |
|           |           | 24 | R   | 1  | 175.1190  | 88.0631   |

[\[Click\]](#) to move table  
 Static Modifications:  
 C: 57.02146  
 Variable Modifications:  
 K: 14.0157

# Mrpl4

K.KFLDTLANDYFLNKDIPDDEVASMLTmonoR.F [177, 203]  
(missed 2)

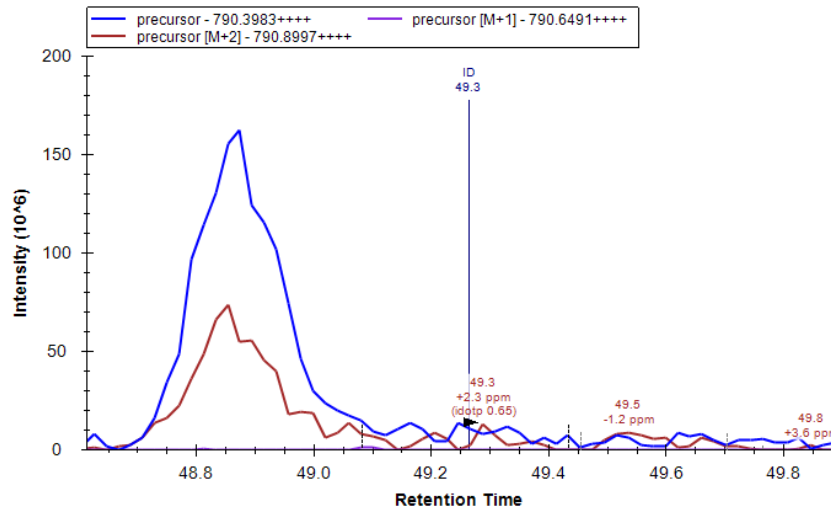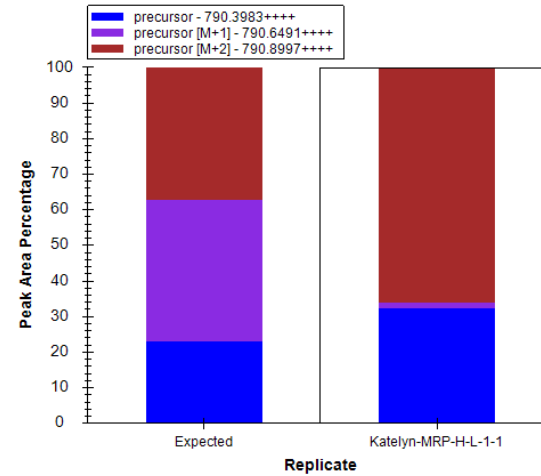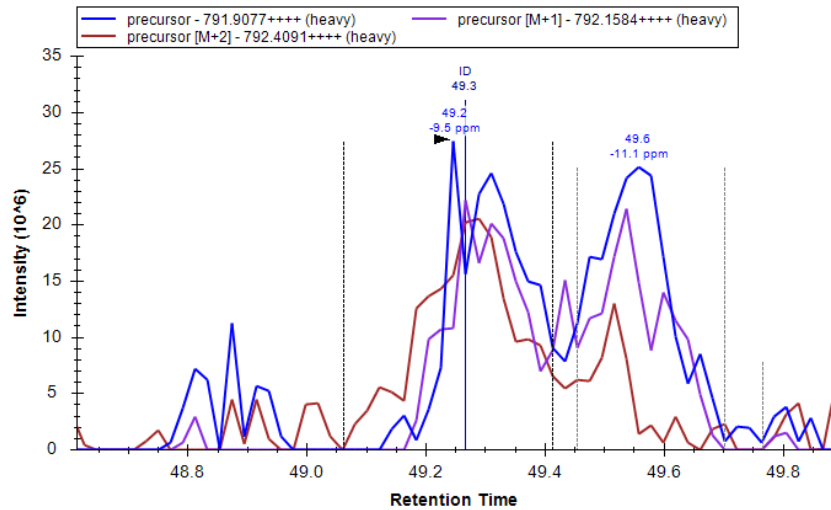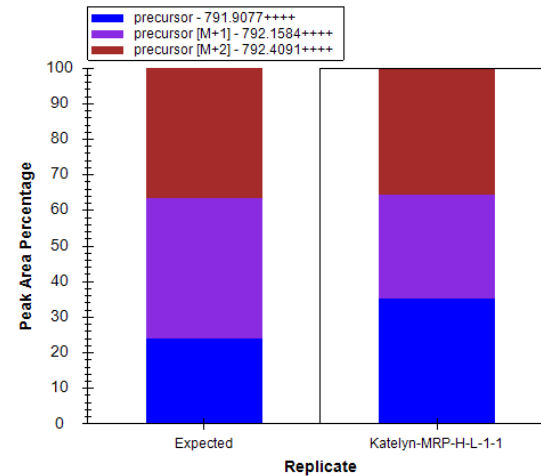

Replicate 2

# Mrpl4

## K.KFLDTLANDYFLNKDIPDDEVASMLTmonoR.F [177, 203] (missed 2)

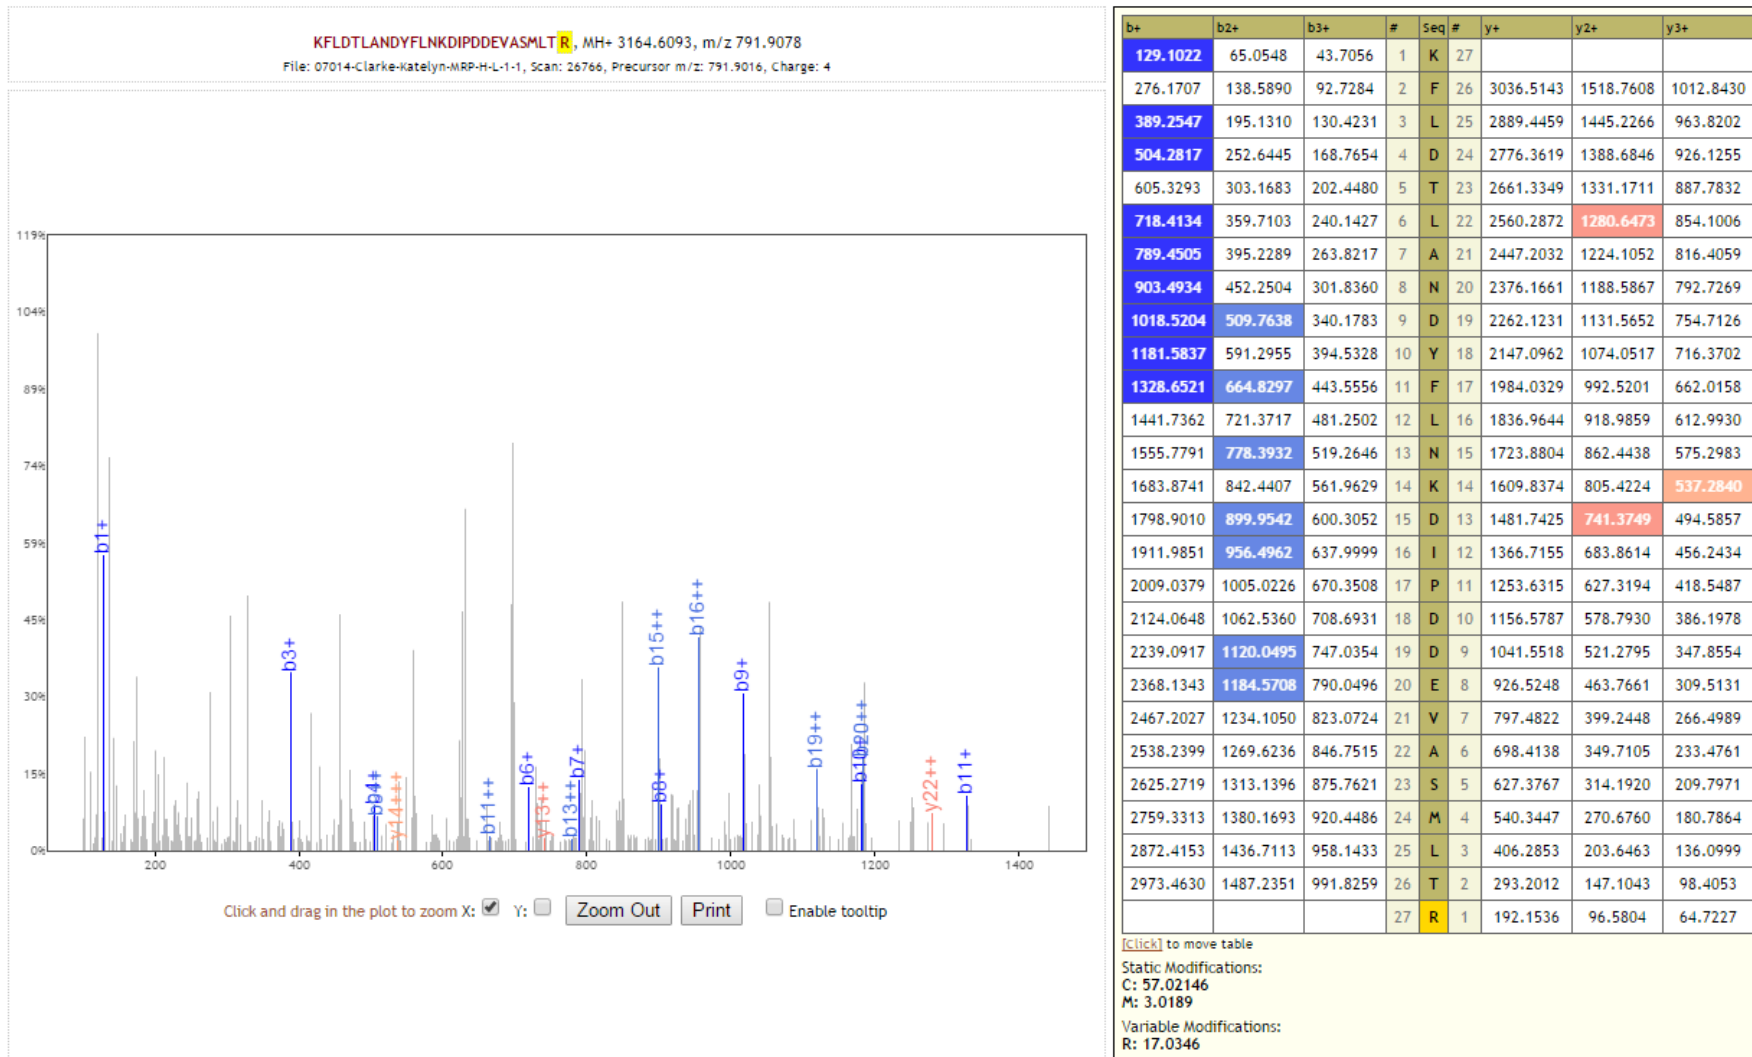

# Lat1

## K.QSSQTSGAAAATPAAATSSTTAGSAPSPSSTASYEDVPISTMmono

### R.S [217, 259]

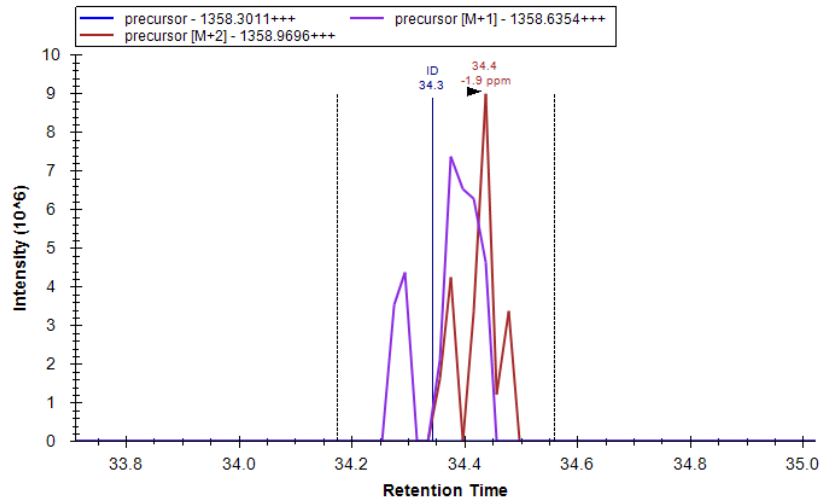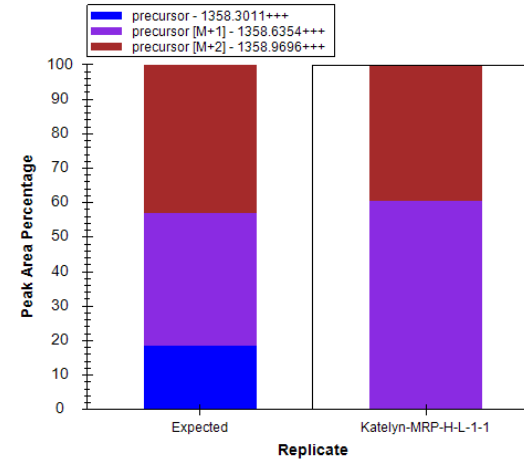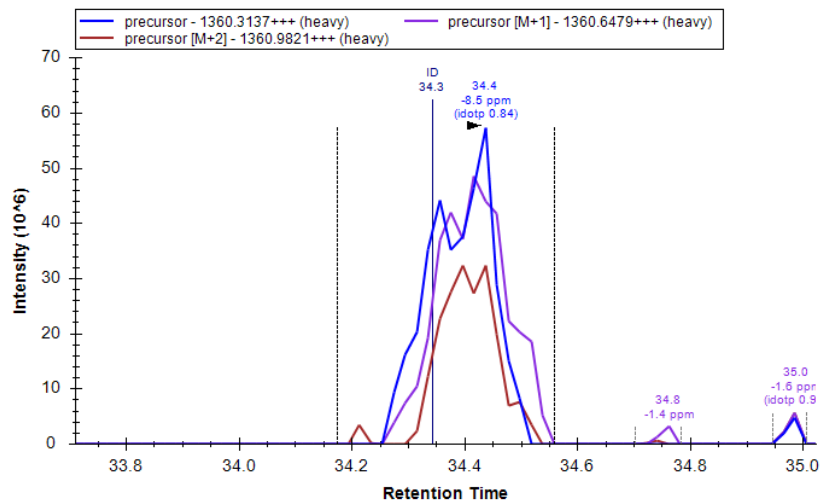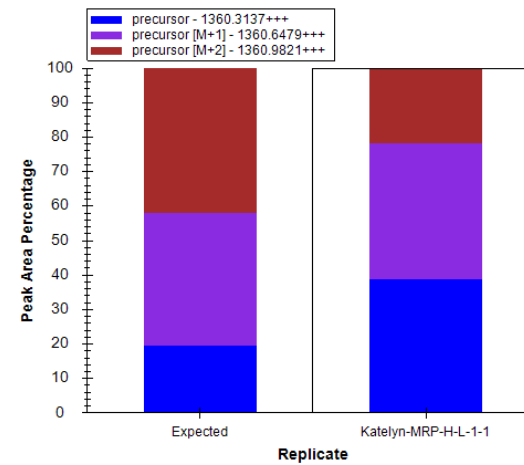

Replicate 2

# Lat1

## K.QSSQTSGAAAATPAAATSSTTAGSAPSPSSTASYEDVPISTMmono

### R.S [217, 259]

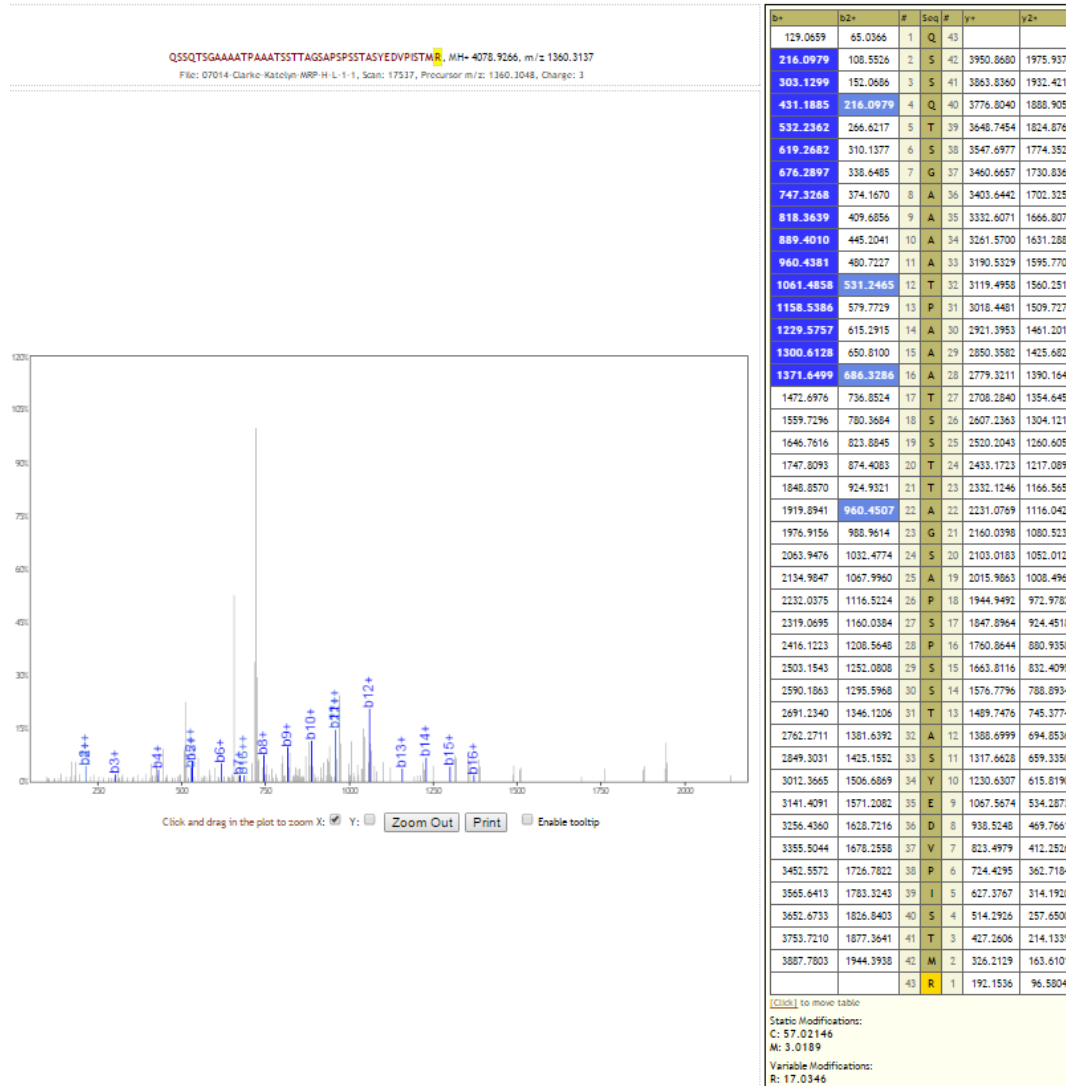

Replicate 2

# Lat1

K.Fdi**K**NVDVSVAVATPTGLLTPIVK.N [338, 359] (missed 1)

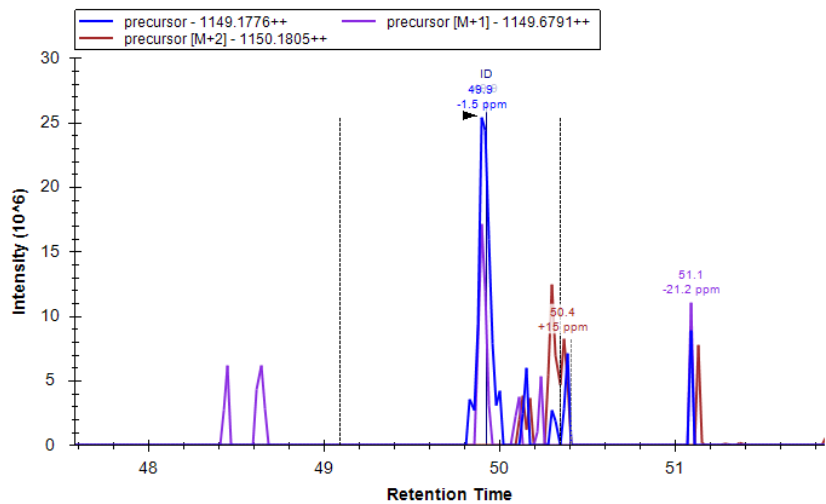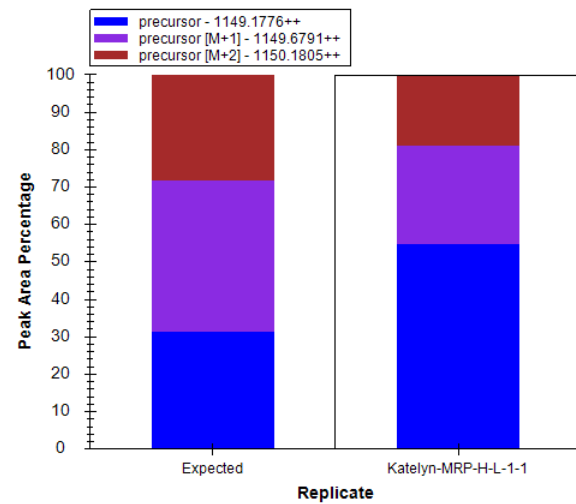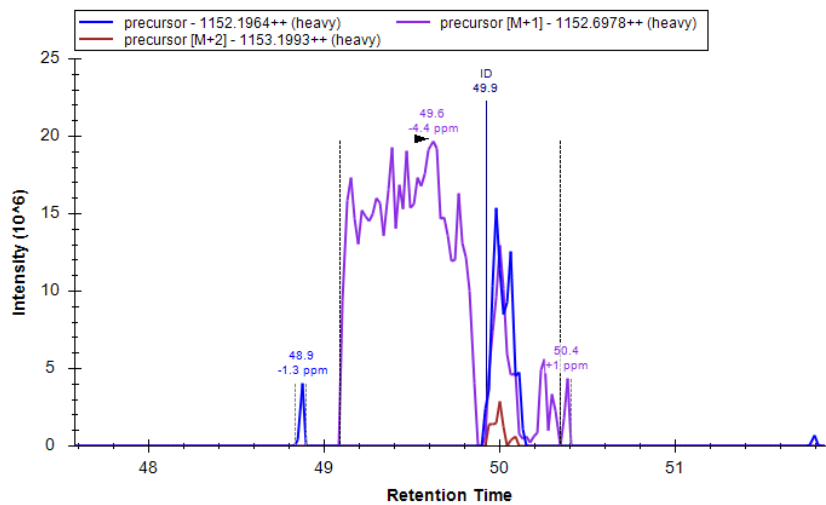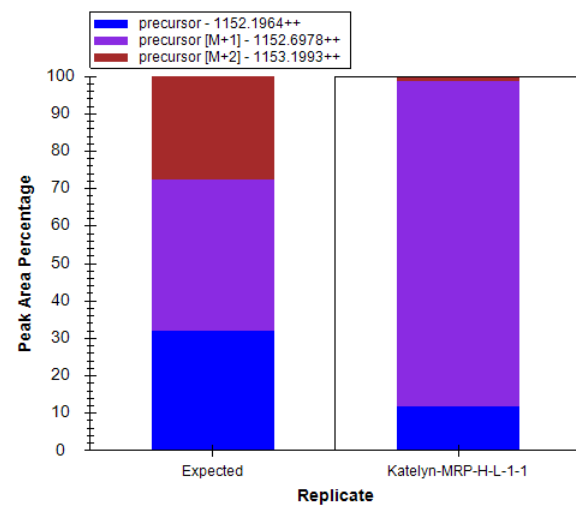

Replicate 2

# Lat1

## K.Fdi**K**NVDVSVAVATPTGLLTPIVK.N [338, 359] (missed 1)

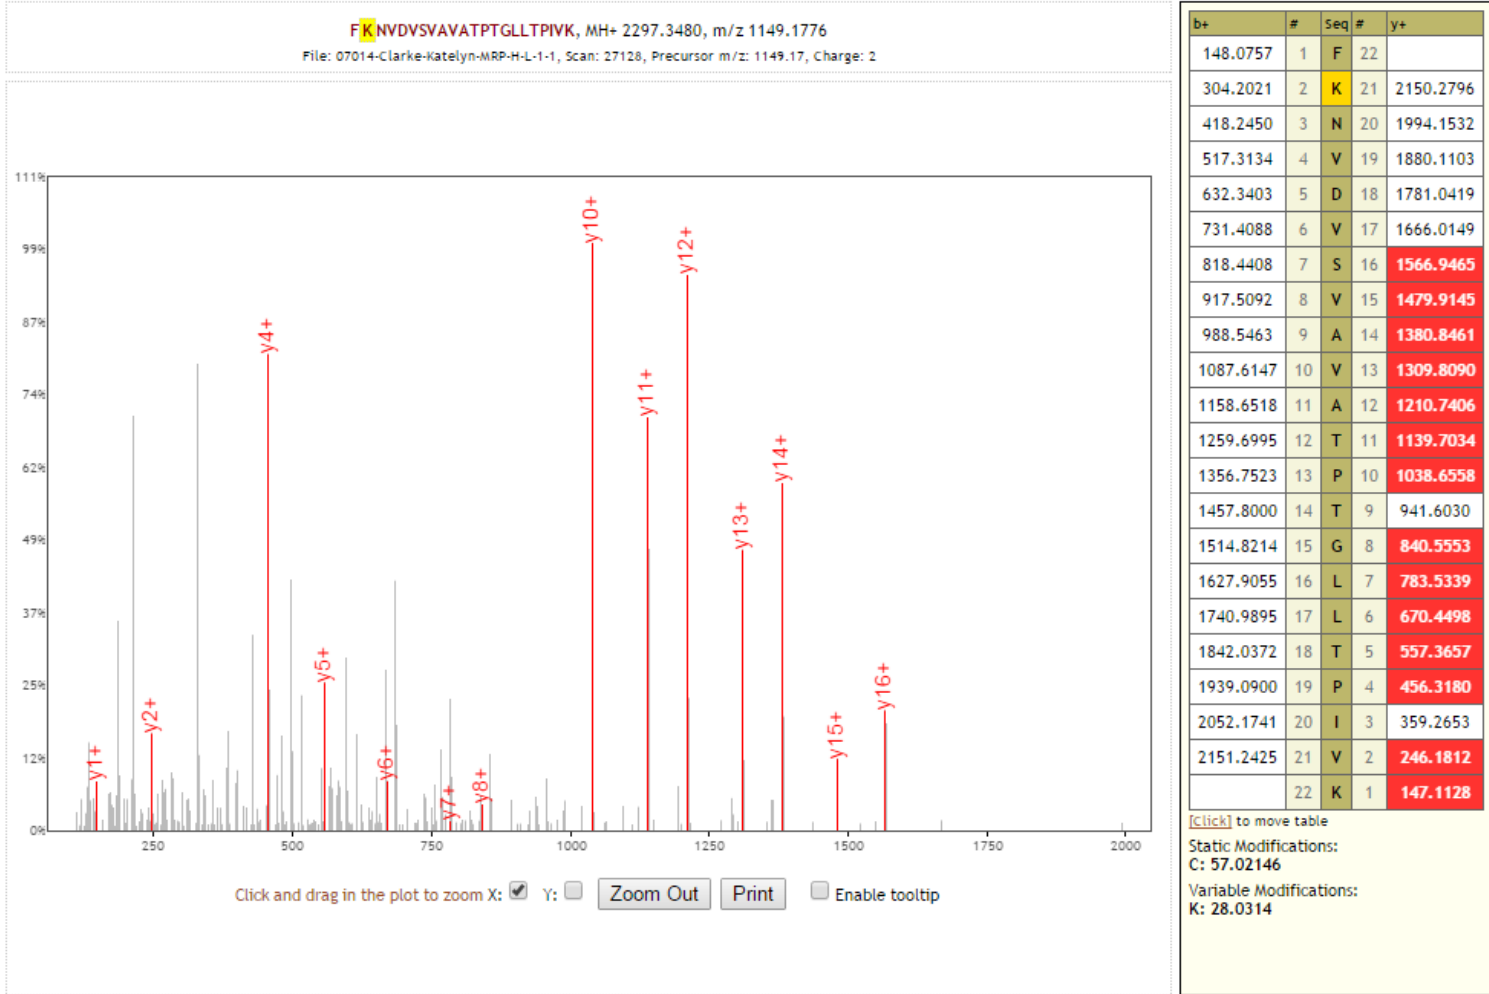



# Mrpl40

K.GQPDLIIPWPmono**K**PDPIDVQTNLATDPVIAR.E [175, 203]

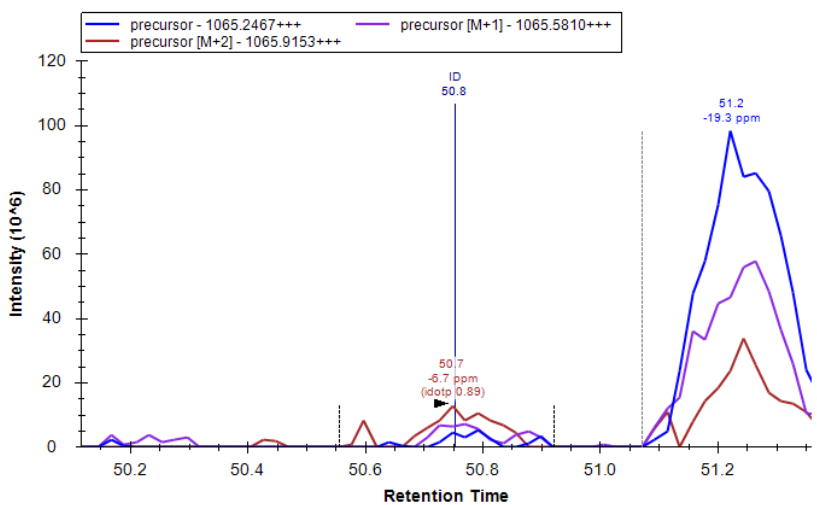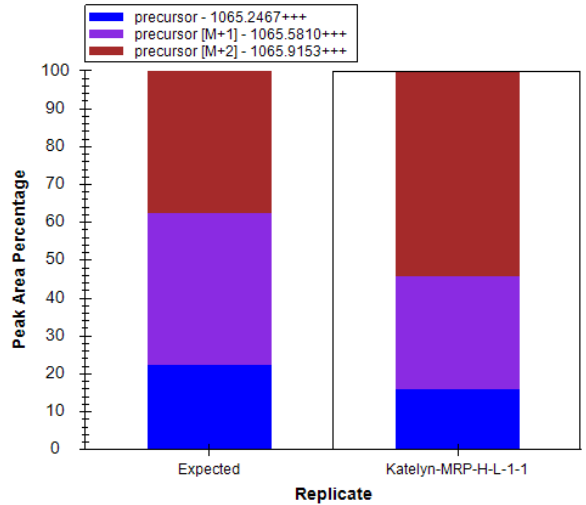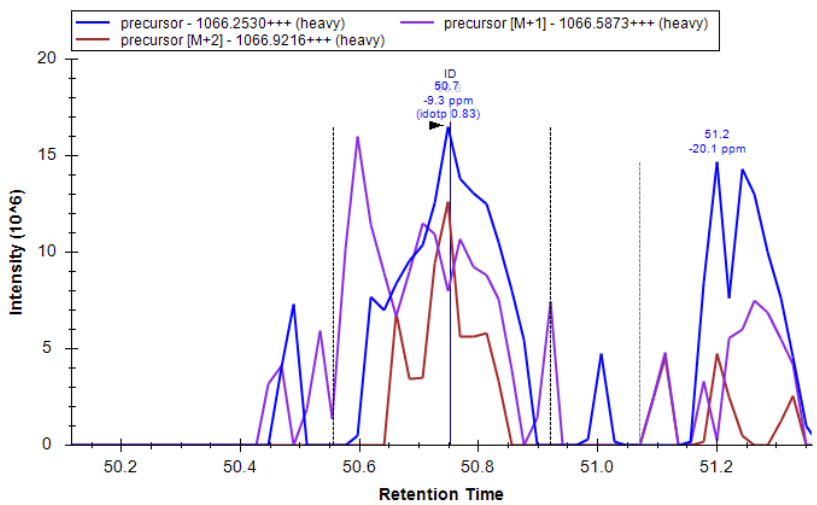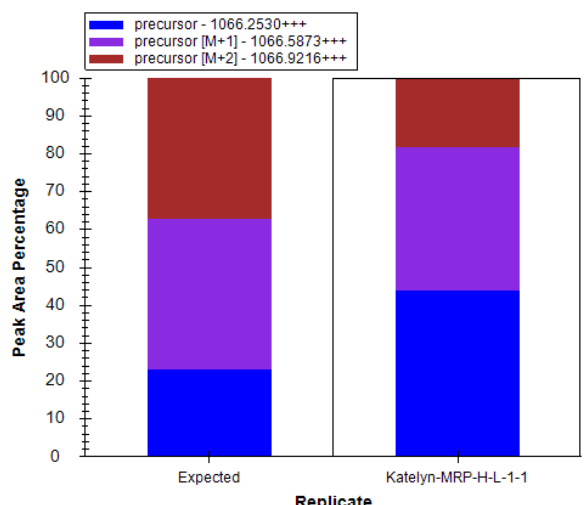

Replicate 2

# Mrpl40

## K.GQPDLIIPWPmono**K**PDPIDVQTNLATDPVIAR.E [175, 203]

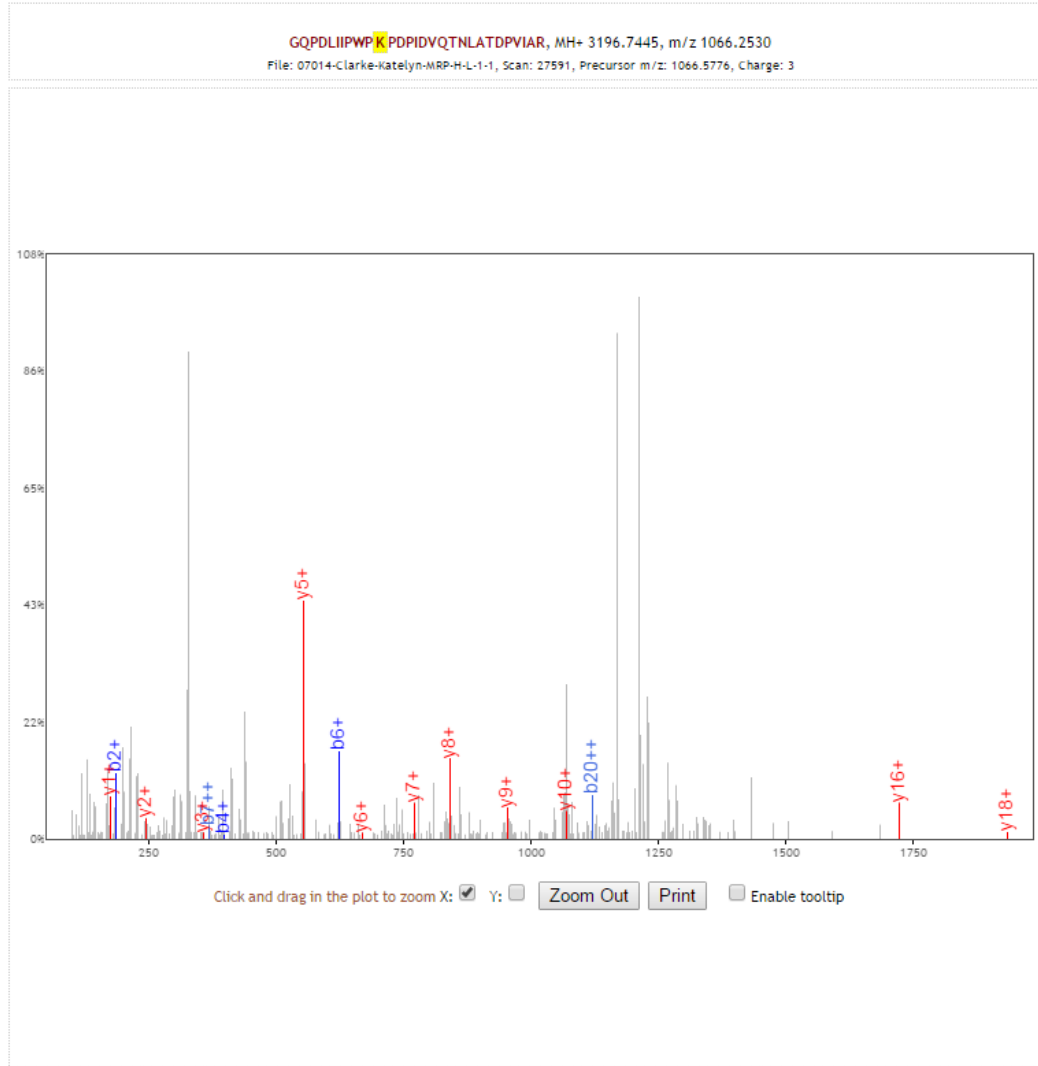

| b+              | b2+              | #  | Seq #       | y+               | y2+       |
|-----------------|------------------|----|-------------|------------------|-----------|
| 58.0287         | 29.5180          | 1  | G 29        |                  |           |
| <b>186.0873</b> | 93.5473          | 2  | Q 28        | 3139.7231        | 1570.3652 |
| 283.1401        | 142.0737         | 3  | P 27        | 3011.6645        | 1506.3359 |
| <b>398.1670</b> | 199.5872         | 4  | D 26        | 2914.6117        | 1457.8095 |
| 511.2511        | 256.1292         | 5  | L 25        | 2799.5848        | 1400.2960 |
| <b>624.3352</b> | 312.6712         | 6  | I 24        | 2686.5007        | 1343.7540 |
| 737.4192        | <b>369.2132</b>  | 7  | I 23        | 2573.4166        | 1287.2120 |
| 834.4720        | 417.7396         | 8  | P 22        | 2460.3326        | 1230.6699 |
| 1020.5513       | 510.7793         | 9  | <b>W</b> 21 | 2363.2798        | 1182.1435 |
| 1117.6041       | 559.3057         | 10 | P 20        | 2177.2005        | 1089.1039 |
| 1262.7336       | 631.8704         | 11 | <b>K</b> 19 | 2080.1477        | 1040.5775 |
| 1359.7864       | 680.3968         | 12 | P 18        | <b>1935.0182</b> | 968.0127  |
| 1474.8133       | 737.9103         | 13 | D 17        | 1837.9654        | 919.4863  |
| 1571.8661       | 786.4367         | 14 | P 16        | <b>1722.9385</b> | 861.9729  |
| 1684.9502       | 842.9787         | 15 | I 15        | 1625.8857        | 813.4465  |
| 1799.9771       | 900.4922         | 16 | D 14        | 1512.8016        | 756.9045  |
| 1899.0455       | 950.0264         | 17 | V 13        | 1397.7747        | 699.3910  |
| 2027.1041       | 1014.0557        | 18 | Q 12        | 1298.7063        | 649.8568  |
| 2128.1518       | 1064.5795        | 19 | T 11        | 1170.6477        | 585.8275  |
| 2242.1947       | <b>1121.6010</b> | 20 | N 10        | <b>1069.6000</b> | 535.3037  |
| 2355.2788       | 1178.1430        | 21 | L 9         | <b>955.5571</b>  | 478.2822  |
| 2426.3159       | 1213.6616        | 22 | A 8         | <b>842.4730</b>  | 421.7402  |
| 2527.3636       | 1264.1854        | 23 | T 7         | <b>771.4359</b>  | 386.2216  |
| 2642.3905       | 1321.6989        | 24 | D 6         | <b>670.3883</b>  | 335.6978  |
| 2739.4433       | 1370.2253        | 25 | P 5         | <b>555.3613</b>  | 278.1843  |
| 2838.5117       | 1419.7595        | 26 | V 4         | 458.3085         | 229.6579  |
| 2951.5957       | 1476.3015        | 27 | I 3         | <b>359.2401</b>  | 180.1237  |
| 3022.6329       | 1511.8201        | 28 | A 2         | <b>246.1561</b>  | 123.5817  |
|                 |                  | 29 | <b>R</b> 1  | <b>175.1190</b>  | 88.0631   |

[\[Click\]](#) to move table

Static Modifications:  
 C: 57.02146  
 M: 3.0189

Variable Modifications:  
 K: 17.0346
