# Supplementary material
Source: PubMed Central journal article supplement (PMC5148652)
Supplement: NIHMS820798-supplement-Supplementary_Figure_3.pdf [file NIHMS820798-supplement-Supplementary_Figure_3.pdf]

# Mitochondrial Fraction

MS1 Chromatograms and  
MS2 Fragmentation Patterns

# Rpl42ab

K.QSGFGGQTmono**K**PVFHK.K [46, 59]

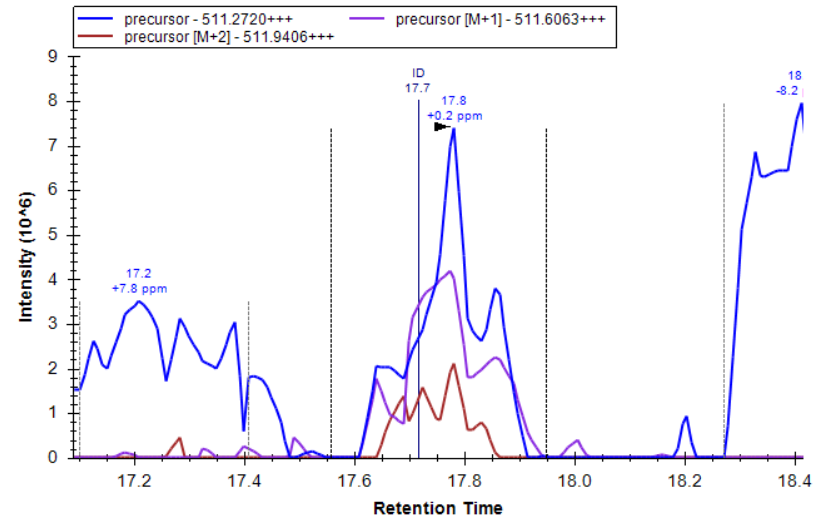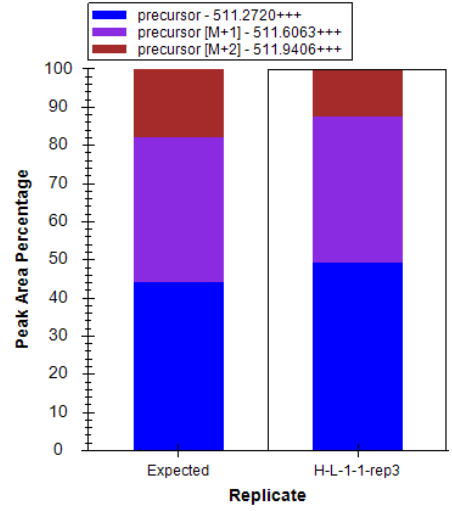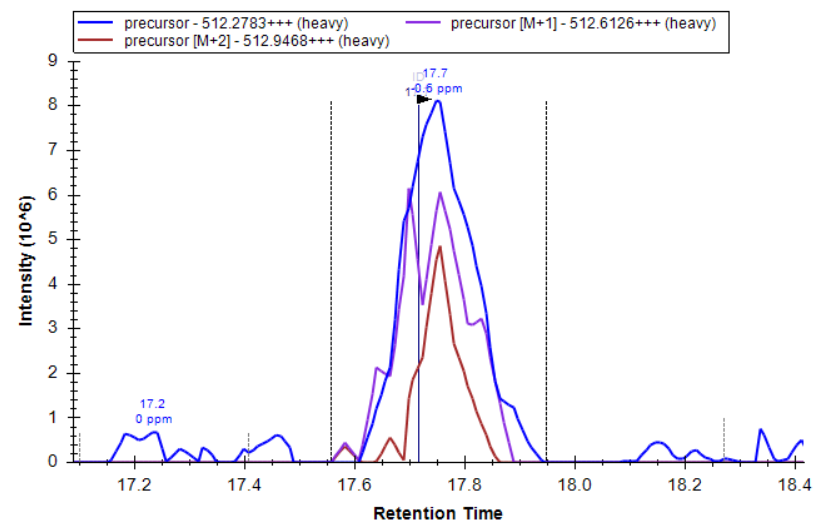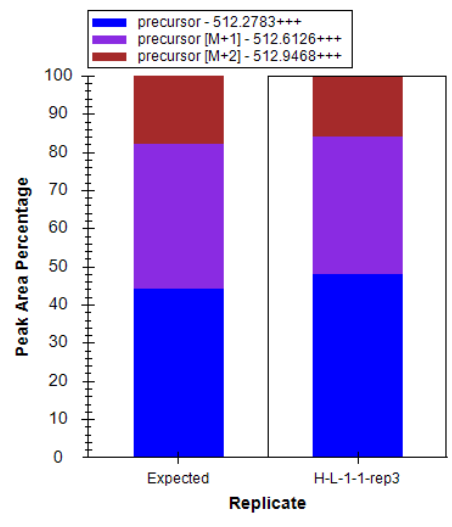

Replicate 3

# Rpl42ab

K.QSGFGGQTmono**K**PVFHK.K [46, 59]

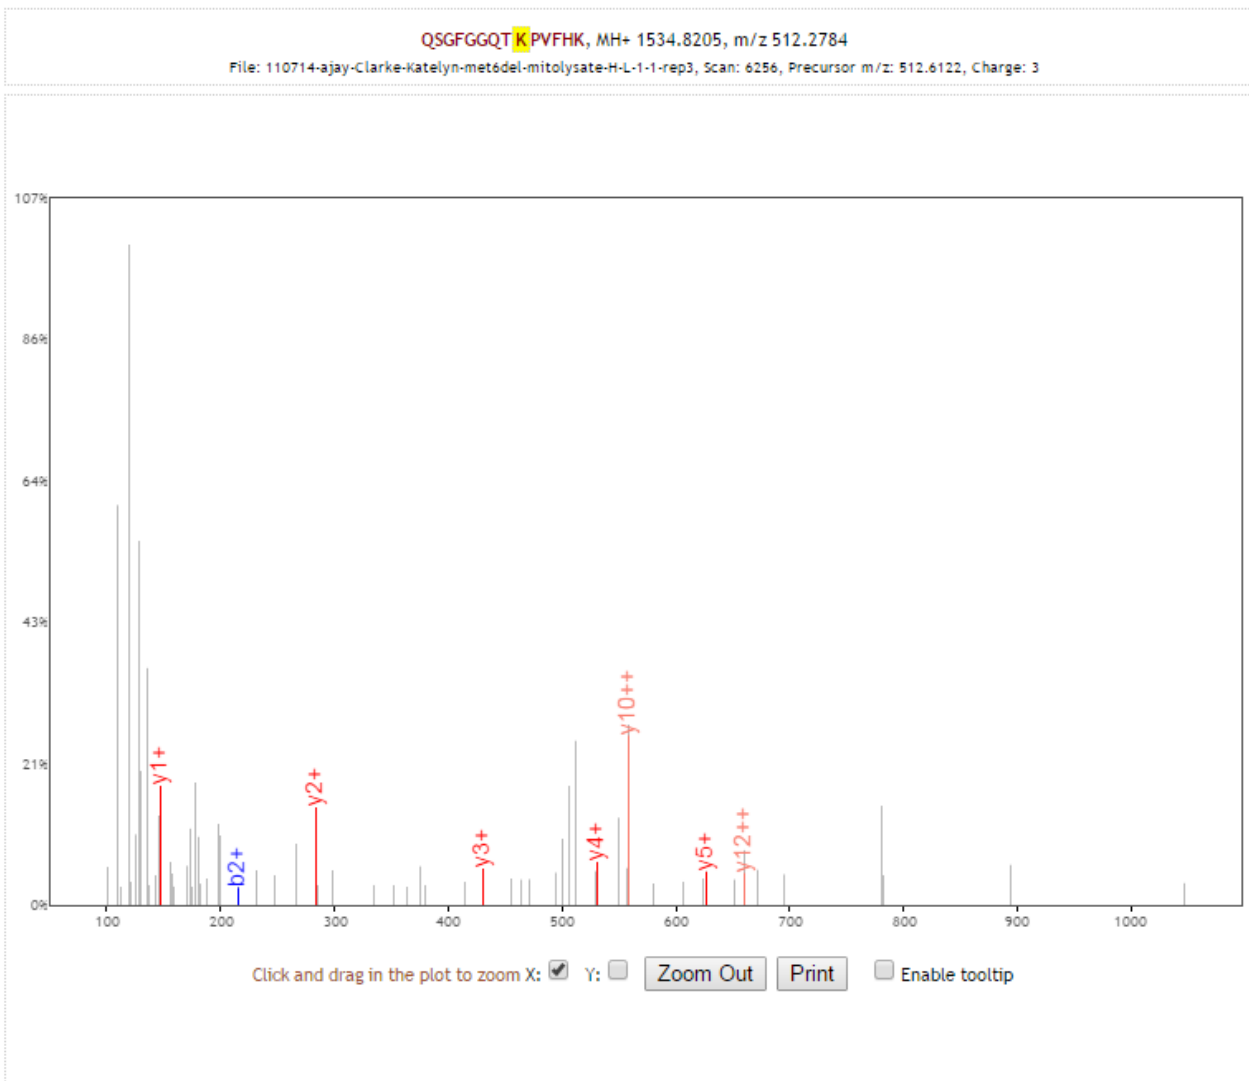

| b+              | b2+      | #  | Seq #    | y+ | y2+             |
|-----------------|----------|----|----------|----|-----------------|
| 129.0659        | 65.0366  | 1  | Q        | 14 |                 |
| <b>216.0979</b> | 108.5526 | 2  | S        | 13 | 703.8846        |
| 273.1193        | 137.0633 | 3  | G        | 12 | <b>660.3686</b> |
| 420.1878        | 210.5975 | 4  | F        | 11 | 631.8579        |
| 477.2092        | 239.1082 | 5  | G        | 10 | <b>558.3237</b> |
| 534.2307        | 267.6190 | 6  | G        | 9  | 529.8129        |
| 662.2893        | 331.6483 | 7  | Q        | 8  | 501.3022        |
| 763.3369        | 382.1721 | 8  | T        | 7  | 437.2729        |
| 908.4665        | 454.7369 | 9  | <b>K</b> | 6  | 386.7491        |
| 1005.5193       | 503.2633 | 10 | P        | 5  | <b>627.3613</b> |
| 1104.5877       | 552.7975 | 11 | V        | 4  | <b>530.3085</b> |
| 1251.6561       | 626.3317 | 12 | F        | 3  | <b>431.2401</b> |
| 1388.7150       | 694.8611 | 13 | H        | 2  | <b>284.1717</b> |
|                 |          | 14 | K        | 1  | <b>147.1128</b> |

[Click] to move table

Static Modifications:  
 C: 57.02146  
 M: 3.0189

Variable Modifications:  
 K: 17.0346

# eEF1A

## K.STTTGHLIYmono**K**CGGIDK.R [20, 35] (missed 1)

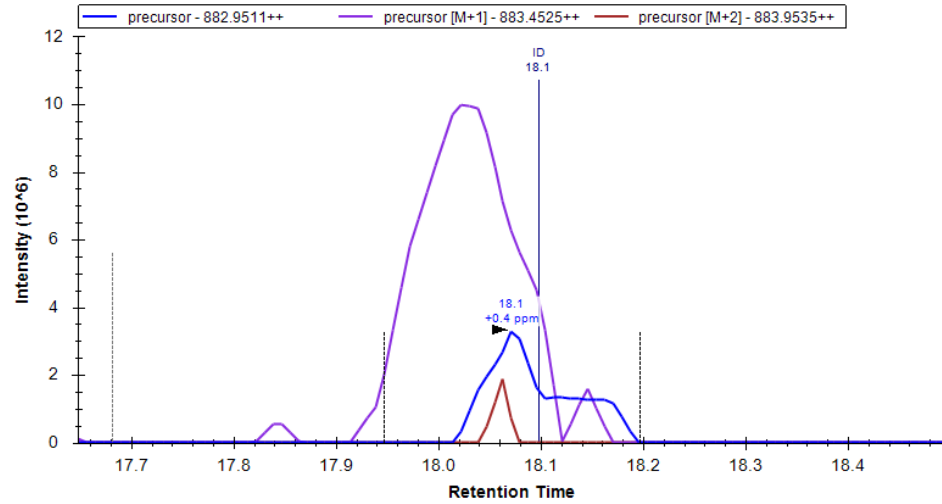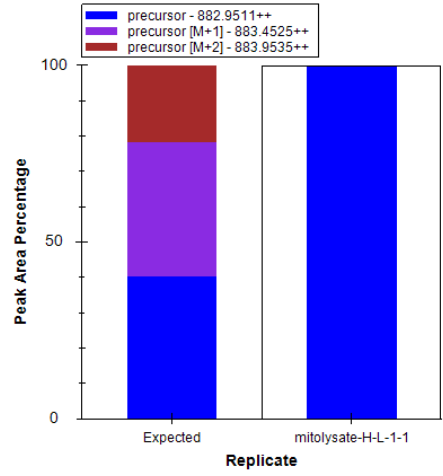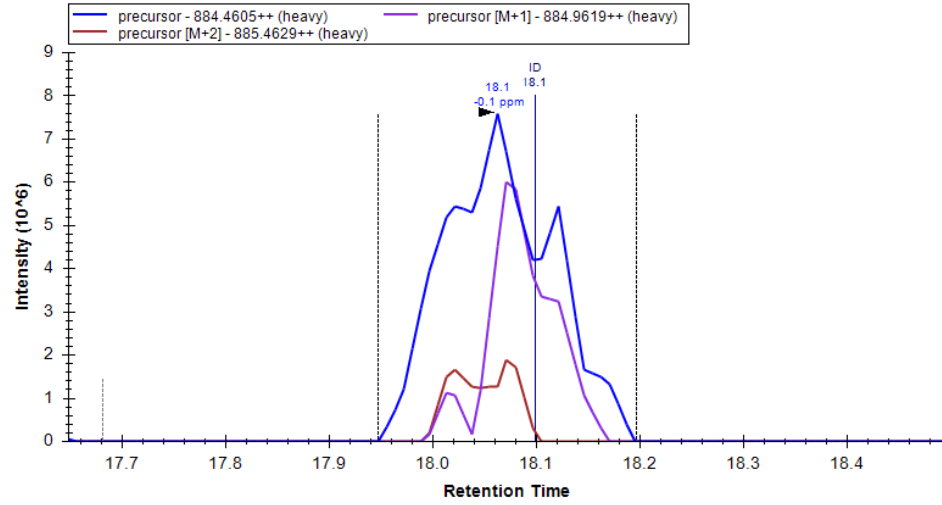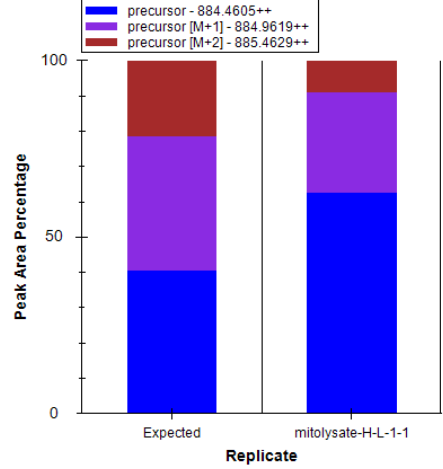

Replicate 1

# eEF1A

## K.STTTGHLIYmono**K**CGGIDK.R [20, 35] (missed 1)

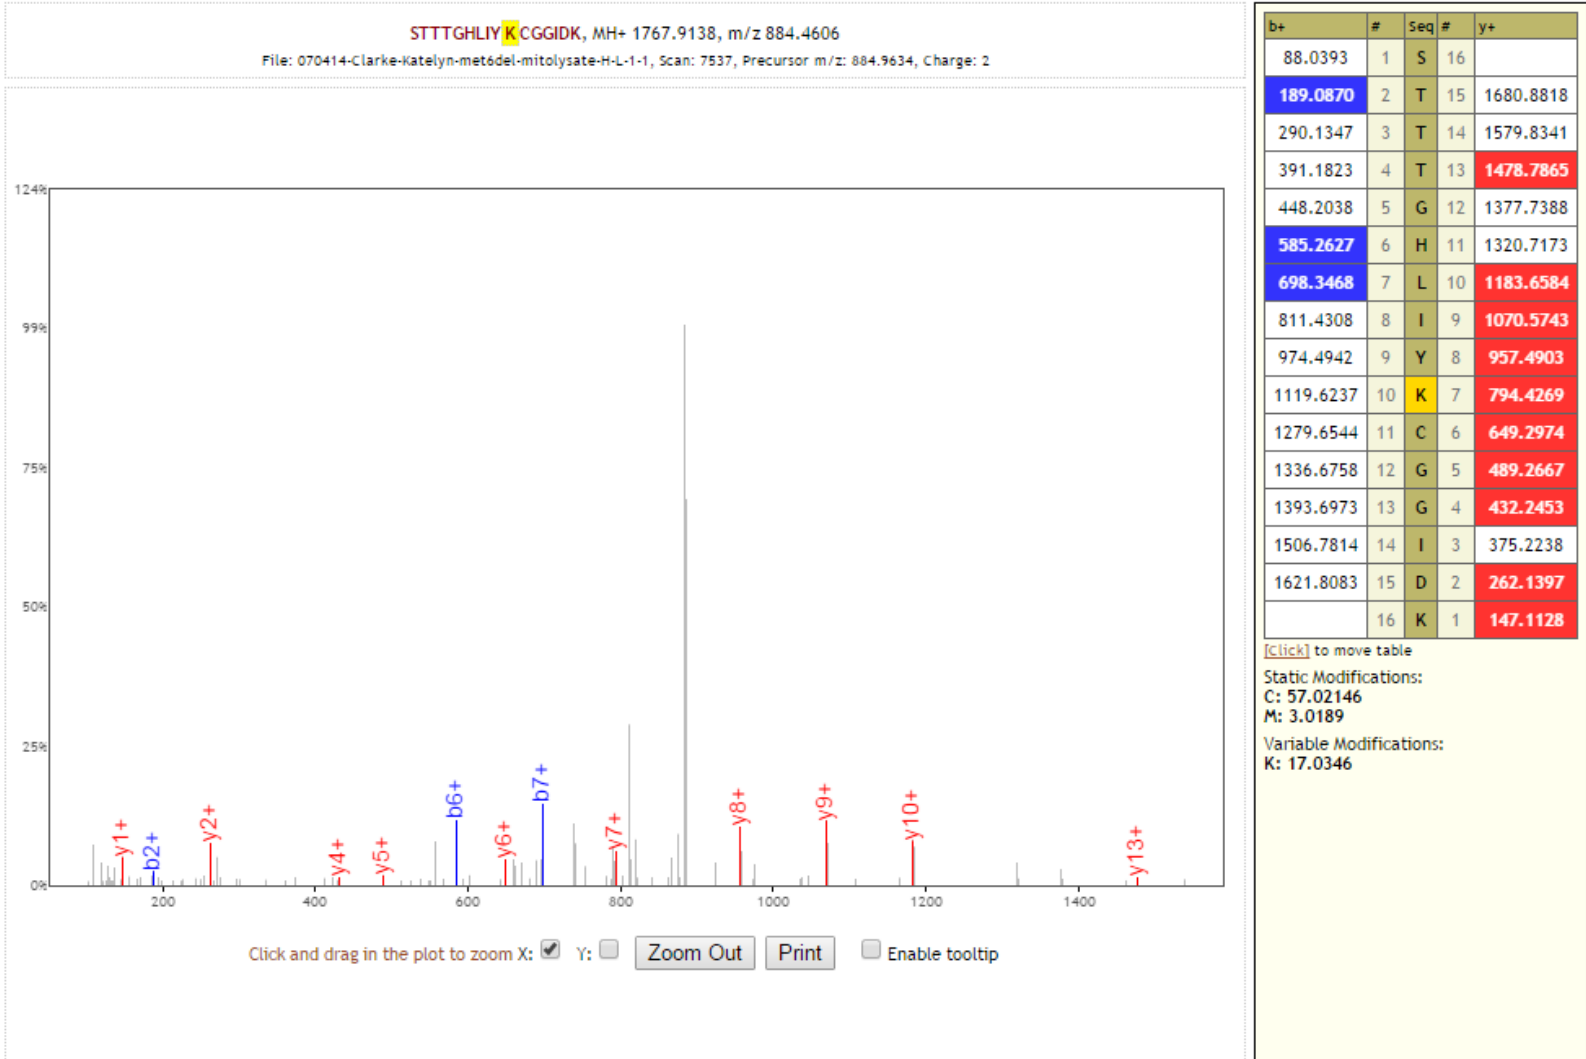

# eEF1A

## R.GITIDIALWtriKFETPK.Y [69, 83] (missed 1)

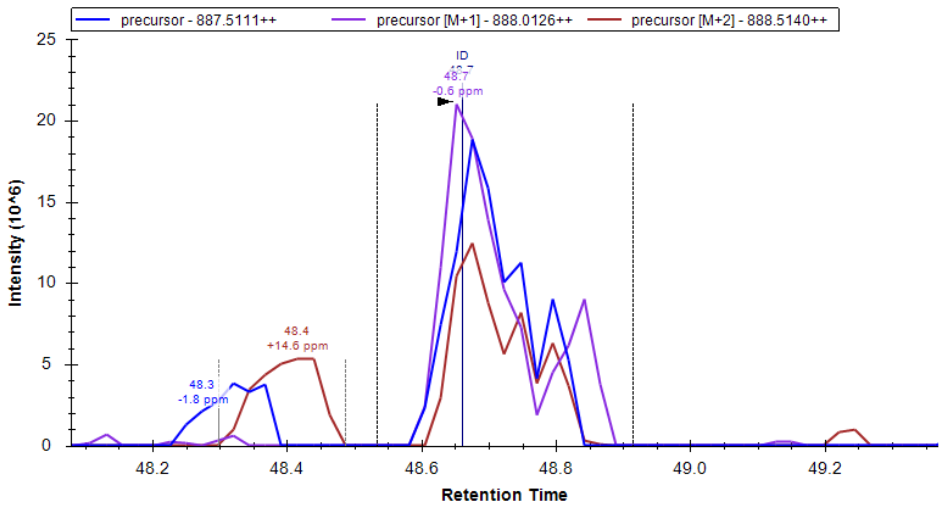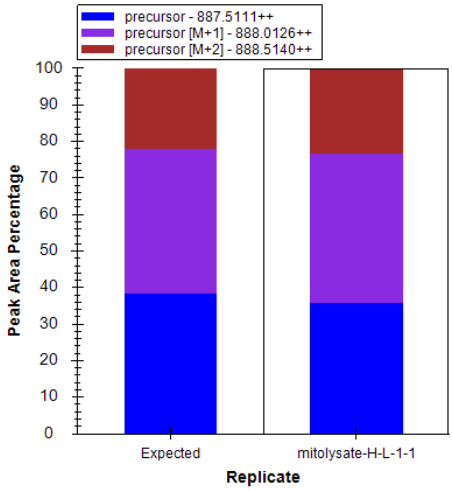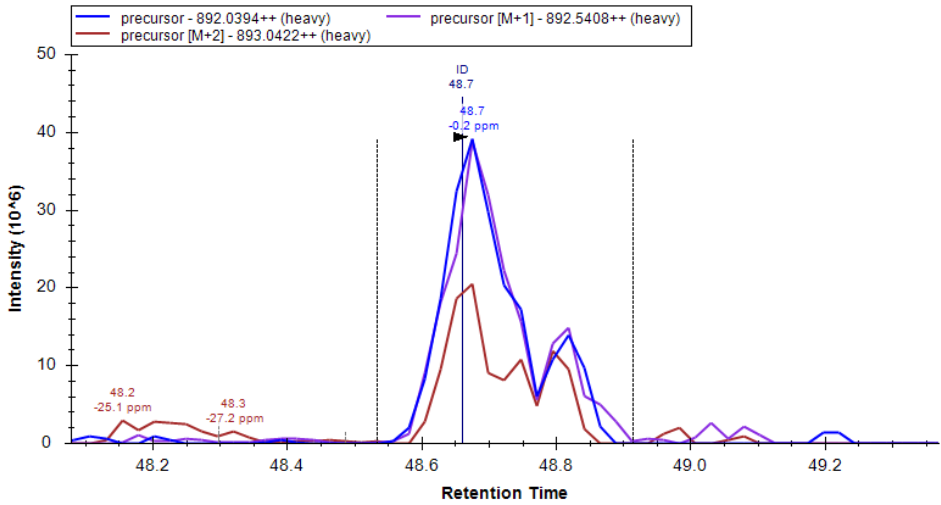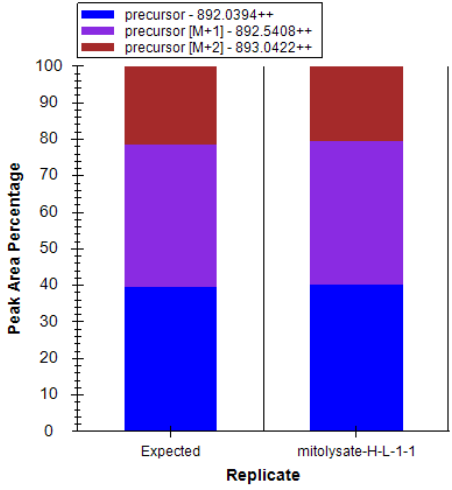

Replicate 1

# eEF1A

## R.GITIDIALWtri**K**FETPK.Y [69, 83] (missed 1)

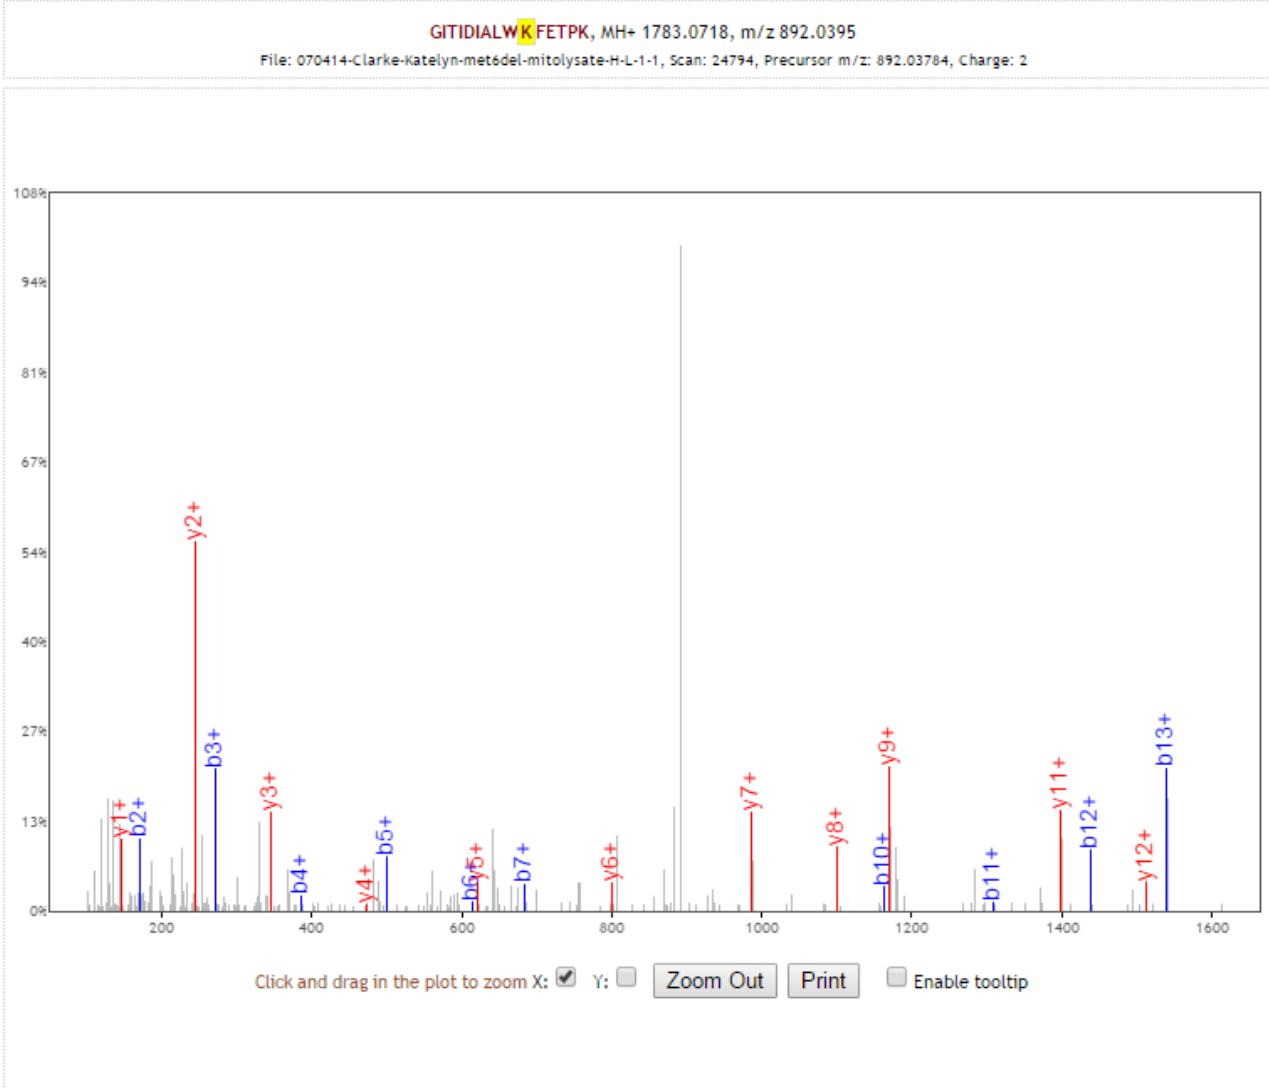

| b+        | #  | Seq | #  | y+        |
|-----------|----|-----|----|-----------|
| 58.0287   | 1  | G   | 15 |           |
| 171.1128  | 2  | I   | 14 | 1726.0503 |
| 272.1605  | 3  | T   | 13 | 1612.9663 |
| 385.2445  | 4  | I   | 12 | 1511.9186 |
| 500.2715  | 5  | D   | 11 | 1398.8345 |
| 613.3556  | 6  | I   | 10 | 1283.8076 |
| 684.3927  | 7  | A   | 9  | 1170.7235 |
| 797.4767  | 8  | L   | 8  | 1099.6864 |
| 983.5560  | 9  | W   | 7  | 986.6023  |
| 1162.7548 | 10 | K   | 6  | 800.5230  |
| 1309.8232 | 11 | F   | 5  | 621.3243  |
| 1438.8658 | 12 | E   | 4  | 474.2558  |
| 1539.9135 | 13 | T   | 3  | 345.2132  |
| 1636.9663 | 14 | P   | 2  | 244.1656  |
|           | 15 | K   | 1  | 147.1128  |

[\[Click\]](#) to move table

Static Modifications:  
 C: 57.02146  
 M: 3.0189

Variable Modifications:  
 K: 51.1038

# eEF1A

## K.STTTGHLIYmonoK.C [20, 29]

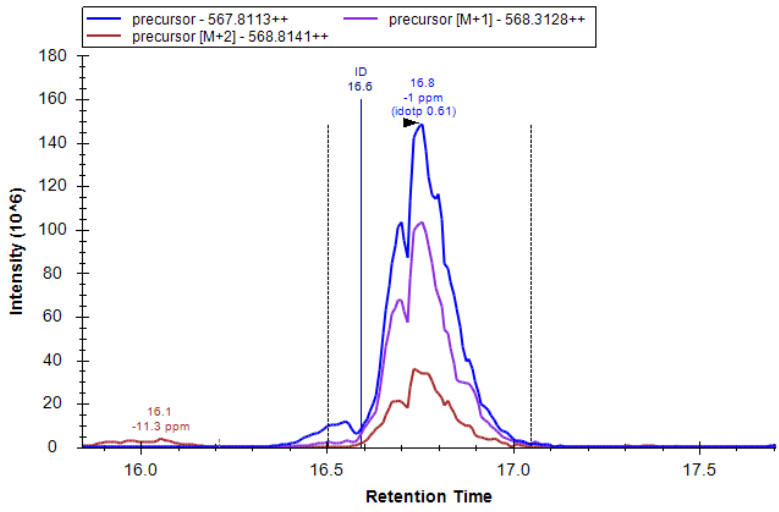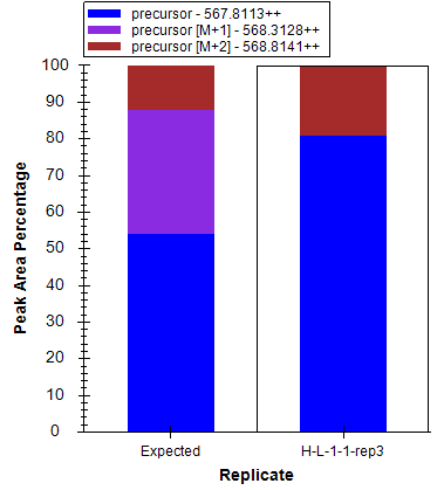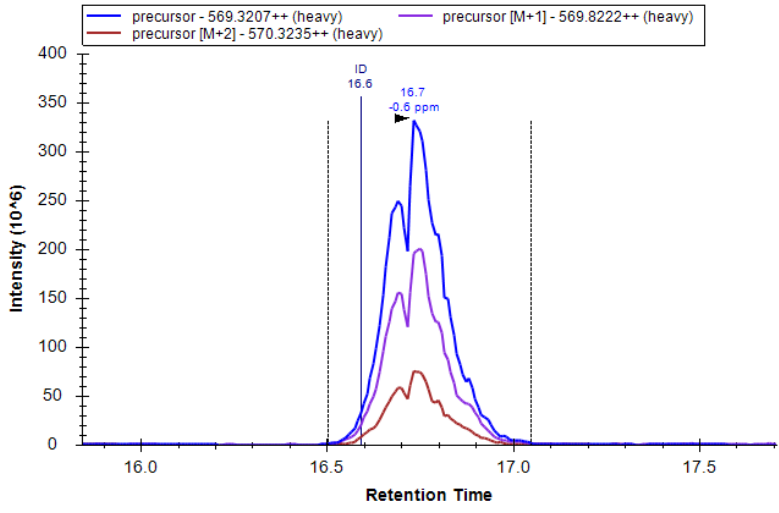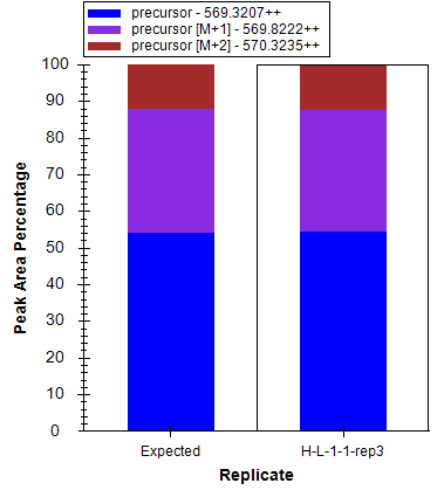

Replicate 3



# eEF1A

## K.STTTGHLIYmonoK.C [20, 29]

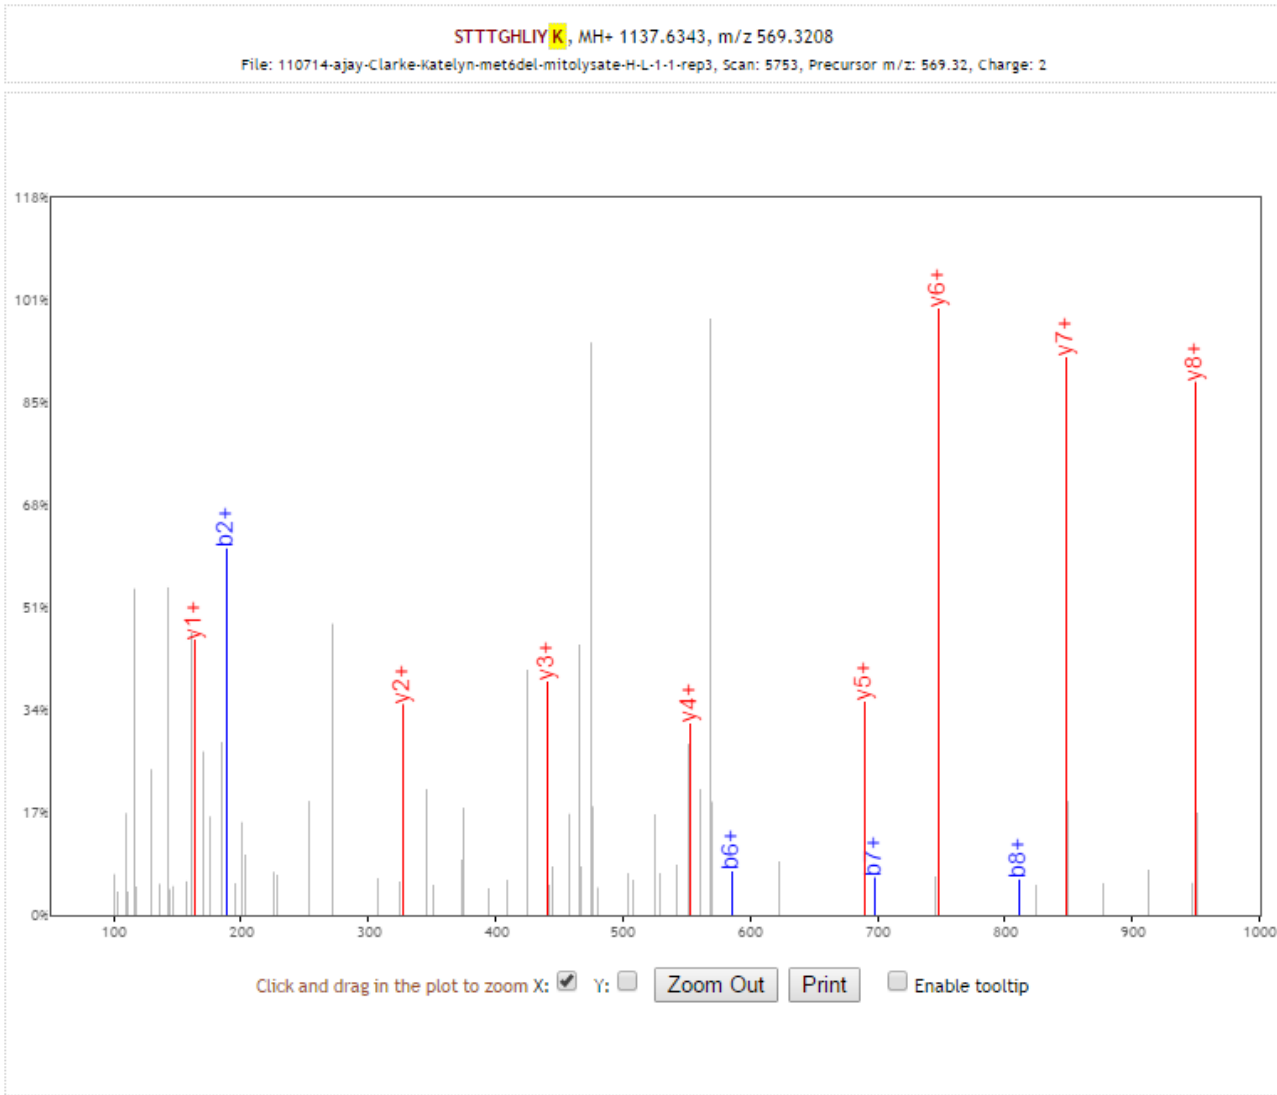

| b+       | #  | Seq # | y+        |
|----------|----|-------|-----------|
| 88.0393  | 1  | S 10  |           |
| 189.0870 | 2  | T 9   | 1050.6023 |
| 290.1347 | 3  | T 8   | 949.5546  |
| 391.1823 | 4  | T 7   | 848.5069  |
| 448.2038 | 5  | G 6   | 747.4592  |
| 585.2627 | 6  | H 5   | 690.4378  |
| 698.3468 | 7  | L 4   | 553.3789  |
| 811.4308 | 8  | I 3   | 440.2948  |
| 974.4942 | 9  | Y 2   | 327.2107  |
|          | 10 | K 1   | 164.1474  |

[\[Click\]](#) to move table

Static Modifications:  
 C: 57.02146  
 M: 3.0189

Variable Modifications:  
 K: 17.0346

Pdb1

R.EALNSAMAEELDmono**R**DDDVFLIGEEVAQYNGAYK.V [42, 73]  
(missed 1)

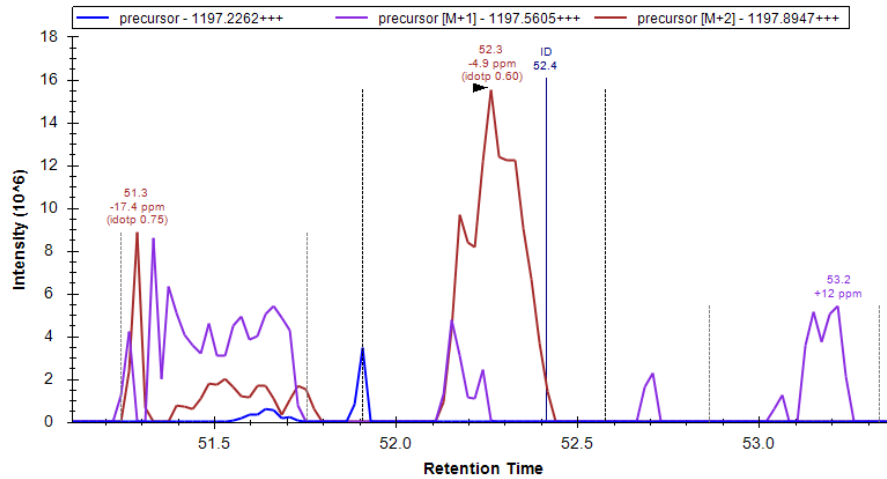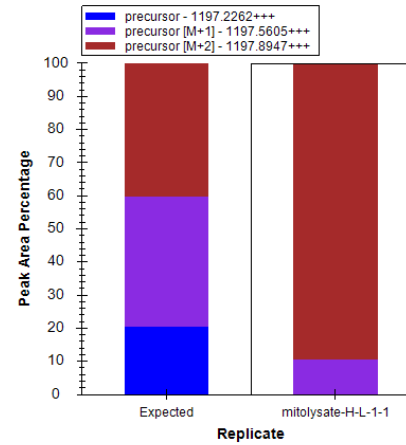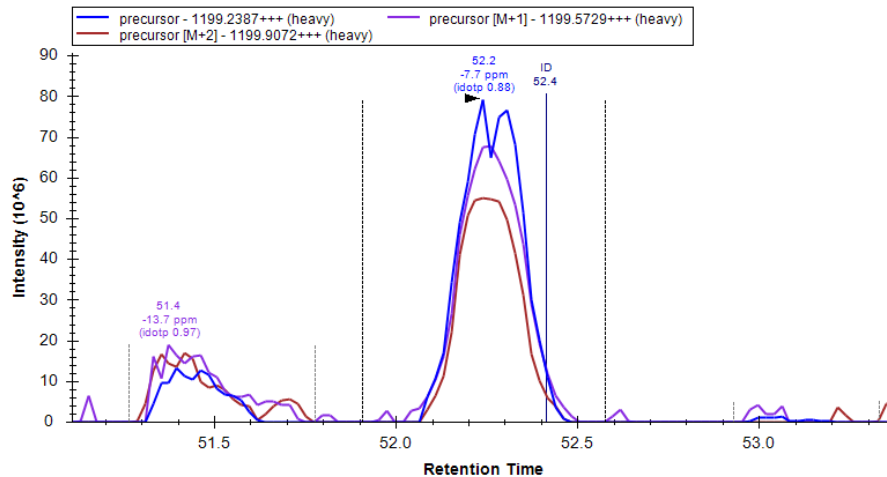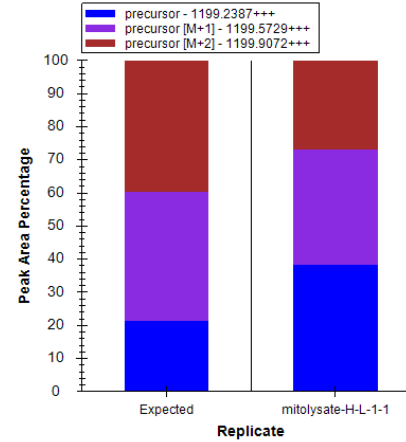

Replicate 1

# Pdb1

## R.EALNSAMAEELDmono**R**DDDVFLIGEEVAQYNGAYK.V [42, 73] (missed 1)

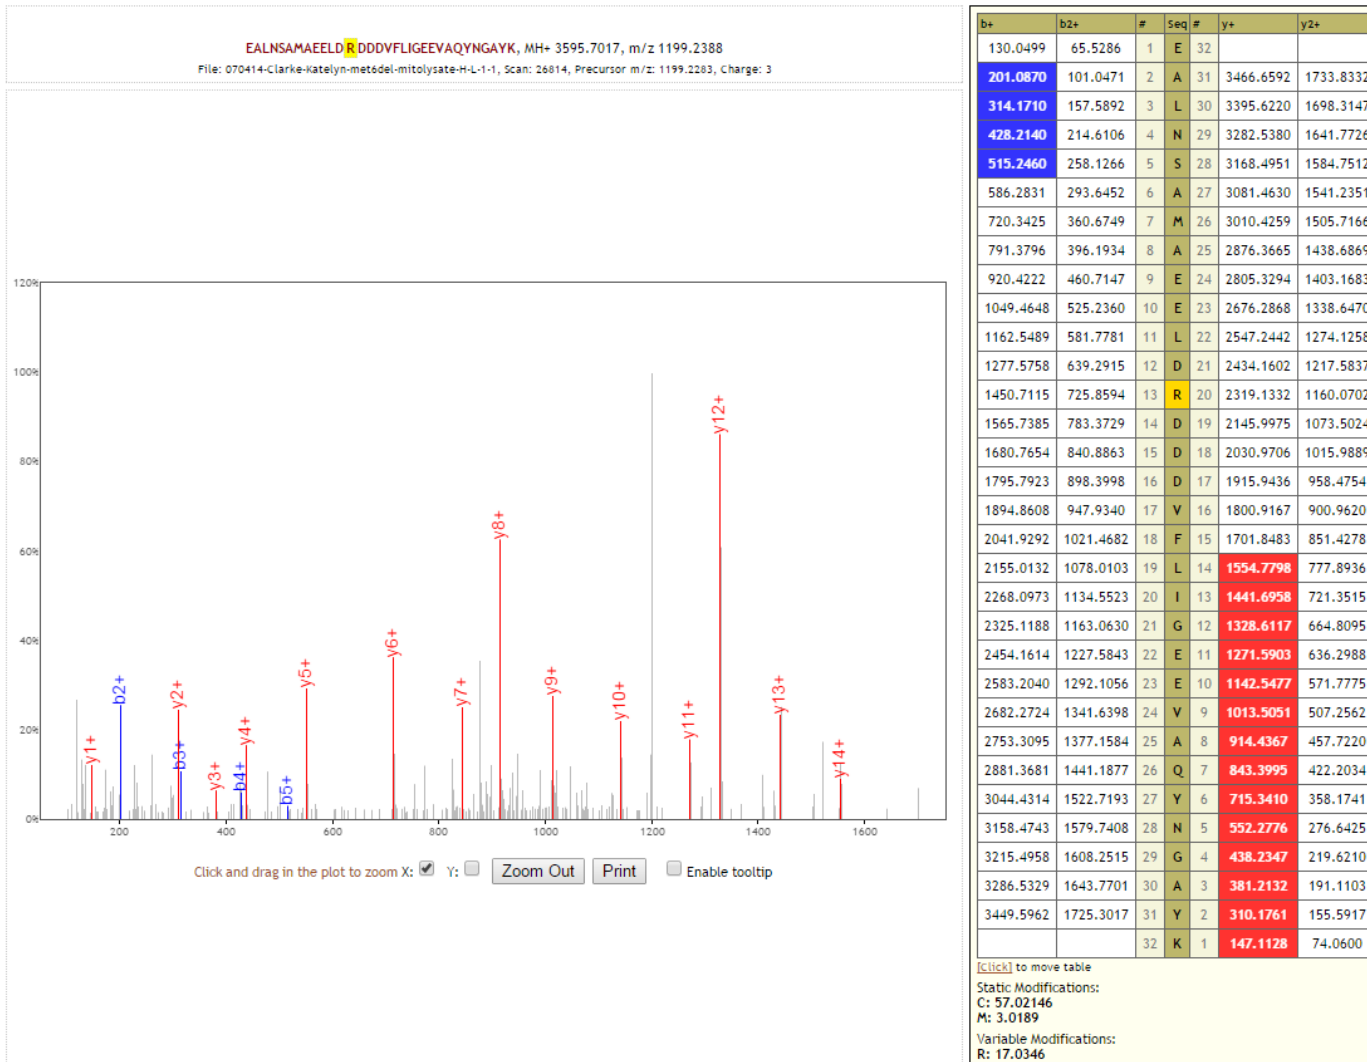

Replicate 1

Pdb1

R.EALNSAMAEELDmono**R**DDDVFLIGEEVAQYNGAYK.V [42, 73]  
(missed 1)

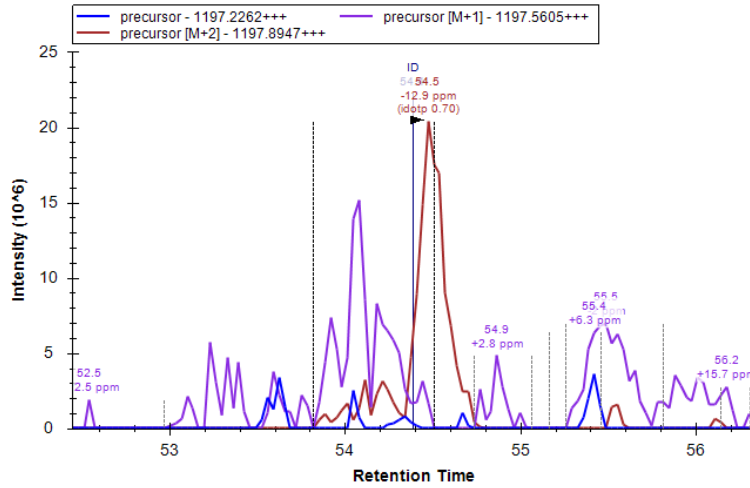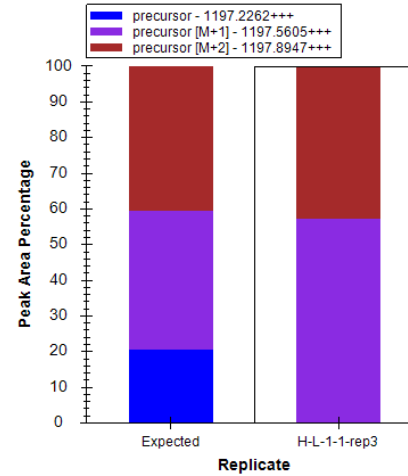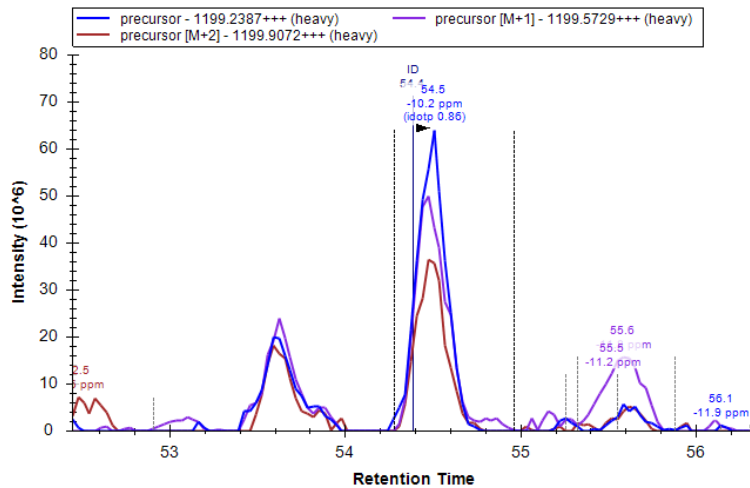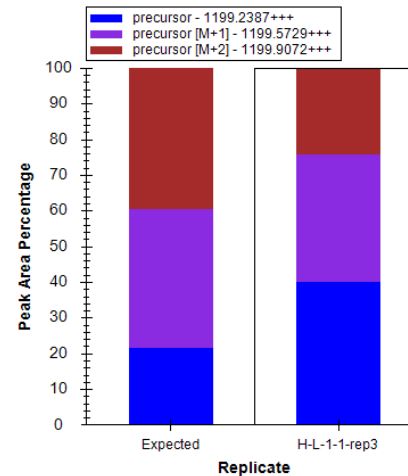

Replicate 3

# Pdb1

R.EALNSAMAEELDmono**R**DDDVFLIGEEVAQYNGAYK.V [42, 73]  
(missed 1)

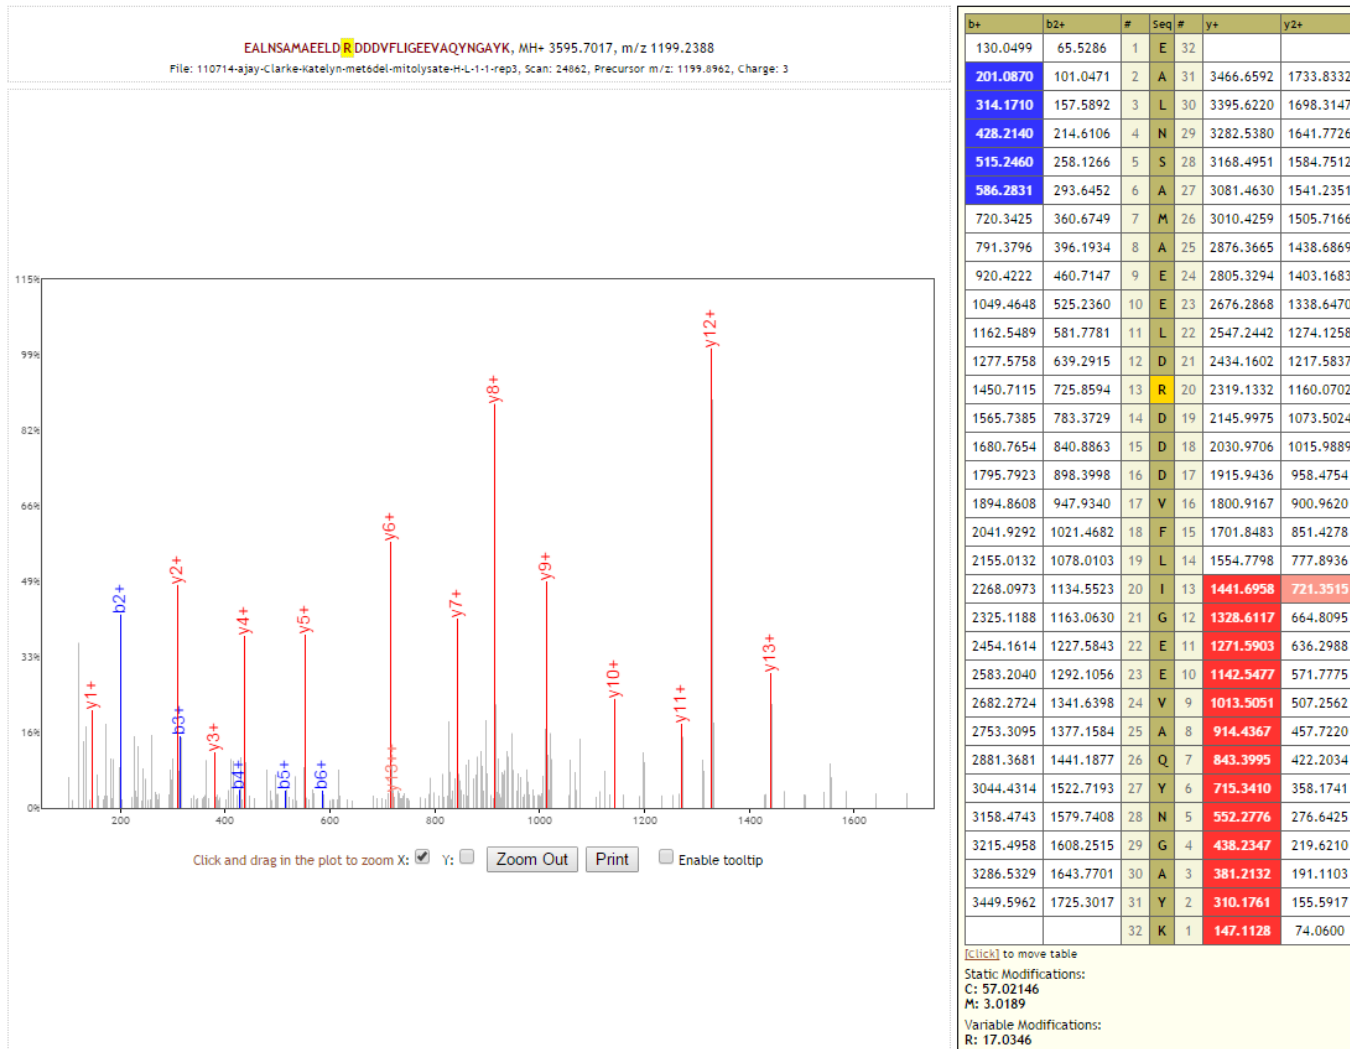

# Ald5

K.AVtri**K**NIAFGIFYNSGEVCCAGSR.I [305, 326] (missed 1)

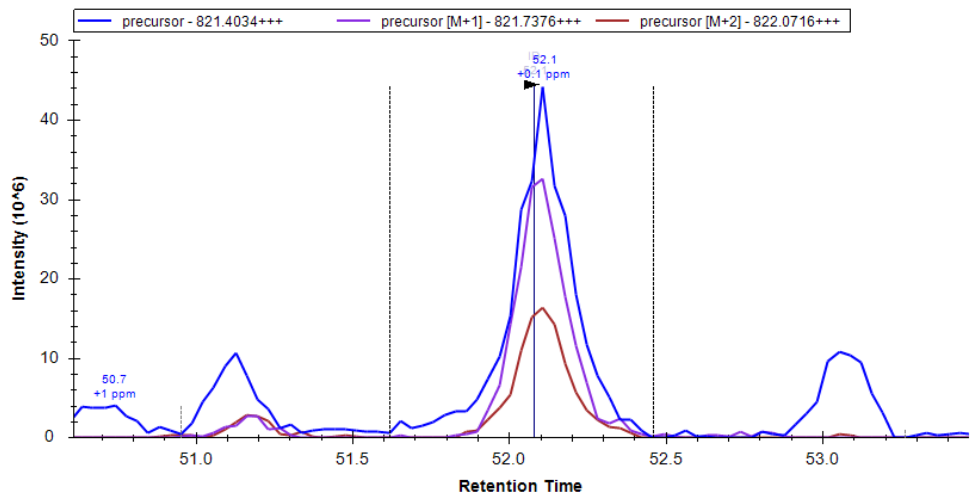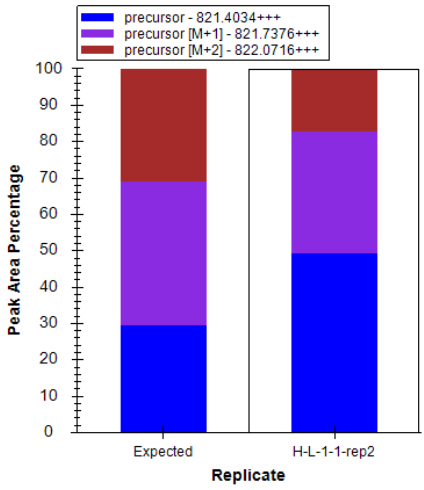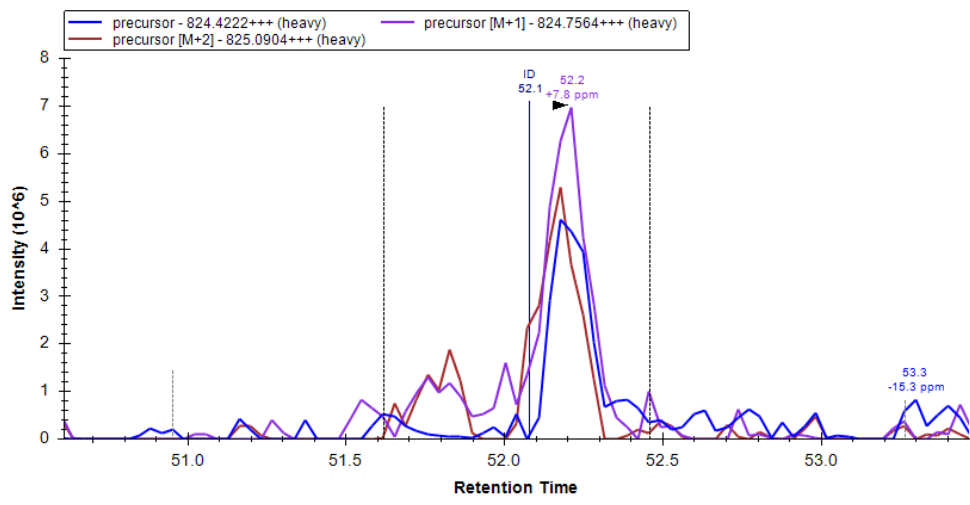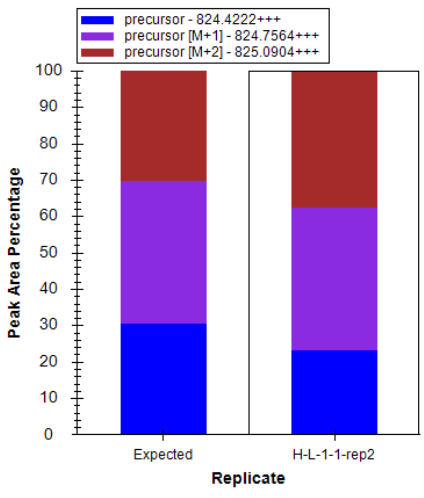

Replicate 2

# Ald5

## K.AVtri**K**NIAFGIFYNSGEVCCAGSR.I [305, 326] (missed 1)

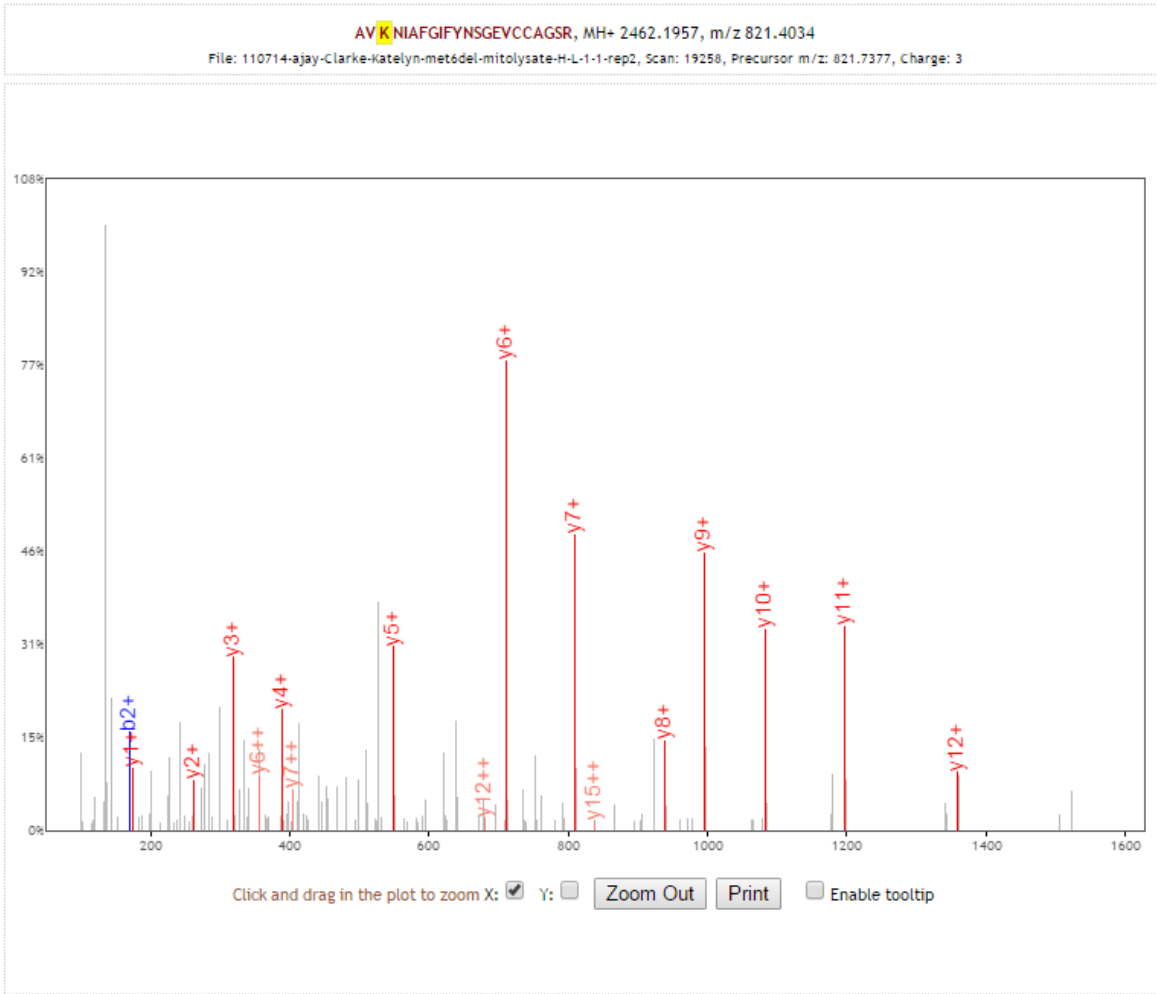

| b+              | b2+       | #  | Seq      | #  | y+               | y2+             |
|-----------------|-----------|----|----------|----|------------------|-----------------|
| 72.0444         | 36.5258   | 1  | A        | 22 |                  |                 |
| <b>171.1128</b> | 86.0600   | 2  | V        | 21 | 2391.1585        | 1196.0829       |
| 341.2549        | 171.1311  | 3  | <b>K</b> | 20 | 2292.0901        | 1146.5487       |
| 455.2978        | 228.1525  | 4  | N        | 19 | 2121.9481        | 1061.4777       |
| 568.3819        | 284.6946  | 5  | I        | 18 | 2007.9051        | 1004.4562       |
| 639.4190        | 320.2131  | 6  | A        | 17 | 1894.8211        | 947.9142        |
| 786.4874        | 393.7473  | 7  | F        | 16 | 1823.7840        | 912.3956        |
| 843.5088        | 422.2581  | 8  | G        | 15 | 1676.7155        | <b>838.8614</b> |
| 956.5929        | 478.8001  | 9  | I        | 14 | 1619.6941        | 810.3507        |
| 1103.6613       | 552.3343  | 10 | F        | 13 | 1506.6100        | 753.8086        |
| 1266.7247       | 633.8660  | 11 | Y        | 12 | <b>1359.5416</b> | <b>680.2744</b> |
| 1380.7676       | 690.8874  | 12 | N        | 11 | <b>1196.4783</b> | 598.7428        |
| 1467.7996       | 734.4034  | 13 | S        | 10 | <b>1082.4353</b> | 541.7213        |
| 1524.8211       | 762.9142  | 14 | G        | 9  | <b>995.4033</b>  | 498.2053        |
| 1653.8637       | 827.4355  | 15 | E        | 8  | <b>938.3819</b>  | 469.6946        |
| 1752.9321       | 876.9697  | 16 | V        | 7  | <b>809.3393</b>  | <b>405.1733</b> |
| 1912.9627       | 956.9850  | 17 | C        | 6  | <b>710.2708</b>  | <b>355.6391</b> |
| 2072.9934       | 1037.0003 | 18 | C        | 5  | <b>550.2402</b>  | 275.6237        |
| 2144.0305       | 1072.5189 | 19 | A        | 4  | <b>390.2096</b>  | 195.6084        |
| 2201.0519       | 1101.0296 | 20 | G        | 3  | <b>319.1724</b>  | 160.0899        |
| 2288.0840       | 1144.5456 | 21 | S        | 2  | <b>262.1510</b>  | 131.5791        |
|                 |           | 22 | R        | 1  | <b>175.1190</b>  | 88.0631         |

[\[Click\]](#) to move table  
 Static Modifications:  
 C: 57.02146  
 Variable Modifications:  
 K: 42.0471

# Ald5

K.AVtri**K**NIAFGIFYNSGEVCCAGSR.I [305, 326] (missed 1)

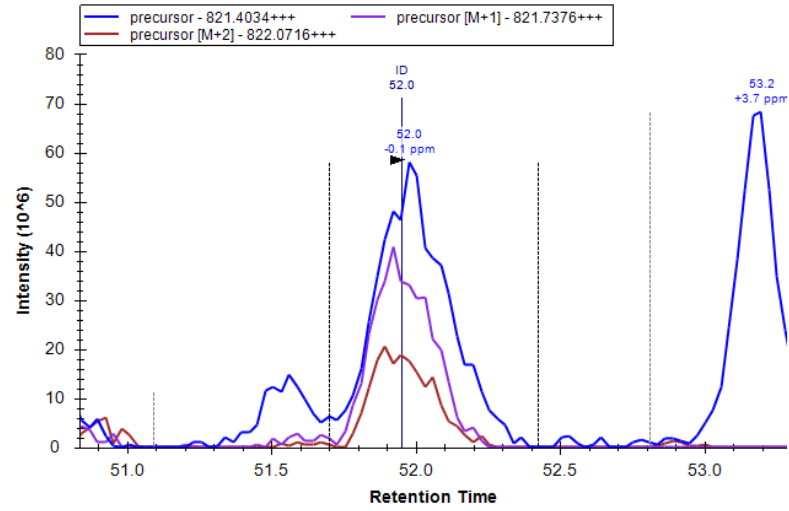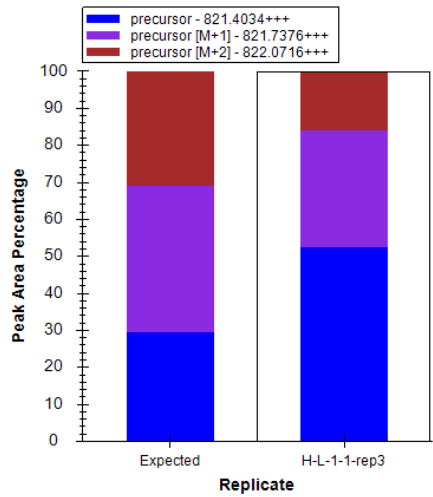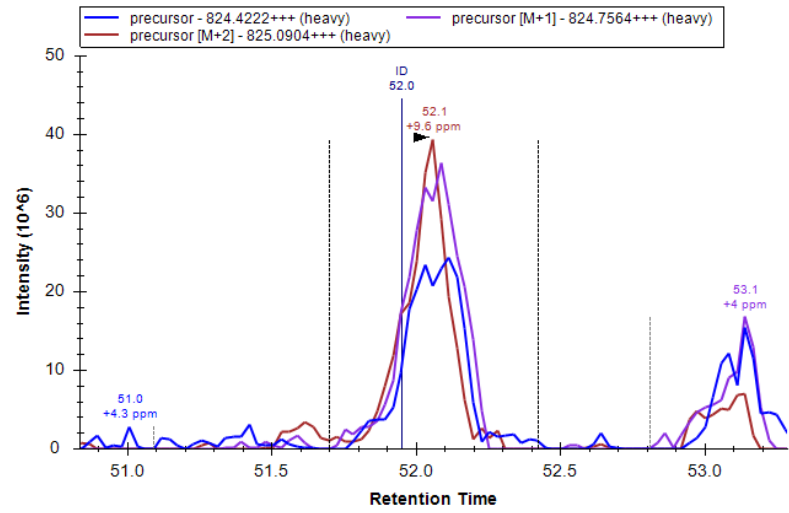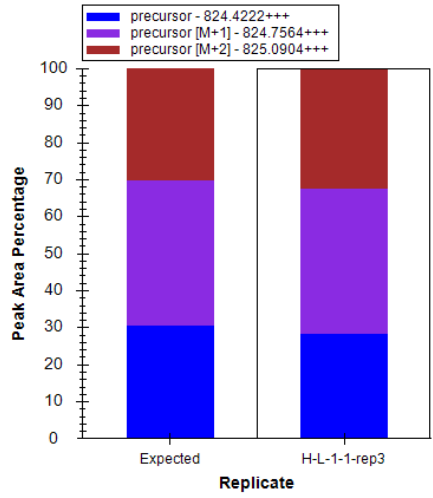

Replicate 3



# Ald5

## K.AVtri**K**NIAFGIFYNSGEVCCAGSR.I [305, 326] (missed 1)

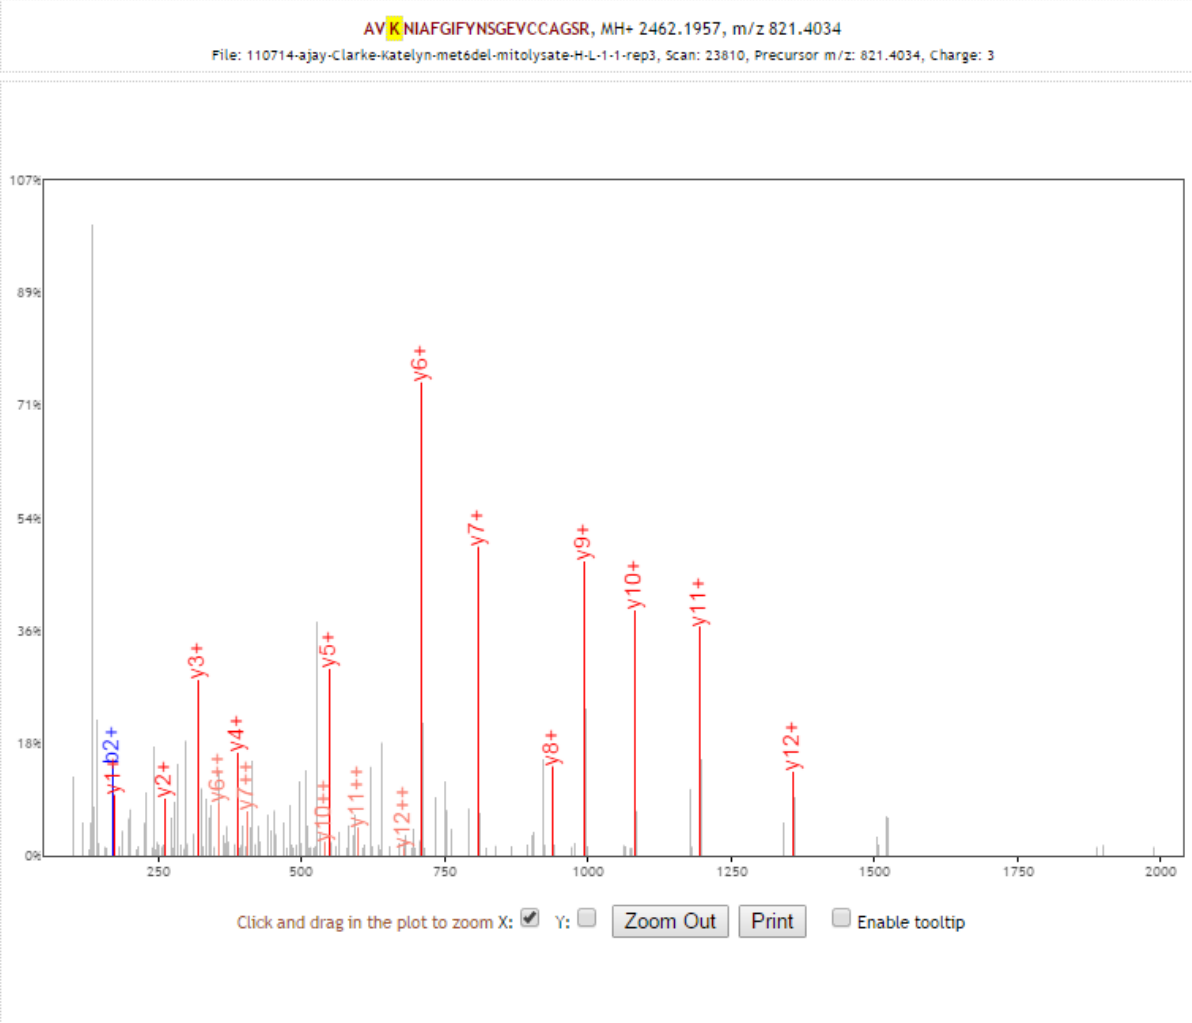

| b+              | b2+       | #  | Seq #       | y+               | y2+             |
|-----------------|-----------|----|-------------|------------------|-----------------|
| 72.0444         | 36.5258   | 1  | A 22        |                  |                 |
| <b>171.1128</b> | 86.0600   | 2  | V 21        | 2391.1585        | 1196.0829       |
| 341.2549        | 171.1311  | 3  | <b>K</b> 20 | 2292.0901        | 1146.5487       |
| 455.2978        | 228.1525  | 4  | N 19        | 2121.9481        | 1061.4777       |
| 568.3819        | 284.6946  | 5  | I 18        | 2007.9051        | 1004.4562       |
| 639.4190        | 320.2131  | 6  | A 17        | 1894.8211        | 947.9142        |
| 786.4874        | 393.7473  | 7  | F 16        | 1823.7840        | 912.3956        |
| 843.5088        | 422.2581  | 8  | G 15        | 1676.7155        | 838.8614        |
| 956.5929        | 478.8001  | 9  | I 14        | 1619.6941        | 810.3507        |
| 1103.6613       | 552.3343  | 10 | F 13        | 1506.6100        | 753.8086        |
| 1266.7247       | 633.8660  | 11 | Y 12        | <b>1359.5416</b> | <b>680.2744</b> |
| 1380.7676       | 690.8874  | 12 | N 11        | <b>1196.4783</b> | <b>598.7428</b> |
| 1467.7996       | 734.4034  | 13 | S 10        | <b>1082.4353</b> | <b>541.7213</b> |
| 1524.8211       | 762.9142  | 14 | G 9         | <b>995.4033</b>  | 498.2053        |
| 1653.8637       | 827.4355  | 15 | E 8         | <b>938.3819</b>  | 469.6946        |
| 1752.9321       | 876.9697  | 16 | V 7         | <b>809.3393</b>  | <b>405.1733</b> |
| 1912.9627       | 956.9850  | 17 | C 6         | <b>710.2708</b>  | <b>355.6391</b> |
| 2072.9934       | 1037.0003 | 18 | C 5         | <b>550.2402</b>  | 275.6237        |
| 2144.0305       | 1072.5189 | 19 | A 4         | <b>390.2096</b>  | 195.6084        |
| 2201.0519       | 1101.0296 | 20 | G 3         | <b>319.1724</b>  | 160.0899        |
| 2288.0840       | 1144.5456 | 21 | S 2         | <b>262.1510</b>  | 131.5791        |
|                 |           | 22 | R 1         | <b>175.1190</b>  | 88.0631         |

[\[Click\]](#) to move table  
 Static Modifications:  
 C: 57.02146  
 Variable Modifications:  
 K: 42.0471

# Ssa4

## K.monoKSEVFSTYADNQPGLIQVFEGER.T [421, 444] (missed 1)

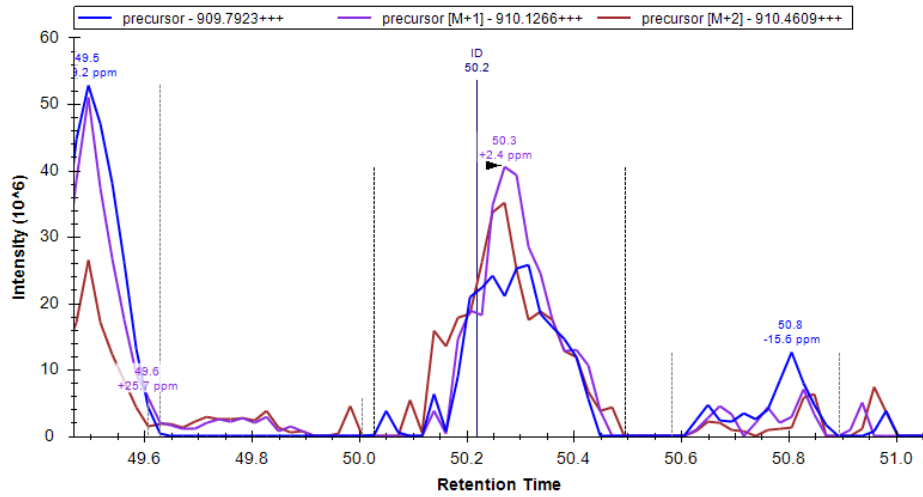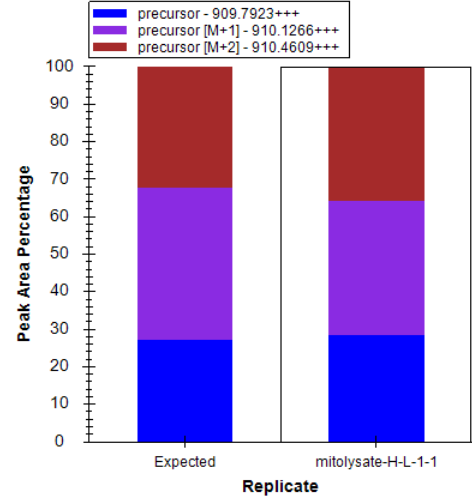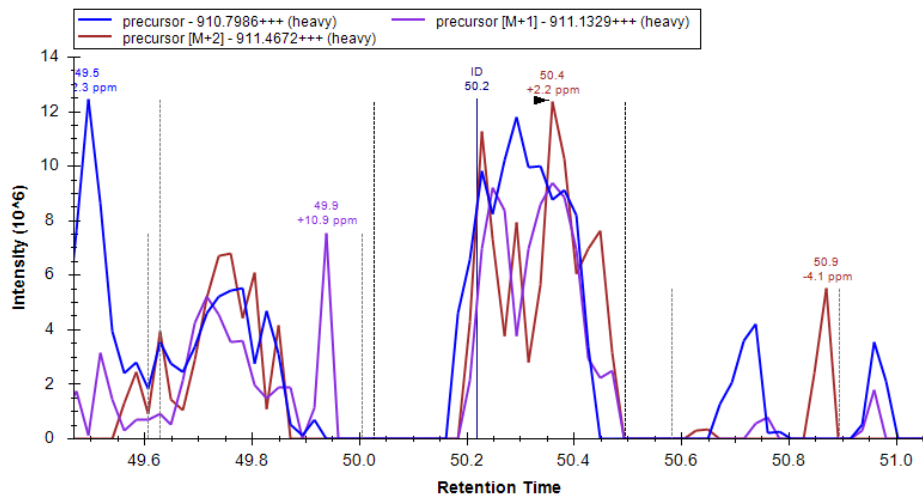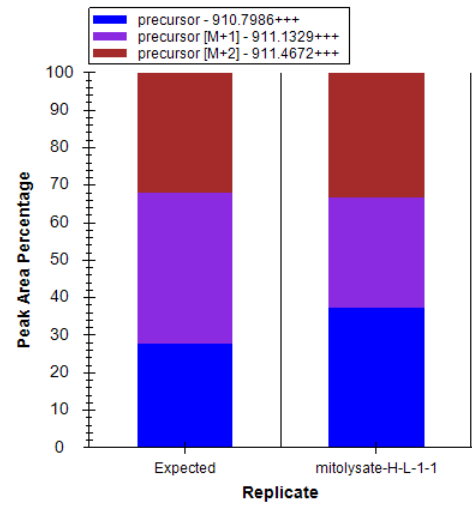

Replicate 1

# Ssa4

## K.mono**K**SEVFSTYADNQPGLVLIQVFEGE.R.T [421, 444] (missed 1)

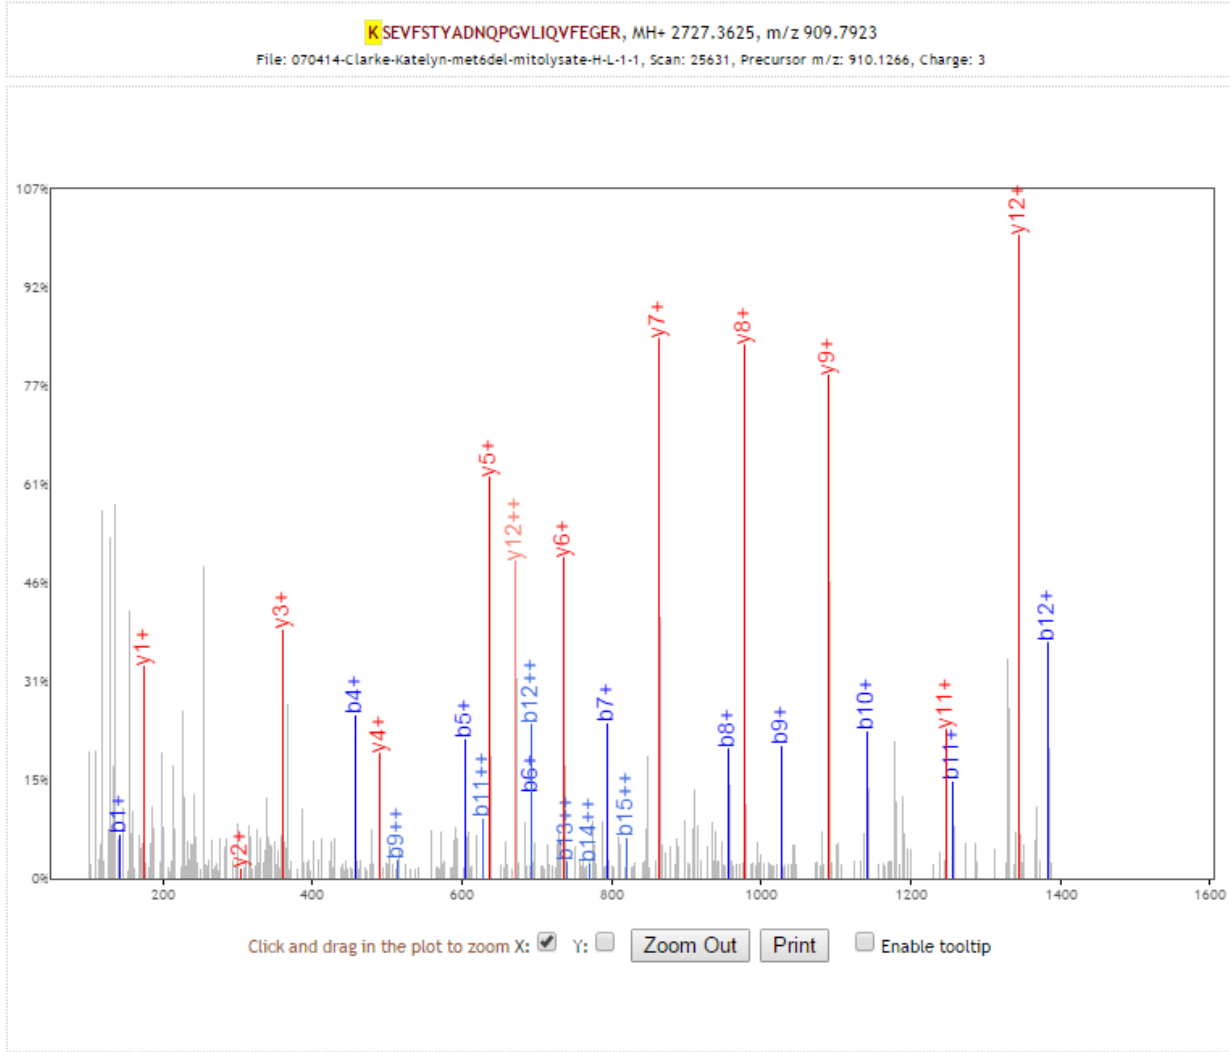

| b+        | b2+       | #  | Seq # | y+ | y2+                 |
|-----------|-----------|----|-------|----|---------------------|
| 143.1179  | 72.0626   | 1  | K     | 24 |                     |
| 230.1500  | 115.5786  | 2  | S     | 23 | 2585.2518 1293.1295 |
| 359.1926  | 180.0999  | 3  | E     | 22 | 2498.2198 1249.6135 |
| 458.2610  | 229.6341  | 4  | V     | 21 | 2369.1772 1185.0922 |
| 605.3294  | 303.1683  | 5  | F     | 20 | 2270.1088 1135.5580 |
| 692.3614  | 346.6843  | 6  | S     | 19 | 2123.0404 1062.0238 |
| 793.4091  | 397.2082  | 7  | T     | 18 | 2036.0083 1018.5078 |
| 956.4724  | 478.7399  | 8  | Y     | 17 | 1934.9607 967.9840  |
| 1027.5095 | 514.2584  | 9  | A     | 16 | 1771.8973 886.4523  |
| 1142.5365 | 571.7719  | 10 | D     | 15 | 1700.8602 850.9338  |
| 1256.5794 | 628.7933  | 11 | N     | 14 | 1585.8333 793.4203  |
| 1384.6380 | 692.8226  | 12 | Q     | 13 | 1471.7904 736.3988  |
| 1481.6907 | 741.3490  | 13 | P     | 12 | 1343.7318 672.3695  |
| 1538.7122 | 769.8597  | 14 | G     | 11 | 1246.6790 623.8431  |
| 1637.7806 | 819.3940  | 15 | V     | 10 | 1189.6575 595.3324  |
| 1750.8647 | 875.9360  | 16 | L     | 9  | 1090.5891 545.7982  |
| 1863.9488 | 932.4780  | 17 | I     | 8  | 977.5051 489.2562   |
| 1992.0073 | 996.5073  | 18 | Q     | 7  | 864.4210 432.7141   |
| 2091.0757 | 1046.0415 | 19 | V     | 6  | 736.3624 368.6849   |
| 2238.1442 | 1119.5757 | 20 | F     | 5  | 637.2940 319.1506   |
| 2367.1868 | 1184.0970 | 21 | E     | 4  | 490.2256 245.6164   |
| 2424.2082 | 1212.6077 | 22 | G     | 3  | 361.1830 181.0951   |
| 2553.2508 | 1277.1290 | 23 | E     | 2  | 304.1615 152.5844   |
|           |           | 24 | R     | 1  | 175.1190 88.0631    |

[\[click\]](#) to move table  
 Static Modifications:  
 C: 57.02146  
 Variable Modifications:  
 K: 14.0157

# Ssa4

K.mono**K**SEVFSTYADNQPGLIQVFEGER.T [421, 444] (missed 1)

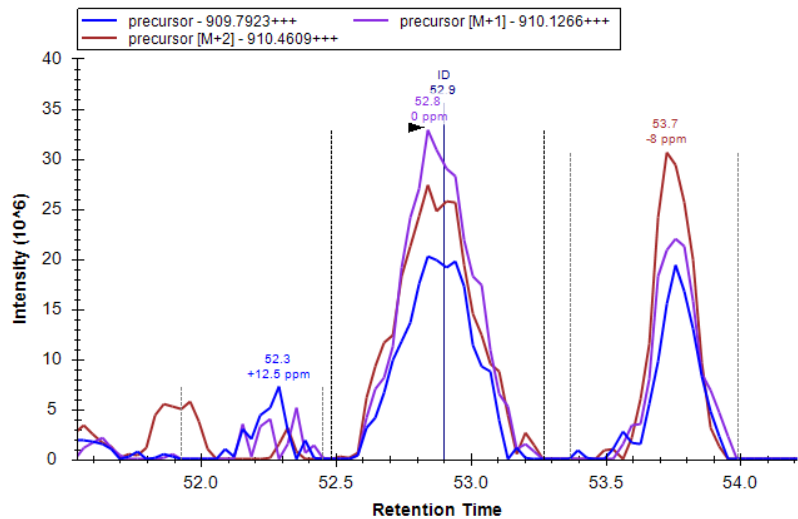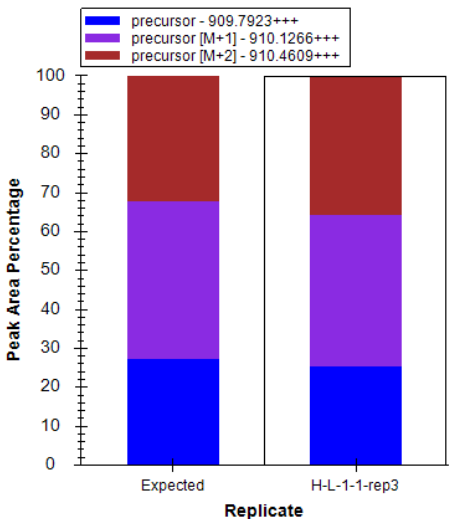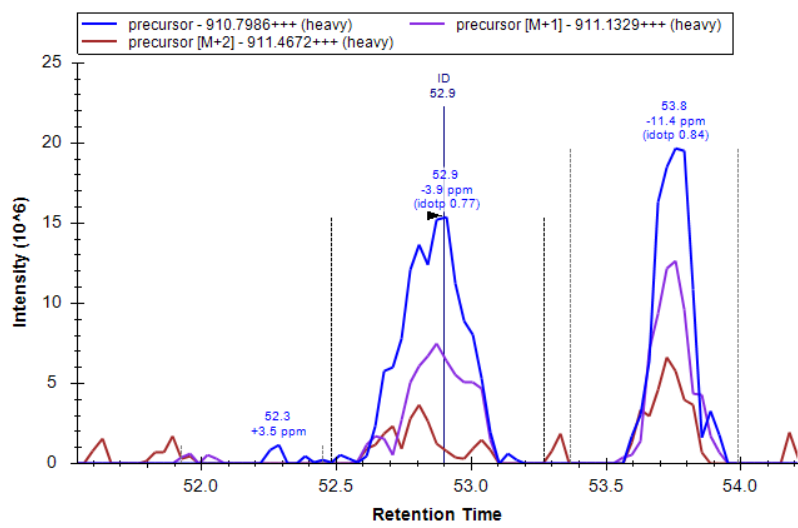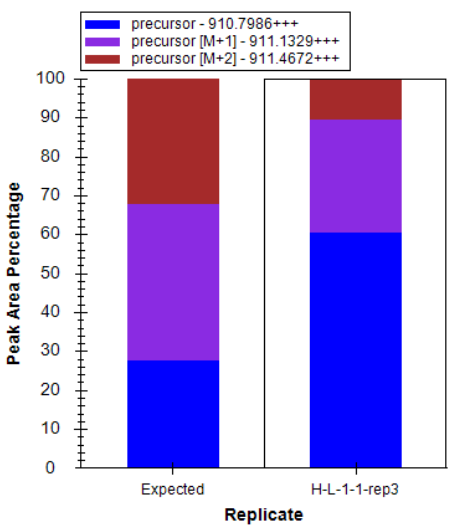

Replicate 3

# Ssa4

## K.mono**K**SEVFSTYADNQPGLVLIQVFEGE.R.T [421, 444] (missed 1)

**K**SEVFSTYADNQPGLVLIQVFEGE.R, MH+ 2727.3625, m/z 909.7923

File: 110714-ajay-Clarke-Katelyn-met6del-mitolytate-H-L-1-1-rep3, Scan: 24214, Precursor m/z: 910.1284, Charge: 3

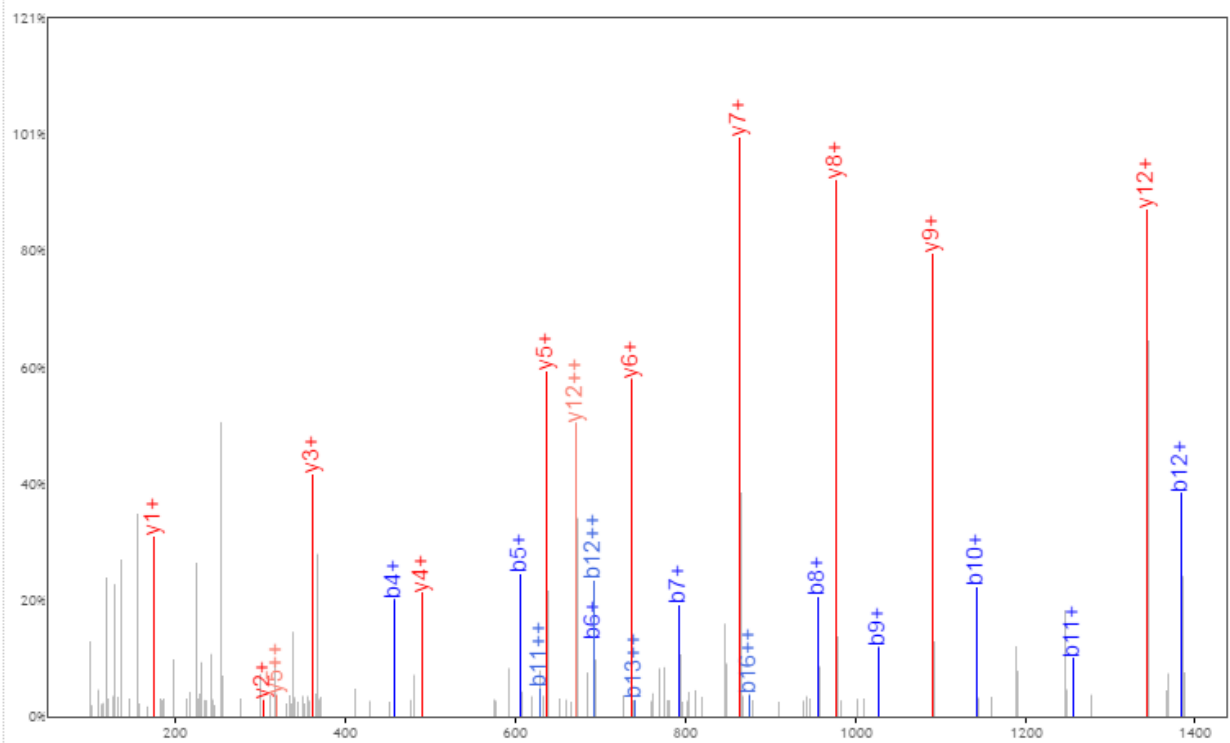

Click and drag in the plot to zoom X:  Y:  Zoom Out Print  Enable tooltip

| b+        | b2+       | #  | Seq # | y+        | y2+       |
|-----------|-----------|----|-------|-----------|-----------|
| 143.1179  | 72.0626   | 1  | K 24  |           |           |
| 230.1500  | 115.5786  | 2  | S 23  | 2585.2518 | 1293.1295 |
| 359.1926  | 180.0999  | 3  | E 22  | 2498.2198 | 1249.6135 |
| 458.2610  | 229.6341  | 4  | V 21  | 2369.1772 | 1185.0922 |
| 605.3294  | 303.1683  | 5  | F 20  | 2270.1088 | 1135.5580 |
| 692.3614  | 346.6843  | 6  | S 19  | 2123.0404 | 1062.0238 |
| 793.4091  | 397.2082  | 7  | T 18  | 2036.0083 | 1018.5078 |
| 956.4724  | 478.7399  | 8  | Y 17  | 1934.9607 | 967.9840  |
| 1027.5095 | 514.2584  | 9  | A 16  | 1771.8973 | 886.4523  |
| 1142.5365 | 571.7719  | 10 | D 15  | 1700.8602 | 850.9338  |
| 1256.5794 | 628.7933  | 11 | N 14  | 1585.8333 | 793.4203  |
| 1384.6380 | 692.8226  | 12 | Q 13  | 1471.7904 | 736.3988  |
| 1481.6907 | 741.3490  | 13 | P 12  | 1343.7318 | 672.3695  |
| 1538.7122 | 769.8597  | 14 | G 11  | 1246.6790 | 623.8431  |
| 1637.7806 | 819.3940  | 15 | V 10  | 1189.6575 | 595.3324  |
| 1750.8647 | 875.9360  | 16 | L 9   | 1090.5891 | 545.7982  |
| 1863.9488 | 932.4780  | 17 | I 8   | 977.5051  | 489.2562  |
| 1992.0073 | 996.5073  | 18 | Q 7   | 864.4210  | 432.7141  |
| 2091.0757 | 1046.0415 | 19 | V 6   | 736.3624  | 368.6849  |
| 2238.1442 | 1119.5757 | 20 | F 5   | 637.2940  | 319.1506  |
| 2367.1868 | 1184.0970 | 21 | E 4   | 490.2256  | 245.6164  |
| 2424.2082 | 1212.6077 | 22 | G 3   | 361.1830  | 181.0951  |
| 2553.2508 | 1277.1290 | 23 | E 2   | 304.1615  | 152.5844  |
|           |           | 24 | R 1   | 175.1190  | 88.0631   |

[\[click\]](#) to move table

Static Modifications:  
C: 57.02146

Variable Modifications:  
K: 14.0157

# Ssa2

K.mono**K**SEVFSTYADNQPGLIQVFEGER.A [420, 443] (missed 1)

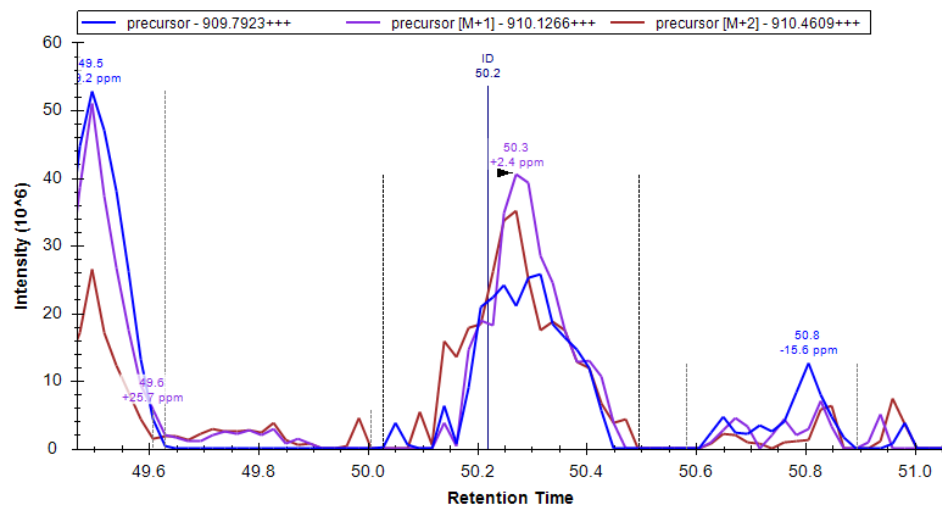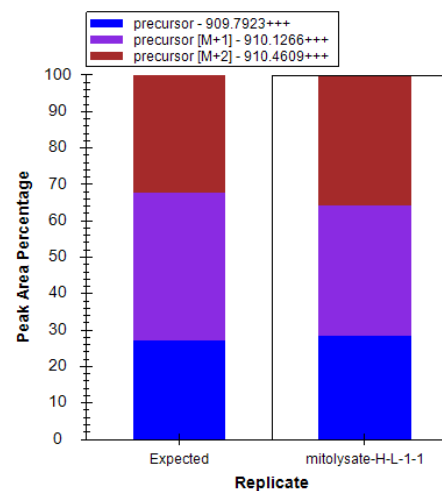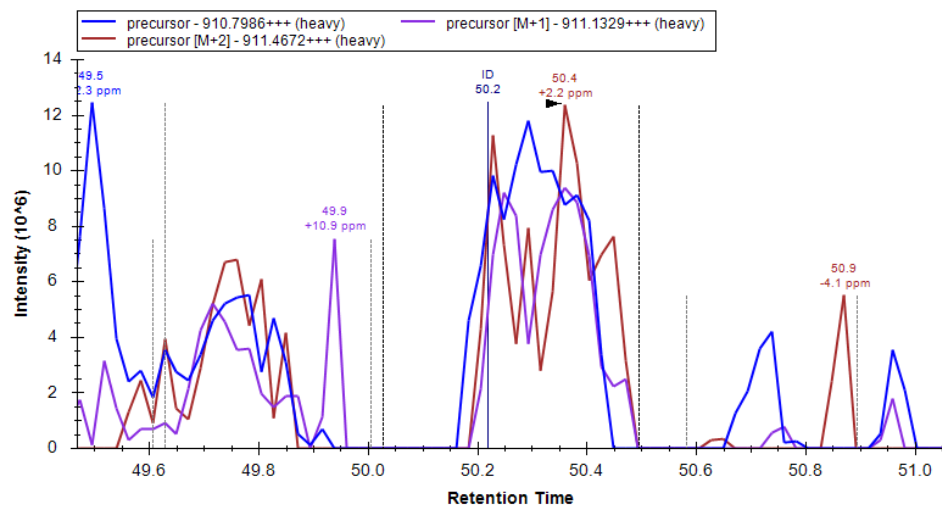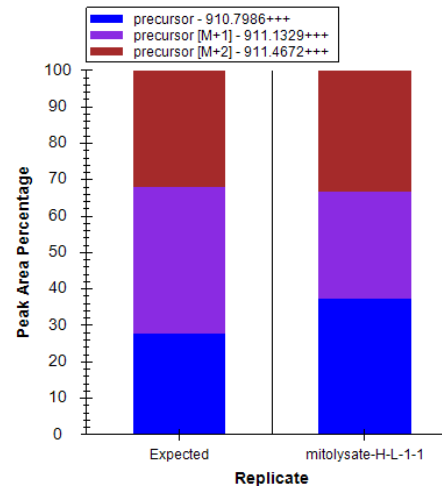

Replicate 1

# Ssa2

## K.mono**K**SEVFSTYADNQPGLVLIQVFEGE.R.A [420, 443] (missed 1)

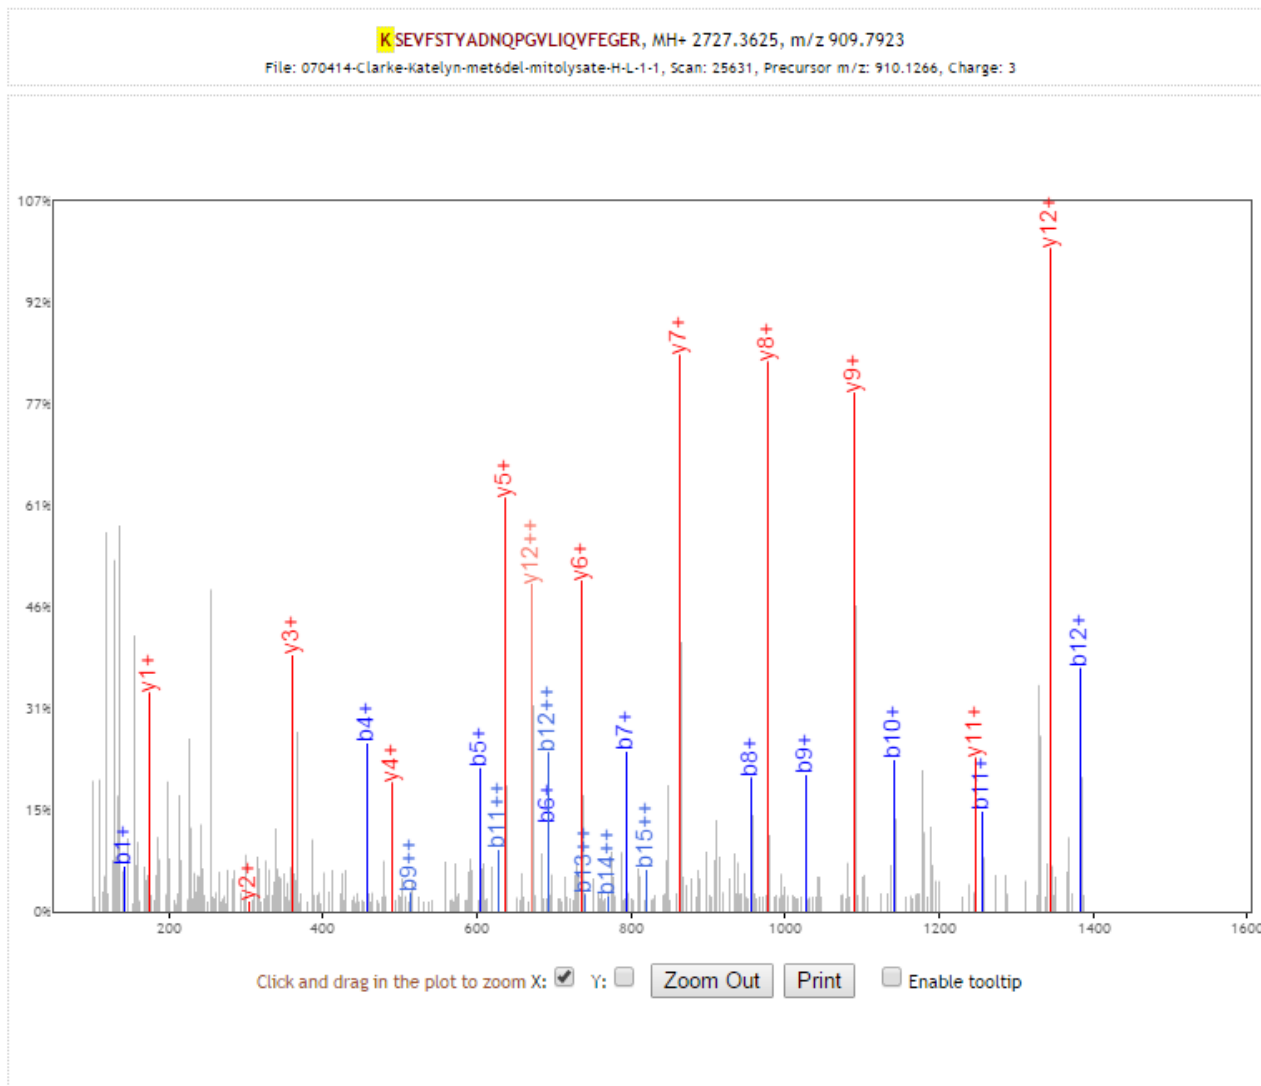

| b+        | b2+       | #  | Seq #    | y+ | y2+                              |
|-----------|-----------|----|----------|----|----------------------------------|
| 143.1179  | 72.0626   | 1  | <b>K</b> | 24 |                                  |
| 230.1500  | 115.5786  | 2  | S        | 23 | 2585.2518 1293.1295              |
| 359.1926  | 180.0999  | 3  | E        | 22 | 2498.2198 1249.6135              |
| 458.2610  | 229.6341  | 4  | V        | 21 | 2369.1772 1185.0922              |
| 605.3294  | 303.1683  | 5  | F        | 20 | 2270.1088 1135.5580              |
| 692.3614  | 346.6843  | 6  | S        | 19 | 2123.0404 1062.0238              |
| 793.4091  | 397.2082  | 7  | T        | 18 | 2036.0083 1018.5078              |
| 956.4724  | 478.7399  | 8  | Y        | 17 | 1934.9607 967.9840               |
| 1027.5095 | 514.2584  | 9  | A        | 16 | 1771.8973 886.4523               |
| 1142.5365 | 571.7719  | 10 | D        | 15 | 1700.8602 850.9338               |
| 1256.5794 | 628.7933  | 11 | N        | 14 | 1585.8333 793.4203               |
| 1384.6380 | 692.8226  | 12 | Q        | 13 | 1471.7904 736.3988               |
| 1481.6907 | 741.3490  | 13 | P        | 12 | <b>1343.7318</b> <b>672.3695</b> |
| 1538.7122 | 769.8597  | 14 | G        | 11 | <b>1246.6790</b> 623.8431        |
| 1637.7806 | 819.3940  | 15 | V        | 10 | 1189.6575 595.3324               |
| 1750.8647 | 875.9360  | 16 | L        | 9  | <b>1090.5891</b> 545.7982        |
| 1863.9488 | 932.4780  | 17 | I        | 8  | <b>977.5051</b> 489.2562         |
| 1992.0073 | 996.5073  | 18 | Q        | 7  | <b>864.4210</b> 432.7141         |
| 2091.0757 | 1046.0415 | 19 | V        | 6  | <b>736.3624</b> 368.6849         |
| 2238.1442 | 1119.5757 | 20 | F        | 5  | <b>637.2940</b> 319.1506         |
| 2367.1868 | 1184.0970 | 21 | E        | 4  | <b>490.2256</b> 245.6164         |
| 2424.2082 | 1212.6077 | 22 | G        | 3  | <b>361.1830</b> 181.0951         |
| 2553.2508 | 1277.1290 | 23 | E        | 2  | <b>304.1615</b> 152.5844         |
|           |           | 24 | R        | 1  | <b>175.1190</b> 88.0631          |

[\[Click\]](#) to move table  
Static Modifications:  
C: 57.02146  
Variable Modifications:  
K: 14.0157

Replicate 1

# Ssa2

K.mono**K**SEVFSTYADNQPGLIQLVFEGER.A [420, 443] (missed 1)

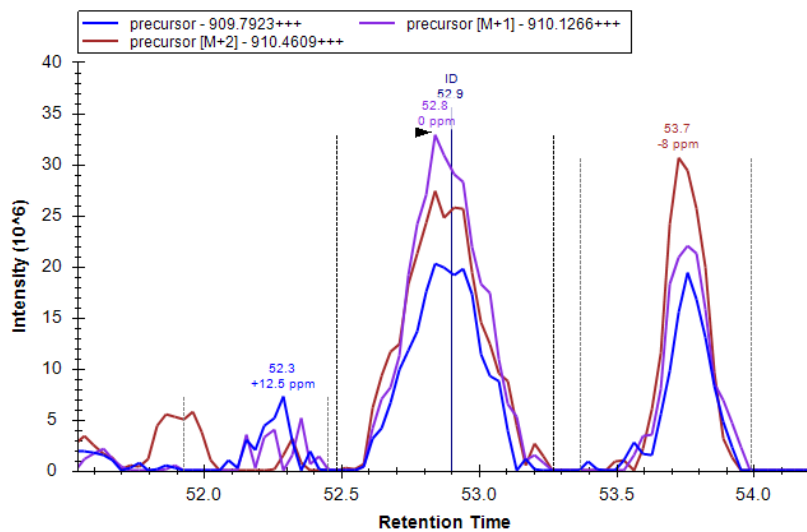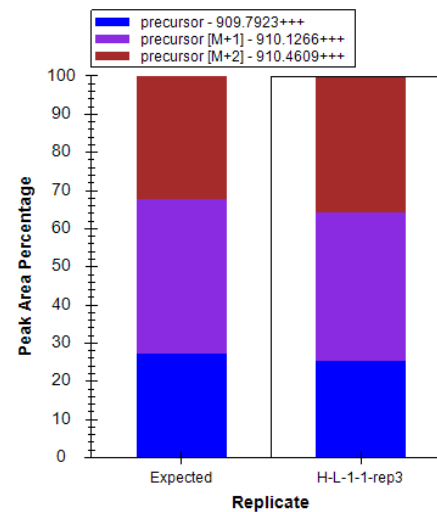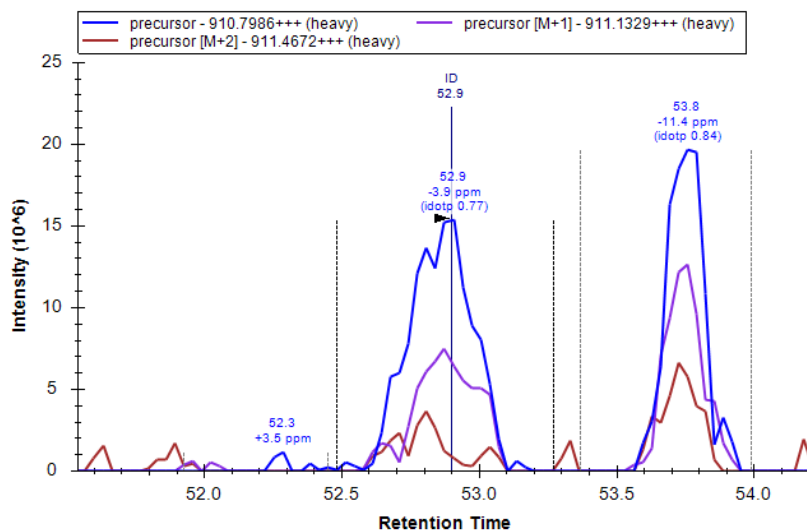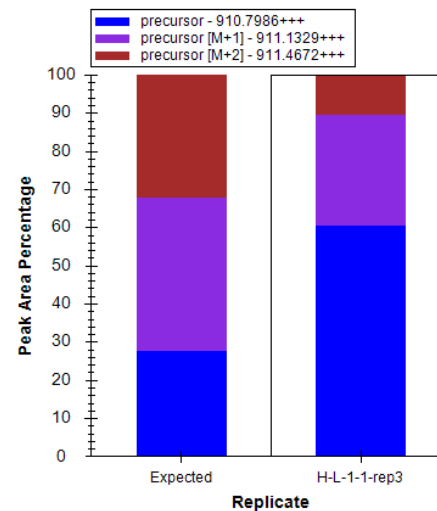

Replicate 3



# Ssa2

## K.mono**K**SEVFSTYADNQPGLIQVFEGER.A [420, 443] (missed 1)

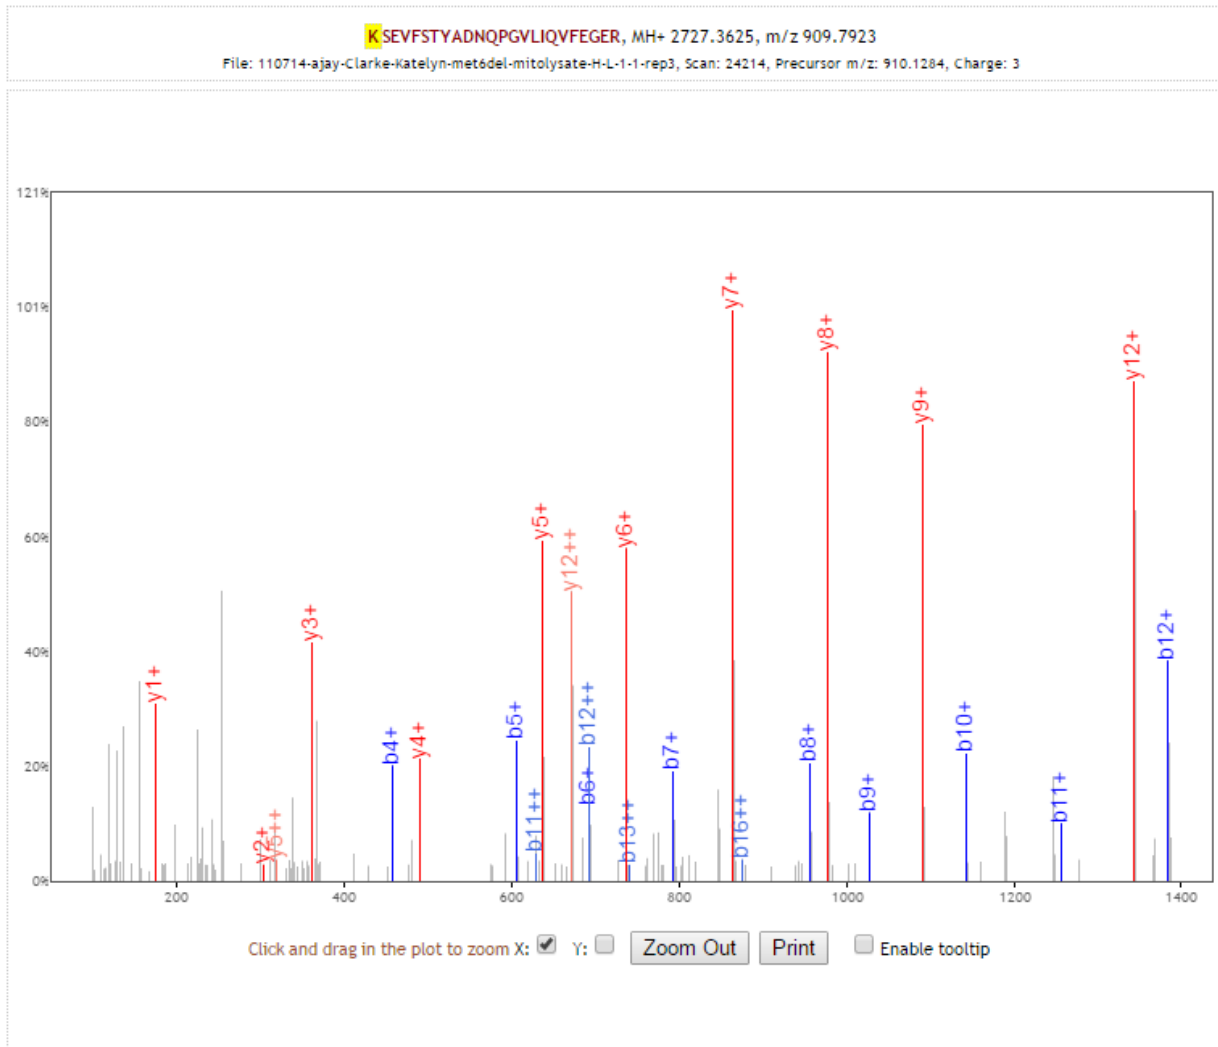

| b+        | b2+       | #  | Seq #    | y+ | y2+                       |
|-----------|-----------|----|----------|----|---------------------------|
| 143.1179  | 72.0626   | 1  | <b>K</b> | 24 |                           |
| 230.1500  | 115.5786  | 2  | S        | 23 | 2585.2518 1293.1295       |
| 359.1926  | 180.0999  | 3  | E        | 22 | 2498.2198 1249.6135       |
| 458.2610  | 229.6341  | 4  | V        | 21 | 2369.1772 1185.0922       |
| 605.3294  | 303.1683  | 5  | F        | 20 | 2270.1088 1135.5580       |
| 692.3614  | 346.6843  | 6  | S        | 19 | 2123.0404 1062.0238       |
| 793.4091  | 397.2082  | 7  | T        | 18 | 2036.0083 1018.5078       |
| 956.4724  | 478.7399  | 8  | Y        | 17 | 1934.9607 967.9840        |
| 1027.5095 | 514.2584  | 9  | A        | 16 | 1771.8973 886.4523        |
| 1142.5365 | 571.7719  | 10 | D        | 15 | 1700.8602 850.9338        |
| 1256.5794 | 628.7933  | 11 | N        | 14 | 1585.8333 793.4203        |
| 1384.6380 | 692.8226  | 12 | Q        | 13 | 1471.7904 736.3988        |
| 1481.6907 | 741.3490  | 13 | P        | 12 | <b>1343.7318 672.3695</b> |
| 1538.7122 | 769.8597  | 14 | G        | 11 | 1246.6790 623.8431        |
| 1637.7806 | 819.3940  | 15 | V        | 10 | 1189.6575 595.3324        |
| 1750.8647 | 875.9360  | 16 | L        | 9  | <b>1090.5891 545.7982</b> |
| 1863.9488 | 932.4780  | 17 | I        | 8  | <b>977.5051 489.2562</b>  |
| 1992.0073 | 996.5073  | 18 | Q        | 7  | <b>864.4210 432.7141</b>  |
| 2091.0757 | 1046.0415 | 19 | V        | 6  | <b>736.3624 368.6849</b>  |
| 2238.1442 | 1119.5757 | 20 | F        | 5  | <b>637.2940 319.1506</b>  |
| 2367.1868 | 1184.0970 | 21 | E        | 4  | <b>490.2256 245.6164</b>  |
| 2424.2082 | 1212.6077 | 22 | G        | 3  | <b>361.1830 181.0951</b>  |
| 2553.2508 | 1277.1290 | 23 | E        | 2  | <b>304.1615 152.5844</b>  |
|           |           | 24 | R        | 1  | <b>175.1190 88.0631</b>   |

[\[Click\]](#) to move table  
 Static Modifications:  
 C: 57.02146  
 Variable Modifications:  
 K: 14.0157

# Hsp60

K.QIENAGEEGSVIIGtri**K**LIDEYGDDFAK.G [474, 500] (missed 1)

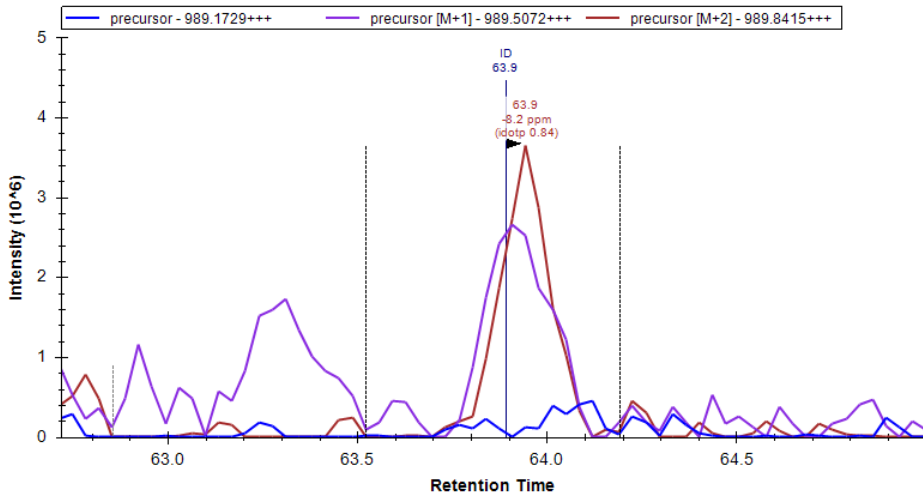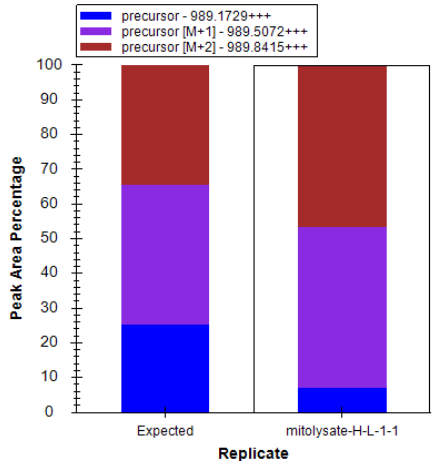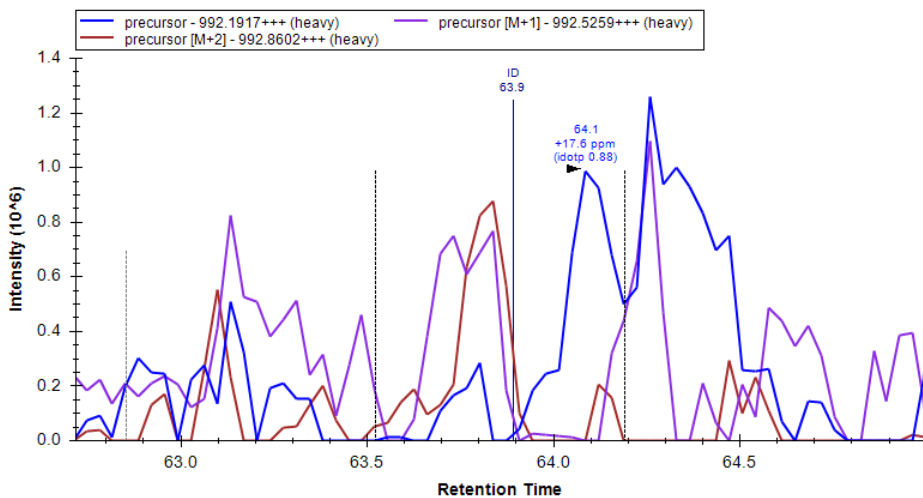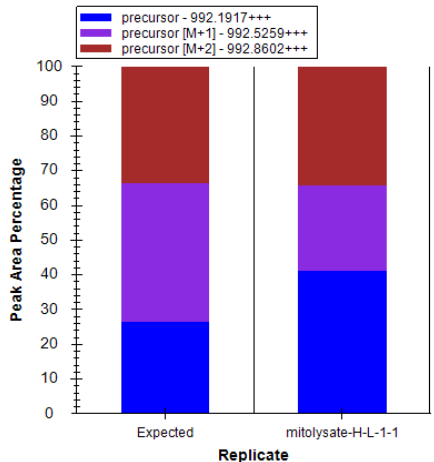

Replicate 1

# Hsp60

K.QIENAGEEGSVIIGtri**K**LIDEYGDDFAK.G [474, 500] (missed 1)

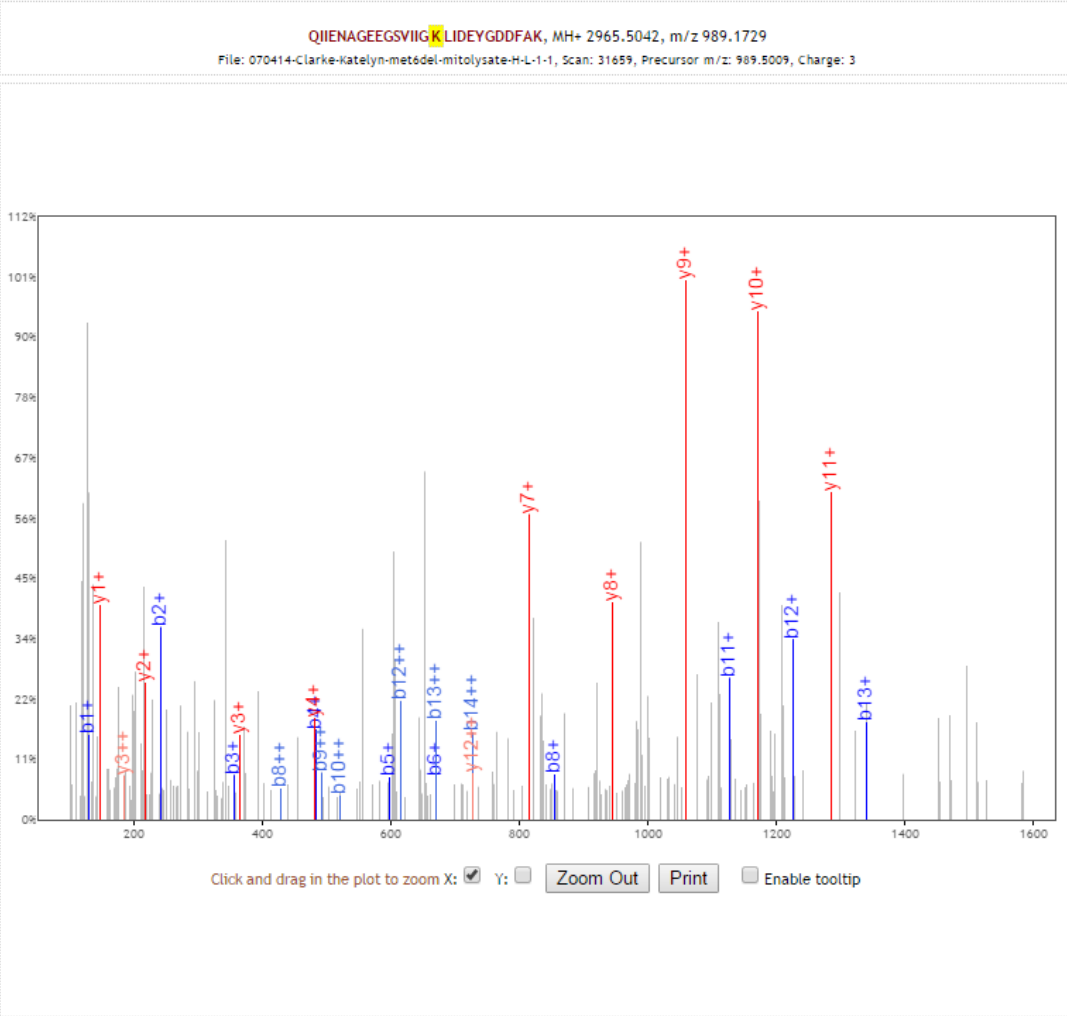

| b+        | b2+       | #  | Seq # | y+ | y2+                 |
|-----------|-----------|----|-------|----|---------------------|
| 129.0659  | 65.0366   | 1  | Q     | 27 |                     |
| 242.1499  | 121.5786  | 2  | I     | 26 | 2837.4456 1419.2265 |
| 355.2340  | 178.1206  | 3  | I     | 25 | 2724.3616 1362.6844 |
| 484.2766  | 242.6419  | 4  | E     | 24 | 2611.2775 1306.1424 |
| 598.3195  | 299.6634  | 5  | N     | 23 | 2482.2349 1241.6211 |
| 669.3566  | 335.1819  | 6  | A     | 22 | 2368.1920 1184.5996 |
| 726.3781  | 363.6927  | 7  | G     | 21 | 2297.1549 1149.0811 |
| 855.4207  | 428.2140  | 8  | E     | 20 | 2240.1334 1120.5703 |
| 984.4633  | 492.7353  | 9  | E     | 19 | 2111.0908 1056.0491 |
| 1041.4847 | 521.2460  | 10 | G     | 18 | 1982.0482 991.5278  |
| 1128.5168 | 564.7620  | 11 | S     | 17 | 1925.0268 963.0170  |
| 1227.5852 | 614.2962  | 12 | V     | 16 | 1837.9947 919.5010  |
| 1340.6692 | 670.8383  | 13 | I     | 15 | 1738.9263 869.9668  |
| 1453.7533 | 727.3803  | 14 | I     | 14 | 1625.8423 813.4248  |
| 1510.7748 | 755.8910  | 15 | G     | 13 | 1512.7582 756.8827  |
| 1680.9168 | 840.9621  | 16 | K     | 12 | 1455.7367 728.3720  |
| 1794.0009 | 897.5041  | 17 | L     | 11 | 1285.5947 643.3010  |
| 1907.0850 | 954.0461  | 18 | I     | 10 | 1172.5106 586.7589  |
| 2022.1119 | 1011.5596 | 19 | D     | 9  | 1059.4265 530.2169  |
| 2151.1545 | 1076.0809 | 20 | E     | 8  | 944.3996 472.7034   |
| 2314.2178 | 1157.6125 | 21 | Y     | 7  | 815.3570 408.1821   |
| 2371.2393 | 1186.1233 | 22 | G     | 6  | 652.2937 326.6505   |
| 2486.2662 | 1243.6368 | 23 | D     | 5  | 595.2722 298.1397   |
| 2601.2932 | 1301.1502 | 24 | D     | 4  | 480.2453 240.6263   |
| 2748.3616 | 1374.6844 | 25 | F     | 3  | 365.2183 183.1128   |
| 2819.3987 | 1410.2030 | 26 | A     | 2  | 218.1499 109.5786   |
|           |           | 27 | K     | 1  | 147.1128 74.0600    |

[\[Click\]](#) to move table  
 Static Modifications:  
 C: 57.02146  
 Variable Modifications:  
 K: 42.0471

# Ald4

## R.VYVEESIYDKFIEEFtri**K**AASESIK.V [329, 351] (missed 2)

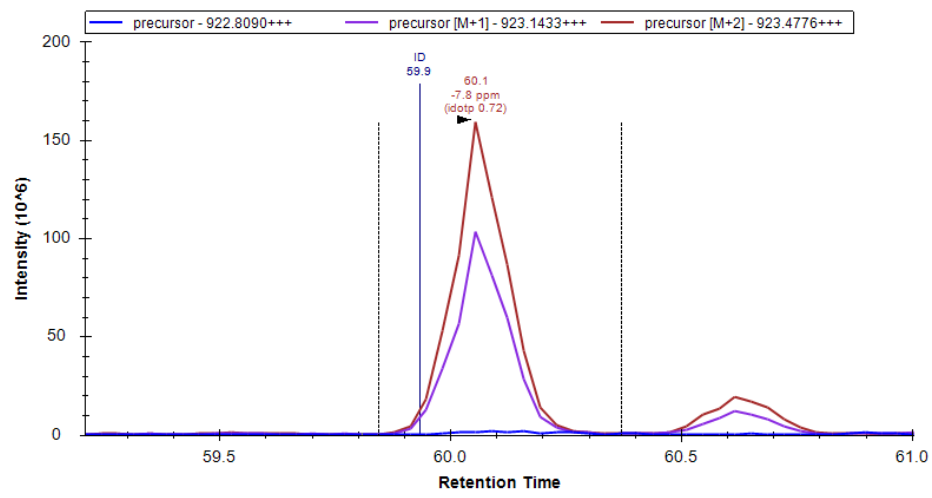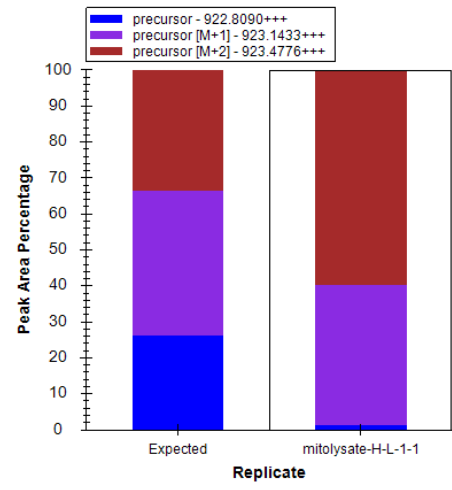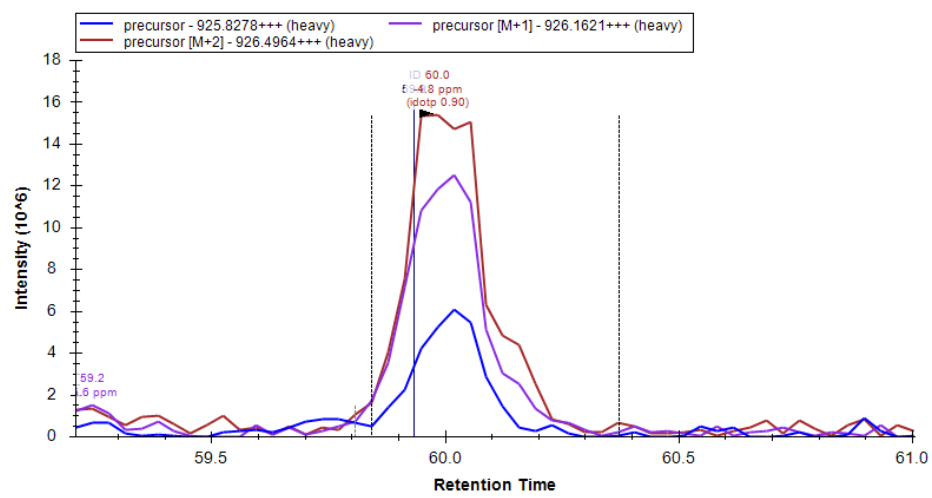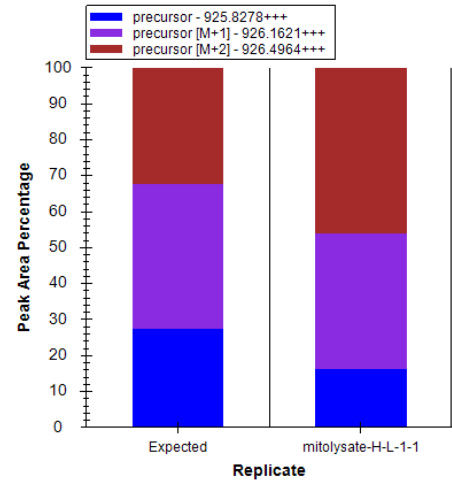

Replicate 1

# Ald4

## R.VYVEESIYDKFIEEFtri**K**AASESIK.V [329, 351] (missed 2)

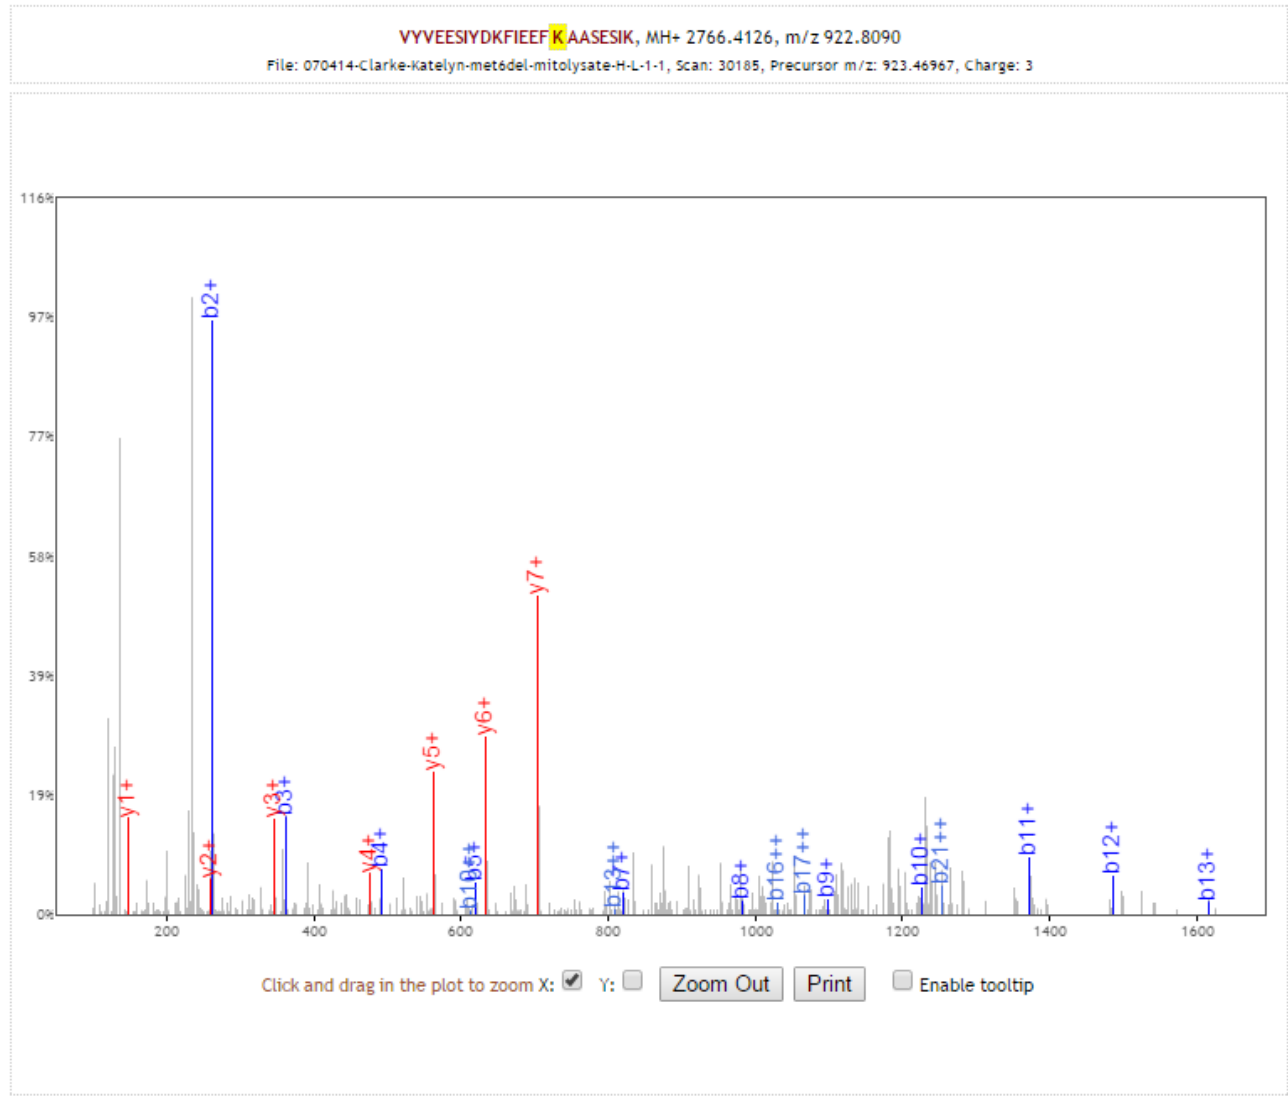

| b+        | b2+       | #  | Seq # | y+        | y2+       |
|-----------|-----------|----|-------|-----------|-----------|
| 100.0757  | 50.5415   | 1  | V 23  |           |           |
| 263.1390  | 132.0731  | 2  | Y 22  | 2667.3441 | 1334.1757 |
| 362.2074  | 181.6074  | 3  | V 21  | 2504.2808 | 1252.6440 |
| 491.2500  | 246.1287  | 4  | E 20  | 2405.2124 | 1203.1098 |
| 620.2926  | 310.6499  | 5  | E 19  | 2276.1698 | 1138.5885 |
| 707.3246  | 354.1660  | 6  | S 18  | 2147.1272 | 1074.0672 |
| 820.4087  | 410.7080  | 7  | I 17  | 2060.0952 | 1030.5512 |
| 983.4720  | 492.2397  | 8  | Y 16  | 1947.0111 | 974.0092  |
| 1098.4990 | 549.7531  | 9  | D 15  | 1783.9478 | 892.4775  |
| 1226.5939 | 613.8006  | 10 | K 14  | 1668.9208 | 834.9641  |
| 1373.6624 | 687.3348  | 11 | F 13  | 1540.8259 | 770.9166  |
| 1486.7464 | 743.8768  | 12 | I 12  | 1393.7575 | 697.3824  |
| 1615.7890 | 808.3981  | 13 | E 11  | 1280.6734 | 640.8403  |
| 1744.8316 | 872.9194  | 14 | E 10  | 1151.6308 | 576.3190  |
| 1891.9000 | 946.4537  | 15 | F 9   | 1022.5882 | 511.7977  |
| 2062.0421 | 1031.5247 | 16 | K 8   | 875.5198  | 438.2635  |
| 2133.0792 | 1067.0432 | 17 | A 7   | 705.3777  | 353.1925  |
| 2204.1163 | 1102.5618 | 18 | A 6   | 634.3406  | 317.6740  |
| 2291.1483 | 1146.0778 | 19 | S 5   | 563.3035  | 282.1554  |
| 2420.1909 | 1210.5991 | 20 | E 4   | 476.2715  | 238.6394  |
| 2507.2230 | 1254.1151 | 21 | S 3   | 347.2289  | 174.1181  |
| 2620.3070 | 1310.6572 | 22 | I 2   | 260.1969  | 130.6021  |
|           |           | 23 | K 1   | 147.1128  | 74.0600   |

[\[Click\]](#) to move table  
 Static Modifications:  
 C: 57.02146  
 Variable Modifications:  
 K: 42.0471

# Aco1

## K.DLLSADKDAEYDEVVEIDLNTLEPYINGPFTPLATPVSDiK.M

### [320, 359] (missed 1)

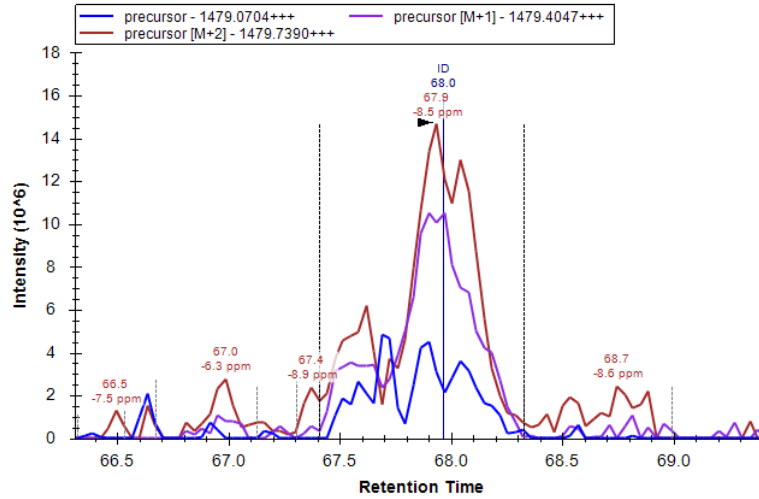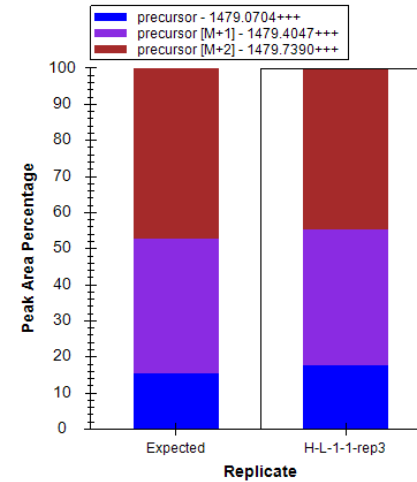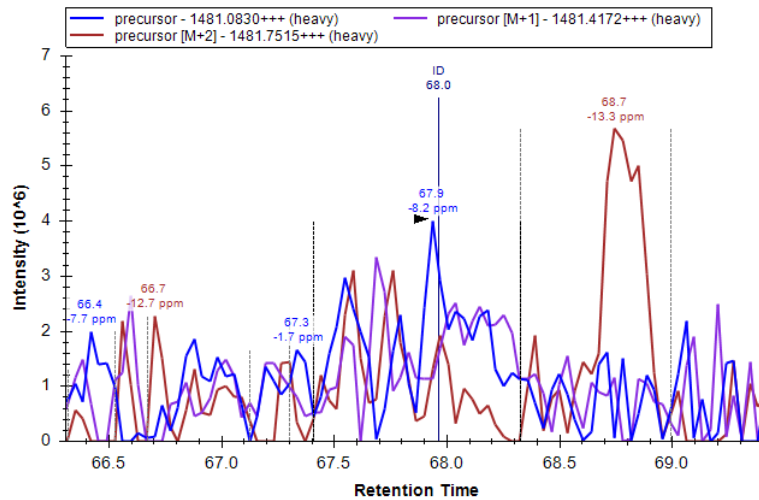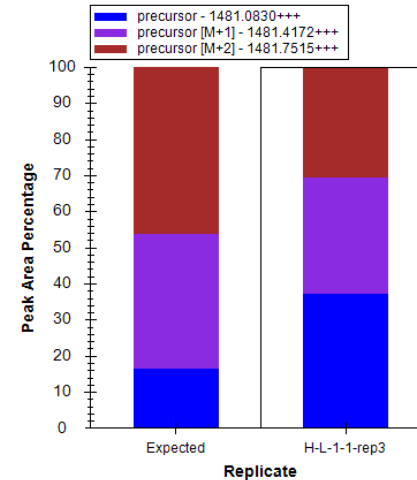

Replicate 3

# Aco1

## K.DLLSADKDAEYDEVVEIDLNTLEPYINGPFTPLATPVSDiK.M [320, 359] (missed 1)

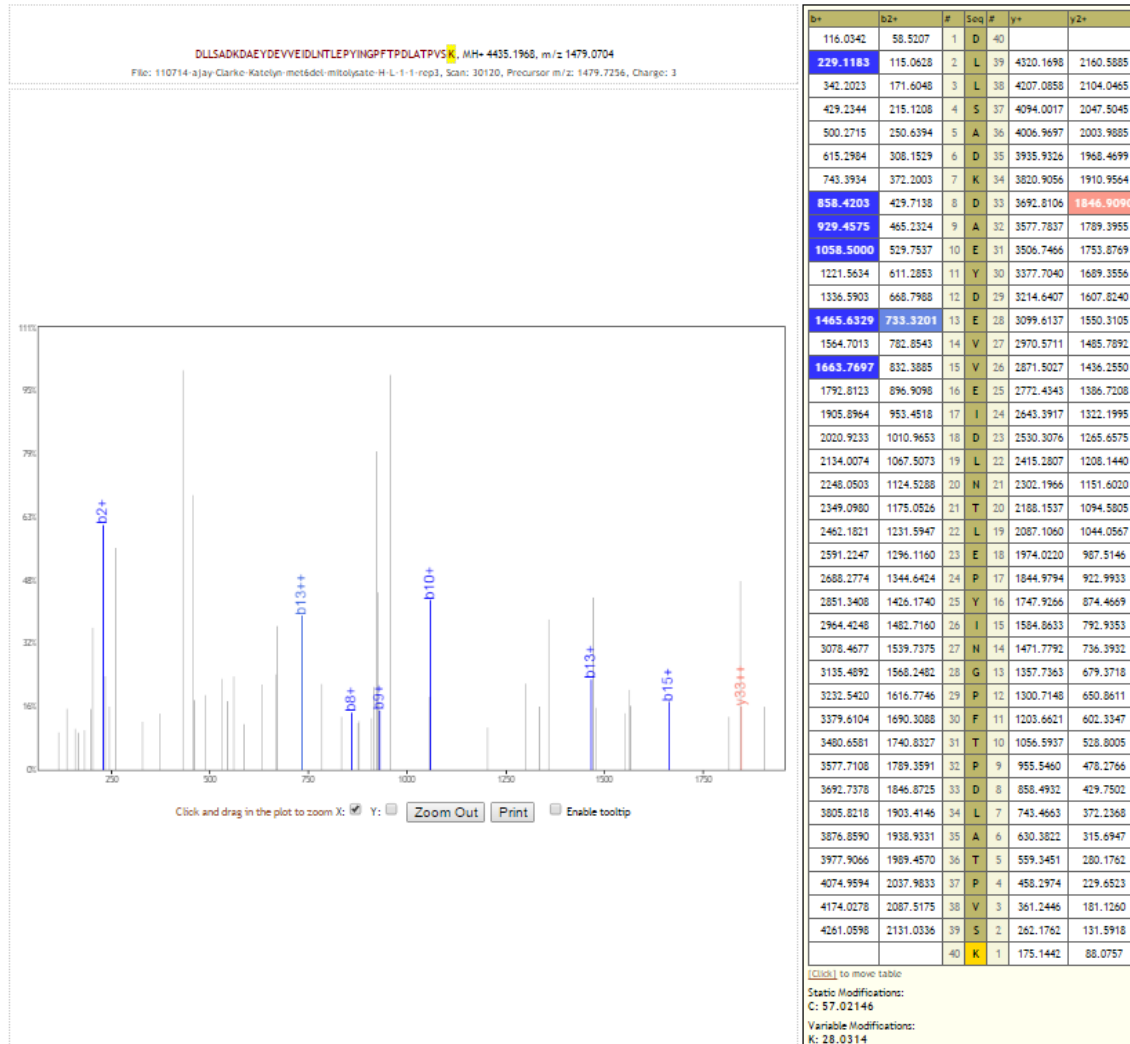

Replicate 3
